# Supplementary material for: Uncertainty analysis of projections of ozone-depleting substances: mixing ratios, EESC, ODPs, and GWPs
Source: Copernicus journal article supplement (doi:10.5194/acp-14-2757-2014), 2014-03-17
Supplement: Supplementary file 2 [file acp-14-2757-2014-supplement.zip]

Archive with 3 entries (3 files):
- All_parameters_SPARC2013_mostlikely_mc.dat
- All_parameters_SPARC2013_possible_mc.dat
- Paper_ODS_uncertainties_revised_suppl.pdf
