# Supplementary material for: Uncertainty analysis of projections of ozone-depleting substances: mixing ratios, EESC, ODPs, and GWPs
Source: Copernicus journal article supplement (doi:10.5194/acp-14-2757-2014), 2014-03-17
Supplement: Supplementary file 2 [file acp-14-2757-2014-supplement.zip › All_parameters_SPARC2013_mostlikely_mc.dat]

 Monte_Carlo_runs:     250000
 Lifetimes:            SPARC2013
 Uncertainty_lifetime: Small
 Trend_in_lifetimes:   No
 Emission_fractions:   Calculated
 Production_CCl4:      Calculated
 Fraction_release:     Newman
 Age-of-air:           Spectrum
 Sampling_method:      Latin_Hypercube
 
 File_Parameters:      Parameters.dat
 File_Mixing_ratios:   Observations_WMO2010.dat
 File_Bank:            Bank_WMO2010.dat
 File_Production:      Production_WMO2010.dat
 
 Guus_Velders_(RIVM), Sun Jul 21 22:04:15 2013
 
 Emission_frac    Efrac_mean  Efrac_stdv  Efrac_2.5p   Efrac_50p Efrac_97.5p
 CFC-11              0.04096     0.01333     0.01985     0.03932     0.07171
 CFC-12              0.14678     0.01860     0.11237     0.14601     0.18523
 CFC-113             0.14746     0.04297     0.07535     0.14330     0.24293
 CFC-114             0.10323     0.02708     0.05694     0.10089     0.16330
 CFC-115             0.08105     0.01020     0.06227     0.08062     0.10232
 CCl4                1.00000     0.00000     1.00000     1.00000     1.00000
 CH3CCl3             1.00000     0.00000     1.00000     1.00000     1.00000
 HCFC-22             0.20134     0.04952     0.14012     0.19459     0.29912
 HCFC-141b           0.06908     0.03428     0.03321     0.06357     0.13492
 HCFC-142b           0.11246     0.03833     0.05799     0.10670     0.20085
 Halon-1211          0.07581     0.02523     0.03360     0.07334     0.13222
 Halon-1202          1.00000     0.00000     1.00000     1.00000     1.00000
 Halon-1301          0.03941     0.01176     0.02061     0.03800     0.06646
 Halon-2402          0.04420     0.01536     0.01943     0.04241     0.07930
 CH3Br               1.00000     0.00000     1.00000     1.00000     1.00000
 CH3Cl               1.00000     0.00000     1.00000     1.00000     1.00000
 
 Species            Year  Prod_mean  Bank_mean  Emis_mean   Mix_mean  Prod_stdv  Prod_2.5p   Prod_50p Prod_97.5p  Bank_stdv  Bank_2.5p   Bank_50p Bank_97.5p  Emis_stdv  Emis_2.5p   Emis_50p Emis_97.5p   Mix_stdv   Mix_2.5p    Mix_50p  Mix_97.5p
 CFC-11           1950.0     6623.0   900071.4    14091.1       0.39      331.0     5974.1     6623.0     7271.9   729959.6  -522528.8   896928.4  2342536.0      424.8    13293.9    14078.2    14960.1       0.00       0.39       0.39       0.39
 CFC-11           1951.0     9072.0   892603.3     8087.6       1.00      453.4     8183.2     9072.0     9960.8   729568.4  -529083.8   889464.1  2334383.5      249.2     7618.6     8079.8     8597.7       0.00       1.00       1.00       1.00
 CFC-11           1952.0    13562.0   893587.7    11646.7       1.33      677.7    12233.3    13562.0    14890.7   729152.7  -527345.7   890319.9  2334526.0      357.9    10973.8    11635.7    12379.1       0.00       1.33       1.33       1.33
 CFC-11           1953.0    17282.0   895503.0    15856.1       1.82      863.6    15588.9    17282.0    18975.2   728540.7  -524260.9   892282.5  2335504.3      487.2    14939.9    15841.0    16853.2       0.00       1.82       1.82       1.82
 CFC-11           1954.0    20911.0   896928.9    19679.9       2.48     1045.0    18862.3    20911.0    22959.7   727746.3  -521265.6   893786.4  2335210.5      607.0    18538.1    19660.9    20922.4       0.00       2.48       2.48       2.48
 CFC-11           1955.0    26263.0   898160.0    24372.5       3.29     1312.5    23690.0    26263.0    28836.1   726773.1  -518039.6   895066.9  2334592.5      754.1    22953.9    24349.2    25916.1       0.00       3.29       3.29       3.29
 CFC-11           1956.0    32477.0   900050.4    30383.6       4.30     1623.0    29295.2    32477.0    35658.9   725551.2  -513939.3   896878.4  2333880.3      942.3    28611.2    30354.3    32312.0       0.00       4.30       4.30       4.30
 CFC-11           1957.0    33929.0   902143.8    33988.3       5.55     1695.5    30604.9    33929.0    37253.1   724033.3  -509272.1   898982.8  2333156.5     1063.3    31987.2    33956.0    36162.6       0.00       5.55       5.55       5.55
 CFC-11           1958.0    29529.0   902084.5    31756.1       6.93     1475.7    26636.0    29529.0    32422.1   722396.4  -505774.1   898864.3  2329909.5     1019.5    29835.0    31725.2    33836.1       0.00       6.93       6.93       6.93
 CFC-11           1959.0    35562.0   899857.4    32451.8       8.19     1777.2    32077.9    35562.0    39046.1   720894.6  -505186.4   896649.4  2324741.0     1061.4    30451.7    32419.3    34616.6       0.00       8.19       8.19       8.19
 CFC-11           1960.0    49714.0   902967.6    42689.1       9.45     2484.4    44843.5    49714.0    54584.6   719159.3  -498404.7   899838.3  2323971.0     1372.8    40101.5    42647.0    45491.3       0.00       9.45       9.45       9.45
 CFC-11           1961.0    60464.0   909992.5    54951.1      11.14     3021.6    54540.3    60464.0    66387.9   716818.1  -486987.0   906957.4  2326427.0     1750.4    51653.8    54897.2    58525.0       0.00      11.14      11.14      11.14
 CFC-11           1962.0    78109.0   915505.4    68956.5      13.33     3903.4    70456.6    78109.1    85761.6   713949.3  -475976.9   912474.4  2326481.5     2186.6    64838.3    68889.4    73426.2       0.00      13.33      13.33      13.33
 CFC-11           1963.0    93304.0   924658.0    84422.6      16.10     4662.7    84162.9    93304.1   102445.3   710302.3  -459357.2   921693.8  2329012.3     2673.7    79387.3    84341.1    89887.3       0.00      16.10      16.10      16.10
 CFC-11           1964.0   111085.0   933539.3   100186.6      19.49     5551.3   100201.9   111085.1   121968.4   705930.2  -441805.2   930748.8  2329594.3     3178.7    94201.0   100088.8   106684.5       0.00      19.49      19.49      19.49
 CFC-11           1965.0   122833.0   944437.7   114123.6      23.50     6138.4   110798.9   122833.1   134867.4   700738.6  -420413.8   941608.4  2330384.3     3641.1   107264.8   114011.2   121555.7       0.00      23.50      23.50      23.50
 CFC-11           1966.0   141022.0   953147.1   127686.0      28.05     7047.3   127205.9   141022.1   154838.4   694932.6  -400313.3   950435.4  2328121.8     4102.5   119955.1   127561.2   136056.1       0.00      28.05      28.05      28.05
 CFC-11           1967.0   159756.0   966483.1   144835.1      33.10     7983.5   144104.5   159756.1   175407.8   688307.9  -374693.9   963822.3  2328114.3     4675.4   136020.8   144693.5   154380.9       0.00      33.10      33.10      33.10
 CFC-11           1968.0   183116.0   981404.0   164910.8      38.81     9150.9   165175.9   183116.1   201056.5   680806.4  -345897.9   978697.6  2328381.5     5343.0   154841.4   164749.9   175822.2       0.00      38.81      38.81      38.81
 CFC-11           1969.0   218271.0   999609.2   191392.0      45.29    10907.7   196886.7   218271.2   239655.7   672251.3  -310865.2   997162.2  2329886.0     6205.4   179699.0   191204.9   204062.6       0.00      45.29      45.29      45.29
 CFC-11           1970.0   240136.0  1026488.2   217482.0      52.81    12000.4   216609.6   240136.2   263662.9   662214.5  -265092.2  1023906.4  2337442.0     7075.4   204147.0   217268.0   231926.6       0.00      52.81      52.81      52.81
 CFC-11           1971.0   266175.0  1049142.2   238920.2      61.32    13301.7   240097.5   266175.2   292253.1   651116.8  -220880.6  1046343.3  2337917.0     7834.2   224156.4   238681.5   254897.3       0.00      61.32      61.32      61.32
 CFC-11           1972.0   310856.0  1076397.1   269406.9      70.61    15534.5   280401.0   310856.2   341311.6   638893.1  -169120.8  1073623.1  2339904.3     8861.9   252702.0   269138.8   287478.3       0.00      70.61      70.61      70.61
 CFC-11           1973.0   353985.0  1117846.2   308469.6      81.06    17689.8   319304.7   353985.3   388666.1   624928.6  -100318.7  1115370.1  2353806.5    10150.9   289334.6   308161.9   329168.5       0.00      81.06      81.06      81.06
 CFC-11           1974.0   377024.0  1163361.6   339495.1      93.02    18841.2   340086.5   377024.3   413962.3   609240.7   -24472.6  1160734.4  2368698.3    11246.5   318288.9   339160.5   362427.4       0.00      93.02      93.02      93.02
 CFC-11           1975.0   323968.0  1200890.4   328483.5     106.11    16189.8   292228.4   323968.3   355708.2   592544.8    45801.6  1198216.0  2373111.8    11224.4   307314.7   328158.4   351385.1       0.00     106.11     106.11     106.11
 CFC-11           1976.0   352032.0  1196375.0   335152.2     118.47    17592.2   317543.0   352032.3   386521.8   577356.8    70323.9  1193785.3  2338267.5    11690.3   313095.7   334823.2   358982.9       0.00     118.47     118.47     118.47
 CFC-11           1977.0   332964.0  1213254.7   321797.2     130.89    16639.3   300343.1   332964.3   365585.6   561291.5   118282.2  1210513.1  2321660.5    11658.1   299761.4   321490.6   345540.3       0.00     130.89     130.89     130.89
 CFC-11           1978.0   322952.0  1224421.5   305739.5     142.48    16139.0   291312.0   322952.3   354592.7   545815.0   160211.3  1222010.8  2302552.0    11578.6   283819.2   305442.4   329308.2       0.00     142.48     142.48     142.48
 CFC-11           1979.0   306983.0  1241634.0   265857.0     153.15    15341.0   276907.5   306983.2   337059.2   530714.8   207659.8  1238859.5  2289565.0    10968.5   245066.1   265597.3   288153.2       0.00     153.15     153.15     153.15
 CFC-11           1980.0   310019.0  1282760.0   263017.1     161.87    15492.7   279646.1   310019.2   340392.6   516355.3   276760.6  1280178.3  2302896.0    11193.8   241788.0   262751.3   285730.4       0.00     161.87     161.87     161.87
 CFC-11           1981.0   310043.0  1329761.9   276310.0     170.30    15493.9   279667.7   310043.2   340418.9   501987.7   352281.5  1327161.5  2321203.0    11768.0   253991.5   276030.7   300184.1       0.00     170.30     170.30     170.30
 CFC-11           1982.0   310055.0  1363494.9   266002.5     179.15    15494.5   279678.5   310055.2   340432.1   487578.8   414164.4  1361374.3  2326708.5    11851.3   243506.3   265727.7   289971.8       0.00     179.15     179.15     179.15
 CFC-11           1983.0   332168.0  1407547.4   278816.6     187.38    16599.6   299625.1   332168.3   364711.6   473348.7   485581.1  1405929.8  2342109.3    12408.2   255266.5   278528.1   303920.3       0.00     187.38     187.38     187.38
 CFC-11           1984.0   354629.0  1460898.8   298625.2     196.02    17722.0   319885.6   354629.3   389373.2   458717.0   568092.1  1459174.3  2366039.3    13126.9   273715.1   298318.7   325201.8       0.00     196.02     196.02     196.02
 CFC-11           1985.0   370925.0  1516902.6   328363.3     205.36    18536.4   334585.0   370925.3   407265.8   443743.0   651777.7  1515346.5  2393557.0    14085.4   301636.1   328033.6   356922.9       0.00     205.36     205.36     205.36
 CFC-11           1986.0   390257.8  1559464.3   348561.7     215.82    19502.5   352023.7   390258.0   428492.6   428608.9   723602.6  1557664.3  2405910.0    14878.5   320344.1   348212.9   378737.9       0.00     215.82     215.82     215.82
 CFC-11           1987.0   378171.8  1601160.4   350103.7     226.97    18898.5   341121.9   378172.1   415222.6   413487.4   794475.6  1599421.8  2417684.8    15291.7   321092.7   349747.9   381069.8       0.00     226.97     226.97     226.97
 CFC-11           1988.0   366085.9  1629228.5   325892.4     237.97    18294.5   330220.0   366086.2   401952.6   399121.2   851820.6  1627456.0  2416199.0    15178.9   297035.7   325545.9   356564.9       0.00     237.97     237.97     237.97
 CFC-11           1989.0   354000.0  1669422.0   301539.3     247.71    17690.6   319318.2   354000.3   388682.6   385697.2   917280.3  1668163.0  2428745.5    15066.1   272842.3   301201.2   331938.6       0.00     247.71     247.71     247.71
 CFC-11           1990.0   264117.2  1721882.6   249735.9     256.19    13198.8   238241.3   264117.4   289993.7   373254.0   993311.3  1720653.9  2457630.3    14486.8   222041.8   249461.0   278872.8       0.00     256.19     256.19     256.19
 CFC-11           1991.0   244683.9  1736264.0   181971.2     262.24    12227.7   220711.9   244684.0   268656.4   362550.3  1028149.3  1735430.4  2450554.3    13750.8   155511.3   181771.4   209450.7       0.00     262.24     262.24     262.24
 CFC-11           1992.0   217765.9  1798976.6   174496.0     265.21    10882.5   196431.1   217766.0   239101.1   352828.8  1110584.1  1798499.3  2492925.8    13787.1   147938.7   174302.5   201994.6       0.00     265.21     265.21     265.21
 CFC-11           1993.0   175152.7  1842246.5   115789.4     267.80     8753.0   157992.7   175152.8   192313.0   343898.2  1171177.4  1841867.5  2518734.8    13284.1    90053.8   115654.7   142170.0       0.00     267.80     267.80     267.80
 CFC-11           1994.0    99738.0  1901609.8   107495.5     267.77     4984.2    89966.5    99738.1   109509.7   335930.1  1245482.4  1901185.1  2561643.5    13212.2    81870.9   107380.7   133736.7       0.00     267.77     267.77     267.77
 CFC-11           1995.0    72593.3  1893852.3   103277.0     267.37     3627.7    65481.3    72593.4    79705.5   328789.8  1250877.4  1893770.9  2539584.0    13159.8    77731.0   103164.9   129411.6       0.00     267.37     267.37     267.37
 CFC-11           1996.0    55828.0  1863168.6    98110.6     266.80     2789.9    50358.5    55828.1    61297.7   322202.6  1233501.3  1863143.3  2496377.0    13093.1    72684.3    98005.2   124114.7       0.00     266.80     266.80     266.80
 CFC-11           1997.0    62472.7  1820886.1    81252.2     266.01     3122.0    56352.1    62472.7    68593.3   316130.7  1202889.8  1820736.5  2441920.8    12936.7    56094.0    81169.0   106898.7       0.00     266.01     266.01     266.01
 CFC-11           1998.0    54269.1  1802106.5    87494.9     264.50     2712.0    48952.3    54269.2    59586.1   310554.4  1194491.8  1801914.8  2412343.5    12908.7    62398.9    87405.6   113106.3       0.00     264.50     264.50     264.50
 CFC-11           1999.0    53986.1  1768880.7    78317.8     263.30     2697.9    48697.0    53986.1    59275.3   305481.6  1170191.4  1768783.5  2368502.3    12790.8    53437.7    78235.9   103673.4       0.00     263.30     263.30     263.30
 CFC-11           2000.0    44023.9  1744549.0    77291.5     261.71     2200.0    39710.9    44024.0    48337.1   300935.2  1153991.0  1744421.9  2334664.3    12710.2    52570.3    77211.1   102486.3       0.00     261.71     261.71     261.71
 CFC-11           2001.0    32184.2  1711281.4    71589.3     260.11     1608.4    29031.1    32184.2    35337.4   296925.3  1128358.5  1711118.9  2293187.3    12600.0    47064.4    71517.9    96551.6       0.00     260.11     260.11     260.11
 CFC-11           2002.0    31822.8  1671876.3    58312.1     258.29     1590.3    28705.1    31822.9    34940.6   293459.8  1095573.3  1671709.3  2247333.8    12440.6    34084.9    58256.5    82923.5       0.00     258.29     258.29     258.29
 CFC-11           2003.0    25443.8  1645387.0    66062.8     255.92     1271.5    22951.0    25443.8    27936.6   290539.5  1074653.5  1645369.0  2215022.8    12371.5    41973.0    65995.0    90559.6       0.00     255.92     255.92     255.92
 CFC-11           2004.0    22276.9  1604768.0    56367.0     253.94     1113.3    20094.4    22276.9    24459.4   288149.0  1039494.7  1605003.5  2169638.3    12226.2    32556.8    56313.4    80554.7       0.00     253.94     253.94     253.94
 CFC-11           2005.0    13834.8  1570677.8    59592.2     251.57      691.4    12479.4    13834.8    15190.2   286296.0  1009146.6  1570722.0  2131761.0    12131.6    35970.5    59535.4    83595.7       0.00     251.57     251.57     251.57
 CFC-11           2006.0    10714.2  1524920.3    57953.0     249.39      535.4     9664.5    10714.2    11763.9   284967.3   966052.5  1524849.8  2083272.0    12020.4    34544.4    57897.4    81736.5       0.00     249.39     249.39     249.39
 CFC-11           2007.0     2662.8  1477681.6    60327.3     247.17      133.1     2401.9     2662.8     2923.6   284156.4   920328.8  1477750.3  2034809.8    11929.2    37100.2    60269.9    83941.1       0.00     247.17     247.17     247.17
 CFC-11           2008.0     1206.6  1420017.0    65624.5     245.11       60.3     1088.4     1206.6     1324.8   283852.3   863534.7  1420021.0  1976519.4    11862.4    42534.7    65559.1    89118.6       0.00     245.11     245.11     245.11
 CFC-11           2009.0     2058.3  1355599.2    53371.4     243.31      102.9     1856.6     2058.3     2260.0   284047.2   798749.5  1355567.1  1912400.9    13662.8    28838.5    52609.6    82169.6       0.00     243.31     243.31     243.31
 CFC-11           2010.0     2366.0  1304286.0    51159.6     241.01      118.2     2134.2     2366.0     2597.8   282576.2   751782.1  1303795.5  1859147.1    12630.7    28195.7    50555.0    77557.5       0.51     239.95     241.03     241.96
 CFC-11           2011.0        0.0  1255492.4    48955.9     238.66        0.0        0.0        0.0        0.0   281328.0   706606.4  1254691.3  1809186.1    11671.4    27517.2    48464.8    73150.4       0.98     236.60     238.71     240.48
 CFC-11           2012.0        0.0  1206536.5    46856.3     236.26        0.0        0.0        0.0        0.0   280191.6   661315.9  1204999.8  1760024.5    10801.3    26842.0    46465.7    69103.0       1.43     233.26     236.33     238.88
 CFC-11           2013.0        0.0  1159680.2    44855.3     233.82        0.0        0.0        0.0        0.0   279096.9   618723.4  1157540.8  1712964.1    10013.9    26148.3    44542.4    65363.7       1.85     229.93     233.91     237.17
 CFC-11           2014.0        0.0  1114824.9    42947.9     231.33        0.0        0.0        0.0        0.0   277989.7   578355.0  1111975.8  1668251.0     9303.2    25456.7    42693.3    61901.0       2.24     226.60     231.45     235.39
 CFC-11           2015.0        0.0  1071877.0    41129.2     228.81        0.0        0.0        0.0        0.0   276829.1   539994.6  1068174.8  1624695.5     8663.7    24745.6    40918.7    58695.9       2.62     223.28     228.95     233.52
 CFC-11           2016.0        0.0  1030747.8    39394.9     226.25        0.0        0.0        0.0        0.0   275584.9   504147.0  1026230.3  1583499.5     8090.2    23996.4    39216.5    55717.0       2.98     219.96     226.42     231.61
 CFC-11           2017.0        0.0   991353.0    37740.5     223.67        0.0        0.0        0.0        0.0   274235.9   470293.5   986071.5  1543812.8     7577.6    23244.5    37596.0    52987.6       3.32     216.65     223.85     229.64
 CFC-11           2018.0        0.0   953612.4    36162.1     221.07        0.0        0.0        0.0        0.0   272768.0   438882.0   947238.5  1505987.1     7121.2    22500.8    36040.2    50440.5       3.66     213.35     221.27     227.64
 CFC-11           2019.0        0.0   917450.3    34655.9     218.44        0.0        0.0        0.0        0.0   271172.5   409067.3   910133.9  1469741.0     6716.5    21706.8    34558.7    48075.9       3.98     210.05     218.66     225.60
 CFC-11           2020.0        0.0   882794.4    33218.3     215.81        0.0        0.0        0.0        0.0   269445.1   381764.1   874380.3  1434279.5     6359.0    20913.5    33136.2    45890.2       4.29     206.76     216.04     223.54
 CFC-11           2021.0        0.0   849576.0    31845.9     213.16        0.0        0.0        0.0        0.0   267585.1   356006.2   839896.8  1400364.9     6044.5    20094.9    31791.4    43854.5       4.60     203.47     213.40     221.46
 CFC-11           2022.0        0.0   817730.1    30535.4     210.50        0.0        0.0        0.0        0.0   265594.3   331464.3   806974.8  1367079.3     5768.9    19277.9    30502.6    41963.2       4.90     200.18     210.75     219.35
 CFC-11           2023.0        0.0   787194.7    29283.8     207.83        0.0        0.0        0.0        0.0   263476.5   308364.4   775119.6  1335192.5     5528.0    18434.0    29274.1    40158.7       5.19     196.92     208.10     217.23
 CFC-11           2024.0        0.0   757910.9    28088.3     205.17        0.0        0.0        0.0        0.0   261237.0   287313.9   744753.3  1304756.6     5318.2    17569.3    28107.8    38473.0       5.48     193.65     205.44     215.11
 CFC-11           2025.0        0.0   729822.7    26946.0     202.50        0.0        0.0        0.0        0.0   258882.2   267316.6   715610.9  1274585.1     5135.6    16700.1    26990.0    36896.5       5.76     190.41     202.77     212.97
 CFC-11           2026.0        0.0   702876.7    25854.4     199.83        0.0        0.0        0.0        0.0   256419.2   248734.8   687583.5  1245938.5     4976.9    15844.4    25920.8    35429.5       6.04     187.21     200.11     210.83
 CFC-11           2027.0        0.0   677022.3    24811.1     197.16        0.0        0.0        0.0        0.0   253855.7   231273.5   660434.0  1217944.8     4838.9    14985.4    24897.8    34071.5       6.31     184.01     197.45     208.68
 CFC-11           2028.0        0.0   652211.2    23813.7     194.51        0.0        0.0        0.0        0.0   251199.3   215521.5   634583.4  1190361.4     4718.5    14135.1    23918.9    32770.9       6.58     180.82     194.80     206.55
 CFC-11           2029.0        0.0   628397.4    22860.1     191.85        0.0        0.0        0.0        0.0   248458.2   200500.8   609746.3  1163520.5     4613.1    13295.7    22989.1    31561.6       6.84     177.66     192.16     204.41
 CFC-11           2030.0        0.0   605537.3    21948.1     189.21        0.0        0.0        0.0        0.0   245640.1   186393.2   585918.9  1137821.1     4520.4    12485.5    22098.6    30408.1       7.10     174.50     189.52     202.28
 CFC-11           2031.0        0.0   583589.2    21075.8     186.58        0.0        0.0        0.0        0.0   242753.1   173358.5   562838.4  1113198.3     4438.1    11703.4    21245.8    29330.9       7.35     171.38     186.88     200.13
 CFC-11           2032.0        0.0   562513.3    20241.3     183.96        0.0        0.0        0.0        0.0   239804.7   161008.8   540673.0  1088379.1     4364.4    10953.3    20431.8    28313.1       7.60     168.27     184.25     198.01
 CFC-11           2033.0        0.0   542272.0    19442.9     181.36        0.0        0.0        0.0        0.0   236802.2   149827.5   519492.1  1064712.5     4297.8    10246.7    19649.0    27340.9       7.84     165.20     181.64     195.89
 CFC-11           2034.0        0.0   522829.2    18678.7     178.77        0.0        0.0        0.0        0.0   233752.9   139261.7   499075.7  1041784.3     4236.7     9580.7    18899.2    26427.7       8.08     162.16     179.05     193.78
 CFC-11           2035.0        0.0   504150.5    17947.3     176.20        0.0        0.0        0.0        0.0   230663.4   129438.4   479451.9  1019296.4     4180.1     8936.6    18181.7    25551.6       8.31     159.16     176.47     191.68
 CFC-11           2036.0        0.0   486203.2    17247.1     173.64        0.0        0.0        0.0        0.0   227540.3   120342.3   460622.0   997303.4     4126.9     8325.4    17494.2    24721.2       8.54     156.18     173.90     189.58
 CFC-11           2037.0        0.0   468956.1    16576.6     171.11        0.0        0.0        0.0        0.0   224389.8   111972.8   442480.9   975999.3     4076.4     7768.0    16834.3    23925.0       8.76     153.22     171.35     187.50
 CFC-11           2038.0        0.0   452379.5    15934.6     168.59        0.0        0.0        0.0        0.0   221217.5   104168.9   425138.8   955258.3     4027.9     7234.4    16199.1    23168.6       8.97     150.31     168.83     185.42
 CFC-11           2039.0        0.0   436444.9    15319.6     166.09        0.0        0.0        0.0        0.0   218028.9    96802.3   408409.1   934824.8     3980.7     6732.8    15589.3    22462.4       9.18     147.43     166.32     183.36
 CFC-11           2040.0        0.0   421125.3    14730.5     163.62        0.0        0.0        0.0        0.0   214829.2    89929.8   392424.8   915012.6     3934.5     6262.3    14999.4    21775.1       9.39     144.57     163.83     181.31
 CFC-11           2041.0        0.0   406394.9    14166.0     161.16        0.0        0.0        0.0        0.0   211623.0    83534.0   377020.1   895580.9     3888.9     5835.7    14434.9    21128.9       9.58     141.75     161.36     179.28
 CFC-11           2042.0        0.0   392228.9    13625.1     158.73        0.0        0.0        0.0        0.0   208414.9    77645.0   362306.1   876585.9     3843.6     5432.3    13889.6    20505.4       9.77     138.98     158.92     177.25
 CFC-11           2043.0        0.0   378603.8    13106.7     156.32        0.0        0.0        0.0        0.0   205209.1    72228.6   348151.8   858309.7     3798.5     5054.8    13362.4    19907.7       9.96     136.26     156.51     175.25
 CFC-11           2044.0        0.0   365497.1    12609.7     153.94        0.0        0.0        0.0        0.0   202009.2    67111.5   334476.4   839990.9     3753.3     4703.9    12858.0    19338.0      10.14     133.56     154.11     173.25
 CFC-11           2045.0        0.0   352887.4    12133.3     151.58        0.0        0.0        0.0        0.0   198818.9    62394.2   321347.8   822179.4     3707.9     4371.3    12370.1    18797.2      10.31     130.91     151.74     171.27
 CFC-11           2046.0        0.0   340754.2    11676.4     149.24        0.0        0.0        0.0        0.0   195641.5    57957.4   308734.9   804940.1     3662.3     4063.4    11900.3    18278.7      10.47     128.29     149.39     169.29
 CFC-11           2047.0        0.0   329077.8    11238.3     146.93        0.0        0.0        0.0        0.0   192480.0    53811.4   296622.3   788033.6     3616.4     3780.6    11446.0    17776.0      10.63     125.71     147.06     167.33
 CFC-11           2048.0        0.0   317839.5    10818.0     144.64        0.0        0.0        0.0        0.0   189337.1    50018.8   284907.2   771384.3     3570.1     3515.2    11008.6    17298.5      10.79     123.18     144.75     165.39
 CFC-11           2049.0        0.0   307021.5    10414.8     142.38        0.0        0.0        0.0        0.0   186215.3    46494.7   273770.6   755133.9     3523.6     3267.9    10589.3    16834.6      10.93     120.70     142.47     163.46
 CFC-11           2050.0        0.0   296606.7    10028.0     140.15        0.0        0.0        0.0        0.0   183117.1    43228.8   263046.6   739245.5     3476.6     3041.5    10184.2    16390.2      11.07     118.23     140.22     161.55
 CFC-11           2051.0        0.0   286578.7     9656.8     137.94        0.0        0.0        0.0        0.0   180044.5    40123.4   252704.4   723708.9     3429.4     2827.7     9793.4    15962.5      11.21     115.81     137.99     159.65
 CFC-11           2052.0        0.0   276921.8     9300.6     135.75        0.0        0.0        0.0        0.0   176999.3    37271.3   242766.3   708773.6     3381.9     2630.6     9418.6    15550.7      11.34     113.43     135.80     157.77
 CFC-11           2053.0        0.0   267621.3     8958.6     133.60        0.0        0.0        0.0        0.0   173983.4    34624.3   233270.5   693933.4     3334.2     2446.0     9055.8    15153.3      11.46     111.09     133.62     155.90
 CFC-11           2054.0        0.0   258662.6     8630.3     131.47        0.0        0.0        0.0        0.0   170998.3    32159.4   224119.5   679729.1     3286.2     2271.7     8707.6    14770.2      11.57     108.80     131.47     154.07
 CFC-11           2055.0        0.0   250032.3     8315.1     129.36        0.0        0.0        0.0        0.0   168045.3    29852.4   215319.0   665756.8     3238.1     2111.5     8371.2    14402.8      11.68     106.54     129.35     152.25
 CFC-11           2056.0        0.0   241717.2     8012.4     127.28        0.0        0.0        0.0        0.0   165125.7    27714.4   206868.2   651979.0     3189.9     1963.0     8045.6    14047.3      11.79     104.31     127.25     150.44
 CFC-11           2057.0        0.0   233704.7     7721.7     125.23        0.0        0.0        0.0        0.0   162240.6    25730.8   198746.4   638498.2     3141.6     1825.6     7733.0    13702.4      11.89     102.14     125.18     148.65
 CFC-11           2058.0        0.0   225983.0     7442.5     123.21        0.0        0.0        0.0        0.0   159390.9    23892.8   190955.1   625539.9     3093.3     1696.6     7434.8    13370.9      11.98      99.99     123.13     146.86
 CFC-11           2059.0        0.0   218540.5     7174.2     121.21        0.0        0.0        0.0        0.0   156577.5    22169.2   183400.5   612800.8     3045.0     1577.4     7145.7    13049.1      12.06      97.88     121.11     145.09
 CFC-11           2060.0        0.0   211366.3     6916.5     119.24        0.0        0.0        0.0        0.0   153801.1    20594.9   176197.8   600120.9     2996.7     1464.4     6868.3    12739.8      12.15      95.82     119.12     143.34
 CFC-11           2061.0        0.0   204449.8     6668.8     117.30        0.0        0.0        0.0        0.0   151062.3    19118.6   169301.7   588061.6     2948.6     1360.8     6600.8    12433.8      12.22      93.79     117.16     141.60
 CFC-11           2062.0        0.0   197781.0     6430.7     115.38        0.0        0.0        0.0        0.0   148361.7    17762.0   162635.1   576068.3     2900.6     1264.8     6342.6    12143.3      12.29      91.80     115.22     139.89
 CFC-11           2063.0        0.0   191350.3     6201.9     113.48        0.0        0.0        0.0        0.0   145699.5    16504.4   156226.2   564495.8     2852.8     1176.2     6095.6    11864.4      12.35      89.84     113.30     138.19
 CFC-11           2064.0        0.0   185148.4     5981.9     111.62        0.0        0.0        0.0        0.0   143076.3    15323.1   150080.3   553011.3     2805.3     1092.1     5857.6    11589.5      12.41      87.92     111.42     136.48
 CFC-11           2065.0        0.0   179166.5     5770.4     109.78        0.0        0.0        0.0        0.0   140492.1    14239.2   144176.8   541916.9     2758.0     1014.3     5629.1    11322.7      12.47      86.04     109.55     134.80
 CFC-11           2066.0        0.0   173396.1     5567.0     107.96        0.0        0.0        0.0        0.0   137947.3    13227.1   138504.0   530884.6     2711.0      942.0     5409.9    11064.8      12.52      84.20     107.73     133.12
 CFC-11           2067.0        0.0   167829.0     5371.5     106.18        0.0        0.0        0.0        0.0   135441.9    12279.7   133070.5   520055.2     2664.4      874.9     5199.3    10811.8      12.56      82.40     105.92     131.48
 CFC-11           2068.0        0.0   162457.6     5183.3     104.41        0.0        0.0        0.0        0.0   132975.9    11400.2   127841.0   509690.8     2618.1      812.5     4996.6    10570.7      12.60      80.63     104.13     129.86
 CFC-11           2069.0        0.0   157274.2     5002.4     102.68        0.0        0.0        0.0        0.0   130549.5    10595.4   122820.6   499119.4     2572.3      754.4     4802.4    10338.5      12.63      78.90     102.37     128.25
 CFC-11           2070.0        0.0   152271.9     4828.3     100.96        0.0        0.0        0.0        0.0   128162.4     9835.5   117986.1   488823.5     2526.8      700.5     4614.6    10103.5      12.66      77.20     100.64     126.65
 CFC-11           2071.0        0.0   147443.6     4660.8      99.28        0.0        0.0        0.0        0.0   125814.6     9129.9   113365.4   479132.8     2481.8      650.3     4433.6     9880.0      12.69      75.53      98.93     125.07
 CFC-11           2072.0        0.0   142782.8     4499.5      97.61        0.0        0.0        0.0        0.0   123506.0     8473.7   108909.8   469175.9     2437.2      603.6     4260.3     9665.2      12.71      73.89      97.25     123.52
 CFC-11           2073.0        0.0   138283.3     4344.4      95.98        0.0        0.0        0.0        0.0   121236.3     7866.5   104632.1   459562.9     2393.2      560.8     4093.7     9452.2      12.72      72.28      95.59     121.98
 CFC-11           2074.0        0.0   133938.9     4195.1      94.36        0.0        0.0        0.0        0.0   119005.4     7301.9   100511.4   450260.9     2349.6      520.7     3933.9     9246.3      12.74      70.71      93.95     120.45
 CFC-11           2075.0        0.0   129743.8     4051.3      92.78        0.0        0.0        0.0        0.0   116812.9     6774.3    96582.1   441167.9     2306.6      483.5     3780.4     9047.2      12.74      69.15      92.35     118.94
 CFC-11           2076.0        0.0   125692.5     3912.9      91.21        0.0        0.0        0.0        0.0   114658.6     6294.8    92782.3   432251.5     2264.1      449.3     3632.8     8849.3      12.75      67.64      90.76     117.44
 CFC-11           2077.0        0.0   121779.7     3779.6      89.67        0.0        0.0        0.0        0.0   112542.2     5844.2    89112.6   423457.3     2222.1      417.4     3490.3     8658.3      12.75      66.17      89.19     115.96
 CFC-11           2078.0        0.0   118000.1     3651.2      88.15        0.0        0.0        0.0        0.0   110463.2     5426.2    85609.4   414867.9     2180.7      387.5     3354.5     8475.5      12.74      64.73      87.65     114.49
 CFC-11           2079.0        0.0   114348.8     3527.6      86.66        0.0        0.0        0.0        0.0   108421.4     5040.8    82250.8   406553.1     2139.9      360.1     3223.5     8296.3      12.74      63.31      86.13     113.06
 CFC-11           2080.0        0.0   110821.2     3408.5      85.19        0.0        0.0        0.0        0.0   106416.3     4678.0    79017.9   398224.1     2099.6      334.2     3098.0     8113.5      12.73      61.92      84.64     111.61
 CFC-11           2081.0        0.0   107412.7     3293.8      83.74        0.0        0.0        0.0        0.0   104447.5     4342.2    75900.8   390161.8     2059.9      310.4     2976.3     7942.9      12.71      60.57      83.17     110.18
 CFC-11           2082.0        0.0   104118.8     3183.3      82.31        0.0        0.0        0.0        0.0   102514.6     4029.4    72914.3   382255.1     2020.8      288.2     2859.2     7776.2      12.69      59.24      81.72     108.77
 CFC-11           2083.0        0.0   100935.5     3076.8      80.91        0.0        0.0        0.0        0.0   100617.3     3738.3    70052.5   374514.0     1982.3      268.0     2746.7     7614.0      12.67      57.93      80.30     107.39
 CFC-11           2084.0        0.0    97858.7     2974.2      79.53        0.0        0.0        0.0        0.0    98754.9     3474.4    67304.4   366751.3     1944.4      248.7     2638.6     7456.3      12.65      56.66      78.89     106.01
 CFC-11           2085.0        0.0    94884.5     2875.3      78.17        0.0        0.0        0.0        0.0    96927.1     3229.2    64667.5   359339.0     1907.1      230.7     2534.9     7298.1      12.62      55.41      77.51     104.64
 CFC-11           2086.0        0.0    92009.2     2780.0      76.83        0.0        0.0        0.0        0.0    95133.4     3001.7    62128.4   352164.2     1870.4      214.3     2435.8     7146.7      12.59      54.18      76.15     103.30
 CFC-11           2087.0        0.0    89229.3     2688.0      75.51        0.0        0.0        0.0        0.0    93373.3     2785.6    59697.6   344925.3     1834.2      198.8     2339.8     6996.5      12.56      52.99      74.82     101.96
 CFC-11           2088.0        0.0    86541.2     2599.4      74.21        0.0        0.0        0.0        0.0    91646.3     2585.1    57339.0   337921.2     1798.7      184.6     2248.5     6847.9      12.53      51.82      73.51     100.64
 CFC-11           2089.0        0.0    83941.8     2514.0      72.94        0.0        0.0        0.0        0.0    89952.0     2404.2    55078.2   331147.0     1763.8      171.4     2160.3     6703.1      12.49      50.66      72.21      99.35
 CFC-11           2090.0        0.0    81427.8     2431.6      71.68        0.0        0.0        0.0        0.0    88289.9     2232.0    52921.9   324439.2     1729.4      159.2     2075.5     6565.3      12.45      49.54      70.93      98.07
 CFC-11           2091.0        0.0    78996.2     2352.2      70.45        0.0        0.0        0.0        0.0    86659.4     2072.7    50844.6   317843.2     1695.7      147.9     1994.1     6430.0      12.41      48.44      69.68      96.80
 CFC-11           2092.0        0.0    76644.0     2275.5      69.24        0.0        0.0        0.0        0.0    85060.0     1925.3    48855.3   311531.8     1662.5      137.3     1915.8     6296.3      12.36      47.36      68.45      95.55
 CFC-11           2093.0        0.0    74368.5     2201.6      68.04        0.0        0.0        0.0        0.0    83491.3     1787.4    46945.1   305202.8     1630.0      127.4     1840.4     6166.2      12.31      46.30      67.24      94.31
 CFC-11           2094.0        0.0    72166.9     2130.3      66.86        0.0        0.0        0.0        0.0    81952.8     1660.4    45096.5   299029.8     1598.0      118.2     1768.0     6037.4      12.26      45.27      66.04      93.09
 CFC-11           2095.0        0.0    70036.6     2061.5      65.71        0.0        0.0        0.0        0.0    80443.9     1543.2    43316.3   293096.0     1566.5      109.7     1698.4     5913.2      12.21      44.26      64.87      91.88
 CFC-11           2096.0        0.0    67975.2     1995.0      64.57        0.0        0.0        0.0        0.0    78964.2     1432.1    41603.0   287143.2     1535.7      101.8     1632.4     5793.5      12.16      43.27      63.72      90.69
 CFC-11           2097.0        0.0    65980.1     1931.0      63.45        0.0        0.0        0.0        0.0    77513.1     1328.9    39966.1   281270.3     1505.4       94.7     1568.2     5673.6      12.10      42.31      62.58      89.51
 CFC-11           2098.0        0.0    64049.2     1869.1      62.35        0.0        0.0        0.0        0.0    76090.3     1234.7    38395.0   275730.5     1475.7       87.9     1506.8     5557.8      12.05      41.36      61.47      88.35
 CFC-11           2099.0        0.0    62180.0     1809.4      61.27        0.0        0.0        0.0        0.0    74695.0     1147.2    36895.0   270139.6     1446.5       81.7     1447.7     5442.3      11.99      40.43      60.37      87.19
 CFC-11           2100.0        0.0    60370.6     1751.8      60.21        0.0        0.0        0.0        0.0    73327.0     1065.9    35441.2   264750.9     1417.9       75.9     1390.8     5329.1      11.93      39.53      59.29      86.04
 CFC-11           2101.0        0.0    58618.8     1696.2      59.16        0.0        0.0        0.0        0.0    71985.7      989.9    34049.6   259222.4     1389.8       70.4     1336.1     5219.2      11.87      38.65      58.23      84.91
 CFC-11           2102.0        0.0    56922.6     1642.4      58.13        0.0        0.0        0.0        0.0    70670.6      919.8    32715.1   254049.7     1362.3       65.5     1283.3     5110.7      11.80      37.78      57.18      83.80
 CFC-11           2103.0        0.0    55280.2     1590.6      57.12        0.0        0.0        0.0        0.0    69381.3      854.3    31419.8   248974.9     1335.3       60.8     1233.0     5008.0      11.74      36.94      56.16      82.69
 CFC-11           2104.0        0.0    53689.6     1540.5      56.12        0.0        0.0        0.0        0.0    68117.2      793.0    30186.1   243959.0     1308.8       56.5     1184.6     4907.0      11.67      36.11      55.15      81.60
 CFC-11           2105.0        0.0    52149.1     1492.1      55.14        0.0        0.0        0.0        0.0    66877.9      735.9    28998.5   239077.0     1282.8       52.4     1138.2     4808.4      11.60      35.30      54.16      80.53
 CFC-11           2106.0        0.0    50657.0     1445.4      54.18        0.0        0.0        0.0        0.0    65662.9      682.7    27859.2   234216.1     1257.3       48.7     1093.5     4709.6      11.53      34.51      53.18      79.45
 CFC-11           2107.0        0.0    49211.7     1400.2      53.23        0.0        0.0        0.0        0.0    64471.9      633.4    26762.8   229436.4     1232.4       45.2     1050.4     4616.5      11.46      33.73      52.23      78.40
 CFC-11           2108.0        0.0    47811.4     1356.6      52.30        0.0        0.0        0.0        0.0    63304.2      588.0    25713.7   224811.1     1207.9       42.0     1009.1     4523.2      11.39      32.97      51.28      77.37
 CFC-11           2109.0        0.0    46454.8     1314.5      51.39        0.0        0.0        0.0        0.0    62159.6      546.3    24703.2   220335.1     1183.9       39.0      969.7     4430.5      11.32      32.23      50.36      76.34
 CFC-11           2110.0        0.0    45140.3     1273.8      50.49        0.0        0.0        0.0        0.0    61037.5      507.5    23728.6   215864.2     1160.4       36.2      931.6     4339.7      11.25      31.50      49.45      75.32
 CFC-11           2111.0        0.0    43866.6     1234.4      49.61        0.0        0.0        0.0        0.0    59937.5      471.5    22790.3   211638.4     1137.3       33.6      895.1     4253.1      11.17      30.80      48.56      74.33
 CFC-11           2112.0        0.0    42632.1     1196.4      48.74        0.0        0.0        0.0        0.0    58859.2      437.9    21890.7   207442.0     1114.7       31.3      859.8     4167.8      11.10      30.10      47.68      73.33
 CFC-11           2113.0        0.0    41435.8     1159.6      47.88        0.0        0.0        0.0        0.0    57802.1      406.7    21036.0   203168.2     1092.6       29.0      826.0     4085.3      11.02      29.43      46.82      72.34
 CFC-11           2114.0        0.0    40276.1     1124.1      47.04        0.0        0.0        0.0        0.0    56765.9      377.4    20204.8   199079.6     1070.9       27.0      793.6     4003.5      10.94      28.77      45.97      71.38
 CFC-11           2115.0        0.0    39152.0     1089.7      46.22        0.0        0.0        0.0        0.0    55750.1      350.6    19411.5   195135.3     1049.6       25.1      762.4     3922.0      10.86      28.12      45.13      70.42
 CFC-11           2116.0        0.0    38062.3     1056.5      45.41        0.0        0.0        0.0        0.0    54754.3      325.8    18644.7   191275.3     1028.8       23.3      732.7     3843.0      10.79      27.49      44.32      69.48
 CFC-11           2117.0        0.0    37005.8     1024.4      44.61        0.0        0.0        0.0        0.0    53778.2      302.4    17905.2   187375.8     1008.4       21.6      704.1     3764.9      10.71      26.87      43.51      68.54
 CFC-11           2118.0        0.0    35981.3      993.4      43.82        0.0        0.0        0.0        0.0    52821.3      280.9    17203.6   183532.2      988.4       20.0      676.4     3687.9      10.63      26.27      42.72      67.63
 CFC-11           2119.0        0.0    34988.0      963.3      43.05        0.0        0.0        0.0        0.0    51883.3      260.6    16527.0   179861.2      968.8       18.6      649.8     3613.0      10.55      25.67      41.94      66.71
 CFC-11           2120.0        0.0    34024.6      934.3      42.30        0.0        0.0        0.0        0.0    50963.7      241.9    15876.1   176232.3      949.7       17.3      624.1     3540.5      10.47      25.09      41.18      65.81
 
 Species            Year  Prod_mean  Bank_mean  Emis_mean   Mix_mean  Prod_stdv  Prod_2.5p   Prod_50p Prod_97.5p  Bank_stdv  Bank_2.5p   Bank_50p Bank_97.5p  Emis_stdv  Emis_2.5p   Emis_50p Emis_97.5p   Mix_stdv   Mix_2.5p    Mix_50p  Mix_97.5p
 CFC-12           1950.0    34564.0   563104.8    25013.7       5.81     1727.3    31177.8    34564.0    37950.4   833893.7 -1064086.4   558635.9  2210856.8      758.0    23590.9    24990.6    26563.0       0.00       5.81       5.81       5.81
 CFC-12           1951.0    36242.0   572655.0    33858.3       7.00     1811.1    32691.4    36242.0    39792.8   832087.3 -1051043.4   568183.9  2216644.3     1024.4    31934.1    33826.9    35951.8       0.00       7.00       7.00       7.00
 CFC-12           1952.0    37240.0   575038.8    35198.3       8.62     1861.0    33591.6    37240.0    40888.5   830075.1 -1044601.0   570610.5  2215186.5     1067.6    33194.2    35165.6    37379.8       0.00       8.62       8.62       8.62
 CFC-12           1953.0    46493.0   577080.4    39578.4      10.30     2323.4    41938.1    46493.0    51048.1   827995.1 -1038859.6   572741.9  2213241.5     1201.7    37321.9    39541.6    42034.8       0.00      10.30      10.30      10.30
 CFC-12           1954.0    49124.0   583995.0    44796.2      12.18     2454.9    44311.4    49124.0    53936.9   825466.3 -1026788.5   579721.8  2215323.5     1361.2    42239.2    44754.0    47577.9       0.00      12.18      12.18      12.18
 CFC-12           1955.0    57606.0   588322.9    50333.8      14.29     2878.8    51962.4    57606.0    63249.9   822744.3 -1017260.3   584136.0  2214203.3     1530.9    47456.6    50286.6    53462.6       0.00      14.29      14.29      14.29
 CFC-12           1956.0    68674.0   595595.1    58653.3      16.67     3431.9    61946.1    68674.0    75402.3   819585.8 -1003967.4   591410.8  2215174.5     1784.0    55300.6    58598.2    62299.4       0.00      16.67      16.67      16.67
 CFC-12           1957.0    74163.0   605615.8    66674.8      19.44     3706.2    66897.3    74163.0    81429.0   815843.5  -986566.3   601477.9  2217701.8     2029.2    62861.3    66612.4    70822.1       0.00      19.44      19.44      19.44
 CFC-12           1958.0    73437.0   613104.0    69906.4      22.58     3669.9    66242.4    73437.0    80631.9   811746.7  -970889.3   608975.1  2217251.3     2133.1    65896.0    69840.7    74267.8       0.00      22.58      22.58      22.58
 CFC-12           1959.0    87589.0   616634.6    78120.2      25.85     4377.1    79008.0    87589.0    96170.4   807617.3  -959541.8   612570.2  2212675.8     2385.4    73635.3    78047.5    82996.1       0.00      25.85      25.85      25.85
 CFC-12           1960.0    99428.0   626103.4    93060.8      29.50     4968.7    89687.1    99428.0   109169.3   802777.5  -940486.7   622106.4  2212829.5     2838.2    87725.1    92973.7    98865.2       0.00      29.50      29.50      29.50
 CFC-12           1961.0   111499.0   632470.6   104563.8      33.87     5572.0   100575.5   111499.0   122423.0   797219.4  -923176.8   628388.3  2208231.3     3190.9    98564.4   104465.8   111088.2       0.00      33.87      33.87      33.87
 CFC-12           1962.0   133995.0   639405.8   120627.8      38.76     6696.2   120867.6   133995.0   147123.0   790982.4  -904797.4   635153.0  2202773.3     3680.3   113709.3   120514.7   128153.4       0.00      38.76      38.76      38.76
 CFC-12           1963.0   152320.0   652773.0   141701.5      44.41     7611.9   137397.3   152320.0   167243.4   783575.8  -877319.0   648623.2  2201656.3     4320.3   133579.9   141569.0   150540.0       0.00      44.41      44.41      44.41
 CFC-12           1964.0   175997.0   663391.5   164873.8      51.06     8795.2   158754.7   175997.1   193240.1   775091.5  -850411.8   659452.2  2195701.3     5025.2   155427.9   164718.3   175152.2       0.00      51.06      51.06      51.06
 CFC-12           1965.0   195956.0   674514.8   185875.0      58.80     9792.6   176758.4   195956.1   215154.6   765280.0  -820483.4   670761.1  2187677.5     5668.5   175218.7   185701.2   197468.4       0.00      58.80      58.80      58.80
 CFC-12           1966.0   224982.0   684595.8   208500.0      67.51    11243.1   202940.7   224982.1   247024.3   754321.6  -788090.2   681064.0  2176945.0     6362.5   196537.0   208304.7   221509.6       0.00      67.51      67.51      67.51
 CFC-12           1967.0   251563.0   701077.8   235184.8      77.27    12571.4   226917.6   251563.1   276209.6   741826.5  -746759.3   697913.1  2169350.8     7179.9   221684.7   234965.1   249864.8       0.00      77.27      77.27      77.27
 CFC-12           1968.0   276284.0   717456.0   263852.5      88.27    13806.8   249216.7   276284.1   303352.6   727832.8  -703181.4   714310.4  2158591.0     8059.3   248692.9   263607.5   280320.3       0.00      88.27      88.27      88.27
 CFC-12           1969.0   311985.0   729887.6   294365.6     100.59    15590.9   281420.1   311985.1   342551.4   712385.4  -660249.0   726815.6  2140372.5     8997.2   277437.3   294090.2   312761.3       0.00     100.59     100.59     100.59
 CFC-12           1970.0   335799.0   747507.0   321593.8     114.32    16781.0   302901.1   335799.1   368698.5   695019.9  -608807.1   744443.1  2123757.8     9842.1   303075.9   321293.5   341720.2       0.00     114.32     114.32     114.32
 CFC-12           1971.0   362156.0   761712.2   346424.9     129.27    18098.1   326675.9   362156.1   397637.8   676262.2  -557418.5   758898.6  2100901.0    10620.3   326439.8   346098.0   368144.7       0.00     129.27     129.27     129.27
 CFC-12           1972.0   403384.0   777443.3   378254.0     145.32    20158.4   363864.8   403384.1   442905.1   656050.6  -502004.6   774602.1  2076524.6    11609.0   356405.8   377894.9   402003.6       0.00     145.32     145.32     145.32
 CFC-12           1973.0   446838.0   802573.3   418991.9     162.80    22330.0   403061.7   446838.1   490616.4   633703.0  -433181.9   799507.3  2057764.5    12865.0   394777.1   418589.8   445319.0       0.00     162.80     162.80     162.80
 CFC-12           1974.0   472198.0   830419.4   454410.7     182.15    23597.3   425937.2   472198.1   518461.0   609017.3  -355949.0   827547.4  2037110.6    13970.5   428119.6   453976.0   483011.0       0.00     182.15     182.15     182.15
 CFC-12           1975.0   419173.0   848206.7   442451.0     203.08    20947.5   378107.0   419173.1   460241.0   582799.0  -287340.8   845257.6  2003480.8    13692.1   416695.0   442030.2   470455.7       0.00     203.08     203.08     203.08
 CFC-12           1976.0   454829.0   824928.6   431809.8     223.20    22729.3   410269.8   454829.1   499390.3   558787.2  -263375.4   822176.7  1934023.0    13460.4   406494.3   431395.0   459348.1       0.00     223.20     223.20     223.20
 CFC-12           1977.0   435733.0   847947.8   418889.4     242.60    21775.0   393044.6   435733.1   478423.4   533529.3  -191456.2   845652.1  1907882.9    13170.7   394130.3   418487.8   445814.1       0.00     242.60     242.60     242.60
 CFC-12           1978.0   433882.0   864791.4   404445.8     261.17    21682.5   391374.9   433882.1   476391.1   509175.8  -126990.2   862520.6  1875699.5    12845.6   380293.1   404063.8   430715.4       0.00     261.17     261.17     261.17
 CFC-12           1979.0   427759.0   894227.7   425757.5     278.83    21376.5   385851.8   427759.1   469668.2   485089.6   -50501.0   892272.1  1857909.4    13542.1   400296.9   425352.9   453439.2       0.00     278.83     278.83     278.83
 CFC-12           1980.0   432619.0   896229.2   389593.3     297.38    21619.4   390235.7   432619.1   475004.3   460915.7    -1421.7   894375.0  1812713.4    12621.8   365860.5   389226.5   415392.3       0.00     297.38     297.38     297.38
 CFC-12           1981.0   448408.0   939254.9   379637.7     313.95    22408.4   404477.8   448408.1   492340.3   437082.2    88511.6   937160.1  1808559.3    12444.3   356228.4   379283.1   405071.8       0.00     313.95     313.95     313.95
 CFC-12           1982.0   445639.0  1008025.2   401146.2     329.85    22270.1   401980.1   445639.1   489300.0   412838.1   204215.2  1005917.5  1828799.3    13137.7   376435.5   400772.4   427994.4       0.00     329.85     329.85     329.85
 CFC-12           1983.0   457075.0  1052518.0   411492.4     346.68    22841.5   412295.8   457075.1   501856.4   388433.6   296905.2  1050410.8  1825429.5    13528.5   386030.9   411106.9   439142.4       0.00     346.68     346.68     346.68
 CFC-12           1984.0   467995.0  1098100.6   418876.9     363.86    23387.3   422145.9   467995.1   513846.3   363542.7   391335.5  1095909.5  1821636.0    13841.2   392816.3   418483.6   447175.3       0.00     363.86     363.86     363.86
 CFC-12           1985.0   446371.0  1147218.7   436909.6     381.24    22306.6   402640.4   446371.1   490103.7   338278.4   490254.9  1144837.8  1820662.1    14448.1   409704.3   436497.9   466455.6       0.00     381.24     381.24     381.24
 CFC-12           1986.0   481357.0  1156680.1   475018.6     399.35    24055.0   434198.8   481357.1   528517.4   313641.0   547681.9  1154084.3  1781916.6    15611.6   445642.2   474572.4   506922.2       0.00     399.35     399.35     399.35
 CFC-12           1987.0   480018.7  1163018.5   466768.5     419.19    23988.1   432991.7   480018.9   527048.0   287511.1   604907.9  1160765.9  1735701.0    15513.6   437549.9   466332.7   498480.9       0.00     419.19     419.19     419.19
 CFC-12           1988.0   478680.5  1176268.7   509677.2     438.42    23921.2   431784.5   478680.6   525578.6   261877.5   669022.5  1173996.5  1697961.9    16813.8   478021.4   509195.3   544062.0       0.00     438.42     438.42     438.42
 CFC-12           1989.0   477342.2  1145272.0   447565.2     459.61    23854.4   430577.4   477342.3   524109.2   236172.7   687905.5  1143222.4  1615782.5    15279.6   418765.4   447149.3   478751.5       0.00     459.61     459.61     459.61
 CFC-12           1990.0   339135.4  1175048.9   364189.0     477.49    16947.7   305910.6   339135.5   372361.8   212000.5   765111.8  1172976.5  1597424.5    13272.6   339113.7   363858.3   391193.2       0.00     477.49     477.49     477.49
 CFC-12           1991.0   291584.6  1149995.4   288691.8     491.03    14571.4   263018.3   291584.7   320152.3   193197.1   776803.6  1148185.0  1535122.8    11601.5   266690.6   288427.3   312261.9       0.00     491.03     491.03     491.03
 CFC-12           1992.0   270946.2  1152888.2   287026.2     500.66    13540.1   244401.8   270946.3   297491.8   176877.9   811495.9  1151111.5  1505388.8    11664.3   264906.0   286764.2   310730.2       0.00     500.66     500.66     500.66
 CFC-12           1993.0   274465.2  1136808.2   239743.2     510.12    13715.9   247576.1   274465.3   301355.6   161394.6   825703.0  1135308.3  1458295.5    10757.8   219285.8   239524.6   261540.1       0.00     510.12     510.12     510.12
 CFC-12           1994.0   211595.2  1171530.2   234564.9     517.12    10574.1   190865.4   211595.3   232326.0   146815.7   888583.1  1170290.3  1463836.6    10735.3   214133.5   234348.2   256297.0       0.00     517.12     517.12     517.12
 CFC-12           1995.0   156604.4  1148560.5   204509.4     523.80     7826.0   141262.0   156604.5   171947.5   133894.0   890671.1  1147297.4  1415536.4    10243.0   184970.4   204324.1   225191.3       0.00     523.80     523.80     523.80
 CFC-12           1996.0    89668.5  1100655.6   194581.5     528.91     4481.0    80883.8    89668.5    98453.7   122487.8   864824.6  1099573.4  1344882.0    10129.9   175239.1   194395.3   215006.0       0.00     528.91     528.91     528.91
 CFC-12           1997.0    89975.1   995742.6   162664.8     533.47     4496.4    81160.3    89975.1    98790.3   112341.7   779395.9   994745.5  1219025.5     9663.8   144127.9   162503.4   182077.5       0.00     533.47     533.47     533.47
 CFC-12           1998.0    88164.5   923052.9   156872.6     536.39     4405.9    79527.1    88164.5    96802.3   102627.6   725277.0   922182.4  1126908.9     9615.5   138417.6   156717.3   176179.5       0.00     536.39     536.39     536.39
 CFC-12           1999.0    87520.6   854344.7   145790.3     539.00     4373.7    78946.3    87520.6    96095.3    93156.0   674623.3   853650.9  1039349.6     9490.6   127541.1   145641.1   164808.0       0.00     539.00     539.00     539.00
 CFC-12           2000.0    83405.3   796075.0   141540.5     541.02     4168.0    75234.1    83405.3    91576.8    84014.2   633760.4   795529.1   962766.0     9459.7   123350.2   141398.8   160487.7       0.00     541.02     541.02     541.02
 CFC-12           2001.0    65605.0   737939.7   117791.4     542.82     3278.5    59177.8    65605.0    72032.6    75259.0   592059.7   737502.9   887089.4     9182.3   100106.8   117678.0   136161.3       0.00     542.82     542.82     542.82
 CFC-12           2002.0    59191.0   685753.3   108797.8     543.41     2958.0    53392.1    59191.0    64990.1    67240.5   555270.9   685316.9   818959.0     9088.5    91289.4   108693.3   126944.7       0.00     543.41     543.41     543.41
 CFC-12           2003.0    55007.9   636146.6   103743.8     543.54     2748.9    49618.8    55007.9    60397.3    59830.0   519914.6   635841.3   754478.4     9035.9    86329.9   103634.0   121788.3       0.00     543.54     543.54     543.54
 CFC-12           2004.0    47897.8   587410.7    91330.7     543.42     2393.6    43205.3    47897.8    52590.5    53154.4   484033.3   587220.9   692362.9     8910.0    74117.1    91243.8   109101.0       0.00     543.42     543.42     543.42
 CFC-12           2005.0    35983.6   543977.8    88071.7     542.69     1798.2    32458.3    35983.6    39509.1    47500.6   451305.3   543953.3   637431.3     8868.7    70929.4    87988.1   105749.3       0.00     542.69     542.69     542.69
 CFC-12           2006.0    22315.5   491889.8    66198.1     541.79     1115.2    20129.3    22315.5    24501.8    43125.1   407642.7   491922.3   576455.1     8677.5    49371.7    66127.0    83414.4       0.00     541.79     541.79     541.79
 CFC-12           2007.0     9371.7   448007.2    63379.8     539.81      468.3     8453.6     9371.7    10289.9    40361.0   369018.7   448026.2   527143.6     8627.9    46644.7    63309.3    80497.9       0.00     539.81     539.81     539.81
 CFC-12           2008.0     2732.1   393999.0    56007.3     537.72      136.5     2464.5     2732.2     2999.8    39378.9   316797.3   393999.5   471202.7     8548.2    39420.5    55934.1    72958.2       0.00     537.72     537.72     537.72
 CFC-12           2009.0     1366.1   340723.9    49793.2     535.27       68.3     1232.2     1366.1     1499.9    40249.1   261745.8   340706.4   419580.4     5762.4    38788.2    49675.5    61415.1       0.00     535.27     535.27     535.27
 CFC-12           2010.0        0.0   292296.8    42429.9     532.54        0.0        0.0        0.0        0.0    38205.8   218130.2   292071.9   367690.9     4512.1    33735.0    42367.4    51430.0       0.47     531.59     532.54     533.44
 CFC-12           2011.0        0.0   249866.9    36172.5     529.46        0.0        0.0        0.0        0.0    36400.6   179914.5   249397.9   322410.0     3645.1    29080.3    36153.1    43371.8       0.92     527.63     529.47     531.23
 CFC-12           2012.0        0.0   213694.4    30852.4     526.11        0.0        0.0        0.0        0.0    34623.2   147959.7   212907.0   283567.0     3071.3    24810.7    30857.9    36875.5       1.35     523.41     526.12     528.71
 CFC-12           2013.0        0.0   182842.0    26327.0     522.52        0.0        0.0        0.0        0.0    32793.1   121479.6   181811.3   249906.3     2705.0    20941.7    26348.8    31574.5       1.77     518.99     522.54     525.94
 CFC-12           2014.0        0.0   156515.0    22475.8     518.74        0.0        0.0        0.0        0.0    30897.3    99607.9   155263.1   220407.7     2470.3    17500.5    22516.1    27221.7       2.19     514.40     518.76     522.97
 CFC-12           2015.0        0.0   134039.2    19196.7     514.80        0.0        0.0        0.0        0.0    28954.1    81529.4   132593.3   194658.8     2309.0    14522.4    19249.4    23591.2       2.59     509.68     514.82     519.83
 CFC-12           2016.0        0.0   114842.5    16403.6     510.74        0.0        0.0        0.0        0.0    26992.9    66682.4   113240.3   172002.1     2182.9    11980.9    16453.8    20542.1       2.99     504.83     510.76     516.56
 CFC-12           2017.0        0.0    98438.9    14023.2     506.58        0.0        0.0        0.0        0.0    25044.5    54485.9    96702.5   152125.8     2070.4     9853.4    14064.6    17953.9       3.39     499.90     506.60     513.18
 CFC-12           2018.0        0.0    84415.7    11993.6     502.35        0.0        0.0        0.0        0.0    23136.3    44528.2    82598.5   134667.9     1960.9     8094.2    12017.5    15747.4       3.78     494.91     502.36     509.70
 CFC-12           2019.0        0.0    72422.1    10262.4     498.05        0.0        0.0        0.0        0.0    21290.8    36398.8    70531.1   119238.1     1850.1     6629.9    10268.8    13853.4       4.16     489.87     498.06     506.17
 CFC-12           2020.0        0.0    62159.7     8785.0     493.70        0.0        0.0        0.0        0.0    19524.9    29734.1    60243.0   105644.5     1737.4     5428.8     8774.0    12202.2       4.53     484.81     493.72     502.56
 CFC-12           2021.0        0.0    53374.7     7523.6     489.33        0.0        0.0        0.0        0.0    17850.5    24278.7    51447.7    93632.3     1623.4     4436.0     7496.4    10766.2       4.89     479.73     489.34     498.91
 CFC-12           2022.0        0.0    45851.1     6446.2     484.94        0.0        0.0        0.0        0.0    16275.2    19823.6    43936.3    82948.8     1509.8     3625.3     6403.5     9503.3       5.25     474.65     484.94     495.23
 CFC-12           2023.0        0.0    39404.9     5525.4     480.53        0.0        0.0        0.0        0.0    14803.0    16174.3    37528.5    73515.5     1397.8     2965.2     5469.5     8396.4       5.60     469.59     480.54     491.52
 CFC-12           2024.0        0.0    33879.5     4738.3     476.13        0.0        0.0        0.0        0.0    13435.1    13185.4    32054.6    65155.2     1289.0     2422.3     4672.8     7425.1       5.93     464.53     476.12     487.79
 CFC-12           2025.0        0.0    29141.2     4065.0     471.72        0.0        0.0        0.0        0.0    12170.3    10757.9    27377.2    57753.5     1184.3     1978.6     3990.5     6571.3       6.27     459.50     471.72     484.05
 CFC-12           2026.0        0.0    25076.2     3488.9     467.33        0.0        0.0        0.0        0.0    11005.8     8779.1    23382.7    51192.8     1084.5     1615.9     3408.8     5819.0       6.59     454.49     467.32     480.30
 CFC-12           2027.0        0.0    21587.3     2995.7     462.95        0.0        0.0        0.0        0.0     9937.7     7163.3    19970.9    45370.0      990.2     1318.9     2911.4     5155.6       6.90     449.51     462.93     476.57
 CFC-12           2028.0        0.0    18591.5     2573.4     458.59        0.0        0.0        0.0        0.0     8961.2     5842.7    17058.8    40236.1      901.8     1075.7     2486.7     4568.0       7.21     444.56     458.57     472.82
 CFC-12           2029.0        0.0    16018.2     2211.5     454.25        0.0        0.0        0.0        0.0     8071.0     4767.5    14571.3    35671.3      819.4      877.3     2124.3     4048.5       7.51     439.65     454.22     469.08
 CFC-12           2030.0        0.0    13806.7     1901.3     449.93        0.0        0.0        0.0        0.0     7261.5     3885.2    12440.2    31626.9      743.0      716.0     1814.5     3587.2       7.80     434.79     449.90     465.36
 CFC-12           2031.0        0.0    11905.4     1635.3     445.65        0.0        0.0        0.0        0.0     6527.0     3166.2    10625.5    28052.2      672.4      584.1     1549.8     3179.7       8.08     429.97     445.60     461.64
 CFC-12           2032.0        0.0    10270.2     1407.1     441.39        0.0        0.0        0.0        0.0     5861.8     2582.2     9074.8    24864.6      607.6      476.7     1323.8     2818.5       8.35     425.19     441.34     457.94
 CFC-12           2033.0        0.0     8863.1     1211.2     437.16        0.0        0.0        0.0        0.0     5260.5     2104.6     7748.0    22062.1      548.2      388.8     1130.6     2498.2       8.62     420.45     437.10     454.25
 CFC-12           2034.0        0.0     7651.9     1043.0     432.96        0.0        0.0        0.0        0.0     4717.8     1714.6     6617.1    19583.1      493.9      317.1      965.8     2214.9       8.88     415.75     432.90     450.58
 CFC-12           2035.0        0.0     6608.9      898.6     428.79        0.0        0.0        0.0        0.0     4228.6     1398.6     5649.7    17381.4      444.6      258.3      824.9     1963.3       9.14     411.11     428.73     446.93
 CFC-12           2036.0        0.0     5710.3      774.4     424.66        0.0        0.0        0.0        0.0     3788.1     1140.1     4824.3    15415.8      399.7      210.7      704.4     1741.0       9.39     406.51     424.59     443.31
 CFC-12           2037.0        0.0     4935.9      667.7     420.57        0.0        0.0        0.0        0.0     3392.1      929.7     4119.4    13677.9      359.0      171.7      601.6     1543.3       9.63     401.97     420.49     439.71
 CFC-12           2038.0        0.0     4268.1      575.9     416.50        0.0        0.0        0.0        0.0     3036.2      757.8     3518.7    12139.1      322.2      139.9      513.8     1368.7       9.87     397.46     416.42     436.13
 CFC-12           2039.0        0.0     3692.2      497.0     412.48        0.0        0.0        0.0        0.0     2716.8      617.4     3005.3    10769.8      289.0      114.1      438.7     1213.9      10.10     393.01     412.39     432.57
 CFC-12           2040.0        0.0     3195.2      429.0     408.49        0.0        0.0        0.0        0.0     2430.2      502.9     2566.4     9555.3      259.0       93.0      374.7     1076.2      10.32     388.59     408.39     429.03
 CFC-12           2041.0        0.0     2766.2      370.5     404.53        0.0        0.0        0.0        0.0     2173.4      409.7     2192.3     8479.0      232.0       75.8      319.9      954.8      10.54     384.24     404.42     425.52
 CFC-12           2042.0        0.0     2395.7      320.1     400.61        0.0        0.0        0.0        0.0     1943.2      333.9     1872.2     7522.0      207.7       61.8      273.2      847.7      10.75     379.92     400.49     422.05
 CFC-12           2043.0        0.0     2075.6      276.6     396.73        0.0        0.0        0.0        0.0     1737.2      272.1     1598.5     6673.3      185.9       50.4      233.3      752.4      10.96     375.65     396.60     418.59
 CFC-12           2044.0        0.0     1799.0      239.2     392.88        0.0        0.0        0.0        0.0     1552.8      221.8     1365.4     5920.0      166.3       41.0      199.3      667.3      11.16     371.43     392.75     415.15
 CFC-12           2045.0        0.0     1559.9      206.9     389.07        0.0        0.0        0.0        0.0     1387.8      180.7     1166.1     5252.5      148.7       33.4      170.2      592.1      11.36     367.25     388.93     411.75
 CFC-12           2046.0        0.0     1353.0      179.0     385.29        0.0        0.0        0.0        0.0     1240.3      147.3      995.9     4660.7      132.9       27.3      145.3      525.5      11.55     363.12     385.15     408.38
 CFC-12           2047.0        0.0     1174.0      154.9     381.55        0.0        0.0        0.0        0.0     1108.4      120.1      850.5     4137.4      118.8       22.2      124.1      466.1      11.74     359.03     381.40     405.02
 CFC-12           2048.0        0.0     1019.1      134.1     377.84        0.0        0.0        0.0        0.0      990.5       97.9      726.2     3670.3      106.2       18.1      106.0      413.7      11.92     354.98     377.68     401.69
 CFC-12           2049.0        0.0      885.0      116.2     374.17        0.0        0.0        0.0        0.0      885.1       79.7      620.1     3255.2       94.9       14.8       90.5      367.0      12.10     350.99     374.01     398.39
 CFC-12           2050.0        0.0      768.7      100.7     370.54        0.0        0.0        0.0        0.0      791.0       64.9      529.6     2889.1       84.7       12.0       77.3      325.7      12.27     347.04     370.37     395.11
 CFC-12           2051.0        0.0      668.0       87.3     366.94        0.0        0.0        0.0        0.0      706.9       52.9      452.1     2564.5       75.7        9.8       66.0      288.9      12.44     343.13     366.76     391.86
 CFC-12           2052.0        0.0      580.7       75.7     363.37        0.0        0.0        0.0        0.0      631.8       43.1      386.2     2275.5       67.6        8.0       56.4      256.3      12.60     339.27     363.19     388.63
 CFC-12           2053.0        0.0      505.0       65.7     359.84        0.0        0.0        0.0        0.0      564.7       35.1      329.7     2019.0       60.4        6.5       48.2      227.4      12.76     335.45     359.65     385.43
 CFC-12           2054.0        0.0      439.4       57.0     356.34        0.0        0.0        0.0        0.0      504.7       28.6      281.6     1791.0       53.9        5.3       41.1      201.8      12.92     331.68     356.15     382.26
 CFC-12           2055.0        0.0      382.4       49.5     352.88        0.0        0.0        0.0        0.0      451.2       23.3      240.6     1589.8       48.2        4.3       35.1      179.1      13.07     327.94     352.67     379.11
 CFC-12           2056.0        0.0      332.9       43.0     349.45        0.0        0.0        0.0        0.0      403.4       19.0      205.4     1411.2       43.0        3.5       30.0      158.9      13.21     324.24     349.23     375.99
 CFC-12           2057.0        0.0      289.9       37.3     346.05        0.0        0.0        0.0        0.0      360.8       15.5      175.4     1252.1       38.4        2.9       25.6      140.9      13.36     320.59     345.83     372.89
 CFC-12           2058.0        0.0      252.6       32.5     342.69        0.0        0.0        0.0        0.0      322.6       12.6      149.9     1111.1       34.3        2.3       21.9      125.1      13.50     316.97     342.46     369.82
 CFC-12           2059.0        0.0      220.1       28.2     339.36        0.0        0.0        0.0        0.0      288.6       10.3      128.0      986.9       30.6        1.9       18.7      111.0      13.63     313.40     339.12     366.78
 CFC-12           2060.0        0.0      191.9       24.5     336.06        0.0        0.0        0.0        0.0      258.2        8.4      109.3      875.7       27.4        1.6       15.9       98.5      13.76     309.88     335.82     363.75
 CFC-12           2061.0        0.0      167.4       21.4     332.79        0.0        0.0        0.0        0.0      231.0        6.8       93.4      777.0       24.5        1.3       13.6       87.4      13.89     306.38     332.54     360.76
 CFC-12           2062.0        0.0      146.0       18.6     329.56        0.0        0.0        0.0        0.0      206.7        5.6       79.7      690.1       21.8        1.0       11.6       77.6      14.01     302.93     329.30     357.79
 CFC-12           2063.0        0.0      127.4       16.2     326.35        0.0        0.0        0.0        0.0      185.0        4.5       68.1      612.7       19.5        0.8        9.9       68.8      14.13     299.51     326.09     354.84
 CFC-12           2064.0        0.0      111.3       14.1     323.18        0.0        0.0        0.0        0.0      165.7        3.7       58.1      543.8       17.4        0.7        8.5       61.1      14.25     296.14     322.91     351.92
 CFC-12           2065.0        0.0       97.2       12.3     320.04        0.0        0.0        0.0        0.0      148.3        3.0       49.7      482.7       15.6        0.6        7.2       54.2      14.36     292.79     319.76     349.02
 CFC-12           2066.0        0.0       84.9       10.7     316.93        0.0        0.0        0.0        0.0      132.9        2.4       42.4      428.3       13.9        0.5        6.2       48.1      14.47     289.50     316.65     346.15
 CFC-12           2067.0        0.0       74.2        9.3     313.85        0.0        0.0        0.0        0.0      119.0        2.0       36.2      380.2       12.5        0.4        5.3       42.7      14.57     286.24     313.56     343.29
 CFC-12           2068.0        0.0       64.9        8.1     310.80        0.0        0.0        0.0        0.0      106.7        1.6       30.9      337.4       11.1        0.3        4.5       37.9      14.67     283.01     310.50     340.46
 CFC-12           2069.0        0.0       56.7        7.1     307.78        0.0        0.0        0.0        0.0       95.6        1.3       26.4      299.5       10.0        0.2        3.9       33.6      14.77     279.82     307.47     337.65
 CFC-12           2070.0        0.0       49.6        6.2     304.79        0.0        0.0        0.0        0.0       85.7        1.1       22.6      265.7        8.9        0.2        3.3       29.9      14.87     276.66     304.47     334.87
 CFC-12           2071.0        0.0       43.4        5.4     301.83        0.0        0.0        0.0        0.0       76.8        0.9       19.3      235.8        8.0        0.2        2.8       26.5      14.96     273.54     301.50     332.11
 CFC-12           2072.0        0.0       38.0        4.7     298.89        0.0        0.0        0.0        0.0       68.9        0.7       16.4      209.3        7.1        0.1        2.4       23.5      15.05     270.45     298.56     329.37
 CFC-12           2073.0        0.0       33.3        4.1     295.99        0.0        0.0        0.0        0.0       61.8        0.6       14.0      185.8        6.4        0.1        2.1       20.9      15.13     267.40     295.65     326.66
 CFC-12           2074.0        0.0       29.2        3.6     293.12        0.0        0.0        0.0        0.0       55.5        0.5       12.0      164.9        5.7        0.1        1.8       18.5      15.22     264.40     292.76     323.97
 CFC-12           2075.0        0.0       25.6        3.2     290.27        0.0        0.0        0.0        0.0       49.8        0.4       10.2      146.4        5.1        0.1        1.5       16.5      15.30     261.42     289.91     321.29
 CFC-12           2076.0        0.0       22.4        2.8     287.45        0.0        0.0        0.0        0.0       44.7        0.3        8.7      130.0        4.6        0.1        1.3       14.6      15.37     258.47     287.08     318.64
 CFC-12           2077.0        0.0       19.6        2.4     284.66        0.0        0.0        0.0        0.0       40.1        0.3        7.5      115.4        4.1        0.0        1.1       13.0      15.45     255.56     284.28     316.02
 CFC-12           2078.0        0.0       17.2        2.1     281.89        0.0        0.0        0.0        0.0       36.1        0.2        6.4      102.4        3.7        0.0        0.9       11.5      15.52     252.68     281.51     313.41
 CFC-12           2079.0        0.0       15.1        1.8     279.15        0.0        0.0        0.0        0.0       32.4        0.2        5.4       90.9        3.3        0.0        0.8       10.2      15.59     249.83     278.77     310.82
 CFC-12           2080.0        0.0       13.3        1.6     276.44        0.0        0.0        0.0        0.0       29.1        0.1        4.7       80.6        3.0        0.0        0.7        9.1      15.65     247.01     276.05     308.26
 CFC-12           2081.0        0.0       11.6        1.4     273.76        0.0        0.0        0.0        0.0       26.2        0.1        4.0       71.5        2.7        0.0        0.6        8.0      15.72     244.22     273.35     305.72
 CFC-12           2082.0        0.0       10.2        1.2     271.10        0.0        0.0        0.0        0.0       23.5        0.1        3.4       63.5        2.4        0.0        0.5        7.1      15.78     241.46     270.68     303.21
 CFC-12           2083.0        0.0        9.0        1.1     268.47        0.0        0.0        0.0        0.0       21.2        0.1        2.9       56.3        2.1        0.0        0.4        6.3      15.83     238.74     268.04     300.71
 CFC-12           2084.0        0.0        7.9        1.0     265.86        0.0        0.0        0.0        0.0       19.0        0.1        2.5       50.0        1.9        0.0        0.4        5.6      15.89     236.05     265.43     298.23
 CFC-12           2085.0        0.0        6.9        0.8     263.28        0.0        0.0        0.0        0.0       17.1        0.1        2.1       44.3        1.7        0.0        0.3        5.0      15.94     233.39     262.84     295.76
 CFC-12           2086.0        0.0        6.1        0.7     260.72        0.0        0.0        0.0        0.0       15.4        0.0        1.8       39.4        1.5        0.0        0.3        4.4      15.99     230.76     260.28     293.33
 CFC-12           2087.0        0.0        5.4        0.6     258.19        0.0        0.0        0.0        0.0       13.9        0.0        1.5       34.9        1.4        0.0        0.2        3.9      16.04     228.15     257.74     290.92
 CFC-12           2088.0        0.0        4.7        0.6     255.68        0.0        0.0        0.0        0.0       12.5        0.0        1.3       31.0        1.2        0.0        0.2        3.5      16.08     225.58     255.23     288.51
 CFC-12           2089.0        0.0        4.2        0.5     253.20        0.0        0.0        0.0        0.0       11.3        0.0        1.1       27.5        1.1        0.0        0.2        3.1      16.13     223.03     252.74     286.13
 CFC-12           2090.0        0.0        3.7        0.4     250.74        0.0        0.0        0.0        0.0       10.2        0.0        1.0       24.4        1.0        0.0        0.1        2.7      16.17     220.52     250.27     283.78
 CFC-12           2091.0        0.0        3.2        0.4     248.31        0.0        0.0        0.0        0.0        9.2        0.0        0.8       21.7        0.9        0.0        0.1        2.4      16.20     218.03     247.83     281.45
 CFC-12           2092.0        0.0        2.8        0.3     245.90        0.0        0.0        0.0        0.0        8.3        0.0        0.7       19.2        0.8        0.0        0.1        2.2      16.24     215.57     245.41     279.14
 CFC-12           2093.0        0.0        2.5        0.3     243.51        0.0        0.0        0.0        0.0        7.4        0.0        0.6       17.1        0.7        0.0        0.1        1.9      16.27     213.14     243.02     276.83
 CFC-12           2094.0        0.0        2.2        0.3     241.15        0.0        0.0        0.0        0.0        6.7        0.0        0.5       15.2        0.7        0.0        0.1        1.7      16.31     210.74     240.64     274.55
 CFC-12           2095.0        0.0        1.9        0.2     238.81        0.0        0.0        0.0        0.0        6.1        0.0        0.4       13.4        0.6        0.0        0.1        1.5      16.34     208.37     238.30     272.29
 CFC-12           2096.0        0.0        1.7        0.2     236.49        0.0        0.0        0.0        0.0        5.5        0.0        0.4       11.9        0.5        0.0        0.1        1.3      16.36     206.02     235.97     270.04
 CFC-12           2097.0        0.0        1.5        0.2     234.20        0.0        0.0        0.0        0.0        4.9        0.0        0.3       10.6        0.5        0.0        0.0        1.2      16.39     203.69     233.67     267.81
 CFC-12           2098.0        0.0        1.3        0.2     231.93        0.0        0.0        0.0        0.0        4.5        0.0        0.3        9.4        0.4        0.0        0.0        1.1      16.41     201.40     231.39     265.61
 CFC-12           2099.0        0.0        1.2        0.1     229.68        0.0        0.0        0.0        0.0        4.0        0.0        0.2        8.3        0.4        0.0        0.0        0.9      16.43     199.12     229.13     263.42
 CFC-12           2100.0        0.0        1.0        0.1     227.45        0.0        0.0        0.0        0.0        3.6        0.0        0.2        7.4        0.4        0.0        0.0        0.8      16.45     196.88     226.90     261.25
 CFC-12           2101.0        0.0        0.9        0.1     225.24        0.0        0.0        0.0        0.0        3.3        0.0        0.2        6.6        0.3        0.0        0.0        0.7      16.47     194.66     224.69     259.09
 CFC-12           2102.0        0.0        0.8        0.1     223.06        0.0        0.0        0.0        0.0        3.0        0.0        0.1        5.8        0.3        0.0        0.0        0.7      16.49     192.46     222.50     256.96
 CFC-12           2103.0        0.0        0.7        0.1     220.90        0.0        0.0        0.0        0.0        2.7        0.0        0.1        5.2        0.3        0.0        0.0        0.6      16.50     190.29     220.33     254.85
 CFC-12           2104.0        0.0        0.6        0.1     218.75        0.0        0.0        0.0        0.0        2.4        0.0        0.1        4.6        0.2        0.0        0.0        0.5      16.51     188.14     218.18     252.74
 CFC-12           2105.0        0.0        0.6        0.1     216.63        0.0        0.0        0.0        0.0        2.2        0.0        0.1        4.1        0.2        0.0        0.0        0.5      16.52     186.02     216.05     250.66
 CFC-12           2106.0        0.0        0.5        0.1     214.53        0.0        0.0        0.0        0.0        2.0        0.0        0.1        3.6        0.2        0.0        0.0        0.4      16.53     183.92     213.94     248.60
 CFC-12           2107.0        0.0        0.4        0.1     212.45        0.0        0.0        0.0        0.0        1.8        0.0        0.1        3.2        0.2        0.0        0.0        0.4      16.54     181.85     211.85     246.55
 CFC-12           2108.0        0.0        0.4        0.0     210.39        0.0        0.0        0.0        0.0        1.6        0.0        0.1        2.8        0.2        0.0        0.0        0.3      16.54     179.80     209.79     244.52
 CFC-12           2109.0        0.0        0.3        0.0     208.35        0.0        0.0        0.0        0.0        1.5        0.0        0.0        2.5        0.1        0.0        0.0        0.3      16.55     177.77     207.74     242.51
 CFC-12           2110.0        0.0        0.3        0.0     206.33        0.0        0.0        0.0        0.0        1.3        0.0        0.0        2.2        0.1        0.0        0.0        0.3      16.55     175.76     205.72     240.51
 CFC-12           2111.0        0.0        0.3        0.0     204.33        0.0        0.0        0.0        0.0        1.2        0.0        0.0        2.0        0.1        0.0        0.0        0.2      16.55     173.78     203.71     238.53
 CFC-12           2112.0        0.0        0.2        0.0     202.35        0.0        0.0        0.0        0.0        1.1        0.0        0.0        1.8        0.1        0.0        0.0        0.2      16.55     171.82     201.72     236.57
 CFC-12           2113.0        0.0        0.2        0.0     200.39        0.0        0.0        0.0        0.0        1.0        0.0        0.0        1.6        0.1        0.0        0.0        0.2      16.55     169.88     199.75     234.62
 CFC-12           2114.0        0.0        0.2        0.0     198.45        0.0        0.0        0.0        0.0        0.9        0.0        0.0        1.4        0.1        0.0        0.0        0.2      16.54     167.97     197.80     232.68
 CFC-12           2115.0        0.0        0.2        0.0     196.53        0.0        0.0        0.0        0.0        0.8        0.0        0.0        1.2        0.1        0.0        0.0        0.1      16.54     166.07     195.88     230.77
 CFC-12           2116.0        0.0        0.1        0.0     194.62        0.0        0.0        0.0        0.0        0.7        0.0        0.0        1.1        0.1        0.0        0.0        0.1      16.53     164.20     193.96     228.87
 CFC-12           2117.0        0.0        0.1        0.0     192.74        0.0        0.0        0.0        0.0        0.7        0.0        0.0        1.0        0.1        0.0        0.0        0.1      16.52     162.35     192.07     226.98
 CFC-12           2118.0        0.0        0.1        0.0     190.87        0.0        0.0        0.0        0.0        0.6        0.0        0.0        0.9        0.1        0.0        0.0        0.1      16.51     160.52     190.20     225.11
 CFC-12           2119.0        0.0        0.1        0.0     189.02        0.0        0.0        0.0        0.0        0.6        0.0        0.0        0.8        0.1        0.0        0.0        0.1      16.50     158.71     188.34     223.25
 CFC-12           2120.0        0.0        0.1        0.0     187.19        0.0        0.0        0.0        0.0        0.5        0.0        0.0        0.7        0.0        0.0        0.0        0.1      16.49     156.92     186.51     221.42
 
 Species            Year  Prod_mean  Bank_mean  Emis_mean   Mix_mean  Prod_stdv  Prod_2.5p   Prod_50p Prod_97.5p  Bank_stdv  Bank_2.5p   Bank_50p Bank_97.5p  Emis_stdv  Emis_2.5p   Emis_50p Emis_97.5p   Mix_stdv   Mix_2.5p    Mix_50p  Mix_97.5p
 CFC-113          1950.0     1800.0     7219.3    25119.6       0.19       90.0     1623.7     1800.0     1976.4   182888.6  -348918.6     6961.9   367231.2      755.3    23703.0    25097.0    26664.8       0.00       0.19       0.19       0.19
 CFC-113          1951.0     2000.0   -16100.3     1859.1       1.00       99.9     1804.1     2000.0     2195.9   182433.9  -371378.3   -16361.4   343007.8       60.6     1744.7     1857.4     1983.0       0.00       1.00       1.00       1.00
 CFC-113          1952.0     2300.0   -15959.4     2106.9       1.05      114.9     2074.7     2300.0     2525.3   182317.1  -371004.5   -16221.6   342944.6       68.0     1978.7     2105.0     2245.9       0.00       1.05       1.05       1.05
 CFC-113          1953.0     2600.0   -15766.3     2403.1       1.11      129.9     2345.3     2600.0     2854.7   182183.8  -370544.6   -16028.4   342897.3       76.8     2258.2     2400.9     2560.2       0.00       1.11       1.11       1.11
 CFC-113          1954.0     3000.0   -15569.4     2749.7       1.17      149.9     2706.1     3000.0     3293.9   182033.2  -370045.0   -15828.1   342784.7       87.2     2585.4     2747.2     2928.0       0.00       1.17       1.17       1.17
 CFC-113          1955.0     3500.0   -15319.1     3195.7       1.25      174.9     3157.1     3500.0     3842.9   181860.4  -369446.2   -15578.3   342678.6      100.5     3006.5     3192.8     3401.4       0.00       1.25       1.25       1.25
 CFC-113          1956.0     4000.0   -15014.8     3689.7       1.34      199.9     3608.1     4000.0     4391.9   181659.6  -368750.8   -15265.7   342568.5      115.3     3472.6     3686.3     3925.7       0.00       1.34       1.34       1.34
 CFC-113          1957.0     4500.0   -14704.5     4183.6       1.44      224.9     4059.1     4500.0     4940.9   181430.1  -368020.7   -14950.6   342407.5      130.3     3938.4     4179.9     4450.3       0.00       1.44       1.44       1.44
 CFC-113          1958.0     5200.0   -14388.1     4777.4       1.56      259.9     4690.6     5200.0     5709.5   181171.7  -367247.2   -14640.8   342195.4      148.3     4498.4     4773.1     5080.9       0.00       1.56       1.56       1.56
 CFC-113          1959.0     6000.0   -13965.6     5519.9       1.70      299.8     5412.2     6000.0     6587.8   180874.5  -366260.6   -14217.0   342038.3      170.8     5198.7     5514.9     5869.3       0.00       1.70       1.70       1.70
 CFC-113          1960.0     6850.0   -13485.4     6310.7       1.86      342.3     6178.9     6850.0     7521.1   180532.1  -365099.7   -13736.2   341836.5      194.8     5944.3     6304.9     6709.2       0.00       1.86       1.86       1.86
 CFC-113          1961.0     7800.0   -12946.2     7151.4       2.04      389.8     7035.8     7800.0     8564.2   180141.5  -363820.3   -13192.0   341653.8      220.4     6737.0     7144.8     7602.2       0.00       2.04       2.04       2.04
 CFC-113          1962.0     9000.0   -12297.6     8181.9       2.25      449.8     8118.3     9000.0     9881.8   179697.7  -362271.4   -12544.1   341422.4      251.7     7708.9     8174.4     8696.9       0.00       2.25       2.25       2.25
 CFC-113          1963.0    10300.0   -11479.5     9402.7       2.49      514.7     9290.9    10300.0    11309.1   179187.3  -360452.1   -11728.8   341253.3      288.8     8860.1     9394.0     9993.7       0.00       2.49       2.49       2.49
 CFC-113          1964.0    11800.0   -10582.1    10770.9       2.77      589.7    10643.9    11800.0    12956.1   178603.1  -358382.8   -10818.0   340968.6      330.5    10150.2    10760.9    11447.1       0.00       2.77       2.77       2.77
 CFC-113          1965.0    13500.0    -9553.1    12335.2       3.08      674.6    12177.4    13500.0    14822.6   177934.3  -356029.8    -9800.4   340714.8      378.1    11625.2    12323.8    13108.9       0.00       3.08       3.08       3.08
 CFC-113          1966.0    15500.0    -8388.3    14144.8       3.45      774.6    13981.4    15500.0    17018.6   177169.5  -353387.1    -8612.4   340468.6      433.2    13331.2    14131.7    15031.1       0.00       3.45       3.45       3.45
 CFC-113          1967.0    17700.0    -7033.1    16199.6       3.87      884.5    15965.9    17700.0    19434.1   176292.3  -350307.1    -7246.2   340080.1      495.7    15268.1    16184.5    17213.9       0.00       3.87       3.87       3.87
 CFC-113          1968.0    20300.0    -5532.7    18550.3       4.35     1014.5    18311.2    20300.0    22288.9   175290.4  -346899.3    -5741.6   339537.7      567.3    17484.2    18533.1    19711.4       0.00       4.35       4.35       4.35
 CFC-113          1969.0    23200.0    -3783.0    21244.4       4.90     1159.4    20927.1    23200.0    25473.0   174142.5  -342859.8    -4015.4   339017.2      649.4    20024.0    21224.8    22573.6       0.00       4.90       4.90       4.90
 CFC-113          1970.0    26600.0    -1827.4    24332.2       5.53     1329.3    23994.0    26600.0    29206.1   172830.6  -338327.3    -2048.0   338446.8      743.4    22935.0    24309.7    25853.8       0.00       5.53       5.53       5.53
 CFC-113          1971.0    30500.0      440.4    27910.8       6.26     1524.2    27511.9    30500.0    33488.2   171327.6  -333088.2      221.0   337739.0      852.4    26308.7    27885.2    29655.5       0.00       6.26       6.26       6.26
 CFC-113          1972.0    35000.0     3029.5    32029.1       7.09     1749.1    31571.0    35000.0    38429.1   169605.1  -327110.2     2812.3   336939.3      977.8    30191.6    31999.7    34030.5       0.00       7.09       7.09       7.09
 CFC-113          1973.0    40000.0     6000.4    36684.9       8.05     1998.9    36081.2    40000.0    43918.9   167629.6  -320259.2     5767.7   336080.6     1119.6    34580.8    36651.2    38976.3       0.00       8.05       8.05       8.05
 CFC-113          1974.0    45900.0     9315.5    42027.6       9.14     2293.8    41403.1    45900.0    50397.0   165371.9  -312588.1     9063.7   334913.3     1282.4    39618.0    41989.1    44652.0       0.00       9.14       9.14       9.14
 CFC-113          1975.0    52600.0    13187.9    48201.4      10.40     2628.6    47446.7    52600.0    57753.4   162784.1  -303678.3    12921.7   333665.8     1470.4    45438.4    48157.3    51210.7       0.00      10.40      10.40      10.40
 CFC-113          1976.0    60200.0    17586.5    55206.6      11.84     3008.4    54302.1    60200.0    66098.0   159820.1  -293515.7    17347.4   332278.7     1683.9    52041.9    55156.0    58652.4       0.00      11.84      11.84      11.84
 CFC-113          1977.0    69000.0    22579.9    63239.7      13.49     3448.2    62240.0    69000.0    75760.2   156430.1  -281957.9    22289.1   330667.0     1928.6    59614.6    63181.5    67186.0       0.00      13.49      13.49      13.49
 CFC-113          1978.0    79000.0    28340.2    41808.3      15.39     3947.9    71260.3    79000.0    86739.9   152549.0  -268401.2    28055.0   328830.5     1308.5    39345.8    41770.0    44486.0       0.00      15.39      15.39      15.39
 CFC-113          1979.0    90500.0    65531.9    81263.5      16.57     4522.6    81633.6    90500.0    99366.6   148574.4  -223578.1    65273.2   358295.9     2475.3    76613.0    81189.4    86328.3       0.00      16.57      16.57      16.57
 CFC-113          1980.0   103667.0    74768.4    82325.1      19.01     5180.6    93510.6   103667.0   113823.6   143529.7  -204474.6    74511.0   357778.5     2516.5    77595.7    82248.8    87476.0       0.00      19.01      19.01      19.01
 CFC-113          1981.0   108536.0    96110.3   125526.1      21.46     5423.9    97902.6   108536.1   119169.7   137926.2  -171978.3    95832.7   368014.4     3809.4   118368.7   125410.7   133315.8       0.00      21.46      21.46      21.46
 CFC-113          1982.0   112987.0    79120.2   131272.0      25.28     5646.3   101917.5   112987.1   124056.7   131462.0  -176296.5    78874.0   338217.6     3993.2   123769.2   131153.0   139442.1       0.00      25.28      25.28      25.28
 CFC-113          1983.0   132743.0    60835.1   110991.9      29.24     6633.6   119738.0   132743.1   145748.3   124722.5  -181509.6    60570.2   306674.9     3408.8   104589.2   110888.6   117966.3       0.00      29.24      29.24      29.24
 CFC-113          1984.0   171122.0    82586.3   160252.2      32.50     8551.5   154357.0   171122.1   187887.4   117484.7  -145514.8    82242.3   314424.6     4880.7   151080.7   160106.9   170239.5       0.00      32.50      32.50      32.50
 CFC-113          1985.0   187011.0    93456.0   159013.7      37.32     9345.6   168689.3   187011.1   205333.1   107980.7  -116131.8    93113.0   306846.2     4863.2   149874.7   158865.9   168967.1       0.00      37.32      37.32      37.32
 CFC-113          1986.0   220687.0   121453.4   181016.9      42.05    11028.5   199066.1   220687.1   242308.5    97903.5   -68287.0   121028.7   315120.5     5534.3   170615.1   180849.6   192345.3       0.00      42.05      42.05      42.05
 CFC-113          1987.0   226914.3   161123.5   233413.2      47.43    11339.7   204683.3   226914.4   249145.9    86277.2    -5970.8   160758.3   332088.7     7109.3   220053.9   233201.3   247960.0       0.00      47.43      47.43      47.43
 CFC-113          1988.0   233141.7   154624.6   229740.0      54.44    11650.9   210300.5   233141.8   255983.4    73802.7    11969.8   154185.3   300972.3     7028.5   216533.4   229527.0   244121.4       0.00      54.44      54.44      54.44
 CFC-113          1989.0   239369.0   158026.2   218087.2      61.27    11962.1   215917.8   239369.1   262820.8    61471.5    39713.8   157490.8   280277.7     6716.6   205465.0   217884.2   231820.4       0.00      61.27      61.27      61.27
 CFC-113          1990.0   196121.0   179308.1   213502.2      67.64     9800.8   176906.8   196121.1   215335.7    49691.5    84316.9   178501.4   278860.3     6616.1   201055.9   213310.0   227045.6       0.00      67.64      67.64      67.64
 CFC-113          1991.0   150900.0   161926.8   177107.2      73.80     7541.0   136116.2   150900.1   165684.2    40212.7    85902.7   161031.3   243162.5     5601.6   166553.7   176945.8   188564.6       0.00      73.80      73.80      73.80
 CFC-113          1992.0   111447.0   135719.7   116631.6      78.72     5569.4   100528.4   111447.1   122365.9    33387.0    73427.0   134575.0   203944.3     3961.3   109135.4   116522.3   124709.3       0.00      78.72      78.72      78.72
 CFC-113          1993.0    55874.0   130535.1    68167.2      81.63     2792.2    50400.0    55874.0    61348.2    28879.2    77406.6   129243.0   190113.0     2795.9    62863.4    68099.9    73850.8       0.00      81.63      81.63      81.63
 CFC-113          1994.0    23700.7   118241.8    47110.7      82.96     1184.4    21378.7    23700.7    26022.7    26007.9    70838.5   116912.6   172185.6     2392.9    42530.4    47060.3    51952.9       0.00      82.96      82.96      82.96
 CFC-113          1995.0    25908.1    94831.8    30790.7      83.59     1294.7    23369.9    25908.1    28446.4    23713.4    51927.4    93468.5   144238.2     2149.9    26659.3    30757.7    35107.1       0.00      83.59      83.59      83.59
 CFC-113          1996.0     6872.7    89949.2    24279.2      83.69      343.5     6199.4     6872.7     7546.0    21553.2    51243.0    88589.9   134998.2     2074.2    20281.4    24250.5    28435.5       0.00      83.69      83.69      83.69
 CFC-113          1997.0     7106.1    72542.7    19766.7      83.57      355.1     6409.9     7106.1     7802.3    19566.1    37678.0    71218.1   113593.0     2027.2    15844.4    19744.2    23819.8       0.00      83.57      83.57      83.57
 CFC-113          1998.0     5283.3    59882.1    14611.7      83.32      264.0     4765.7     5283.3     5800.9    17622.7    28778.0    58594.2    97013.3     1980.6    10766.4    14595.0    18550.6       0.00      83.32      83.32      83.32
 CFC-113          1999.0     6135.4    50553.7    10255.6      82.90      306.6     5534.3     6135.4     6736.5    15736.2    22999.9    49309.1    83890.6     1945.3     6469.9    10241.3    14111.3       0.00      82.90      82.90      82.90
 CFC-113          2000.0     6642.7    46433.6    11545.7      82.34      332.0     5991.9     6642.7     7293.5    13898.7    22316.0    45242.4    76076.7     1939.4     7770.6    11530.8    15395.3       0.00      82.34      82.34      82.34
 CFC-113          2001.0     4306.0    41530.6     5970.8      81.83      215.2     3884.1     4306.0     4727.8    12109.1    20693.3    40417.6    67538.5     1902.7     2257.4     5960.1     9735.5       0.00      81.83      81.83      81.83
 CFC-113          2002.0     3698.3    39865.8      711.8      81.15      184.8     3336.0     3698.3     4060.7    10409.9    22066.5    38864.9    62362.0     1073.1        0.0        0.0     3622.2       0.00      81.15      81.15      81.15
 CFC-113          2003.0     3197.1    42852.3     5559.4      80.30      159.8     2883.9     3197.1     3510.3     9554.4    25780.7    42277.1    62798.4     1864.8     1918.1     5548.8     9249.9       0.04      80.28      80.28      80.40
 CFC-113          2004.0     1556.3    40490.0     1538.4      79.62       77.8     1403.8     1556.3     1708.8     8022.2    26060.5    40027.2    57242.2     1469.8        0.0     1265.6     4908.2       0.04      79.60      79.60      79.72
 CFC-113          2005.0      770.6    40507.9     7082.3      78.82       38.5      695.1      770.6      846.1     6937.2    27473.7    40301.5    54636.9     1837.4     3498.6     7069.9    10721.3       0.06      78.79      78.79      78.98
 CFC-113          2006.0       55.0    34196.2     8740.3      78.21        2.7       49.6       55.0       60.4     5793.2    23144.1    34095.5    45833.0     1830.1     5176.8     8727.2    12365.4       0.05      78.17      78.18      78.37
 CFC-113          2007.0      150.0    25511.0     1149.0      77.65        7.5      135.3      150.0      164.7     5077.3    15621.9    25496.1    35524.9     1294.0        0.0      739.3     4286.9       0.05      77.62      77.62      77.81
 CFC-113          2008.0      146.6    24512.0     7011.1      76.86        7.3      132.2      146.6      161.0     4899.8    14906.3    24512.1    34118.3     1791.8     3517.1     6999.0    10560.0       0.08      76.81      76.82      77.09
 CFC-113          2009.0      130.0    17647.5     2481.6      76.26        6.5      117.3      130.0      142.7     5207.2     7433.3    17640.5    27848.6      668.5     1258.1     2449.9     3876.1       0.08      76.22      76.22      76.49
 CFC-113          2010.0      120.0    15295.9     2124.9      75.53        6.0      108.2      120.0      131.8     4914.7     5923.5    15198.0    25168.9      540.2     1097.6     2111.3     3217.6       0.13      75.37      75.49      75.86
 CFC-113          2011.0        0.0    13291.0     1808.3      74.79        0.0        0.0        0.0        0.0     4656.5     4705.0    13104.3    22900.2      449.6      922.5     1806.8     2694.9       0.18      74.51      74.76      75.22
 CFC-113          2012.0        0.0    11482.7     1542.4      74.05        0.0        0.0        0.0        0.0     4410.4     3654.1    11211.1    20823.2      386.8      756.9     1548.8     2287.0       0.23      73.66      74.02      74.59
 CFC-113          2013.0        0.0     9940.4     1318.4      73.31        0.0        0.0        0.0        0.0     4169.5     2821.1     9594.6    18993.3      342.7      607.5     1328.7     1965.3       0.29      72.80      73.27      73.95
 CFC-113          2014.0        0.0     8621.9     1129.4      72.56        0.0        0.0        0.0        0.0     3932.2     2167.8     8215.7    17360.8      310.5      479.7     1141.8     1708.2       0.34      71.95      72.53      73.31
 CFC-113          2015.0        0.0     7492.5      969.5      71.83        0.0        0.0        0.0        0.0     3698.9     1663.8     7036.3    15904.1      285.6      375.6      981.4     1499.0       0.39      71.11      71.80      72.68
 CFC-113          2016.0        0.0     6523.0      833.9      71.09        0.0        0.0        0.0        0.0     3471.2     1275.3     6024.8    14586.5      265.0      291.9      843.7     1325.9       0.45      70.27      71.06      72.04
 CFC-113          2017.0        0.0     5689.1      718.6      70.36        0.0        0.0        0.0        0.0     3250.5      974.2     5158.2    13397.2      247.0      225.5      725.6     1181.7       0.50      69.43      70.33      71.41
 CFC-113          2018.0        0.0     4970.5      620.5      69.63        0.0        0.0        0.0        0.0     3038.4      744.9     4415.5    12303.2      230.6      173.2      623.5     1059.4       0.55      68.61      69.60      70.78
 CFC-113          2019.0        0.0     4350.0      536.7      68.90        0.0        0.0        0.0        0.0     2835.7      567.9     3781.7    11319.9      215.3      133.0      535.5      954.9       0.60      67.79      68.87      70.15
 CFC-113          2020.0        0.0     3813.3      465.1      68.18        0.0        0.0        0.0        0.0     2643.2      432.5     3238.1    10424.7      200.9      101.9      459.6      864.1       0.64      66.97      68.15      69.52
 CFC-113          2021.0        0.0     3348.1      403.8      67.47        0.0        0.0        0.0        0.0     2461.4      328.0     2774.3     9610.2      187.2       77.9      394.5      784.6       0.69      66.17      67.44      68.90
 CFC-113          2022.0        0.0     2944.4      351.1      66.76        0.0        0.0        0.0        0.0     2290.3      249.5     2376.5     8845.6      174.2       59.5      338.3      714.8       0.74      65.37      66.73      68.29
 CFC-113          2023.0        0.0     2593.3      305.8      66.06        0.0        0.0        0.0        0.0     2129.9      189.4     2035.8     8152.5      161.9       45.3      290.0      652.3       0.78      64.59      66.03      67.67
 CFC-113          2024.0        0.0     2287.5      266.8      65.36        0.0        0.0        0.0        0.0     1979.9      144.4     1744.1     7518.6      150.3       34.5      248.6      596.3       0.82      63.81      65.33      67.06
 CFC-113          2025.0        0.0     2020.7      233.1      64.67        0.0        0.0        0.0        0.0     1840.0      109.7     1493.6     6930.2      139.4       26.2      213.0      546.5       0.87      63.04      64.64      66.46
 CFC-113          2026.0        0.0     1787.6      204.0      63.99        0.0        0.0        0.0        0.0     1709.8       83.3     1279.3     6394.8      129.1       19.9      182.5      500.9       0.91      62.27      63.96      65.86
 CFC-113          2027.0        0.0     1583.6      178.8      63.31        0.0        0.0        0.0        0.0     1588.9       63.2     1095.5     5895.4      119.5       15.2      156.5      460.0       0.95      61.52      63.28      65.26
 CFC-113          2028.0        0.0     1404.8      156.9      62.64        0.0        0.0        0.0        0.0     1476.6       48.0      938.5     5438.4      110.6       11.5      134.1      422.5       0.99      60.78      62.61      64.67
 CFC-113          2029.0        0.0     1247.9      137.9      61.98        0.0        0.0        0.0        0.0     1372.6       36.5      803.8     5013.8      102.3        8.8      114.9      388.8       1.02      60.04      61.94      64.08
 CFC-113          2030.0        0.0     1109.9      121.4      61.32        0.0        0.0        0.0        0.0     1276.2       27.7      688.1     4626.5       94.5        6.6       98.5      357.9       1.06      59.31      61.28      63.50
 CFC-113          2031.0        0.0      988.5      107.0      60.67        0.0        0.0        0.0        0.0     1187.0       21.0      589.4     4270.9       87.4        5.0       84.4      329.7       1.10      58.59      60.63      62.92
 CFC-113          2032.0        0.0      881.5       94.5      60.02        0.0        0.0        0.0        0.0     1104.5       15.9      504.7     3944.5       80.7        3.8       72.3      303.8       1.13      57.88      59.99      62.34
 CFC-113          2033.0        0.0      787.0       83.5      59.39        0.0        0.0        0.0        0.0     1028.2       12.1      432.4     3643.9       74.6        2.9       61.9      280.1       1.17      57.18      59.35      61.77
 CFC-113          2034.0        0.0      703.5       73.9      58.76        0.0        0.0        0.0        0.0      957.6        9.2      370.3     3363.2       69.0        2.2       53.1      258.1       1.20      56.49      58.72      61.21
 CFC-113          2035.0        0.0      629.6       65.5      58.13        0.0        0.0        0.0        0.0      892.4        7.0      317.2     3106.3       63.7        1.7       45.4      238.1       1.23      55.80      58.09      60.65
 CFC-113          2036.0        0.0      564.2       58.1      57.51        0.0        0.0        0.0        0.0      832.0        5.3      271.7     2868.9       58.9        1.3       38.9      219.6       1.26      55.12      57.47      60.09
 CFC-113          2037.0        0.0      506.1       51.6      56.90        0.0        0.0        0.0        0.0      776.2        4.0      232.8     2649.5       54.5        1.0       33.3      202.6       1.29      54.45      56.86      59.54
 CFC-113          2038.0        0.0      454.5       45.9      56.29        0.0        0.0        0.0        0.0      724.7        3.0      199.3     2446.0       50.4        0.7       28.5      187.1       1.32      53.79      56.25      59.00
 CFC-113          2039.0        0.0      408.6       40.9      55.69        0.0        0.0        0.0        0.0      676.9        2.3      170.8     2260.8       46.6        0.6       24.5      172.8       1.35      53.14      55.65      58.46
 CFC-113          2040.0        0.0      367.8       36.4      55.10        0.0        0.0        0.0        0.0      632.8        1.7      146.3     2090.1       43.2        0.4       20.9      159.4       1.38      52.49      55.06      57.92
 CFC-113          2041.0        0.0      331.4       32.5      54.51        0.0        0.0        0.0        0.0      591.9        1.3      125.4     1931.0       40.0        0.3       17.9      147.1       1.41      51.85      54.47      57.39
 CFC-113          2042.0        0.0      298.9       29.0      53.93        0.0        0.0        0.0        0.0      554.1        1.0      107.4     1784.8       37.1        0.2       15.4      135.7       1.43      51.22      53.89      56.86
 CFC-113          2043.0        0.0      269.8       26.0      53.36        0.0        0.0        0.0        0.0      519.0        0.8       92.0     1649.2       34.4        0.2       13.2      125.3       1.46      50.60      53.31      56.34
 CFC-113          2044.0        0.0      243.9       23.2      52.79        0.0        0.0        0.0        0.0      486.5        0.6       78.8     1522.7       31.9        0.1       11.3      115.7       1.48      49.99      52.74      55.82
 CFC-113          2045.0        0.0      220.6       20.8      52.23        0.0        0.0        0.0        0.0      456.4        0.4       67.5     1407.1       29.6        0.1        9.7      106.9       1.51      49.38      52.18      55.31
 CFC-113          2046.0        0.0      199.8       18.7      51.67        0.0        0.0        0.0        0.0      428.5        0.3       57.8     1299.9       27.5        0.1        8.3       98.7       1.53      48.78      51.62      54.80
 CFC-113          2047.0        0.0      181.1       16.8      51.12        0.0        0.0        0.0        0.0      402.6        0.3       49.5     1200.4       25.5        0.1        7.1       91.1       1.55      48.19      51.07      54.29
 CFC-113          2048.0        0.0      164.3       15.1      50.57        0.0        0.0        0.0        0.0      378.5        0.2       42.4     1110.1       23.7        0.0        6.1       84.1       1.57      47.60      50.53      53.79
 CFC-113          2049.0        0.0      149.2       13.6      50.03        0.0        0.0        0.0        0.0      356.2        0.1       36.3     1026.0       22.1        0.0        5.2       77.7       1.59      47.02      49.99      53.30
 CFC-113          2050.0        0.0      135.6       12.2      49.50        0.0        0.0        0.0        0.0      335.4        0.1       31.1      948.1       20.5        0.0        4.5       71.8       1.62      46.45      49.45      52.81
 CFC-113          2051.0        0.0      123.4       11.0      48.97        0.0        0.0        0.0        0.0      316.1        0.1       26.7      875.4       19.1        0.0        3.8       66.3       1.64      45.89      48.92      52.32
 CFC-113          2052.0        0.0      112.4       10.0      48.45        0.0        0.0        0.0        0.0      298.1        0.1       22.9      809.6       17.8        0.0        3.3       61.4       1.65      45.33      48.40      51.84
 CFC-113          2053.0        0.0      102.4        9.0      47.93        0.0        0.0        0.0        0.0      281.3        0.0       19.6      748.8       16.6        0.0        2.8       56.7       1.67      44.78      47.88      51.36
 CFC-113          2054.0        0.0       93.4        8.1      47.42        0.0        0.0        0.0        0.0      265.8        0.0       16.8      691.9       15.5        0.0        2.4       52.4       1.69      44.23      47.37      50.89
 CFC-113          2055.0        0.0       85.3        7.4      46.92        0.0        0.0        0.0        0.0      251.2        0.0       14.4      639.9       14.5        0.0        2.1       48.4       1.71      43.69      46.87      50.42
 CFC-113          2056.0        0.0       77.9        6.7      46.42        0.0        0.0        0.0        0.0      237.7        0.0       12.3      591.0       13.5        0.0        1.8       44.7       1.73      43.16      46.36      49.95
 CFC-113          2057.0        0.0       71.3        6.0      45.92        0.0        0.0        0.0        0.0      225.0        0.0       10.5      545.8       12.6        0.0        1.5       41.3       1.74      42.64      45.87      49.49
 CFC-113          2058.0        0.0       65.2        5.5      45.43        0.0        0.0        0.0        0.0      213.2        0.0        9.0      505.0       11.8        0.0        1.3       38.2       1.76      42.12      45.38      49.03
 CFC-113          2059.0        0.0       59.8        5.0      44.95        0.0        0.0        0.0        0.0      202.1        0.0        7.7      466.9       11.1        0.0        1.1       35.3       1.77      41.61      44.89      48.58
 CFC-113          2060.0        0.0       54.8        4.5      44.47        0.0        0.0        0.0        0.0      191.8        0.0        6.6      431.3       10.4        0.0        0.9       32.6       1.79      41.10      44.41      48.13
 CFC-113          2061.0        0.0       50.3        4.1      43.99        0.0        0.0        0.0        0.0      182.1        0.0        5.7      398.7        9.7        0.0        0.8       30.1       1.80      40.60      43.94      47.69
 CFC-113          2062.0        0.0       46.1        3.7      43.53        0.0        0.0        0.0        0.0      173.1        0.0        4.9      369.3        9.1        0.0        0.7       27.9       1.82      40.11      43.47      47.25
 CFC-113          2063.0        0.0       42.4        3.4      43.06        0.0        0.0        0.0        0.0      164.6        0.0        4.2      341.4        8.6        0.0        0.6       25.7       1.83      39.62      43.00      46.81
 CFC-113          2064.0        0.0       39.0        3.1      42.60        0.0        0.0        0.0        0.0      156.7        0.0        3.6      315.4        8.0        0.0        0.5       23.8       1.84      39.14      42.54      46.38
 CFC-113          2065.0        0.0       35.9        2.8      42.15        0.0        0.0        0.0        0.0      149.2        0.0        3.1      291.5        7.6        0.0        0.4       22.0       1.85      38.66      42.09      45.95
 CFC-113          2066.0        0.0       33.0        2.6      41.70        0.0        0.0        0.0        0.0      142.3        0.0        2.6      269.4        7.1        0.0        0.4       20.3       1.87      38.19      41.64      45.53
 CFC-113          2067.0        0.0       30.4        2.4      41.25        0.0        0.0        0.0        0.0      135.7        0.0        2.2      248.8        6.7        0.0        0.3       18.8       1.88      37.73      41.19      45.11
 CFC-113          2068.0        0.0       28.1        2.2      40.81        0.0        0.0        0.0        0.0      129.5        0.0        1.9      230.1        6.3        0.0        0.3       17.4       1.89      37.27      40.75      44.69
 CFC-113          2069.0        0.0       25.9        2.0      40.38        0.0        0.0        0.0        0.0      123.7        0.0        1.6      212.8        5.9        0.0        0.2       16.1       1.90      36.82      40.32      44.28
 CFC-113          2070.0        0.0       23.9        1.8      39.95        0.0        0.0        0.0        0.0      118.3        0.0        1.4      196.5        5.6        0.0        0.2       14.8       1.91      36.37      39.89      43.87
 CFC-113          2071.0        0.0       22.1        1.7      39.52        0.0        0.0        0.0        0.0      113.1        0.0        1.2      181.7        5.3        0.0        0.2       13.7       1.92      35.93      39.46      43.46
 CFC-113          2072.0        0.0       20.5        1.5      39.10        0.0        0.0        0.0        0.0      108.3        0.0        1.0      168.0        5.0        0.0        0.1       12.7       1.93      35.49      39.04      43.06
 CFC-113          2073.0        0.0       18.9        1.4      38.69        0.0        0.0        0.0        0.0      103.7        0.0        0.9      155.3        4.7        0.0        0.1       11.7       1.94      35.06      38.62      42.66
 CFC-113          2074.0        0.0       17.5        1.3      38.27        0.0        0.0        0.0        0.0       99.4        0.0        0.8      143.5        4.4        0.0        0.1       10.8       1.94      34.63      38.21      42.27
 CFC-113          2075.0        0.0       16.2        1.2      37.87        0.0        0.0        0.0        0.0       95.4        0.0        0.7      132.6        4.2        0.0        0.1       10.0       1.95      34.21      37.80      41.88
 CFC-113          2076.0        0.0       15.1        1.1      37.46        0.0        0.0        0.0        0.0       91.6        0.0        0.6      122.6        4.0        0.0        0.1        9.3       1.96      33.80      37.40      41.49
 CFC-113          2077.0        0.0       14.0        1.0      37.06        0.0        0.0        0.0        0.0       87.9        0.0        0.5      113.2        3.8        0.0        0.1        8.6       1.97      33.39      37.00      41.11
 CFC-113          2078.0        0.0       13.0        0.9      36.67        0.0        0.0        0.0        0.0       84.5        0.0        0.4      104.7        3.6        0.0        0.1        7.9       1.97      32.98      36.60      40.73
 CFC-113          2079.0        0.0       12.1        0.8      36.28        0.0        0.0        0.0        0.0       81.3        0.0        0.4       96.8        3.4        0.0        0.1        7.3       1.98      32.58      36.21      40.35
 CFC-113          2080.0        0.0       11.2        0.8      35.89        0.0        0.0        0.0        0.0       78.2        0.0        0.3       89.5        3.2        0.0        0.0        6.8       1.99      32.18      35.82      39.98
 CFC-113          2081.0        0.0       10.4        0.7      35.51        0.0        0.0        0.0        0.0       75.3        0.0        0.3       82.7        3.0        0.0        0.0        6.3       1.99      31.79      35.44      39.61
 CFC-113          2082.0        0.0        9.7        0.7      35.13        0.0        0.0        0.0        0.0       72.5        0.0        0.2       76.4        2.9        0.0        0.0        5.8       2.00      31.41      35.06      39.24
 CFC-113          2083.0        0.0        9.0        0.6      34.76        0.0        0.0        0.0        0.0       69.9        0.0        0.2       70.6        2.7        0.0        0.0        5.3       2.00      31.02      34.68      38.88
 CFC-113          2084.0        0.0        8.4        0.6      34.39        0.0        0.0        0.0        0.0       67.5        0.0        0.2       65.3        2.6        0.0        0.0        4.9       2.01      30.65      34.31      38.52
 CFC-113          2085.0        0.0        7.9        0.5      34.02        0.0        0.0        0.0        0.0       65.1        0.0        0.1       60.3        2.5        0.0        0.0        4.6       2.01      30.28      33.95      38.17
 CFC-113          2086.0        0.0        7.3        0.5      33.66        0.0        0.0        0.0        0.0       62.9        0.0        0.1       55.7        2.4        0.0        0.0        4.2       2.02      29.91      33.58      37.81
 CFC-113          2087.0        0.0        6.8        0.5      33.30        0.0        0.0        0.0        0.0       60.7        0.0        0.1       51.5        2.2        0.0        0.0        3.9       2.02      29.54      33.22      37.46
 CFC-113          2088.0        0.0        6.4        0.4      32.94        0.0        0.0        0.0        0.0       58.7        0.0        0.1       47.6        2.1        0.0        0.0        3.6       2.02      29.18      32.87      37.12
 CFC-113          2089.0        0.0        6.0        0.4      32.59        0.0        0.0        0.0        0.0       56.8        0.0        0.1       44.0        2.0        0.0        0.0        3.3       2.03      28.83      32.52      36.78
 CFC-113          2090.0        0.0        5.6        0.4      32.25        0.0        0.0        0.0        0.0       55.0        0.0        0.1       40.7        1.9        0.0        0.0        3.1       2.03      28.48      32.17      36.44
 CFC-113          2091.0        0.0        5.2        0.3      31.90        0.0        0.0        0.0        0.0       53.2        0.0        0.1       37.6        1.9        0.0        0.0        2.8       2.03      28.13      31.83      36.10
 CFC-113          2092.0        0.0        4.9        0.3      31.56        0.0        0.0        0.0        0.0       51.6        0.0        0.0       34.8        1.8        0.0        0.0        2.6       2.03      27.79      31.49      35.77
 CFC-113          2093.0        0.0        4.6        0.3      31.23        0.0        0.0        0.0        0.0       50.0        0.0        0.0       32.2        1.7        0.0        0.0        2.4       2.03      27.45      31.15      35.43
 CFC-113          2094.0        0.0        4.3        0.3      30.90        0.0        0.0        0.0        0.0       48.4        0.0        0.0       29.8        1.6        0.0        0.0        2.2       2.04      27.12      30.82      35.11
 CFC-113          2095.0        0.0        4.0        0.2      30.57        0.0        0.0        0.0        0.0       47.0        0.0        0.0       27.5        1.6        0.0        0.0        2.1       2.04      26.79      30.49      34.78
 CFC-113          2096.0        0.0        3.8        0.2      30.24        0.0        0.0        0.0        0.0       45.6        0.0        0.0       25.4        1.5        0.0        0.0        1.9       2.04      26.46      30.16      34.46
 CFC-113          2097.0        0.0        3.5        0.2      29.92        0.0        0.0        0.0        0.0       44.3        0.0        0.0       23.5        1.4        0.0        0.0        1.8       2.04      26.14      29.84      34.14
 CFC-113          2098.0        0.0        3.3        0.2      29.60        0.0        0.0        0.0        0.0       43.0        0.0        0.0       21.7        1.4        0.0        0.0        1.6       2.04      25.82      29.52      33.83
 CFC-113          2099.0        0.0        3.1        0.2      29.29        0.0        0.0        0.0        0.0       41.8        0.0        0.0       20.1        1.3        0.0        0.0        1.5       2.04      25.51      29.20      33.52
 CFC-113          2100.0        0.0        2.9        0.2      28.97        0.0        0.0        0.0        0.0       40.6        0.0        0.0       18.6        1.3        0.0        0.0        1.4       2.04      25.20      28.89      33.21
 CFC-113          2101.0        0.0        2.8        0.2      28.67        0.0        0.0        0.0        0.0       39.5        0.0        0.0       17.2        1.2        0.0        0.0        1.3       2.04      24.89      28.58      32.90
 CFC-113          2102.0        0.0        2.6        0.2      28.36        0.0        0.0        0.0        0.0       38.5        0.0        0.0       15.9        1.2        0.0        0.0        1.2       2.04      24.59      28.28      32.59
 CFC-113          2103.0        0.0        2.5        0.1      28.06        0.0        0.0        0.0        0.0       37.4        0.0        0.0       14.7        1.1        0.0        0.0        1.1       2.04      24.29      27.97      32.29
 CFC-113          2104.0        0.0        2.3        0.1      27.76        0.0        0.0        0.0        0.0       36.5        0.0        0.0       13.6        1.1        0.0        0.0        1.0       2.04      24.00      27.68      32.00
 CFC-113          2105.0        0.0        2.2        0.1      27.46        0.0        0.0        0.0        0.0       35.5        0.0        0.0       12.6        1.0        0.0        0.0        0.9       2.04      23.70      27.38      31.70
 CFC-113          2106.0        0.0        2.1        0.1      27.17        0.0        0.0        0.0        0.0       34.6        0.0        0.0       11.6        1.0        0.0        0.0        0.9       2.04      23.42      27.09      31.41
 CFC-113          2107.0        0.0        1.9        0.1      26.88        0.0        0.0        0.0        0.0       33.7        0.0        0.0       10.8        0.9        0.0        0.0        0.8       2.04      23.13      26.80      31.12
 CFC-113          2108.0        0.0        1.8        0.1      26.60        0.0        0.0        0.0        0.0       32.9        0.0        0.0       10.0        0.9        0.0        0.0        0.7       2.04      22.85      26.51      30.83
 CFC-113          2109.0        0.0        1.7        0.1      26.31        0.0        0.0        0.0        0.0       32.1        0.0        0.0        9.2        0.9        0.0        0.0        0.7       2.03      22.57      26.23      30.54
 CFC-113          2110.0        0.0        1.6        0.1      26.03        0.0        0.0        0.0        0.0       31.3        0.0        0.0        8.5        0.8        0.0        0.0        0.6       2.03      22.30      25.95      30.26
 CFC-113          2111.0        0.0        1.5        0.1      25.76        0.0        0.0        0.0        0.0       30.5        0.0        0.0        7.9        0.8        0.0        0.0        0.6       2.03      22.03      25.67      29.98
 CFC-113          2112.0        0.0        1.5        0.1      25.48        0.0        0.0        0.0        0.0       29.8        0.0        0.0        7.3        0.8        0.0        0.0        0.5       2.03      21.76      25.40      29.70
 CFC-113          2113.0        0.0        1.4        0.1      25.21        0.0        0.0        0.0        0.0       29.1        0.0        0.0        6.7        0.8        0.0        0.0        0.5       2.02      21.49      25.12      29.43
 CFC-113          2114.0        0.0        1.3        0.1      24.94        0.0        0.0        0.0        0.0       28.5        0.0        0.0        6.2        0.7        0.0        0.0        0.5       2.02      21.23      24.85      29.16
 CFC-113          2115.0        0.0        1.2        0.1      24.68        0.0        0.0        0.0        0.0       27.8        0.0        0.0        5.7        0.7        0.0        0.0        0.4       2.02      20.97      24.59      28.89
 CFC-113          2116.0        0.0        1.2        0.1      24.42        0.0        0.0        0.0        0.0       27.2        0.0        0.0        5.3        0.7        0.0        0.0        0.4       2.02      20.72      24.33      28.62
 CFC-113          2117.0        0.0        1.1        0.1      24.16        0.0        0.0        0.0        0.0       26.6        0.0        0.0        4.9        0.7        0.0        0.0        0.4       2.01      20.47      24.07      28.36
 CFC-113          2118.0        0.0        1.0        0.1      23.90        0.0        0.0        0.0        0.0       26.0        0.0        0.0        4.5        0.6        0.0        0.0        0.3       2.01      20.22      23.81      28.10
 CFC-113          2119.0        0.0        1.0        0.1      23.65        0.0        0.0        0.0        0.0       25.4        0.0        0.0        4.2        0.6        0.0        0.0        0.3       2.01      19.97      23.55      27.84
 CFC-113          2120.0        0.0        0.9        0.0      23.39        0.0        0.0        0.0        0.0       24.9        0.0        0.0        3.9        0.6        0.0        0.0        0.3       2.00      19.73      23.30      27.58
 
 Species            Year  Prod_mean  Bank_mean  Emis_mean   Mix_mean  Prod_stdv  Prod_2.5p   Prod_50p Prod_97.5p  Bank_stdv  Bank_2.5p   Bank_50p Bank_97.5p  Emis_stdv  Emis_2.5p   Emis_50p Emis_97.5p   Mix_stdv   Mix_2.5p    Mix_50p  Mix_97.5p
 CFC-114          1950.0        0.0    78466.6    13808.3       1.13        0.0        0.0        0.0        0.0    29623.3    20826.6    78327.4   137043.9      415.7    13027.6    13795.8    14658.4       0.00       1.13       1.13       1.13
 CFC-114          1951.0     5000.0    64658.3     7204.1       1.61      249.9     4510.1     5000.0     5489.9    29397.8     7423.5    64524.8   122763.3      218.6     6793.1     7197.5     7651.0       0.00       1.61       1.61       1.61
 CFC-114          1952.0     5200.0    62454.1     7404.3       1.86      259.9     4690.6     5200.0     5709.5    29081.4     5832.6    62323.3   119910.3      225.2     6981.0     7397.4     7864.7       0.00       1.86       1.86       1.86
 CFC-114          1953.0     5400.0    60249.8     7560.2       2.11      269.9     4871.0     5400.0     5929.1    28753.0     4237.5    60116.8   117064.1      230.6     7126.6     7553.2     8031.9       0.00       2.11       2.11       2.11
 CFC-114          1954.0     5600.0    58089.6     7574.7       2.37      279.9     5051.4     5600.0     6148.6    28413.2     2727.5    57954.3   114210.0      231.8     7138.6     7567.6     8048.9       0.00       2.37       2.37       2.37
 CFC-114          1955.0     5800.0    56114.9     7546.2       2.62      289.8     5231.8     5800.0     6368.2    28064.2     1421.4    55985.3   111523.8      231.9     7110.1     7539.0     8021.0       0.00       2.62       2.62       2.62
 CFC-114          1956.0     6000.0    54368.7     7473.6       2.88      299.8     5412.2     6000.0     6587.8    27706.6      378.0    54232.7   109067.9      230.7     7039.9     7466.5     7945.7       0.00       2.88       2.88       2.88
 CFC-114          1957.0     6300.0    52895.1     7435.1       3.13      314.8     5682.8     6300.0     6917.2    27341.1     -370.2    52764.0   106869.5      230.6     7001.5     7428.0     7906.5       0.00       3.13       3.13       3.13
 CFC-114          1958.0     6500.0    51760.0     7420.3       3.37      324.8     5863.2     6500.0     7136.8    26963.4     -774.2    51632.9   105023.0      231.3     6985.0     7413.1     7892.8       0.00       3.37       3.37       3.37
 CFC-114          1959.0     6700.0    50839.7     6544.2       3.62      334.8     6043.6     6700.0     7356.4    26577.0     -911.1    50708.9   103336.1      207.4     6153.6     6538.0     6967.9       0.00       3.62       3.62       3.62
 CFC-114          1960.0     7000.0    50995.5     6822.9       3.83      349.8     6314.2     7000.0     7685.8    26195.0      -25.8    50864.9   102767.4      216.5     6415.0     6816.4     7265.2       0.00       3.83       3.83       3.83
 CFC-114          1961.0     7300.0    51172.7     7115.8       4.05      364.8     6584.8     7300.0     8015.2    25796.1      930.8    51050.6   102182.9      226.1     6689.8     7109.2     7577.9       0.00       4.05       4.05       4.05
 CFC-114          1962.0     7600.0    51356.9     7417.2       4.28      379.8     6855.4     7600.0     8344.6    25380.3     1947.4    51236.8   101538.6      236.1     6972.6     7410.3     7899.5       0.00       4.28       4.28       4.28
 CFC-114          1963.0     7800.0    51539.7     7683.6       4.52      389.8     7035.8     7800.0     8564.2    24947.2     2940.1    51422.4   100888.6      245.1     7221.9     7676.6     8184.1       0.00       4.52       4.52       4.52
 CFC-114          1964.0     8100.0    51656.1     7969.6       4.77      404.8     7306.4     8100.0     8893.6    24501.4     3914.9    51553.8   100135.8      254.7     7489.6     7962.2     8489.9       0.00       4.77       4.77       4.77
 CFC-114          1965.0     8400.0    51786.5     8267.2       5.03      419.8     7577.0     8400.0     9223.0    24038.6     4944.6    51691.0    99358.0      264.6     7768.6     8259.5     8808.1       0.00       5.03       5.03       5.03
 CFC-114          1966.0     8800.0    51919.3     8612.3       5.30      439.8     7937.9     8800.0     9662.2    23558.8     5998.3    51830.5    98547.5      276.0     8092.1     8604.3     9176.7       0.00       5.30       5.30       5.30
 CFC-114          1967.0     9100.0    52106.9     8946.1       5.57      454.8     8208.5     9100.0     9991.6    23057.5     7162.2    52016.6    97744.7      287.2     8404.8     8937.7     9533.0       0.00       5.57       5.57       5.57
 CFC-114          1968.0     9500.0    52260.9     9313.2       5.86      474.7     8569.3     9500.0    10430.7    22538.6     8317.0    52171.5    96866.1      299.3     8749.1     9304.4     9925.0       0.00       5.86       5.86       5.86
 CFC-114          1969.0     9900.0    52447.7     9700.7       6.16      494.7     8930.1     9900.0    10869.9    21998.1     9552.3    52360.3    95972.8      312.1     9112.2     9691.6    10338.7       0.00       6.16       6.16       6.16
 CFC-114          1970.0    10200.0    52647.0    10060.9       6.47      509.7     9200.7    10200.0    11199.3    21435.6    10845.2    52562.2    95070.4      324.3     9449.5    10051.5    10723.7       0.00       6.47       6.47       6.47
 CFC-114          1971.0    10600.0    52786.0    10444.5       6.79      529.7     9561.5    10600.0    11638.5    20855.6    12105.0    52697.6    94075.5      337.1     9808.8    10434.7    11133.7       0.00       6.79       6.79       6.79
 CFC-114          1972.0    11100.0    52941.5    10883.0       7.13      554.7    10012.5    11100.0    12187.5    20254.0    13444.4    52859.7    93052.7      351.6    10219.9    10872.7    11601.9       0.00       7.13       7.13       7.13
 CFC-114          1973.0    11500.0    53158.5    11314.5       7.47      574.7    10373.3    11500.0    12626.7    19626.5    14910.4    53073.9    92027.2      366.0    10624.2    11303.7    12062.6       0.00       7.47       7.47       7.47
 CFC-114          1974.0    11900.0    53344.0    14564.7       7.84      594.7    10734.1    11900.0    13065.9    18977.3    16363.5    53254.7    90942.2      460.3    13697.8    14550.9    15505.3       0.00       7.84       7.84       7.84
 CFC-114          1975.0    12400.0    50679.3    15045.3       8.31      619.7    11185.2    12400.0    13614.9    18264.3    15111.4    50605.6    86870.8      476.7    14147.5    15031.1    16019.2       0.00       8.31       8.31       8.31
 CFC-114          1976.0    12900.0    48034.0    15548.9       8.80      644.7    11636.2    12900.0    14163.8    17525.8    13900.6    47967.8    82743.3      493.8    14618.6    15534.4    16557.7       0.00       8.80       8.80       8.80
 CFC-114          1977.0    13400.0    45385.1    16066.9       9.30      669.6    12087.2    13400.0    14712.8    16761.9    12762.4    45320.1    78570.4      511.5    15103.3    16052.0    17111.9       0.00       9.30       9.30       9.30
 CFC-114          1978.0    13900.0    42718.3    13981.0       9.82      694.6    12538.2    13900.0    15261.8    15973.4    11615.7    42661.2    74322.4      456.2    13120.4    13967.8    14913.5       0.00       9.82       9.82       9.82
 CFC-114          1979.0    14400.0    42637.2    13770.5      10.27      719.6    12989.2    14400.0    15810.8    15198.7    13037.2    42569.0    72708.2      453.5    12914.6    13757.7    14697.5       0.00      10.27      10.27      10.27
 CFC-114          1980.0    14994.0    43266.7    14110.8      10.70      749.3    13525.0    14994.0    16463.0    14412.2    15179.9    43196.3    71769.1      466.0    13231.5    14097.8    15063.8       0.00      10.70      10.70      10.70
 CFC-114          1981.0    14011.0    44149.9    13939.5      11.14      700.2    12638.3    14011.0    15383.7    13604.8    17647.1    44087.9    71066.8      464.7    13063.1    13926.7    14889.3       0.00      11.14      11.14      11.14
 CFC-114          1982.0    13580.0    44221.4    13561.4      11.58      678.6    12249.6    13580.0    14910.5    12837.5    19244.8    44157.1    69641.9      458.0    12697.4    13549.1    14496.5       0.00      11.58      11.58      11.58
 CFC-114          1983.0    14774.0    44239.9    14051.0      12.00      738.3    13326.6    14774.0    16221.4    12094.6    20695.5    44167.8    68199.4      474.5    13155.7    14038.2    15019.8       0.00      12.00      12.00      12.00
 CFC-114          1984.0    15573.0    44963.0    15074.0      12.43      778.2    14047.3    15573.0    17098.7    11314.5    22944.9    44890.7    67379.4      505.5    14120.2    15060.2    16106.7       0.00      12.43      12.43      12.43
 CFC-114          1985.0    17091.0    45462.0    16298.8      12.90      854.1    15416.6    17091.0    18765.5    10507.9    25009.2    45390.7    66278.7      542.4    15275.6    16283.7    17407.4       0.00      12.90      12.90      12.90
 CFC-114          1986.0    17391.0    46254.2    17818.7      13.41      869.1    15687.2    17391.0    19094.8     9659.9    27474.2    46184.6    65402.7      587.8    16709.7    17802.3    19020.2       0.00      13.41      13.41      13.41
 CFC-114          1987.0    16401.7    45826.5    17753.2      13.97      819.6    14794.8    16401.7    18008.6     8814.1    28697.3    45745.5    63316.2      590.2    16639.9    17736.8    18959.8       0.00      13.97      13.97      13.97
 CFC-114          1988.0    15412.3    44475.0    15862.8      14.53      770.2    13902.4    15412.3    16922.3     8032.7    28871.4    44405.6    60411.9      543.9    14835.9    15848.6    16972.1       0.00      14.53      14.53      14.53
 CFC-114          1989.0    14423.0    44024.5    13801.5      15.01      720.8    13010.0    14423.0    15836.1     7339.8    29768.0    43962.9    58575.8      495.0    12865.1    13789.3    14809.5       0.00      15.01      15.01      15.01
 CFC-114          1990.0    11467.0    44646.0     9861.9      15.42      573.0    10343.6    11467.0    12590.5     6737.4    31547.2    44596.2    58023.9      405.5     9091.6     9852.7    10686.4       0.00      15.42      15.42      15.42
 CFC-114          1991.0    12074.0    46251.1     6437.0      15.69      603.4    10891.1    12074.0    13256.9     6264.9    34062.5    46196.9    58683.5      341.2     5784.3     6430.4     7125.4       0.00      15.69      15.69      15.69
 CFC-114          1992.0     5947.0    51888.1     5513.9      15.84      297.2     5364.4     5947.0     6529.6     5859.2    40494.9    51838.8    63525.5      328.4     4884.1     5508.3     6175.4       0.00      15.84      15.84      15.84
 CFC-114          1993.0     5318.0    52321.2     5205.1      15.95      265.8     4797.0     5318.0     5839.0     5544.8    41532.3    52271.6    63315.2      325.5     4579.9     5199.8     5860.7       0.00      15.95      15.95      15.95
 CFC-114          1994.0     2780.0    52434.1     4876.5      16.05      138.9     2507.6     2780.0     3052.4     5252.0    42218.4    52392.0    62831.0      322.4     4257.2     4871.5     5525.4       0.00      16.05      16.05      16.05
 CFC-114          1995.0     2703.0    50337.6     4641.0      16.14      135.1     2438.2     2703.0     2967.8     4983.4    40621.2    50302.2    60197.4      320.7     4024.9     4636.3     5285.8       0.00      16.14      16.14      16.14
 CFC-114          1996.0      182.0    48399.7     4300.2      16.21        9.1      164.2      182.0      199.8     4726.1    39179.2    48368.8    57741.2      317.6     3689.6     4295.7     4936.8       0.00      16.21      16.21      16.21
 CFC-114          1997.0      302.0    44281.5     4574.6      16.28       15.1      272.4      302.0      331.6     4483.6    35527.3    44255.0    53125.2      322.2     3955.4     4570.0     5222.1       0.00      16.28      16.28      16.28
 CFC-114          1998.0      159.0    40008.9     4791.8      16.36        7.9      143.4      159.0      174.6     4248.4    31713.3    39986.6    48378.0      326.2     4165.2     4787.0     5448.0       0.00      16.36      16.36      16.36
 CFC-114          1999.0      150.0    35376.1     3929.1      16.44        7.5      135.3      150.0      164.7     4023.4    27520.9    35356.2    43284.1      316.9     3319.1     3925.3     4563.3       0.00      16.44      16.44      16.44
 CFC-114          2000.0      243.0    31597.0     3218.6      16.49       12.1      219.2      243.0      266.8     3816.0    24140.4    31586.7    39098.8      310.4     2619.1     3215.7     3838.5       0.00      16.49      16.49      16.49
 CFC-114          2001.0      275.0    28621.4     1511.5      16.52       13.7      248.1      275.0      301.9     3626.4    21536.1    28616.0    35743.2      298.7      929.7     1510.3     2104.0       0.00      16.52      16.52      16.52
 CFC-114          2002.0      385.5    27384.9     1798.1      16.49       19.3      347.7      385.5      423.3     3459.9    20626.0    27381.7    34179.9      299.5     1215.8     1796.6     2392.7       0.00      16.49      16.49      16.49
 CFC-114          2003.0      291.0    25972.4     4550.1      16.46       14.5      262.5      291.0      319.5     3311.2    19490.3    25966.9    32484.1      324.8     3925.8     4545.4     5202.3       0.00      16.46      16.46      16.46
 CFC-114          2004.0      143.7    21713.3     2799.2      16.54        7.2      129.6      143.7      157.8     3177.5    15487.2    21706.0    27968.9      307.4     2204.2     2796.8     3412.3       0.00      16.54      16.54      16.54
 CFC-114          2005.0      261.0    19057.7     1609.0      16.55       13.0      235.4      261.0      286.6     3073.9    13026.9    19055.7    25099.6      299.7     1025.6     1607.9     2203.3       0.00      16.55      16.55      16.55
 CFC-114          2006.0       98.2    17709.7     1733.7      16.52        4.9       88.6       98.2      107.8     2999.1    11829.4    17706.7    23600.5      299.8     1150.7     1732.4     2328.7       0.00      16.52      16.52      16.52
 CFC-114          2007.0      221.8    16074.1     1602.9      16.49       11.1      200.1      221.8      243.5     2953.1    10289.3    16071.9    21868.1      298.6     1021.5     1601.8     2195.2       0.00      16.49      16.49      16.49
 CFC-114          2008.0      104.8    14693.0     1558.3      16.46        5.2       94.5      104.8      115.1     2937.0     8935.1    14693.0    20451.1      297.9      978.1     1557.1     2149.1       0.00      16.46      16.46      16.46
 CFC-114          2009.0        0.0    13239.5     1322.1      16.43        0.0        0.0        0.0        0.0     2951.2     7448.2    13240.3    19025.9      308.2      751.7     1310.3     1959.4       0.00      16.43      16.43      16.43
 CFC-114          2010.0        0.0    11917.4     1181.4      16.39        0.0        0.0        0.0        0.0     2847.2     6389.4    11895.6    17559.3      259.6      693.4     1174.2     1710.3       0.01      16.37      16.39      16.42
 CFC-114          2011.0        0.0    10736.0     1056.6      16.35        0.0        0.0        0.0        0.0     2755.9     5453.9    10689.8    16263.7      221.4      634.3     1052.4     1501.8       0.02      16.30      16.35      16.39
 CFC-114          2012.0        0.0     9679.5      945.8      16.30        0.0        0.0        0.0        0.0     2670.2     4646.7     9613.8    15099.6      191.8      575.6      943.6     1327.6       0.04      16.23      16.30      16.37
 CFC-114          2013.0        0.0     8733.7      847.3      16.25        0.0        0.0        0.0        0.0     2586.2     3941.3     8643.3    14058.2      169.2      517.0      846.5     1181.1       0.05      16.15      16.25      16.33
 CFC-114          2014.0        0.0     7886.4      759.7      16.19        0.0        0.0        0.0        0.0     2501.8     3337.1     7773.7    13114.4      151.9      458.9      760.3     1056.0       0.06      16.07      16.19      16.30
 CFC-114          2015.0        0.0     7126.7      681.7      16.13        0.0        0.0        0.0        0.0     2416.2     2817.7     6988.3    12252.2      138.9      403.2      683.2      949.2       0.07      15.99      16.13      16.26
 CFC-114          2016.0        0.0     6445.0      612.2      16.07        0.0        0.0        0.0        0.0     2329.2     2375.6     6284.0    11462.8      128.9      349.9      614.7      857.7       0.08      15.91      16.07      16.22
 CFC-114          2017.0        0.0     5832.8      550.3      16.01        0.0        0.0        0.0        0.0     2241.3     2000.9     5649.1    10731.8      121.0      301.8      553.5      778.6       0.09      15.83      16.01      16.18
 CFC-114          2018.0        0.0     5282.5      494.9      15.94        0.0        0.0        0.0        0.0     2152.8     1686.2     5079.4    10057.9      114.6      258.4      498.8      709.7       0.10      15.74      15.95      16.13
 CFC-114          2019.0        0.0     4787.6      445.5      15.88        0.0        0.0        0.0        0.0     2064.3     1418.8     4566.7     9441.2      109.1      219.6      449.5      649.6       0.11      15.66      15.88      16.08
 CFC-114          2020.0        0.0     4342.1      401.3      15.81        0.0        0.0        0.0        0.0     1976.3     1192.7     4106.4     8861.3      104.3      186.4      405.1      595.8       0.12      15.57      15.81      16.04
 CFC-114          2021.0        0.0     3940.7      361.8      15.74        0.0        0.0        0.0        0.0     1889.3     1003.1     3693.3     8324.0       99.9      157.4      365.3      548.5       0.13      15.48      15.74      15.99
 CFC-114          2022.0        0.0     3578.9      326.4      15.67        0.0        0.0        0.0        0.0     1803.9      841.2     3320.7     7817.5       95.8      132.9      329.3      506.4       0.14      15.39      15.67      15.93
 CFC-114          2023.0        0.0     3252.5      294.7      15.60        0.0        0.0        0.0        0.0     1720.4      705.8     2985.4     7345.9       91.8      112.0      296.8      468.4       0.15      15.30      15.60      15.88
 CFC-114          2024.0        0.0     2957.8      266.2      15.53        0.0        0.0        0.0        0.0     1639.0      592.6     2684.4     6905.3       87.9       94.3      267.4      434.5       0.16      15.21      15.53      15.83
 CFC-114          2025.0        0.0     2691.6      240.7      15.45        0.0        0.0        0.0        0.0     1560.1      498.0     2413.7     6490.8       84.1       79.4      240.8      403.8       0.17      15.12      15.46      15.78
 CFC-114          2026.0        0.0     2450.9      217.7      15.38        0.0        0.0        0.0        0.0     1483.7      417.6     2170.0     6102.5       80.4       66.9      216.8      375.7       0.18      15.03      15.38      15.72
 CFC-114          2027.0        0.0     2233.2      197.1      15.31        0.0        0.0        0.0        0.0     1410.2      350.3     1951.1     5742.7       76.8       56.2      195.2      350.2       0.19      14.94      15.31      15.67
 CFC-114          2028.0        0.0     2036.0      178.6      15.23        0.0        0.0        0.0        0.0     1339.5      293.8     1754.4     5402.1       73.2       47.1      175.7      326.9       0.19      14.85      15.24      15.61
 CFC-114          2029.0        0.0     1857.5      161.9      15.16        0.0        0.0        0.0        0.0     1271.6      246.4     1577.4     5085.3       69.8       39.6      158.1      305.6       0.20      14.76      15.16      15.56
 CFC-114          2030.0        0.0     1695.6      146.8      15.09        0.0        0.0        0.0        0.0     1206.7      206.6     1418.6     4783.7       66.4       33.2      142.3      285.9       0.21      14.67      15.09      15.50
 CFC-114          2031.0        0.0     1548.8      133.3      15.01        0.0        0.0        0.0        0.0     1144.7      173.0     1276.0     4504.7       63.1       27.9      128.0      267.7       0.22      14.57      15.01      15.44
 CFC-114          2032.0        0.0     1415.6      121.0      14.94        0.0        0.0        0.0        0.0     1085.5      144.8     1147.4     4242.8       60.0       23.4      115.1      250.9       0.23      14.48      14.94      15.39
 CFC-114          2033.0        0.0     1294.5      110.0      14.86        0.0        0.0        0.0        0.0     1029.2      121.4     1031.3     3995.0       56.9       19.6      103.6      235.4       0.24      14.39      14.86      15.33
 CFC-114          2034.0        0.0     1184.6      100.0      14.79        0.0        0.0        0.0        0.0      975.5      101.6      927.5     3759.1       54.0       16.5       93.2      221.0       0.25      14.30      14.79      15.27
 CFC-114          2035.0        0.0     1084.5       91.0      14.71        0.0        0.0        0.0        0.0      924.6       85.1      834.1     3538.4       51.2       13.8       83.8      207.6       0.26      14.21      14.71      15.22
 CFC-114          2036.0        0.0      993.6       82.8      14.64        0.0        0.0        0.0        0.0      876.2       71.2      749.8     3332.1       48.5       11.6       75.4      195.1       0.26      14.12      14.64      15.16
 CFC-114          2037.0        0.0      910.7       75.5      14.57        0.0        0.0        0.0        0.0      830.3       59.7      674.1     3136.8       45.9        9.7       67.8      183.4       0.27      14.03      14.57      15.10
 CFC-114          2038.0        0.0      835.2       68.8      14.49        0.0        0.0        0.0        0.0      786.8       50.0      606.3     2954.5       43.4        8.1       60.9      172.6       0.28      13.94      14.49      15.05
 CFC-114          2039.0        0.0      766.5       62.7      14.42        0.0        0.0        0.0        0.0      745.5       41.9      545.2     2783.5       41.1        6.8       54.8      162.3       0.29      13.85      14.42      14.99
 CFC-114          2040.0        0.0      703.7       57.3      14.34        0.0        0.0        0.0        0.0      706.5       35.1      490.1     2621.7       38.8        5.7       49.3      152.6       0.30      13.77      14.34      14.93
 CFC-114          2041.0        0.0      646.5       52.3      14.27        0.0        0.0        0.0        0.0      669.6       29.4      440.6     2470.2       36.7        4.8       44.4      143.6       0.30      13.68      14.27      14.87
 CFC-114          2042.0        0.0      594.2       47.8      14.20        0.0        0.0        0.0        0.0      634.6       24.6      396.1     2327.9       34.7        4.0       39.9      135.1       0.31      13.59      14.20      14.81
 CFC-114          2043.0        0.0      546.4       43.7      14.12        0.0        0.0        0.0        0.0      601.6       20.7      356.1     2192.9       32.8        3.3       35.9      127.2       0.32      13.50      14.12      14.76
 CFC-114          2044.0        0.0      502.8       39.9      14.05        0.0        0.0        0.0        0.0      570.3       17.3      320.1     2065.6       31.0        2.8       32.3      119.8       0.33      13.42      14.05      14.70
 CFC-114          2045.0        0.0      462.9       36.5      13.98        0.0        0.0        0.0        0.0      540.8       14.5      287.9     1947.8       29.3        2.3       29.0      112.7       0.33      13.33      13.98      14.64
 CFC-114          2046.0        0.0      426.3       33.4      13.91        0.0        0.0        0.0        0.0      512.9       12.1      258.9     1835.5       27.6        2.0       26.1      106.0       0.34      13.25      13.90      14.58
 CFC-114          2047.0        0.0      392.9       30.6      13.84        0.0        0.0        0.0        0.0      486.5       10.2      232.8     1728.9       26.1        1.6       23.5       99.8       0.35      13.16      13.83      14.53
 CFC-114          2048.0        0.0      362.2       28.1      13.76        0.0        0.0        0.0        0.0      461.6        8.5      209.3     1629.2       24.7        1.4       21.1       94.0       0.36      13.08      13.76      14.47
 CFC-114          2049.0        0.0      334.2       25.8      13.69        0.0        0.0        0.0        0.0      438.0        7.1      188.2     1535.1       23.3        1.2       19.0       88.6       0.36      12.99      13.69      14.41
 CFC-114          2050.0        0.0      308.4       23.6      13.62        0.0        0.0        0.0        0.0      415.8        6.0      169.2     1446.8       22.0        1.0       17.0       83.5       0.37      12.91      13.62      14.36
 CFC-114          2051.0        0.0      284.8       21.7      13.55        0.0        0.0        0.0        0.0      394.8        5.0      152.2     1364.1       20.8        0.8       15.3       78.6       0.38      12.83      13.55      14.30
 CFC-114          2052.0        0.0      263.1       19.9      13.48        0.0        0.0        0.0        0.0      374.9        4.2      136.8     1286.1       19.6        0.7       13.8       74.0       0.38      12.74      13.48      14.24
 CFC-114          2053.0        0.0      243.2       18.3      13.41        0.0        0.0        0.0        0.0      356.1        3.5      123.0     1212.5       18.6        0.6       12.4       69.7       0.39      12.66      13.40      14.19
 CFC-114          2054.0        0.0      224.9       16.8      13.34        0.0        0.0        0.0        0.0      338.4        2.9      110.6     1143.2       17.5        0.5       11.1       65.6       0.40      12.58      13.33      14.13
 CFC-114          2055.0        0.0      208.1       15.5      13.27        0.0        0.0        0.0        0.0      321.7        2.5       99.4     1077.0       16.6        0.4       10.0       61.8       0.40      12.50      13.26      14.07
 CFC-114          2056.0        0.0      192.6       14.2      13.20        0.0        0.0        0.0        0.0      305.8        2.1       89.3     1015.4       15.7        0.3        9.0       58.3       0.41      12.42      13.20      14.02
 CFC-114          2057.0        0.0      178.3       13.1      13.13        0.0        0.0        0.0        0.0      290.9        1.7       80.3      957.7       14.8        0.3        8.1       54.9       0.41      12.34      13.13      13.96
 CFC-114          2058.0        0.0      165.2       12.1      13.06        0.0        0.0        0.0        0.0      276.7        1.4       72.2      902.2       14.0        0.2        7.3       51.8       0.42      12.26      13.06      13.91
 CFC-114          2059.0        0.0      153.2       11.1      13.00        0.0        0.0        0.0        0.0      263.4        1.2       64.9      850.3       13.2        0.2        6.6       48.8       0.43      12.18      12.99      13.85
 CFC-114          2060.0        0.0      142.0       10.3      12.93        0.0        0.0        0.0        0.0      250.7        1.0       58.4      801.4       12.5        0.2        5.9       45.9       0.43      12.10      12.92      13.80
 CFC-114          2061.0        0.0      131.8        9.5      12.86        0.0        0.0        0.0        0.0      238.8        0.8       52.5      755.9       11.9        0.1        5.3       43.3       0.44      12.02      12.85      13.74
 CFC-114          2062.0        0.0      122.3        8.7      12.79        0.0        0.0        0.0        0.0      227.5        0.7       47.2      713.1       11.2        0.1        4.8       40.8       0.44      11.94      12.79      13.69
 CFC-114          2063.0        0.0      113.6        8.1      12.73        0.0        0.0        0.0        0.0      216.8        0.6       42.4      672.6       10.6        0.1        4.3       38.5       0.45      11.86      12.72      13.63
 CFC-114          2064.0        0.0      105.5        7.4      12.66        0.0        0.0        0.0        0.0      206.6        0.5       38.1      634.0       10.1        0.1        3.8       36.2       0.46      11.79      12.65      13.58
 CFC-114          2065.0        0.0       98.1        6.9      12.59        0.0        0.0        0.0        0.0      197.0        0.4       34.3      597.8        9.5        0.1        3.5       34.2       0.46      11.71      12.58      13.52
 CFC-114          2066.0        0.0       91.2        6.4      12.53        0.0        0.0        0.0        0.0      188.0        0.3       30.8      563.5        9.0        0.1        3.1       32.2       0.47      11.64      12.52      13.47
 CFC-114          2067.0        0.0       84.8        5.9      12.46        0.0        0.0        0.0        0.0      179.4        0.3       27.7      531.8        8.6        0.0        2.8       30.3       0.47      11.56      12.45      13.41
 CFC-114          2068.0        0.0       78.9        5.4      12.40        0.0        0.0        0.0        0.0      171.2        0.2       24.9      501.3        8.1        0.0        2.5       28.6       0.48      11.48      12.39      13.36
 CFC-114          2069.0        0.0       73.5        5.0      12.33        0.0        0.0        0.0        0.0      163.5        0.2       22.4      473.0        7.7        0.0        2.3       27.0       0.48      11.41      12.32      13.31
 CFC-114          2070.0        0.0       68.4        4.7      12.27        0.0        0.0        0.0        0.0      156.2        0.2       20.2      445.6        7.3        0.0        2.0       25.4       0.49      11.34      12.26      13.25
 CFC-114          2071.0        0.0       63.8        4.3      12.20        0.0        0.0        0.0        0.0      149.2        0.1       18.1      420.0        6.9        0.0        1.8       24.0       0.49      11.26      12.19      13.20
 CFC-114          2072.0        0.0       59.5        4.0      12.14        0.0        0.0        0.0        0.0      142.7        0.1       16.3      395.6        6.6        0.0        1.6       22.6       0.50      11.19      12.13      13.15
 CFC-114          2073.0        0.0       55.4        3.7      12.07        0.0        0.0        0.0        0.0      136.4        0.1       14.6      373.1        6.2        0.0        1.5       21.3       0.50      11.12      12.06      13.09
 CFC-114          2074.0        0.0       51.7        3.4      12.01        0.0        0.0        0.0        0.0      130.5        0.1       13.2      351.8        5.9        0.0        1.3       20.1       0.51      11.04      12.00      13.04
 CFC-114          2075.0        0.0       48.3        3.2      11.95        0.0        0.0        0.0        0.0      124.9        0.1       11.8      331.6        5.6        0.0        1.2       18.9       0.51      10.97      11.94      12.99
 CFC-114          2076.0        0.0       45.1        3.0      11.89        0.0        0.0        0.0        0.0      119.5        0.1       10.6      313.2        5.3        0.0        1.1       17.8       0.52      10.90      11.87      12.94
 CFC-114          2077.0        0.0       42.1        2.8      11.82        0.0        0.0        0.0        0.0      114.5        0.0        9.6      295.2        5.1        0.0        1.0       16.8       0.52      10.83      11.81      12.88
 CFC-114          2078.0        0.0       39.4        2.6      11.76        0.0        0.0        0.0        0.0      109.7        0.0        8.6      278.4        4.8        0.0        0.9       15.9       0.53      10.76      11.75      12.83
 CFC-114          2079.0        0.0       36.8        2.4      11.70        0.0        0.0        0.0        0.0      105.1        0.0        7.7      262.6        4.6        0.0        0.8       15.0       0.53      10.69      11.69      12.78
 CFC-114          2080.0        0.0       34.4        2.2      11.64        0.0        0.0        0.0        0.0      100.7        0.0        7.0      247.5        4.4        0.0        0.7       14.1       0.54      10.62      11.63      12.73
 CFC-114          2081.0        0.0       32.2        2.1      11.58        0.0        0.0        0.0        0.0       96.6        0.0        6.3      233.4        4.1        0.0        0.6       13.3       0.54      10.55      11.57      12.68
 CFC-114          2082.0        0.0       30.1        1.9      11.52        0.0        0.0        0.0        0.0       92.7        0.0        5.6      220.1        3.9        0.0        0.6       12.5       0.55      10.48      11.50      12.63
 CFC-114          2083.0        0.0       28.2        1.8      11.46        0.0        0.0        0.0        0.0       88.9        0.0        5.1      207.6        3.8        0.0        0.5       11.8       0.55      10.41      11.44      12.57
 CFC-114          2084.0        0.0       26.4        1.7      11.40        0.0        0.0        0.0        0.0       85.3        0.0        4.5      195.8        3.6        0.0        0.5       11.2       0.55      10.35      11.38      12.52
 CFC-114          2085.0        0.0       24.8        1.6      11.34        0.0        0.0        0.0        0.0       81.9        0.0        4.1      184.6        3.4        0.0        0.4       10.5       0.56      10.28      11.32      12.47
 CFC-114          2086.0        0.0       23.2        1.4      11.28        0.0        0.0        0.0        0.0       78.7        0.0        3.7      174.0        3.3        0.0        0.4        9.9       0.56      10.21      11.26      12.42
 CFC-114          2087.0        0.0       21.8        1.3      11.22        0.0        0.0        0.0        0.0       75.6        0.0        3.3      164.0        3.1        0.0        0.3        9.4       0.57      10.15      11.20      12.37
 CFC-114          2088.0        0.0       20.4        1.3      11.16        0.0        0.0        0.0        0.0       72.7        0.0        3.0      154.7        3.0        0.0        0.3        8.8       0.57      10.08      11.14      12.32
 CFC-114          2089.0        0.0       19.2        1.2      11.10        0.0        0.0        0.0        0.0       69.9        0.0        2.7      145.8        2.8        0.0        0.3        8.3       0.58      10.01      11.09      12.27
 CFC-114          2090.0        0.0       18.0        1.1      11.04        0.0        0.0        0.0        0.0       67.2        0.0        2.4      137.4        2.7        0.0        0.2        7.8       0.58       9.95      11.03      12.22
 CFC-114          2091.0        0.0       16.9        1.0      10.98        0.0        0.0        0.0        0.0       64.7        0.0        2.2      129.5        2.6        0.0        0.2        7.4       0.58       9.88      10.97      12.17
 CFC-114          2092.0        0.0       15.9        1.0      10.93        0.0        0.0        0.0        0.0       62.2        0.0        1.9      122.2        2.5        0.0        0.2        7.0       0.59       9.82      10.91      12.13
 CFC-114          2093.0        0.0       14.9        0.9      10.87        0.0        0.0        0.0        0.0       59.9        0.0        1.7      115.3        2.3        0.0        0.2        6.6       0.59       9.76      10.85      12.08
 CFC-114          2094.0        0.0       14.0        0.8      10.81        0.0        0.0        0.0        0.0       57.7        0.0        1.6      108.7        2.2        0.0        0.2        6.2       0.59       9.69      10.80      12.03
 CFC-114          2095.0        0.0       13.2        0.8      10.76        0.0        0.0        0.0        0.0       55.6        0.0        1.4      102.5        2.1        0.0        0.1        5.8       0.60       9.63      10.74      11.98
 CFC-114          2096.0        0.0       12.4        0.7      10.70        0.0        0.0        0.0        0.0       53.6        0.0        1.3       96.7        2.0        0.0        0.1        5.5       0.60       9.57      10.68      11.93
 CFC-114          2097.0        0.0       11.7        0.7      10.64        0.0        0.0        0.0        0.0       51.6        0.0        1.1       91.1        2.0        0.0        0.1        5.2       0.61       9.50      10.63      11.88
 CFC-114          2098.0        0.0       11.0        0.6      10.59        0.0        0.0        0.0        0.0       49.8        0.0        1.0       86.0        1.9        0.0        0.1        4.9       0.61       9.44      10.57      11.83
 CFC-114          2099.0        0.0       10.3        0.6      10.53        0.0        0.0        0.0        0.0       48.0        0.0        0.9       81.1        1.8        0.0        0.1        4.6       0.61       9.38      10.52      11.79
 CFC-114          2100.0        0.0        9.7        0.6      10.48        0.0        0.0        0.0        0.0       46.3        0.0        0.8       76.6        1.7        0.0        0.1        4.4       0.62       9.32      10.46      11.74
 CFC-114          2101.0        0.0        9.2        0.5      10.42        0.0        0.0        0.0        0.0       44.7        0.0        0.7       72.2        1.6        0.0        0.1        4.1       0.62       9.26      10.40      11.69
 CFC-114          2102.0        0.0        8.7        0.5      10.37        0.0        0.0        0.0        0.0       43.1        0.0        0.7       68.1        1.6        0.0        0.1        3.9       0.62       9.20      10.35      11.64
 CFC-114          2103.0        0.0        8.2        0.5      10.31        0.0        0.0        0.0        0.0       41.6        0.0        0.6       64.1        1.5        0.0        0.1        3.7       0.63       9.14      10.30      11.60
 CFC-114          2104.0        0.0        7.7        0.4      10.26        0.0        0.0        0.0        0.0       40.2        0.0        0.5       60.4        1.4        0.0        0.1        3.4       0.63       9.08      10.24      11.55
 CFC-114          2105.0        0.0        7.3        0.4      10.21        0.0        0.0        0.0        0.0       38.8        0.0        0.5       57.0        1.4        0.0        0.0        3.2       0.63       9.02      10.19      11.50
 CFC-114          2106.0        0.0        6.9        0.4      10.15        0.0        0.0        0.0        0.0       37.5        0.0        0.4       53.8        1.3        0.0        0.0        3.1       0.64       8.96      10.13      11.46
 CFC-114          2107.0        0.0        6.5        0.4      10.10        0.0        0.0        0.0        0.0       36.3        0.0        0.4       50.7        1.3        0.0        0.0        2.9       0.64       8.90      10.08      11.41
 CFC-114          2108.0        0.0        6.1        0.3      10.05        0.0        0.0        0.0        0.0       35.1        0.0        0.4       47.8        1.2        0.0        0.0        2.7       0.64       8.85      10.03      11.36
 CFC-114          2109.0        0.0        5.8        0.3       9.99        0.0        0.0        0.0        0.0       33.9        0.0        0.3       45.1        1.2        0.0        0.0        2.6       0.64       8.79       9.97      11.32
 CFC-114          2110.0        0.0        5.5        0.3       9.94        0.0        0.0        0.0        0.0       32.8        0.0        0.3       42.5        1.1        0.0        0.0        2.4       0.65       8.73       9.92      11.27
 CFC-114          2111.0        0.0        5.2        0.3       9.89        0.0        0.0        0.0        0.0       31.7        0.0        0.3       40.0        1.1        0.0        0.0        2.3       0.65       8.67       9.87      11.23
 CFC-114          2112.0        0.0        4.9        0.3       9.84        0.0        0.0        0.0        0.0       30.7        0.0        0.2       37.8        1.0        0.0        0.0        2.2       0.65       8.62       9.82      11.18
 CFC-114          2113.0        0.0        4.6        0.2       9.79        0.0        0.0        0.0        0.0       29.7        0.0        0.2       35.6        1.0        0.0        0.0        2.0       0.66       8.56       9.76      11.14
 CFC-114          2114.0        0.0        4.4        0.2       9.74        0.0        0.0        0.0        0.0       28.8        0.0        0.2       33.6        1.0        0.0        0.0        1.9       0.66       8.51       9.71      11.09
 CFC-114          2115.0        0.0        4.1        0.2       9.68        0.0        0.0        0.0        0.0       27.9        0.0        0.2       31.7        0.9        0.0        0.0        1.8       0.66       8.45       9.66      11.05
 CFC-114          2116.0        0.0        3.9        0.2       9.63        0.0        0.0        0.0        0.0       27.0        0.0        0.2       29.9        0.9        0.0        0.0        1.7       0.66       8.40       9.61      11.00
 CFC-114          2117.0        0.0        3.7        0.2       9.58        0.0        0.0        0.0        0.0       26.2        0.0        0.1       28.2        0.9        0.0        0.0        1.6       0.67       8.34       9.56      10.96
 CFC-114          2118.0        0.0        3.5        0.2       9.53        0.0        0.0        0.0        0.0       25.4        0.0        0.1       26.6        0.8        0.0        0.0        1.5       0.67       8.29       9.51      10.91
 CFC-114          2119.0        0.0        3.3        0.2       9.48        0.0        0.0        0.0        0.0       24.6        0.0        0.1       25.0        0.8        0.0        0.0        1.4       0.67       8.23       9.46      10.87
 CFC-114          2120.0        0.0        3.2        0.2       9.43        0.0        0.0        0.0        0.0       23.8        0.0        0.1       23.6        0.8        0.0        0.0        1.3       0.67       8.18       9.41      10.83
 
 Species            Year  Prod_mean  Bank_mean  Emis_mean   Mix_mean  Prod_stdv  Prod_2.5p   Prod_50p Prod_97.5p  Bank_stdv  Bank_2.5p   Bank_50p Bank_97.5p  Emis_stdv  Emis_2.5p   Emis_50p Emis_97.5p   Mix_stdv   Mix_2.5p    Mix_50p  Mix_97.5p
 CFC-115          1950.0        0.0        0.0        0.0       0.00        0.0        0.0        0.0        0.0        0.0        0.0        0.0        0.0        0.0        0.0        0.0        0.0       0.00       0.00       0.00       0.00
 CFC-115          1951.0        0.0        0.0        0.0       0.00        0.0        0.0        0.0        0.0        0.0        0.0        0.0        0.0        0.0        0.0        0.0        0.0       0.00       0.00       0.00       0.00
 CFC-115          1952.0        0.0        0.0        0.0       0.00        0.0        0.0        0.0        0.0        0.0        0.0        0.0        0.0        0.0        0.0        0.0        0.0       0.00       0.00       0.00       0.00
 CFC-115          1953.0        0.0        0.0        0.0       0.00        0.0        0.0        0.0        0.0        0.0        0.0        0.0        0.0        0.0        0.0        0.0        0.0       0.00       0.00       0.00       0.00
 CFC-115          1954.0        0.0        0.0        0.0       0.00        0.0        0.0        0.0        0.0        0.0        0.0        0.0        0.0        0.0        0.0        0.0        0.0       0.00       0.00       0.00       0.00
 CFC-115          1955.0        0.0        0.0        0.0       0.00        0.0        0.0        0.0        0.0        0.0        0.0        0.0        0.0        0.0        0.0        0.0        0.0       0.00       0.00       0.00       0.00
 CFC-115          1956.0        0.0        0.0        0.0       0.00        0.0        0.0        0.0        0.0        0.0        0.0        0.0        0.0        0.0        0.0        0.0        0.0       0.00       0.00       0.00       0.00
 CFC-115          1957.0        0.0        0.0        0.0       0.00        0.0        0.0        0.0        0.0        0.0        0.0        0.0        0.0        0.0        0.0        0.0        0.0       0.00       0.00       0.00       0.00
 CFC-115          1958.0        0.0        0.0        0.0       0.00        0.0        0.0        0.0        0.0        0.0        0.0        0.0        0.0        0.0        0.0        0.0        0.0       0.00       0.00       0.00       0.00
 CFC-115          1959.0        0.0        0.0        0.0       0.00        0.0        0.0        0.0        0.0        0.0        0.0        0.0        0.0        0.0        0.0        0.0        0.0       0.00       0.00       0.00       0.00
 CFC-115          1960.0        0.0        0.0        0.0       0.00        0.0        0.0        0.0        0.0        0.0        0.0        0.0        0.0        0.0        0.0        0.0        0.0       0.00       0.00       0.00       0.00
 CFC-115          1961.0        0.0        0.0        0.0       0.00        0.0        0.0        0.0        0.0        0.0        0.0        0.0        0.0        0.0        0.0        0.0        0.0       0.00       0.00       0.00       0.00
 CFC-115          1962.0        0.0        0.0        0.0       0.00        0.0        0.0        0.0        0.0        0.0        0.0        0.0        0.0        0.0        0.0        0.0        0.0       0.00       0.00       0.00       0.00
 CFC-115          1963.0        0.0        0.0        0.0       0.00        0.0        0.0        0.0        0.0        0.0        0.0        0.0        0.0        0.0        0.0        0.0        0.0       0.00       0.00       0.00       0.00
 CFC-115          1964.0      900.0     2314.8      225.4       0.00       45.0      811.8      900.0      988.2    13588.1   -24218.2     2272.9    29076.2        6.8      212.7      225.2      239.2       0.00       0.00       0.00       0.00
 CFC-115          1965.0     1100.0     2989.5      444.5       0.01       55.0      992.2     1100.0     1207.8    13546.1   -23460.4     2946.7    29676.6       13.4      419.5      444.1      471.9       0.00       0.01       0.01       0.01
 CFC-115          1966.0     1200.0     3644.9      634.6       0.03       60.0     1082.4     1200.0     1317.6    13492.3   -22698.7     3600.6    30224.5       19.1      598.8      634.0      673.6       0.00       0.03       0.03       0.03
 CFC-115          1967.0     1400.0     4210.4      827.2       0.05       70.0     1262.8     1400.0     1537.2    13431.5   -22010.9     4166.2    30670.4       24.9      780.6      826.5      878.1       0.00       0.05       0.05       0.05
 CFC-115          1968.0     1700.0     4783.1     1047.5       0.08       85.0     1533.5     1700.0     1866.6    13359.2   -21294.7     4738.4    31100.7       31.5      988.4     1046.6     1112.0       0.00       0.08       0.08       0.08
 CFC-115          1969.0     2000.0     5435.6     1288.3       0.12       99.9     1804.1     2000.0     2195.9    13270.8   -20465.4     5388.9    31587.4       38.7     1215.6     1287.1     1367.5       0.00       0.12       0.12       0.12
 CFC-115          1970.0     2300.0     6147.3     1544.6       0.17      114.9     2074.7     2300.0     2525.3    13166.0   -19548.6     6099.5    32084.4       46.5     1457.4     1543.2     1639.5       0.00       0.17       0.17       0.17
 CFC-115          1971.0     2600.0     6902.7     1812.8       0.24      129.9     2345.3     2600.0     2854.7    13044.6   -18555.0     6854.3    32599.4       54.5     1710.4     1811.1     1924.3       0.00       0.24       0.24       0.24
 CFC-115          1972.0     3100.0     7690.0     2139.5       0.31      154.9     2796.3     3100.0     3403.7    12906.4   -17496.5     7640.8    33115.8       64.4     2018.7     2137.6     2271.1       0.00       0.31       0.31       0.31
 CFC-115          1973.0     3600.0     8650.5     2511.2       0.39      179.9     3247.3     3600.0     3952.7    12742.0   -16215.5     8602.4    33752.1       75.6     2369.3     2508.9     2665.6       0.00       0.39       0.39       0.39
 CFC-115          1974.0     4200.0     9739.3     2940.8       0.49      209.9     3788.5     4200.0     4611.5    12550.7   -14752.1     9692.8    34470.3       88.5     2774.6     2938.1     3121.7       0.00       0.49       0.49       0.49
 CFC-115          1975.0     4800.0    10998.5     3415.0       0.60      239.9     4329.7     4800.0     5270.3    12327.6   -13059.2    10953.9    35297.3      102.8     3222.0     3412.0     3625.2       0.00       0.60       0.60       0.60
 CFC-115          1976.0     5600.0    12383.5     3972.1       0.73      279.9     5051.4     5600.0     6148.7    12071.9   -11167.0    12338.8    36177.5      119.6     3747.6     3968.6     4216.5       0.00       0.73       0.73       0.73
 CFC-115          1977.0     6500.0    14011.4     2346.5       0.89      324.8     5863.2     6500.0     7136.8    11774.1    -8952.6    13968.9    37212.3       70.9     2213.3     2344.4     2491.4       0.00       0.89       0.89       0.89
 CFC-115          1978.0     7600.0    18164.9     2883.5       0.98      379.8     6855.4     7600.0     8344.6    11463.5    -4197.0    18125.4    40769.4       87.0     2720.1     2880.9     3061.4       0.00       0.98       0.98       0.98
 CFC-115          1979.0     8900.0    22881.3     5260.1       1.09      444.8     8028.1     8900.0     9772.0    11099.9     1249.8    22843.4    44762.4      158.4     4962.7     5255.5     5583.9       0.00       1.09       1.09       1.09
 CFC-115          1980.0     9342.0    26521.2     6015.1       1.30      466.9     8426.8     9342.0    10257.3    10646.4     5771.7    26480.0    47506.3      181.1     5675.0     6009.8     6385.4       0.00       1.30       1.30       1.30
 CFC-115          1981.0     9955.0    29848.1     6835.7       1.53      497.5     8979.7     9955.0    10930.3    10164.1    10038.6    29810.7    49884.8      205.9     6449.1     6829.6     7256.5       0.00       1.53       1.53       1.53
 CFC-115          1982.0    10366.0    32967.4     7653.7       1.80      518.0     9350.4    10366.0    11381.6     9645.1    14186.5    32929.4    51989.8      230.5     7220.8     7646.8     8124.9       0.00       1.80       1.80       1.80
 CFC-115          1983.0    11629.0    35679.7     8352.5       2.09      581.1    10489.7    11629.0    12768.3     9098.0    17966.3    35650.3    53628.3      251.6     7880.0     8344.9     8866.8       0.00       2.09       2.09       2.09
 CFC-115          1984.0    11221.0    38956.2     8929.0       2.42      560.8    10121.7    11221.0    12320.4     8491.2    22418.8    38924.3    55717.3      269.1     8423.9     8920.9     9479.1       0.00       2.42       2.42       2.42
 CFC-115          1985.0    10036.0    41248.2     9331.4       2.76      501.5     9052.8    10036.0    11019.3     7894.3    25876.0    41217.9    56860.0      281.4     8803.2     9323.0     9906.7       0.00       2.76       2.76       2.76
 CFC-115          1986.0    11234.0    41952.9     9726.0       3.12      561.4    10133.4    11234.0    12334.6     7340.0    27684.3    41920.3    56480.3      293.4     9175.1     9717.1    10326.1       0.00       3.12       3.12       3.12
 CFC-115          1987.0    12343.6    43460.8    10044.2       3.50      616.9    11134.3    12343.6    13553.0     6736.2    30368.8    43420.8    56809.8      303.2     9474.9    10035.1    10663.9       0.00       3.50       3.50       3.50
 CFC-115          1988.0    13453.2    45760.2    10375.7       3.89      672.3    12135.2    13453.2    14771.3     6091.1    33928.5    45718.6    57826.7      313.4     9786.9    10366.2    11016.2       0.00       3.89       3.89       3.89
 CFC-115          1989.0    14562.8    48837.6    10759.5       4.29      727.8    13136.1    14562.8    15989.6     5410.2    38336.5    48792.9    59545.0      325.2    10148.3    10749.5    11424.2       0.00       4.29       4.29       4.29
 CFC-115          1990.0    12669.0    52640.9    11013.1       4.70      633.1    11427.8    12669.0    13910.2     4702.9    43525.2    52604.9    61977.7      333.2    10387.0    11002.8    11693.9       0.00       4.70       4.70       4.70
 CFC-115          1991.0    11440.0    54296.8    11281.3       5.13      571.7    10319.2    11440.0    12560.8     4080.1    46391.7    54257.6    62415.0      341.6    10639.3    11270.9    11979.1       0.00       5.13       5.13       5.13
 CFC-115          1992.0    11654.0    54455.5    11278.6       5.56      582.4    10512.3    11654.0    12795.8     3519.6    47644.9    54422.1    61465.8      341.9    10635.7    11268.2    11976.9       0.00       5.56       5.56       5.56
 CFC-115          1993.0    10659.0    54830.9    11019.6       5.99      532.7     9614.7    10659.0    11703.3     2996.7    49030.9    54797.3    60794.1      334.7    10390.2    11009.4    11703.3       0.00       5.99       5.99       5.99
 CFC-115          1994.0     8981.1    54470.3    10067.0       6.41      448.8     8101.2     8981.1     9861.0     2565.1    49510.4    54441.4    59564.8      306.9     9489.9    10057.6    10693.5       0.00       6.41       6.41       6.41
 CFC-115          1995.0     1901.2    53384.4     8148.1       6.80       95.0     1714.9     1901.2     2087.5     2256.3    49022.6    53361.7    57865.6      250.9     7676.4     8140.4     8660.4       0.00       6.80       6.80       6.80
 CFC-115          1996.0      829.0    47137.5     6703.9       7.11       41.4      747.8      829.0      910.2     2087.3    43088.8    47122.0    51262.8      209.3     6310.2     6697.6     7131.0       0.00       7.11       7.11       7.11
 CFC-115          1997.0      659.0    41262.6     5591.2       7.36       32.9      594.4      659.0      723.6     1963.8    37443.1    41252.9    45131.9      178.0     5256.3     5585.8     5954.0       0.00       7.36       7.36       7.36
 CFC-115          1998.0      604.0    36330.4     4878.4       7.56       30.2      544.8      604.0      663.2     1869.4    32690.9    36324.9    40002.0      158.6     4579.6     4873.7     5202.2       0.00       7.56       7.56       7.56
 CFC-115          1999.0      613.0    32056.0     4429.9       7.74       30.6      552.9      613.0      673.1     1794.7    28559.0    32052.1    35572.5      146.8     4152.8     4425.7     4729.9       0.00       7.74       7.74       7.74
 CFC-115          2000.0      475.0    28239.1     3533.9       7.90       23.7      428.5      475.0      521.5     1734.8    24843.7    28236.5    31632.5      123.6     3300.4     3530.7     3785.7       0.00       7.90       7.90       7.90
 CFC-115          2001.0      449.0    25180.1      874.6       8.02       22.4      405.0      449.0      493.0     1691.2    21865.4    25178.9    28488.3       69.5      740.4      873.8     1013.2       0.00       8.02       8.02       8.02
 CFC-115          2002.0      230.0    24754.6     1777.2       8.04       11.5      207.5      230.0      252.5     1668.7    21482.9    24754.6    28015.0       83.7     1617.2     1775.4     1946.3       0.00       8.04       8.04       8.04
 CFC-115          2003.0      325.7    23207.4     3882.7       8.10       16.3      293.8      325.7      357.6     1644.9    19982.0    23208.6    26420.6      133.5     3630.6     3879.2     4155.2       0.00       8.10       8.10       8.10
 CFC-115          2004.0      318.8    19650.3     2743.0       8.23       15.9      287.6      318.8      350.0     1618.5    16476.2    19650.8    22815.2      105.6     2542.9     2740.4     2957.9       0.00       8.23       8.23       8.23
 CFC-115          2005.0      219.1    17226.1      723.4       8.33       10.9      197.6      219.1      240.6     1603.5    14083.7    17226.1    20366.9       70.2      587.4      722.8      863.1       0.00       8.33       8.33       8.33
 CFC-115          2006.0      170.5    16721.8      796.3       8.34        8.5      153.8      170.5      187.2     1595.6    13591.6    16721.9    19848.2       71.0      658.9      795.6      937.8       0.00       8.34       8.34       8.34
 CFC-115          2007.0      199.7    16096.0      395.7       8.36       10.0      180.1      199.7      219.3     1590.8    12979.3    16096.5    19214.8       68.0      263.0      395.4      530.3       0.00       8.36       8.36       8.36
 CFC-115          2008.0        0.0    15900.0      438.3       8.36        0.0        0.0        0.0        0.0     1589.2    12784.5    15900.0    19015.5       68.3      305.2      437.9      573.4       0.00       8.36       8.36       8.36
 CFC-115          2009.0        0.0    15461.7     1244.1       8.36        0.0        0.0        0.0        0.0     1590.4    12344.2    15461.7    18581.1      136.5      983.2     1241.8     1517.4       0.00       8.36       8.36       8.36
 CFC-115          2010.0        0.0    14217.6     1142.4       8.39        0.0        0.0        0.0        0.0     1553.3    11179.8    14214.5    17271.0      118.1      915.0     1140.8     1378.1       0.01       8.38       8.39       8.40
 CFC-115          2011.0        0.0    13075.2     1049.2       8.42        0.0        0.0        0.0        0.0     1520.7    10110.2    13069.2    16077.9      102.8      850.5     1048.3     1253.7       0.01       8.40       8.42       8.44
 CFC-115          2012.0        0.0    12026.0      963.7       8.45        0.0        0.0        0.0        0.0     1489.8     9130.9    12015.3    14977.7       90.1      789.2      963.0     1142.5       0.01       8.42       8.45       8.48
 CFC-115          2013.0        0.0    11062.3      885.3       8.47        0.0        0.0        0.0        0.0     1459.2     8239.5    11046.6    13963.7       79.8      730.5      884.7     1042.8       0.02       8.43       8.47       8.51
 CFC-115          2014.0        0.0    10177.0      813.3       8.49        0.0        0.0        0.0        0.0     1427.8     7431.3    10155.4    13030.1       71.6      674.3      813.0      954.4       0.02       8.44       8.49       8.53
 CFC-115          2015.0        0.0     9363.7      747.3       8.50        0.0        0.0        0.0        0.0     1395.1     6698.6     9338.0    12168.2       65.2      620.2      747.0      875.3       0.03       8.45       8.50       8.55
 CFC-115          2016.0        0.0     8616.4      686.7       8.52        0.0        0.0        0.0        0.0     1360.7     6036.3     8585.1    11368.8       60.2      568.7      686.6      804.3       0.03       8.46       8.52       8.57
 CFC-115          2017.0        0.0     7929.7      631.1       8.53        0.0        0.0        0.0        0.0     1324.8     5435.0     7892.4    10627.8       56.5      519.5      631.4      740.7       0.03       8.47       8.53       8.59
 CFC-115          2018.0        0.0     7298.6      580.1       8.54        0.0        0.0        0.0        0.0     1287.4     4892.6     7256.9     9940.2       53.7      473.0      580.6      683.4       0.04       8.47       8.54       8.61
 CFC-115          2019.0        0.0     6718.5      533.3       8.54        0.0        0.0        0.0        0.0     1248.7     4402.1     6672.7     9294.7       51.5      429.7      534.0      631.9       0.04       8.47       8.55       8.62
 CFC-115          2020.0        0.0     6185.2      490.3       8.55        0.0        0.0        0.0        0.0     1209.0     3960.1     6134.6     8694.2       49.8      389.4      491.3      585.1       0.04       8.47       8.55       8.63
 CFC-115          2021.0        0.0     5695.0      450.8       8.55        0.0        0.0        0.0        0.0     1168.5     3561.2     5640.4     8134.8       48.4      352.0      452.0      542.7       0.04       8.47       8.55       8.64
 CFC-115          2022.0        0.0     5244.2      414.6       8.56        0.0        0.0        0.0        0.0     1127.5     3203.0     5185.8     7611.9       47.2      318.0      415.8      503.8       0.05       8.46       8.56       8.65
 CFC-115          2023.0        0.0     4829.6      381.3       8.56        0.0        0.0        0.0        0.0     1086.2     2878.7     4767.6     7126.5       46.1      287.0      382.6      468.3       0.05       8.46       8.56       8.65
 CFC-115          2024.0        0.0     4448.3      350.7       8.56        0.0        0.0        0.0        0.0     1044.8     2587.5     4383.7     6671.8       45.1      258.9      351.9      435.8       0.05       8.45       8.56       8.66
 CFC-115          2025.0        0.0     4097.6      322.6       8.55        0.0        0.0        0.0        0.0     1003.6     2326.1     4029.8     6244.4       44.0      233.3      323.7      405.9       0.05       8.44       8.55       8.66
 CFC-115          2026.0        0.0     3775.0      296.8       8.55        0.0        0.0        0.0        0.0      962.8     2089.4     3704.9     5848.9       43.0      210.2      297.7      378.4       0.06       8.44       8.55       8.66
 CFC-115          2027.0        0.0     3478.2      273.1       8.55        0.0        0.0        0.0        0.0      922.5     1878.4     3406.0     5479.4       41.9      189.3      273.8      353.0       0.06       8.43       8.55       8.66
 CFC-115          2028.0        0.0     3205.0      251.3       8.54        0.0        0.0        0.0        0.0      882.8     1688.3     3131.4     5132.5       40.7      170.3      251.8      329.5       0.06       8.42       8.54       8.66
 CFC-115          2029.0        0.0     2953.7      231.3       8.53        0.0        0.0        0.0        0.0      844.0     1517.2     2879.1     4808.7       39.5      153.2      231.6      307.7       0.07       8.41       8.53       8.66
 CFC-115          2030.0        0.0     2722.4      212.9       8.53        0.0        0.0        0.0        0.0      806.0     1362.9     2647.2     4505.5       38.3      137.8      213.0      287.5       0.07       8.39       8.53       8.66
 CFC-115          2031.0        0.0     2509.5      196.0       8.52        0.0        0.0        0.0        0.0      769.0     1223.8     2434.1     4221.9       37.1      123.9      195.8      268.8       0.07       8.38       8.52       8.66
 CFC-115          2032.0        0.0     2313.5      180.5       8.51        0.0        0.0        0.0        0.0      733.1     1099.0     2238.0     3955.5       35.8      111.4      180.1      251.4       0.07       8.37       8.51       8.66
 CFC-115          2033.0        0.0     2133.0      166.2       8.50        0.0        0.0        0.0        0.0      698.3      987.5     2057.8     3706.9       34.6      100.2      165.6      235.2       0.08       8.35       8.50       8.65
 CFC-115          2034.0        0.0     1966.9      153.0       8.49        0.0        0.0        0.0        0.0      664.6      887.2     1892.0     3474.1       33.3       90.0      152.3      220.0       0.08       8.34       8.50       8.65
 CFC-115          2035.0        0.0     1813.8      140.9       8.49        0.0        0.0        0.0        0.0      632.1      796.9     1739.8     3255.4       32.0       80.9      140.0      205.9       0.08       8.32       8.49       8.65
 CFC-115          2036.0        0.0     1672.9      129.8       8.48        0.0        0.0        0.0        0.0      600.7      716.0     1599.4     3050.0       30.8       72.7      128.7      192.6       0.08       8.31       8.48       8.64
 CFC-115          2037.0        0.0     1543.1      119.6       8.46        0.0        0.0        0.0        0.0      570.6      643.3     1470.5     2858.8       29.5       65.4      118.4      180.3       0.09       8.29       8.46       8.64
 CFC-115          2038.0        0.0     1423.6      110.2       8.45        0.0        0.0        0.0        0.0      541.6      577.8     1352.2     2679.2       28.3       58.7      108.8      168.8       0.09       8.28       8.45       8.63
 CFC-115          2039.0        0.0     1313.4      101.5       8.44        0.0        0.0        0.0        0.0      513.8      519.0     1243.2     2510.6       27.1       52.8      100.1      158.1       0.09       8.26       8.44       8.62
 CFC-115          2040.0        0.0     1211.9       93.5       8.43        0.0        0.0        0.0        0.0      487.2      466.2     1143.1     2352.8       25.9       47.4       92.0      148.0       0.10       8.24       8.43       8.62
 CFC-115          2041.0        0.0     1118.4       86.2       8.42        0.0        0.0        0.0        0.0      461.7      418.9     1051.0     2204.8       24.7       42.6       84.6      138.6       0.10       8.23       8.42       8.61
 CFC-115          2042.0        0.0     1032.1       79.5       8.41        0.0        0.0        0.0        0.0      437.4      376.3      966.1     2066.3       23.6       38.2       77.8      129.9       0.10       8.21       8.41       8.60
 CFC-115          2043.0        0.0      952.7       73.2       8.39        0.0        0.0        0.0        0.0      414.1      337.9      888.1     1936.3       22.5       34.3       71.5      121.7       0.10       8.19       8.39       8.60
 CFC-115          2044.0        0.0      879.5       67.5       8.38        0.0        0.0        0.0        0.0      391.9      303.4      816.5     1815.0       21.4       30.9       65.8      114.0       0.11       8.18       8.38       8.59
 CFC-115          2045.0        0.0      811.9       62.3       8.37        0.0        0.0        0.0        0.0      370.8      272.5      750.7     1701.3       20.4       27.7       60.5      106.8       0.11       8.16       8.37       8.58
 CFC-115          2046.0        0.0      749.7       57.4       8.36        0.0        0.0        0.0        0.0      350.7      244.6      690.2     1595.2       19.4       24.9       55.6      100.1       0.11       8.14       8.36       8.57
 CFC-115          2047.0        0.0      692.3       52.9       8.34        0.0        0.0        0.0        0.0      331.6      219.7      634.6     1495.2       18.4       22.4       51.1       93.8       0.11       8.12       8.34       8.56
 CFC-115          2048.0        0.0      639.3       48.8       8.33        0.0        0.0        0.0        0.0      313.4      197.3      583.4     1401.2       17.5       20.1       47.0       87.9       0.12       8.11       8.33       8.56
 CFC-115          2049.0        0.0      590.5       45.0       8.32        0.0        0.0        0.0        0.0      296.1      177.2      536.3     1313.4       16.6       18.1       43.2       82.4       0.12       8.09       8.32       8.55
 CFC-115          2050.0        0.0      545.4       41.6       8.30        0.0        0.0        0.0        0.0      279.7      159.0      493.0     1230.9       15.7       16.2       39.7       77.2       0.12       8.07       8.30       8.54
 CFC-115          2051.0        0.0      503.9       38.3       8.29        0.0        0.0        0.0        0.0      264.1      142.8      453.3     1153.8       14.9       14.6       36.5       72.4       0.12       8.05       8.29       8.53
 CFC-115          2052.0        0.0      465.6       35.4       8.27        0.0        0.0        0.0        0.0      249.3      128.2      416.7     1081.6       14.1       13.1       33.6       67.8       0.12       8.03       8.27       8.52
 CFC-115          2053.0        0.0      430.2       32.6       8.26        0.0        0.0        0.0        0.0      235.3      115.1      383.2     1014.0       13.4       11.8       30.9       63.6       0.13       8.01       8.26       8.51
 CFC-115          2054.0        0.0      397.5       30.1       8.25        0.0        0.0        0.0        0.0      222.0      103.3      352.3      950.5       12.7       10.6       28.4       59.6       0.13       8.00       8.25       8.50
 CFC-115          2055.0        0.0      367.4       27.8       8.23        0.0        0.0        0.0        0.0      209.5       92.8      323.9      890.9       12.0        9.5       26.1       55.8       0.13       7.98       8.23       8.49
 CFC-115          2056.0        0.0      339.6       25.7       8.22        0.0        0.0        0.0        0.0      197.6       83.3      297.8      835.1       11.4        8.5       24.0       52.3       0.13       7.96       8.22       8.48
 CFC-115          2057.0        0.0      313.9       23.7       8.20        0.0        0.0        0.0        0.0      186.3       74.8      273.8      782.9       10.7        7.6       22.1       49.0       0.14       7.94       8.20       8.47
 CFC-115          2058.0        0.0      290.2       21.9       8.19        0.0        0.0        0.0        0.0      175.7       67.2      251.7      734.1       10.1        6.9       20.3       45.9       0.14       7.92       8.19       8.46
 CFC-115          2059.0        0.0      268.3       20.2       8.18        0.0        0.0        0.0        0.0      165.6       60.3      231.5      688.2        9.6        6.2       18.7       43.1       0.14       7.90       8.18       8.45
 CFC-115          2060.0        0.0      248.1       18.7       8.16        0.0        0.0        0.0        0.0      156.1       54.1      212.8      645.2        9.1        5.5       17.1       40.4       0.14       7.89       8.16       8.44
 CFC-115          2061.0        0.0      229.5       17.2       8.15        0.0        0.0        0.0        0.0      147.1       48.6      195.7      605.1        8.6        5.0       15.8       37.9       0.15       7.87       8.15       8.43
 CFC-115          2062.0        0.0      212.2       15.9       8.13        0.0        0.0        0.0        0.0      138.7       43.7      179.9      567.2        8.1        4.5       14.5       35.5       0.15       7.85       8.13       8.43
 CFC-115          2063.0        0.0      196.3       14.7       8.12        0.0        0.0        0.0        0.0      130.7       39.2      165.4      531.8        7.6        4.0       13.3       33.2       0.15       7.83       8.12       8.42
 CFC-115          2064.0        0.0      181.6       13.6       8.10        0.0        0.0        0.0        0.0      123.1       35.2      152.1      498.6        7.2        3.6       12.3       31.2       0.15       7.81       8.10       8.41
 CFC-115          2065.0        0.0      168.0       12.6       8.09        0.0        0.0        0.0        0.0      115.9       31.6      139.8      467.5        6.8        3.2       11.3       29.2       0.15       7.79       8.09       8.40
 CFC-115          2066.0        0.0      155.5       11.6       8.08        0.0        0.0        0.0        0.0      109.2       28.4      128.5      438.4        6.4        2.9       10.4       27.4       0.16       7.77       8.07       8.39
 CFC-115          2067.0        0.0      143.9       10.7       8.06        0.0        0.0        0.0        0.0      102.9       25.5      118.2      410.9        6.0        2.6        9.5       25.7       0.16       7.76       8.06       8.38
 CFC-115          2068.0        0.0      133.1        9.9       8.05        0.0        0.0        0.0        0.0       96.9       22.9      108.6      385.3        5.7        2.3        8.8       24.1       0.16       7.74       8.05       8.37
 CFC-115          2069.0        0.0      123.2        9.2       8.03        0.0        0.0        0.0        0.0       91.2       20.5       99.9      361.2        5.4        2.1        8.0       22.6       0.16       7.72       8.03       8.36
 CFC-115          2070.0        0.0      114.1        8.5       8.02        0.0        0.0        0.0        0.0       85.9       18.5       91.8      338.7        5.1        1.9        7.4       21.1       0.16       7.70       8.02       8.34
 CFC-115          2071.0        0.0      105.6        7.8       8.00        0.0        0.0        0.0        0.0       80.9       16.6       84.4      317.5        4.8        1.7        6.8       19.8       0.17       7.68       8.00       8.33
 CFC-115          2072.0        0.0       97.8        7.2       7.99        0.0        0.0        0.0        0.0       76.1       14.9       77.6      297.7        4.5        1.5        6.3       18.6       0.17       7.66       7.99       8.32
 CFC-115          2073.0        0.0       90.5        6.7       7.97        0.0        0.0        0.0        0.0       71.7       13.4       71.4      279.2        4.2        1.4        5.8       17.4       0.17       7.64       7.97       8.31
 CFC-115          2074.0        0.0       83.8        6.2       7.96        0.0        0.0        0.0        0.0       67.5       12.0       65.6      261.7        4.0        1.2        5.3       16.3       0.17       7.63       7.96       8.30
 CFC-115          2075.0        0.0       77.6        5.7       7.95        0.0        0.0        0.0        0.0       63.5       10.8       60.3      245.4        3.8        1.1        4.9       15.3       0.18       7.61       7.94       8.29
 CFC-115          2076.0        0.0       71.9        5.3       7.93        0.0        0.0        0.0        0.0       59.8        9.7       55.4      230.1        3.5        1.0        4.5       14.4       0.18       7.59       7.93       8.28
 CFC-115          2077.0        0.0       66.6        4.9       7.92        0.0        0.0        0.0        0.0       56.3        8.7       51.0      215.7        3.3        0.9        4.1       13.5       0.18       7.57       7.91       8.27
 CFC-115          2078.0        0.0       61.7        4.5       7.90        0.0        0.0        0.0        0.0       53.0        7.8       46.9      202.3        3.1        0.8        3.8       12.6       0.18       7.55       7.90       8.26
 CFC-115          2079.0        0.0       57.2        4.2       7.89        0.0        0.0        0.0        0.0       49.9        7.0       43.1      189.6        3.0        0.7        3.5       11.8       0.18       7.53       7.89       8.25
 CFC-115          2080.0        0.0       53.0        3.9       7.87        0.0        0.0        0.0        0.0       46.9        6.3       39.6      177.9        2.8        0.6        3.2       11.1       0.19       7.52       7.87       8.24
 CFC-115          2081.0        0.0       49.1        3.6       7.86        0.0        0.0        0.0        0.0       44.2        5.6       36.4      166.8        2.6        0.6        2.9       10.4       0.19       7.50       7.86       8.23
 CFC-115          2082.0        0.0       45.5        3.3       7.84        0.0        0.0        0.0        0.0       41.6        5.1       33.5      156.5        2.5        0.5        2.7        9.8       0.19       7.48       7.84       8.22
 CFC-115          2083.0        0.0       42.2        3.1       7.83        0.0        0.0        0.0        0.0       39.1        4.6       30.8      146.7        2.3        0.5        2.5        9.1       0.19       7.46       7.83       8.21
 CFC-115          2084.0        0.0       39.1        2.9       7.82        0.0        0.0        0.0        0.0       36.8        4.1       28.3      137.5        2.2        0.4        2.3        8.6       0.19       7.44       7.81       8.20
 CFC-115          2085.0        0.0       36.2        2.6       7.80        0.0        0.0        0.0        0.0       34.6        3.7       26.0      128.9        2.1        0.4        2.1        8.0       0.20       7.43       7.80       8.19
 CFC-115          2086.0        0.0       33.6        2.4       7.79        0.0        0.0        0.0        0.0       32.6        3.3       23.9      120.9        1.9        0.3        1.9        7.5       0.20       7.41       7.79       8.18
 CFC-115          2087.0        0.0       31.1        2.3       7.77        0.0        0.0        0.0        0.0       30.7        3.0       22.0      113.3        1.8        0.3        1.8        7.1       0.20       7.39       7.77       8.17
 CFC-115          2088.0        0.0       28.9        2.1       7.76        0.0        0.0        0.0        0.0       28.9        2.7       20.2      106.2        1.7        0.3        1.6        6.6       0.20       7.37       7.76       8.16
 CFC-115          2089.0        0.0       26.8        1.9       7.75        0.0        0.0        0.0        0.0       27.2        2.4       18.6       99.6        1.6        0.2        1.5        6.2       0.20       7.35       7.74       8.15
 CFC-115          2090.0        0.0       24.8        1.8       7.73        0.0        0.0        0.0        0.0       25.6        2.1       17.1       93.4        1.5        0.2        1.4        5.8       0.21       7.34       7.73       8.14
 CFC-115          2091.0        0.0       23.0        1.7       7.72        0.0        0.0        0.0        0.0       24.1        1.9       15.7       87.6        1.4        0.2        1.3        5.5       0.21       7.32       7.71       8.13
 CFC-115          2092.0        0.0       21.4        1.5       7.70        0.0        0.0        0.0        0.0       22.7        1.7       14.5       82.1        1.3        0.2        1.2        5.1       0.21       7.30       7.70       8.12
 CFC-115          2093.0        0.0       19.8        1.4       7.69        0.0        0.0        0.0        0.0       21.3        1.5       13.3       77.0        1.3        0.2        1.1        4.8       0.21       7.28       7.69       8.11
 CFC-115          2094.0        0.0       18.4        1.3       7.67        0.0        0.0        0.0        0.0       20.1        1.4       12.2       72.2        1.2        0.1        1.0        4.5       0.21       7.26       7.67       8.10
 CFC-115          2095.0        0.0       17.1        1.2       7.66        0.0        0.0        0.0        0.0       18.9        1.2       11.2       67.7        1.1        0.1        0.9        4.2       0.22       7.25       7.66       8.09
 CFC-115          2096.0        0.0       15.8        1.1       7.65        0.0        0.0        0.0        0.0       17.8        1.1       10.3       63.5        1.1        0.1        0.8        4.0       0.22       7.23       7.64       8.08
 CFC-115          2097.0        0.0       14.7        1.1       7.63        0.0        0.0        0.0        0.0       16.7        1.0        9.5       59.5        1.0        0.1        0.8        3.7       0.22       7.21       7.63       8.07
 CFC-115          2098.0        0.0       13.7        1.0       7.62        0.0        0.0        0.0        0.0       15.8        0.9        8.7       55.8        0.9        0.1        0.7        3.5       0.22       7.19       7.62       8.06
 CFC-115          2099.0        0.0       12.7        0.9       7.60        0.0        0.0        0.0        0.0       14.8        0.8        8.0       52.3        0.9        0.1        0.6        3.3       0.22       7.18       7.60       8.05
 CFC-115          2100.0        0.0       11.8        0.8       7.59        0.0        0.0        0.0        0.0       14.0        0.7        7.4       49.1        0.8        0.1        0.6        3.1       0.23       7.16       7.59       8.04
 CFC-115          2101.0        0.0       10.9        0.8       7.58        0.0        0.0        0.0        0.0       13.1        0.7        6.8       46.0        0.8        0.1        0.5        2.9       0.23       7.14       7.57       8.03
 CFC-115          2102.0        0.0       10.1        0.7       7.56        0.0        0.0        0.0        0.0       12.4        0.6        6.2       43.1        0.7        0.1        0.5        2.7       0.23       7.12       7.56       8.02
 CFC-115          2103.0        0.0        9.4        0.7       7.55        0.0        0.0        0.0        0.0       11.6        0.5        5.7       40.4        0.7        0.1        0.5        2.5       0.23       7.11       7.54       8.01
 CFC-115          2104.0        0.0        8.7        0.6       7.53        0.0        0.0        0.0        0.0       11.0        0.5        5.3       37.9        0.6        0.0        0.4        2.4       0.23       7.09       7.53       8.00
 CFC-115          2105.0        0.0        8.1        0.6       7.52        0.0        0.0        0.0        0.0       10.3        0.4        4.8       35.6        0.6        0.0        0.4        2.2       0.23       7.07       7.52       7.99
 CFC-115          2106.0        0.0        7.5        0.5       7.51        0.0        0.0        0.0        0.0        9.7        0.4        4.5       33.3        0.6        0.0        0.4        2.1       0.24       7.05       7.50       7.98
 CFC-115          2107.0        0.0        7.0        0.5       7.49        0.0        0.0        0.0        0.0        9.2        0.3        4.1       31.3        0.5        0.0        0.3        1.9       0.24       7.04       7.49       7.97
 CFC-115          2108.0        0.0        6.5        0.5       7.48        0.0        0.0        0.0        0.0        8.6        0.3        3.8       29.3        0.5        0.0        0.3        1.8       0.24       7.02       7.48       7.96
 CFC-115          2109.0        0.0        6.1        0.4       7.47        0.0        0.0        0.0        0.0        8.1        0.3        3.5       27.5        0.5        0.0        0.3        1.7       0.24       7.00       7.46       7.95
 CFC-115          2110.0        0.0        5.6        0.4       7.45        0.0        0.0        0.0        0.0        7.6        0.2        3.2       25.8        0.4        0.0        0.3        1.6       0.24       6.99       7.45       7.94
 CFC-115          2111.0        0.0        5.2        0.4       7.44        0.0        0.0        0.0        0.0        7.2        0.2        2.9       24.2        0.4        0.0        0.2        1.5       0.25       6.97       7.43       7.93
 CFC-115          2112.0        0.0        4.9        0.3       7.42        0.0        0.0        0.0        0.0        6.8        0.2        2.7       22.7        0.4        0.0        0.2        1.4       0.25       6.95       7.42       7.92
 CFC-115          2113.0        0.0        4.5        0.3       7.41        0.0        0.0        0.0        0.0        6.4        0.2        2.5       21.3        0.4        0.0        0.2        1.3       0.25       6.93       7.41       7.91
 CFC-115          2114.0        0.0        4.2        0.3       7.40        0.0        0.0        0.0        0.0        6.0        0.2        2.3       19.9        0.4        0.0        0.2        1.2       0.25       6.92       7.39       7.90
 CFC-115          2115.0        0.0        3.9        0.3       7.38        0.0        0.0        0.0        0.0        5.7        0.1        2.1       18.7        0.3        0.0        0.2        1.2       0.25       6.90       7.38       7.89
 CFC-115          2116.0        0.0        3.6        0.3       7.37        0.0        0.0        0.0        0.0        5.3        0.1        1.9       17.5        0.3        0.0        0.2        1.1       0.26       6.88       7.37       7.88
 CFC-115          2117.0        0.0        3.4        0.2       7.36        0.0        0.0        0.0        0.0        5.0        0.1        1.8       16.4        0.3        0.0        0.1        1.0       0.26       6.87       7.35       7.87
 CFC-115          2118.0        0.0        3.1        0.2       7.34        0.0        0.0        0.0        0.0        4.7        0.1        1.6       15.4        0.3        0.0        0.1        1.0       0.26       6.85       7.34       7.86
 CFC-115          2119.0        0.0        2.9        0.2       7.33        0.0        0.0        0.0        0.0        4.5        0.1        1.5       14.4        0.3        0.0        0.1        0.9       0.26       6.83       7.33       7.85
 CFC-115          2120.0        0.0        2.7        0.2       7.32        0.0        0.0        0.0        0.0        4.2        0.1        1.4       13.5        0.2        0.0        0.1        0.8       0.26       6.82       7.31       7.84
 
 Species            Year  Prod_mean  Bank_mean  Emis_mean   Mix_mean  Prod_stdv  Prod_2.5p   Prod_50p Prod_97.5p  Bank_stdv  Bank_2.5p   Bank_50p Bank_97.5p  Emis_stdv  Emis_2.5p   Emis_50p Emis_97.5p   Mix_stdv   Mix_2.5p    Mix_50p  Mix_97.5p
 CCl4             1950.0   953700.0        0.0    91644.6      34.54    47659.6   860264.0   953700.5  1047138.4        0.0        0.0        0.0        0.0     4546.0    82937.9    91553.7   100813.3       0.00      34.54      34.54      34.54
 CCl4             1951.0    65000.0        0.0    60181.9      36.96     3248.3    58631.8    65000.0    71368.4        0.0        0.0        0.0        0.0     4209.7    52082.4    60120.9    68619.8       0.00      36.96      36.96      36.96
 CCl4             1952.0    70000.0        0.0    65030.0      38.09     3498.1    63142.0    70000.0    76858.2        0.0        0.0        0.0        0.0     4382.4    56597.5    64961.2    73820.6       0.00      38.09      38.09      38.09
 CCl4             1953.0    75000.0        0.0    69859.5      39.36     3748.0    67652.1    75000.0    82348.1        0.0        0.0        0.0        0.0     4569.6    61067.9    69788.9    79026.1       0.00      39.36      39.36      39.36
 CCl4             1954.0    80000.0        0.0    74670.0      40.78     3997.9    72162.2    80000.0    87838.0        0.0        0.0        0.0        0.0     4770.3    65495.4    74595.2    84249.6       0.00      40.78      40.78      40.78
 CCl4             1955.0    85000.0        0.0    79462.5      42.34     4247.7    76672.4    85000.0    93327.8        0.0        0.0        0.0        0.0     4983.7    69878.8    79384.3    89480.9       0.00      42.34      42.34      42.34
 CCl4             1956.0    90000.0        0.0    84238.3      44.04     4497.6    81182.5    90000.0    98817.7        0.0        0.0        0.0        0.0     5209.0    74227.2    84155.4    94712.3       0.00      44.04      44.04      44.04
 CCl4             1957.0    95000.0        0.0    88997.1      45.87     4747.5    85692.6    95000.0   104307.6        0.0        0.0        0.0        0.0     5445.6    78531.4    88909.9    99950.7       0.00      45.87      45.87      45.87
 CCl4             1958.0   100000.0        0.0    93740.2      47.82     4997.3    90202.8   100000.0   109797.5        0.0        0.0        0.0        0.0     5693.0    82803.8    93649.5   105191.8       0.00      47.82      47.82      47.82
 CCl4             1959.0   105000.0        0.0    98467.9      49.89     5247.2    94712.9   105000.0   115287.3        0.0        0.0        0.0        0.0     5950.6    87037.0    98372.5   110442.7       0.00      49.89      49.89      49.89
 CCl4             1960.0   110000.0        0.0   103181.2      52.08     5497.1    99223.1   110000.0   120777.2        0.0        0.0        0.0        0.0     6218.0    91237.3   103081.6   115692.3       0.00      52.08      52.08      52.08
 CCl4             1961.0   115000.0        0.0   107879.6      54.37     5746.9   103733.2   115000.1   126267.1        0.0        0.0        0.0        0.0     6494.8    95402.8   107775.8   120948.1       0.00      54.37      54.37      54.37
 CCl4             1962.0   119000.0        0.0   111566.8      56.78     5946.8   107341.3   119000.1   130659.0        0.0        0.0        0.0        0.0     6764.1    98572.6   111458.5   125177.1       0.00      56.78      56.78      56.78
 CCl4             1963.0   123000.0        0.0   115245.4      59.25     6146.7   110949.4   123000.1   135050.9        0.0        0.0        0.0        0.0     7039.0   101719.2   115132.3   129404.9       0.00      59.25      59.25      59.25
 CCl4             1964.0   127000.0        0.0   118915.8      61.78     6346.6   114557.5   127000.1   139442.8        0.0        0.0        0.0        0.0     7319.3   104846.2   118799.1   133636.2       0.00      61.78      61.78      61.78
 CCl4             1965.0   127000.0        0.0   118586.1      64.37     6346.6   114557.5   127000.1   139442.8        0.0        0.0        0.0        0.0     7541.0   104083.9   118468.0   133731.1       0.00      64.37      64.37      64.37
 CCl4             1966.0   127000.0        0.0   118267.9      66.86     6346.6   114557.5   127000.1   139442.8        0.0        0.0        0.0        0.0     7756.4   103343.5   118148.1   133827.5       0.00      66.86      66.86      66.86
 CCl4             1967.0   127000.0        0.0   117962.2      69.26     6346.6   114557.5   127000.1   139442.8        0.0        0.0        0.0        0.0     7965.5   102633.9   117837.2   133937.7       0.00      69.26      69.26      69.26
 CCl4             1968.0   127000.0        0.0   117667.8      71.57     6346.6   114557.5   127000.1   139442.8        0.0        0.0        0.0        0.0     8168.3   101953.5   117546.8   134040.6       0.00      71.57      71.57      71.57
 CCl4             1969.0   127000.0        0.0   117384.9      73.79     6346.6   114557.5   127000.1   139442.8        0.0        0.0        0.0        0.0     8364.8   101281.3   117264.6   134143.9       0.00      73.79      73.79      73.79
 CCl4             1970.0   127000.0        0.0   117112.5      75.93     6346.6   114557.5   127000.1   139442.8        0.0        0.0        0.0        0.0     8555.1   100647.2   116988.6   134260.6       0.00      75.93      75.93      75.93
 CCl4             1971.0   127000.0        0.0   116850.0      77.99     6346.6   114557.5   127000.1   139442.8        0.0        0.0        0.0        0.0     8739.1   100017.5   116729.1   134362.1       0.00      77.99      77.99      77.99
 CCl4             1972.0   127000.0        0.0   116598.1      79.97     6346.6   114557.5   127000.1   139442.8        0.0        0.0        0.0        0.0     8917.1    99413.0   116474.4   134450.1       0.00      79.97      79.97      79.97
 CCl4             1973.0   127000.0        0.0   116355.0      81.87     6346.6   114557.5   127000.1   139442.8        0.0        0.0        0.0        0.0     9089.1    98821.2   116229.7   134544.6       0.00      81.87      81.87      81.87
 CCl4             1974.0   127000.0        0.0   116121.5      83.70     6346.6   114557.5   127000.1   139442.8        0.0        0.0        0.0        0.0     9255.3    98265.2   115995.5   134639.2       0.00      83.70      83.70      83.70
 CCl4             1975.0   127000.0        0.0   115896.5      85.47     6346.6   114557.5   127000.1   139442.8        0.0        0.0        0.0        0.0     9415.8    97729.2   115773.6   134730.6       0.00      85.47      85.47      85.47
 CCl4             1976.0   127000.0        0.0   115680.4      87.17     6346.6   114557.5   127000.1   139442.8        0.0        0.0        0.0        0.0     9570.8    97206.3   115555.2   134821.4       0.00      87.17      87.17      87.17
 CCl4             1977.0   127000.0        0.0   115472.1      88.80     6346.6   114557.5   127000.1   139442.8        0.0        0.0        0.0        0.0     9720.3    96718.4   115342.5   134909.4       0.00      88.80      88.80      88.80
 CCl4             1978.0   127000.0        0.0   115271.9      90.37     6346.6   114557.5   127000.1   139442.8        0.0        0.0        0.0        0.0     9864.6    96233.0   115142.1   134996.9       0.00      90.37      90.37      90.37
 CCl4             1979.0   127000.0        0.0   115079.4      91.88     6346.6   114557.5   127000.1   139442.8        0.0        0.0        0.0        0.0    10003.9    95765.0   114947.9   135076.8       0.00      91.88      91.88      91.88
 CCl4             1980.0   128660.0        0.0   116550.9      93.34     6429.6   116054.9   128660.1   141265.4        0.0        0.0        0.0        0.0    10158.0    96938.0   116418.8   136858.6       0.00      93.34      93.34      93.34
 CCl4             1981.0   118416.4        0.0   106137.5      94.80     5917.7   106814.9   118416.4   130018.2        0.0        0.0        0.0        0.0    10175.2    86472.1   106008.0   126455.2       0.00      94.80      94.80      94.80
 CCl4             1982.0   126760.8        0.0   114339.0      95.81     6334.7   114341.8   126760.9   139180.2        0.0        0.0        0.0        0.0    10364.6    94324.3   114206.9   135050.2       0.00      95.81      95.81      95.81
 CCl4             1983.0   123817.2        0.0   111235.1      97.11     6187.6   111686.6   123817.3   135948.1        0.0        0.0        0.0        0.0    10451.4    91036.8   111105.9   132103.3       0.00      97.11      97.11      97.11
 CCl4             1984.0   131407.3        0.0   118667.9      98.25     6566.9   118533.1   131407.4   144281.9        0.0        0.0        0.0        0.0    10644.4    98113.4   118530.3   139940.8       0.00      98.25      98.25      98.25
 CCl4             1985.0   126345.3        0.0   113437.9      99.63     6313.9   113967.0   126345.4   138724.0        0.0        0.0        0.0        0.0    10714.9    92732.6   113304.3   134832.5       0.00      99.63      99.63      99.63
 CCl4             1986.0   143976.0        0.0   130894.0     100.77     7195.0   129870.3   143976.0   158082.0        0.0        0.0        0.0        0.0    11028.9   109613.6   130746.7   152947.7       0.00     100.77     100.77     100.77
 CCl4             1987.0   125874.8        0.0   112596.6     102.55     6290.4   113542.6   125874.9   138207.3        0.0        0.0        0.0        0.0    10982.0    91379.4   112460.0   134513.2       0.00     102.55     102.55     102.55
 CCl4             1988.0   134564.3        0.0   121142.9     103.56     6724.6   121380.7   134564.3   147748.2        0.0        0.0        0.0        0.0    11173.8    99561.1   121006.1   143462.5       0.00     103.56     103.56     103.56
 CCl4             1989.0   145421.0        0.0   131815.0     104.86     7267.2   131173.8   145421.1   159668.6        0.0        0.0        0.0        0.0    11423.0   109764.7   131666.4   154647.3       0.00     104.86     104.86     104.86
 CCl4             1990.0    97589.6        0.0    83848.6     106.54     4876.9    88028.6    97589.7   107150.9        0.0        0.0        0.0        0.0    11084.7    62352.9    83752.9   105885.0       0.00     106.54     106.54     106.54
 CCl4             1991.0    77763.0        0.0    64084.7     106.30     3886.1    70144.4    77763.0    85381.8        0.0        0.0        0.0        0.0    10906.2    42858.3    63996.8    85697.0       0.00     106.30     106.30     106.30
 CCl4             1992.0    86270.0        0.0    72705.0     105.31     4311.2    77818.0    86270.1    94722.3        0.0        0.0        0.0        0.0    10872.7    51575.2    72615.2    94290.3       0.00     105.31     105.31     105.31
 CCl4             1993.0    83211.4        0.0    69731.6     104.68     4158.4    75059.0    83211.4    91364.0        0.0        0.0        0.0        0.0    10788.0    48757.0    69641.0    91142.9       0.00     104.68     104.68     104.68
 CCl4             1994.0    81744.4        0.0    68359.3     103.95     4085.0    73735.7    81744.4    89753.2        0.0        0.0        0.0        0.0    10706.6    47539.5    68269.1    89601.0       0.00     103.95     103.95     103.95
 CCl4             1995.0    83447.4        0.0    70155.9     103.20     4170.1    75271.9    83447.5    91623.2        0.0        0.0        0.0        0.0    10646.4    49458.4    70064.8    91283.8       0.00     103.20     103.20     103.20
 CCl4             1996.0    68936.8        0.0    55753.1     102.54     3445.0    62182.9    68936.8    75690.8        0.0        0.0        0.0        0.0    10478.3    35345.6    55677.5    76500.4       0.00     102.54     102.54     102.54
 CCl4             1997.0    77141.6        0.0    64097.1     101.34     3855.0    69583.9    77141.6    84699.5        0.0        0.0        0.0        0.0    10418.7    43831.0    64008.8    84753.0       0.00     101.34     101.34     101.34
 CCl4             1998.0    79153.8        0.0    66212.0     100.51     3955.6    71399.0    79153.9    86908.9        0.0        0.0        0.0        0.0    10352.6    46081.2    66124.6    86751.6       0.00     100.51     100.51     100.51
 CCl4             1999.0    66312.3        0.0    53484.2      99.78     3313.9    59815.6    66312.3    72809.2        0.0        0.0        0.0        0.0    10191.6    33630.7    53413.2    73665.7       0.00      99.78      99.78      99.78
 CCl4             2000.0    73527.6        0.0    60840.2      98.59     3674.4    66324.0    73527.7    80731.5        0.0        0.0        0.0        0.0    10192.1    41019.0    60754.0    81037.8       0.00      98.59      98.59      98.59
 CCl4             2001.0    66092.2        0.0    53527.3      97.72     3302.9    59617.0    66092.3    72567.6        0.0        0.0        0.0        0.0    10057.4    33973.8    53471.5    73446.4       0.04      97.63      97.72      97.80
 CCl4             2002.0    69242.2        0.0    56816.1      96.59     3460.3    62458.4    69242.2    76026.2        0.0        0.0        0.0        0.0     9970.7    37434.5    56734.6    76550.5       0.06      96.48      96.59      96.71
 CCl4             2003.0    70144.0        0.0    57839.2      95.63     3505.3    63271.9    70144.1    77016.4        0.0        0.0        0.0        0.0     9877.4    38606.7    57766.3    77441.7       0.07      95.50      95.63      95.77
 CCl4             2004.0    66548.0        0.0    54361.9      94.74     3325.6    60028.1    66548.0    73068.0        0.0        0.0        0.0        0.0     9773.0    35341.7    54289.6    73729.9       0.08      94.59      94.74      94.89
 CCl4             2005.0    64972.2        0.0    52915.9      93.74     3246.9    58606.7    64972.2    71337.8        0.0        0.0        0.0        0.0     9661.1    34130.5    52837.9    72067.2       0.08      93.59      93.74      93.90
 CCl4             2006.0    62037.1        0.0    50115.6      92.73     3100.2    55959.2    62037.1    68115.1        0.0        0.0        0.0        0.0     9546.2    31536.1    50035.3    69010.5       0.09      92.56      92.73      92.89
 CCl4             2007.0    58707.1        0.0    46930.3      91.63     2933.8    52955.4    58707.1    64458.9        0.0        0.0        0.0        0.0     9412.4    28595.5    46869.7    65554.2       0.09      91.46      91.63      91.81
 CCl4             2008.0    51724.1        0.0    40109.8      90.45     2584.8    46656.6    51724.1    56791.8        0.0        0.0        0.0        0.0     9262.4    22043.9    40057.0    58410.9       0.09      90.27      90.45      90.63
 CCl4             2009.0    48027.3        0.0    48027.3      89.04     2515.3    43089.7    48027.9    52955.6        0.0        0.0        0.0        0.0     2515.3    43089.7    48027.9    52955.6       0.09      88.86      89.04      89.22
 CCl4             2010.0    44605.2        0.0    44605.2      87.99     2615.6    39396.9    44637.2    49652.9        0.0        0.0        0.0        0.0     2615.6    39396.9    44637.2    49652.9       0.35      87.29      87.99      88.67
 CCl4             2011.0    41436.4        0.0    41436.4      86.84     2797.1    35725.6    41510.0    46703.9        0.0        0.0        0.0        0.0     2797.1    35725.6    41510.0    46703.9       0.65      85.53      86.85      88.09
 CCl4             2012.0    38501.4        0.0    38501.4      85.60     3000.8    32223.8    38630.9    44009.8        0.0        0.0        0.0        0.0     3000.8    32223.8    38630.9    44009.8       0.92      83.75      85.62      87.37
 CCl4             2013.0    35782.1        0.0    35782.1      84.30     3194.8    28981.3    35952.4    41547.3        0.0        0.0        0.0        0.0     3194.8    28981.3    35952.4    41547.3       1.17      81.95      84.32      86.51
 CCl4             2014.0    33262.0        0.0    33262.0      82.93     3364.4    26018.6    33467.9    39265.9        0.0        0.0        0.0        0.0     3364.4    26018.6    33467.9    39265.9       1.39      80.13      82.96      85.55
 CCl4             2015.0    30926.0        0.0    30926.0      81.51     3503.8    23345.9    31153.1    37147.7        0.0        0.0        0.0        0.0     3503.8    23345.9    31153.1    37147.7       1.59      78.30      81.55      84.49
 CCl4             2016.0    28759.9        0.0    28759.9      80.04     3612.1    20929.5    28999.0    35165.0        0.0        0.0        0.0        0.0     3612.1    20929.5    28999.0    35165.0       1.77      76.47      80.09      83.35
 CCl4             2017.0    26751.0        0.0    26751.0      78.54     3690.5    18759.0    26993.5    33312.0        0.0        0.0        0.0        0.0     3690.5    18759.0    26993.5    33312.0       1.93      74.64      78.60      82.14
 CCl4             2018.0    24887.4        0.0    24887.4      77.02     3741.5    16803.5    25129.2    31561.8        0.0        0.0        0.0        0.0     3741.5    16803.5    25129.2    31561.8       2.07      72.81      77.07      80.88
 CCl4             2019.0    23158.2        0.0    23158.2      75.47     3767.7    15048.0    23391.1    29912.0        0.0        0.0        0.0        0.0     3767.7    15048.0    23391.1    29912.0       2.20      71.00      75.53      79.57
 CCl4             2020.0    21553.3        0.0    21553.3      73.90     3772.1    13479.2    21774.8    28358.3        0.0        0.0        0.0        0.0     3772.1    13479.2    21774.8    28358.3       2.32      69.19      73.96      78.23
 CCl4             2021.0    20063.4        0.0    20063.4      72.32     3757.5    12066.1    20267.4    26887.5        0.0        0.0        0.0        0.0     3757.5    12066.1    20267.4    26887.5       2.43      67.40      72.39      76.86
 CCl4             2022.0    18680.0        0.0    18680.0      70.74     3726.5    10799.9    18863.5    25493.7        0.0        0.0        0.0        0.0     3726.5    10799.9    18863.5    25493.7       2.53      65.62      70.81      75.46
 CCl4             2023.0    17395.2        0.0    17395.2      69.16     3681.5     9670.9    17560.4    24174.1        0.0        0.0        0.0        0.0     3681.5     9670.9    17560.4    24174.1       2.62      63.87      69.22      74.05
 CCl4             2024.0    16201.6        0.0    16201.6      67.58     3624.6     8657.6    16344.7    22930.2        0.0        0.0        0.0        0.0     3624.6     8657.6    16344.7    22930.2       2.70      62.13      67.64      72.63
 CCl4             2025.0    15092.7        0.0    15092.7      66.00     3557.9     7747.7    15212.6    21752.6        0.0        0.0        0.0        0.0     3557.9     7747.7    15212.6    21752.6       2.77      60.42      66.06      71.21
 CCl4             2026.0    14062.1        0.0    14062.1      64.43     3483.0     6935.8    14160.7    20642.2        0.0        0.0        0.0        0.0     3483.0     6935.8    14160.7    20642.2       2.83      58.73      64.49      69.78
 CCl4             2027.0    13104.2        0.0    13104.2      62.88     3401.5     6207.5    13181.3    19583.3        0.0        0.0        0.0        0.0     3401.5     6207.5    13181.3    19583.3       2.89      57.07      62.93      68.34
 CCl4             2028.0    12213.6        0.0    12213.6      61.34     3314.8     5554.7    12269.2    18578.9        0.0        0.0        0.0        0.0     3314.8     5554.7    12269.2    18578.9       2.95      55.44      61.38      66.92
 CCl4             2029.0    11385.5        0.0    11385.5      59.81     3224.1     4969.0    11419.9    17631.7        0.0        0.0        0.0        0.0     3224.1     4969.0    11419.9    17631.7       2.99      53.84      59.85      65.50
 CCl4             2030.0    10615.2        0.0    10615.2      58.30     3130.3     4449.6    10629.8    16730.2        0.0        0.0        0.0        0.0     3130.3     4449.6    10629.8    16730.2       3.03      52.26      58.34      64.09
 CCl4             2031.0     9898.7        0.0     9898.7      56.81     3034.5     3982.0     9894.1    15875.7        0.0        0.0        0.0        0.0     3034.5     3982.0     9894.1    15875.7       3.07      50.72      56.84      62.69
 CCl4             2032.0     9232.0        0.0     9232.0      55.35     2937.4     3563.4     9209.2    15068.7        0.0        0.0        0.0        0.0     2937.4     3563.4     9209.2    15068.7       3.10      49.20      55.37      61.31
 CCl4             2033.0     8611.7        0.0     8611.7      53.90     2839.6     3188.2     8571.4    14300.8        0.0        0.0        0.0        0.0     2839.6     3188.2     8571.4    14300.8       3.13      47.72      53.92      59.94
 CCl4             2034.0     8034.2        0.0     8034.2      52.48     2741.8     2852.8     7977.0    13573.6        0.0        0.0        0.0        0.0     2741.8     2852.8     7977.0    13573.6       3.16      46.26      52.49      58.59
 CCl4             2035.0     7496.7        0.0     7496.7      51.08     2644.4     2554.2     7425.0    12884.4        0.0        0.0        0.0        0.0     2644.4     2554.2     7425.0    12884.4       3.18      44.85      51.09      57.25
 CCl4             2036.0     6996.2        0.0     6996.2      49.71     2548.0     2285.2     6911.1    12230.1        0.0        0.0        0.0        0.0     2548.0     2285.2     6911.1    12230.1       3.20      43.46      49.71      55.94
 CCl4             2037.0     6530.1        0.0     6530.1      48.37     2452.7     2043.7     6433.2    11608.9        0.0        0.0        0.0        0.0     2452.7     2043.7     6433.2    11608.9       3.21      42.11      48.35      54.65
 CCl4             2038.0     6095.9        0.0     6095.9      47.05     2359.0     1829.1     5988.4    11017.5        0.0        0.0        0.0        0.0     2359.0     1829.1     5988.4    11017.5       3.22      40.79      47.02      53.38
 CCl4             2039.0     5691.5        0.0     5691.5      45.75     2267.1     1637.3     5573.6    10457.2        0.0        0.0        0.0        0.0     2267.1     1637.3     5573.6    10457.2       3.23      39.50      45.72      52.12
 CCl4             2040.0     5314.7        0.0     5314.7      44.48     2177.2     1465.4     5188.1     9925.7        0.0        0.0        0.0        0.0     2177.2     1465.4     5188.1     9925.7       3.24      38.24      44.45      50.90
 CCl4             2041.0     4963.5        0.0     4963.5      43.24     2089.5     1311.1     4828.7     9423.2        0.0        0.0        0.0        0.0     2089.5     1311.1     4828.7     9423.2       3.24      37.02      43.20      49.69
 CCl4             2042.0     4636.2        0.0     4636.2      42.03     2004.0     1173.3     4494.7     8943.6        0.0        0.0        0.0        0.0     2004.0     1173.3     4494.7     8943.6       3.25      35.82      41.97      48.50
 CCl4             2043.0     4331.1        0.0     4331.1      40.85     1920.9     1050.2     4183.7     8489.1        0.0        0.0        0.0        0.0     1920.9     1050.2     4183.7     8489.1       3.25      34.66      40.78      47.33
 CCl4             2044.0     4046.7        0.0     4046.7      39.69     1840.2      939.9     3893.9     8057.8        0.0        0.0        0.0        0.0     1840.2      939.9     3893.9     8057.8       3.24      33.53      39.61      46.19
 CCl4             2045.0     3781.4        0.0     3781.4      38.55     1762.0      841.1     3624.6     7648.1        0.0        0.0        0.0        0.0     1762.0      841.1     3624.6     7648.1       3.24      32.43      38.47      45.07
 CCl4             2046.0     3534.1        0.0     3534.1      37.45     1686.4      752.4     3373.6     7261.4        0.0        0.0        0.0        0.0     1686.4      752.4     3373.6     7261.4       3.23      31.36      37.36      43.98
 CCl4             2047.0     3303.3        0.0     3303.3      36.37     1613.3      673.1     3139.8     6892.5        0.0        0.0        0.0        0.0     1613.3      673.1     3139.8     6892.5       3.22      30.32      36.27      42.91
 CCl4             2048.0     3088.0        0.0     3088.0      35.32     1542.7      602.2     2922.7     6543.0        0.0        0.0        0.0        0.0     1542.7      602.2     2922.7     6543.0       3.21      29.31      35.21      41.86
 CCl4             2049.0     2887.2        0.0     2887.2      34.29     1474.7      538.9     2720.5     6211.6        0.0        0.0        0.0        0.0     1474.7      538.9     2720.5     6211.6       3.20      28.33      34.18      40.84
 CCl4             2050.0     2699.8        0.0     2699.8      33.29     1409.2      482.1     2532.3     5897.6        0.0        0.0        0.0        0.0     1409.2      482.1     2532.3     5897.6       3.19      27.38      33.17      39.84
 CCl4             2051.0        0.0        0.0        0.0      32.32        0.0        0.0        0.0        0.0        0.0        0.0        0.0        0.0        0.0        0.0        0.0        0.0       3.17      26.45      32.18      38.85
 CCl4             2052.0        0.0        0.0        0.0      31.27        0.0        0.0        0.0        0.0        0.0        0.0        0.0        0.0        0.0        0.0        0.0        0.0       3.19      25.40      31.13      37.86
 CCl4             2053.0        0.0        0.0        0.0      30.25        0.0        0.0        0.0        0.0        0.0        0.0        0.0        0.0        0.0        0.0        0.0        0.0       3.20      24.39      30.11      36.89
 CCl4             2054.0        0.0        0.0        0.0      29.27        0.0        0.0        0.0        0.0        0.0        0.0        0.0        0.0        0.0        0.0        0.0        0.0       3.20      23.42      29.12      35.95
 CCl4             2055.0        0.0        0.0        0.0      28.33        0.0        0.0        0.0        0.0        0.0        0.0        0.0        0.0        0.0        0.0        0.0        0.0       3.21      22.49      28.16      35.03
 CCl4             2056.0        0.0        0.0        0.0      27.41        0.0        0.0        0.0        0.0        0.0        0.0        0.0        0.0        0.0        0.0        0.0        0.0       3.21      21.60      27.24      34.14
 CCl4             2057.0        0.0        0.0        0.0      26.52        0.0        0.0        0.0        0.0        0.0        0.0        0.0        0.0        0.0        0.0        0.0        0.0       3.20      20.73      26.35      33.26
 CCl4             2058.0        0.0        0.0        0.0      25.67        0.0        0.0        0.0        0.0        0.0        0.0        0.0        0.0        0.0        0.0        0.0        0.0       3.20      19.90      25.48      32.42
 CCl4             2059.0        0.0        0.0        0.0      24.84        0.0        0.0        0.0        0.0        0.0        0.0        0.0        0.0        0.0        0.0        0.0        0.0       3.19      19.11      24.65      31.59
 CCl4             2060.0        0.0        0.0        0.0      24.03        0.0        0.0        0.0        0.0        0.0        0.0        0.0        0.0        0.0        0.0        0.0        0.0       3.18      18.34      23.84      30.78
 CCl4             2061.0        0.0        0.0        0.0      23.26        0.0        0.0        0.0        0.0        0.0        0.0        0.0        0.0        0.0        0.0        0.0        0.0       3.17      17.61      23.06      30.00
 CCl4             2062.0        0.0        0.0        0.0      22.51        0.0        0.0        0.0        0.0        0.0        0.0        0.0        0.0        0.0        0.0        0.0        0.0       3.15      16.90      22.30      29.24
 CCl4             2063.0        0.0        0.0        0.0      21.78        0.0        0.0        0.0        0.0        0.0        0.0        0.0        0.0        0.0        0.0        0.0        0.0       3.14      16.23      21.57      28.50
 CCl4             2064.0        0.0        0.0        0.0      21.08        0.0        0.0        0.0        0.0        0.0        0.0        0.0        0.0        0.0        0.0        0.0        0.0       3.12      15.58      20.87      27.78
 CCl4             2065.0        0.0        0.0        0.0      20.40        0.0        0.0        0.0        0.0        0.0        0.0        0.0        0.0        0.0        0.0        0.0        0.0       3.10      14.95      20.18      27.07
 CCl4             2066.0        0.0        0.0        0.0      19.74        0.0        0.0        0.0        0.0        0.0        0.0        0.0        0.0        0.0        0.0        0.0        0.0       3.08      14.35      19.52      26.39
 CCl4             2067.0        0.0        0.0        0.0      19.11        0.0        0.0        0.0        0.0        0.0        0.0        0.0        0.0        0.0        0.0        0.0        0.0       3.05      13.78      18.88      25.72
 CCl4             2068.0        0.0        0.0        0.0      18.49        0.0        0.0        0.0        0.0        0.0        0.0        0.0        0.0        0.0        0.0        0.0        0.0       3.03      13.22      18.26      25.06
 CCl4             2069.0        0.0        0.0        0.0      17.90        0.0        0.0        0.0        0.0        0.0        0.0        0.0        0.0        0.0        0.0        0.0        0.0       3.00      12.69      17.66      24.43
 CCl4             2070.0        0.0        0.0        0.0      17.32        0.0        0.0        0.0        0.0        0.0        0.0        0.0        0.0        0.0        0.0        0.0        0.0       2.97      12.18      17.08      23.81
 CCl4             2071.0        0.0        0.0        0.0      16.77        0.0        0.0        0.0        0.0        0.0        0.0        0.0        0.0        0.0        0.0        0.0        0.0       2.95      11.69      16.52      23.21
 CCl4             2072.0        0.0        0.0        0.0      16.23        0.0        0.0        0.0        0.0        0.0        0.0        0.0        0.0        0.0        0.0        0.0        0.0       2.92      11.22      15.98      22.62
 CCl4             2073.0        0.0        0.0        0.0      15.71        0.0        0.0        0.0        0.0        0.0        0.0        0.0        0.0        0.0        0.0        0.0        0.0       2.89      10.77      15.46      22.05
 CCl4             2074.0        0.0        0.0        0.0      15.20        0.0        0.0        0.0        0.0        0.0        0.0        0.0        0.0        0.0        0.0        0.0        0.0       2.85      10.34      14.95      21.49
 CCl4             2075.0        0.0        0.0        0.0      14.71        0.0        0.0        0.0        0.0        0.0        0.0        0.0        0.0        0.0        0.0        0.0        0.0       2.82       9.92      14.46      20.94
 CCl4             2076.0        0.0        0.0        0.0      14.24        0.0        0.0        0.0        0.0        0.0        0.0        0.0        0.0        0.0        0.0        0.0        0.0       2.79       9.52      13.99      20.41
 CCl4             2077.0        0.0        0.0        0.0      13.79        0.0        0.0        0.0        0.0        0.0        0.0        0.0        0.0        0.0        0.0        0.0        0.0       2.75       9.14      13.53      19.90
 CCl4             2078.0        0.0        0.0        0.0      13.35        0.0        0.0        0.0        0.0        0.0        0.0        0.0        0.0        0.0        0.0        0.0        0.0       2.72       8.77      13.09      19.39
 CCl4             2079.0        0.0        0.0        0.0      12.92        0.0        0.0        0.0        0.0        0.0        0.0        0.0        0.0        0.0        0.0        0.0        0.0       2.69       8.42      12.66      18.90
 CCl4             2080.0        0.0        0.0        0.0      12.50        0.0        0.0        0.0        0.0        0.0        0.0        0.0        0.0        0.0        0.0        0.0        0.0       2.65       8.08      12.24      18.43
 CCl4             2081.0        0.0        0.0        0.0      12.10        0.0        0.0        0.0        0.0        0.0        0.0        0.0        0.0        0.0        0.0        0.0        0.0       2.62       7.76      11.84      17.96
 CCl4             2082.0        0.0        0.0        0.0      11.72        0.0        0.0        0.0        0.0        0.0        0.0        0.0        0.0        0.0        0.0        0.0        0.0       2.58       7.44      11.45      17.51
 CCl4             2083.0        0.0        0.0        0.0      11.34        0.0        0.0        0.0        0.0        0.0        0.0        0.0        0.0        0.0        0.0        0.0        0.0       2.54       7.14      11.08      17.07
 CCl4             2084.0        0.0        0.0        0.0      10.98        0.0        0.0        0.0        0.0        0.0        0.0        0.0        0.0        0.0        0.0        0.0        0.0       2.51       6.86      10.71      16.64
 CCl4             2085.0        0.0        0.0        0.0      10.63        0.0        0.0        0.0        0.0        0.0        0.0        0.0        0.0        0.0        0.0        0.0        0.0       2.47       6.58      10.36      16.22
 CCl4             2086.0        0.0        0.0        0.0      10.29        0.0        0.0        0.0        0.0        0.0        0.0        0.0        0.0        0.0        0.0        0.0        0.0       2.43       6.32      10.02      15.81
 CCl4             2087.0        0.0        0.0        0.0       9.96        0.0        0.0        0.0        0.0        0.0        0.0        0.0        0.0        0.0        0.0        0.0        0.0       2.40       6.06       9.69      15.41
 CCl4             2088.0        0.0        0.0        0.0       9.65        0.0        0.0        0.0        0.0        0.0        0.0        0.0        0.0        0.0        0.0        0.0        0.0       2.36       5.82       9.37      15.02
 CCl4             2089.0        0.0        0.0        0.0       9.34        0.0        0.0        0.0        0.0        0.0        0.0        0.0        0.0        0.0        0.0        0.0        0.0       2.32       5.59       9.07      14.64
 CCl4             2090.0        0.0        0.0        0.0       9.04        0.0        0.0        0.0        0.0        0.0        0.0        0.0        0.0        0.0        0.0        0.0        0.0       2.29       5.36       8.77      14.27
 CCl4             2091.0        0.0        0.0        0.0       8.75        0.0        0.0        0.0        0.0        0.0        0.0        0.0        0.0        0.0        0.0        0.0        0.0       2.25       5.14       8.48      13.91
 CCl4             2092.0        0.0        0.0        0.0       8.48        0.0        0.0        0.0        0.0        0.0        0.0        0.0        0.0        0.0        0.0        0.0        0.0       2.21       4.94       8.20      13.56
 CCl4             2093.0        0.0        0.0        0.0       8.21        0.0        0.0        0.0        0.0        0.0        0.0        0.0        0.0        0.0        0.0        0.0        0.0       2.18       4.74       7.93      13.21
 CCl4             2094.0        0.0        0.0        0.0       7.95        0.0        0.0        0.0        0.0        0.0        0.0        0.0        0.0        0.0        0.0        0.0        0.0       2.14       4.55       7.67      12.88
 CCl4             2095.0        0.0        0.0        0.0       7.69        0.0        0.0        0.0        0.0        0.0        0.0        0.0        0.0        0.0        0.0        0.0        0.0       2.11       4.37       7.42      12.55
 CCl4             2096.0        0.0        0.0        0.0       7.45        0.0        0.0        0.0        0.0        0.0        0.0        0.0        0.0        0.0        0.0        0.0        0.0       2.07       4.19       7.18      12.24
 CCl4             2097.0        0.0        0.0        0.0       7.21        0.0        0.0        0.0        0.0        0.0        0.0        0.0        0.0        0.0        0.0        0.0        0.0       2.04       4.02       6.94      11.93
 CCl4             2098.0        0.0        0.0        0.0       6.98        0.0        0.0        0.0        0.0        0.0        0.0        0.0        0.0        0.0        0.0        0.0        0.0       2.00       3.86       6.72      11.63
 CCl4             2099.0        0.0        0.0        0.0       6.76        0.0        0.0        0.0        0.0        0.0        0.0        0.0        0.0        0.0        0.0        0.0        0.0       1.96       3.70       6.50      11.33
 CCl4             2100.0        0.0        0.0        0.0       6.55        0.0        0.0        0.0        0.0        0.0        0.0        0.0        0.0        0.0        0.0        0.0        0.0       1.93       3.56       6.28      11.05
 CCl4             2101.0        0.0        0.0        0.0       6.34        0.0        0.0        0.0        0.0        0.0        0.0        0.0        0.0        0.0        0.0        0.0        0.0       1.90       3.41       6.08      10.77
 CCl4             2102.0        0.0        0.0        0.0       6.14        0.0        0.0        0.0        0.0        0.0        0.0        0.0        0.0        0.0        0.0        0.0        0.0       1.86       3.27       5.88      10.50
 CCl4             2103.0        0.0        0.0        0.0       5.95        0.0        0.0        0.0        0.0        0.0        0.0        0.0        0.0        0.0        0.0        0.0        0.0       1.83       3.14       5.69      10.23
 CCl4             2104.0        0.0        0.0        0.0       5.76        0.0        0.0        0.0        0.0        0.0        0.0        0.0        0.0        0.0        0.0        0.0        0.0       1.79       3.02       5.50       9.98
 CCl4             2105.0        0.0        0.0        0.0       5.58        0.0        0.0        0.0        0.0        0.0        0.0        0.0        0.0        0.0        0.0        0.0        0.0       1.76       2.90       5.32       9.72
 CCl4             2106.0        0.0        0.0        0.0       5.40        0.0        0.0        0.0        0.0        0.0        0.0        0.0        0.0        0.0        0.0        0.0        0.0       1.73       2.78       5.14       9.48
 CCl4             2107.0        0.0        0.0        0.0       5.23        0.0        0.0        0.0        0.0        0.0        0.0        0.0        0.0        0.0        0.0        0.0        0.0       1.70       2.67       4.98       9.24
 CCl4             2108.0        0.0        0.0        0.0       5.06        0.0        0.0        0.0        0.0        0.0        0.0        0.0        0.0        0.0        0.0        0.0        0.0       1.67       2.56       4.81       9.01
 CCl4             2109.0        0.0        0.0        0.0       4.90        0.0        0.0        0.0        0.0        0.0        0.0        0.0        0.0        0.0        0.0        0.0        0.0       1.63       2.46       4.66       8.78
 CCl4             2110.0        0.0        0.0        0.0       4.75        0.0        0.0        0.0        0.0        0.0        0.0        0.0        0.0        0.0        0.0        0.0        0.0       1.60       2.36       4.50       8.56
 CCl4             2111.0        0.0        0.0        0.0       4.60        0.0        0.0        0.0        0.0        0.0        0.0        0.0        0.0        0.0        0.0        0.0        0.0       1.57       2.26       4.35       8.34
 CCl4             2112.0        0.0        0.0        0.0       4.46        0.0        0.0        0.0        0.0        0.0        0.0        0.0        0.0        0.0        0.0        0.0        0.0       1.54       2.17       4.21       8.13
 CCl4             2113.0        0.0        0.0        0.0       4.32        0.0        0.0        0.0        0.0        0.0        0.0        0.0        0.0        0.0        0.0        0.0        0.0       1.51       2.08       4.07       7.93
 CCl4             2114.0        0.0        0.0        0.0       4.18        0.0        0.0        0.0        0.0        0.0        0.0        0.0        0.0        0.0        0.0        0.0        0.0       1.48       2.00       3.94       7.73
 CCl4             2115.0        0.0        0.0        0.0       4.05        0.0        0.0        0.0        0.0        0.0        0.0        0.0        0.0        0.0        0.0        0.0        0.0       1.45       1.92       3.81       7.53
 CCl4             2116.0        0.0        0.0        0.0       3.92        0.0        0.0        0.0        0.0        0.0        0.0        0.0        0.0        0.0        0.0        0.0        0.0       1.42       1.84       3.69       7.34
 CCl4             2117.0        0.0        0.0        0.0       3.80        0.0        0.0        0.0        0.0        0.0        0.0        0.0        0.0        0.0        0.0        0.0        0.0       1.40       1.77       3.57       7.16
 CCl4             2118.0        0.0        0.0        0.0       3.68        0.0        0.0        0.0        0.0        0.0        0.0        0.0        0.0        0.0        0.0        0.0        0.0       1.37       1.70       3.45       6.98
 CCl4             2119.0        0.0        0.0        0.0       3.56        0.0        0.0        0.0        0.0        0.0        0.0        0.0        0.0        0.0        0.0        0.0        0.0       1.34       1.63       3.34       6.80
 CCl4             2120.0        0.0        0.0        0.0       3.45        0.0        0.0        0.0        0.0        0.0        0.0        0.0        0.0        0.0        0.0        0.0        0.0       1.31       1.56       3.23       6.63
 
 Species            Year  Prod_mean  Bank_mean  Emis_mean   Mix_mean  Prod_stdv  Prod_2.5p   Prod_50p Prod_97.5p  Bank_stdv  Bank_2.5p   Bank_50p Bank_97.5p  Emis_stdv  Emis_2.5p   Emis_50p Emis_97.5p   Mix_stdv   Mix_2.5p    Mix_50p  Mix_97.5p
 CH3CCl3          1950.0        0.0        0.0        0.0       0.00        0.0        0.0        0.0        0.0        0.0        0.0        0.0        0.0        0.0        0.0        0.0        0.0       0.00       0.00       0.00       0.00
 CH3CCl3          1951.0        0.0        0.0        0.0       0.00        0.0        0.0        0.0        0.0        0.0        0.0        0.0        0.0        0.0        0.0        0.0        0.0       0.00       0.00       0.00       0.00
 CH3CCl3          1952.0        0.0        0.0        0.0       0.00        0.0        0.0        0.0        0.0        0.0        0.0        0.0        0.0        0.0        0.0        0.0        0.0       0.00       0.00       0.00       0.00
 CH3CCl3          1953.0        0.0        0.0        0.0       0.00        0.0        0.0        0.0        0.0        0.0        0.0        0.0        0.0        0.0        0.0        0.0        0.0       0.00       0.00       0.00       0.00
 CH3CCl3          1954.0     1214.6        0.0     1220.7       0.00       60.7     1095.6     1214.6     1333.6        0.0        0.0        0.0        0.0       36.9     1151.5     1219.5     1296.1       0.00       0.00       0.00       0.00
 CH3CCl3          1955.0     3513.3        0.0     3538.7       0.05      175.6     3169.1     3513.3     3857.5        0.0        0.0        0.0        0.0      107.7     3336.4     3535.5     3759.3       0.00       0.05       0.05       0.05
 CH3CCl3          1956.0     6226.3        0.0     6287.8       0.19      311.1     5616.3     6226.3     6836.3        0.0        0.0        0.0        0.0      193.5     5924.0     6282.0     6683.6       0.00       0.19       0.19       0.19
 CH3CCl3          1957.0     9473.3        0.0     9587.9       0.41      473.4     8545.2     9473.3    10401.4        0.0        0.0        0.0        0.0      298.8     9026.1     9579.1    10199.1       0.00       0.41       0.41       0.41
 CH3CCl3          1958.0    10776.8        0.0    10950.2       0.73      538.6     9721.0    10776.8    11832.6        0.0        0.0        0.0        0.0      351.1    10289.3    10940.0    11669.2       0.00       0.73       0.73       0.73
 CH3CCl3          1959.0    14723.2        0.0    14967.8       1.04      735.8    13280.8    14723.2    16165.7        0.0        0.0        0.0        0.0      481.9    14060.4    14953.6    15955.2       0.00       1.04       1.04       1.04
 CH3CCl3          1960.0    18355.6        0.0    18687.5       1.46      917.3    16557.3    18355.6    20154.0        0.0        0.0        0.0        0.0      609.1    17540.4    18669.7    19934.9       0.00       1.46       1.46       1.46
 CH3CCl3          1961.0    20084.8        0.0    20507.0       1.95     1003.7    18117.1    20084.8    22052.6        0.0        0.0        0.0        0.0      686.4    19212.4    20488.1    21913.3       0.00       1.95       1.95       1.95
 CH3CCl3          1962.0    28231.4        0.0    28772.3       2.43     1410.8    25465.6    28231.5    30997.4        0.0        0.0        0.0        0.0      946.7    26989.8    28744.3    30712.2       0.00       2.43       2.43       2.43
 CH3CCl3          1963.0    31472.8        0.0    32149.8       3.15     1572.8    28389.3    31472.8    34556.3        0.0        0.0        0.0        0.0     1081.1    30109.7    32119.8    34364.9       0.00       3.15       3.15       3.15
 CH3CCl3          1964.0    36211.7        0.0    37032.2       3.88     1809.6    32664.0    36211.7    39759.5        0.0        0.0        0.0        0.0     1259.4    34654.1    36997.5    39612.2       0.00       3.88       3.88       3.88
 CH3CCl3          1965.0    48115.9        0.0    49126.3       4.67     2404.5    43401.9    48115.9    52829.9        0.0        0.0        0.0        0.0     1644.0    46025.3    49080.9    52494.9       0.00       4.67       4.67       4.67
 CH3CCl3          1966.0    69595.0        0.0    70899.9       5.81     3477.9    62776.6    69595.0    76413.4        0.0        0.0        0.0        0.0     2324.3    66522.7    70830.6    75660.0       0.00       5.81       5.81       5.81
 CH3CCl3          1967.0    94175.4        0.0    95902.8       7.63     4706.3    84948.9    94175.5   103402.0        0.0        0.0        0.0        0.0     3132.7    90004.6    95811.1   102318.6       0.00       7.63       7.63       7.63
 CH3CCl3          1968.0   114813.5        0.0   117056.9      10.14     5737.6   103565.0   114813.5   126062.1        0.0        0.0        0.0        0.0     3864.6   109776.9   116945.0   124977.6       0.00      10.14      10.14      10.14
 CH3CCl3          1969.0   134929.2        0.0   137751.9      13.04     6742.9   121709.9   134929.2   148148.5        0.0        0.0        0.0        0.0     4606.4   129063.8   137624.3   147191.6       0.00      13.04      13.04      13.04
 CH3CCl3          1970.0   141383.7        0.0   144768.8      16.25     7065.4   127532.1   141383.8   155235.4        0.0        0.0        0.0        0.0     4986.8   135344.6   144630.9   154972.8       0.00      16.25      16.25      16.25
 CH3CCl3          1971.0   170202.2        0.0   174207.7      19.14     8505.6   153527.2   170202.3   186877.4        0.0        0.0        0.0        0.0     5976.2   162911.4   174044.4   186442.6       0.00      19.14      19.14      19.14
 CH3CCl3          1972.0   214254.5        0.0   219066.1      22.70    10707.0   193263.7   214254.6   235245.6        0.0        0.0        0.0        0.0     7434.9   205027.8   218860.2   234307.8       0.00      22.70      22.70      22.70
 CH3CCl3          1973.0   266316.4        0.0   272167.7      27.43    13308.7   240225.0   266316.5   292408.1        0.0        0.0        0.0        0.0     9193.2   254812.8   271910.4   291018.4       0.00      27.43      27.43      27.43
 CH3CCl3          1974.0   305613.1        0.0   312654.5      33.45    15272.5   275671.7   305613.2   335554.8        0.0        0.0        0.0        0.0    10672.6   292497.0   312363.2   334502.3       0.00      33.45      33.45      33.45
 CH3CCl3          1975.0   309117.3        0.0   317259.6      40.00    15447.6   278832.6   309117.4   339402.3        0.0        0.0        0.0        0.0    11204.5   296063.1   316951.3   340147.8       0.00      40.00      40.00      40.00
 CH3CCl3          1976.0   382454.4        0.0   391870.2      45.52    19112.5   344984.7   382454.5   419924.4        0.0        0.0        0.0        0.0    13592.6   366194.9   391490.5   419674.9       0.00      45.52      45.52      45.52
 CH3CCl3          1977.0   462299.3        0.0   473356.5      53.05    23102.6   417007.1   462299.4   507591.9        0.0        0.0        0.0        0.0    16301.5   442548.4   472905.4   506711.8       0.00      53.05      53.05      53.05
 CH3CCl3          1978.0   558367.5        0.0   571465.0      62.52    27903.5   503663.4   558367.8   613072.3        0.0        0.0        0.0        0.0    19588.8   534443.7   570927.8   611566.3       0.00      62.52      62.52      62.52
 CH3CCl3          1979.0   504137.6        0.0   518905.2      74.24    25193.4   454746.5   504137.8   553529.3        0.0        0.0        0.0        0.0    18920.9   483098.4   518396.2   557451.3       0.00      74.24      74.24      74.24
 CH3CCl3          1980.0   521240.3        0.0   537308.5      81.60    26048.1   470173.6   521240.6   572307.6        0.0        0.0        0.0        0.0    19928.4   499553.0   536770.3   577904.4       0.00      81.60      81.60      81.60
 CH3CCl3          1981.0   501963.7        0.0   519049.4      88.33    25084.8   452785.5   501963.9   551142.4        0.0        0.0        0.0        0.0    19962.6   481108.1   518523.1   559671.0       0.00      88.33      88.33      88.33
 CH3CCl3          1982.0   510131.0        0.0   528036.4      93.04    25492.9   460152.7   510131.2   560109.8        0.0        0.0        0.0        0.0    20556.2   488966.6   527495.8   569838.8       0.00      93.04      93.04      93.04
 CH3CCl3          1983.0   534154.1        0.0   552871.9      97.24    26693.5   481822.2   534154.3   586486.6        0.0        0.0        0.0        0.0    21508.9   511990.0   552306.1   596609.6       0.00      97.24      97.24      97.24
 CH3CCl3          1984.0   554854.3        0.0   574406.5     101.66    27727.9   500494.4   554854.5   609214.9        0.0        0.0        0.0        0.0    22397.0   531834.6   573819.3   619967.3       0.00     101.66     101.66     101.66
 CH3CCl3          1985.0   558716.3        0.0   579028.0     106.14    27920.9   503977.9   558716.5   613455.1        0.0        0.0        0.0        0.0    22868.4   535548.4   578441.5   625524.8       0.00     106.14     106.14     106.14
 CH3CCl3          1986.0   538470.9        0.0   559315.7     109.97    26909.2   485716.1   538471.1   591226.4        0.0        0.0        0.0        0.0    22697.8   516105.8   558732.8   605458.8       0.00     109.97     109.97     109.97
 CH3CCl3          1987.0   631306.5        0.0   652989.7     112.27    31548.5   569456.4   631306.8   693157.3        0.0        0.0        0.0        0.0    25202.6   605100.6   652329.8   704273.1       0.00     112.27     112.27     112.27
 CH3CCl3          1988.0   626290.8        0.0   648893.8     117.98    31297.8   564932.1   626291.0   687650.1        0.0        0.0        0.0        0.0    25550.1   600319.0   648233.1   700848.4       0.00     117.98     117.98     117.98
 CH3CCl3          1989.0   651887.6        0.0   675356.8     122.45    32577.0   588021.2   651887.9   715754.8        0.0        0.0        0.0        0.0    26564.8   624851.4   674664.9   729365.0       0.00     122.45     122.45     122.45
 CH3CCl3          1990.0   627649.8        0.0   651778.9     127.17    31365.8   566157.9   627650.0   689142.3        0.0        0.0        0.0        0.0    26368.7   601604.9   651106.6   705380.1       0.00     127.17     127.17     127.17
 CH3CCl3          1991.0   604021.6        0.0   628507.2     130.03    30185.0   544844.7   604021.9   663199.2        0.0        0.0        0.0        0.0    26049.1   578847.8   627870.4   681431.8       0.00     130.03     130.03     130.03
 CH3CCl3          1992.0   545910.6        0.0   570335.2     131.40    27281.0   492426.8   545910.8   599394.9        0.0        0.0        0.0        0.0    24809.0   522948.8   569765.1   620596.2       0.00     131.40     131.40     131.40
 CH3CCl3          1993.0   363163.3        0.0   386473.4     130.12    18148.5   327583.7   363163.5   398743.4        0.0        0.0        0.0        0.0    20784.4   346704.3   386079.4   428330.6       0.00     130.12     130.12     130.12
 CH3CCl3          1994.0   260731.8        0.0   282115.0     121.52    13029.6   235187.5   260731.9   286276.4        0.0        0.0        0.0        0.0    17989.6   247580.5   281835.0   318179.6       0.00     121.52     121.52     121.52
 CH3CCl3          1995.0   181703.7        0.0   200833.6     110.26     9080.3   163901.9   181703.8   199505.7        0.0        0.0        0.0        0.0    15460.7   171000.8   200621.3   231765.0       0.00     110.26     110.26     110.26
 CH3CCl3          1996.0    81245.8        0.0    97814.9      97.77     4060.1    73286.0    81245.8    89205.6        0.0        0.0        0.0        0.0    12730.8    73083.3    97703.6   123024.2       0.00      97.77      97.77      97.77
 CH3CCl3          1997.0    56485.9        0.0    70556.7      83.41     2822.8    50951.9    56485.9    62020.0        0.0        0.0        0.0        0.0    10740.0    49659.6    70470.5    91781.8       0.00      83.41      83.41      83.41
 CH3CCl3          1998.0    36800.3        0.0    48659.5      70.62     1839.0    33195.0    36800.4    40405.8        0.0        0.0        0.0        0.0     9001.6    31133.8    48609.6    66433.0       0.00      70.62      70.62      70.62
 CH3CCl3          1999.0    26289.4        0.0    36231.2      59.34     1313.8    23713.8    26289.4    28865.0        0.0        0.0        0.0        0.0     7528.6    21570.3    36190.9    51091.0       0.00      59.34      59.34      59.34
 CH3CCl3          2000.0    22811.2        0.0    31136.6      49.67     1140.0    20576.3    22811.2    25046.1        0.0        0.0        0.0        0.0     6307.5    18856.2    31103.1    43585.9       0.00      49.67      49.67      49.67
 CH3CCl3          2001.0    13955.2        0.0    20903.8      41.61      697.4    12588.0    13955.2    15322.5        0.0        0.0        0.0        0.0     5247.8    10674.1    20872.6    31263.5       0.00      41.61      41.61      41.61
 CH3CCl3          2002.0    12231.5        0.0    18019.8      34.64      611.2    11033.2    12231.5    13429.9        0.0        0.0        0.0        0.0     4373.3     9493.6    17995.6    26650.5       0.00      34.64      34.64      34.64
 CH3CCl3          2003.0    12337.9        0.0    17172.2      28.87      616.6    11129.2    12337.9    13546.7        0.0        0.0        0.0        0.0     3659.2    10045.8    17153.1    24393.1       0.00      28.87      28.87      28.87
 CH3CCl3          2004.0     7670.1        0.0    11700.2      24.14      383.3     6918.7     7670.1     8421.6        0.0        0.0        0.0        0.0     3042.4     5767.3    11683.1    17704.4       0.00      24.14      24.14      24.14
 CH3CCl3          2005.0     6974.2        0.0    10329.4      20.08      348.5     6291.0     6974.2     7657.5        0.0        0.0        0.0        0.0     2534.7     5389.1    10315.0    15332.4       0.00      20.08      20.08      20.08
 CH3CCl3          2006.0     9342.4        0.0    12155.2      16.73      466.9     8427.1     9342.4    10257.7        0.0        0.0        0.0        0.0     2137.5     7995.3    12142.7    16378.7       0.00      16.73      16.73      16.73
 CH3CCl3          2007.0     4624.8        0.0     6976.3      14.08      231.1     4171.7     4624.8     5077.9        0.0        0.0        0.0        0.0     1775.7     3514.0     6966.3    10481.6       0.00      14.08      14.08      14.08
 CH3CCl3          2008.0     5907.8        0.0     7875.4      11.72      295.2     5329.0     5907.8     6486.6        0.0        0.0        0.0        0.0     1492.5     4968.9     7867.0    10822.0       0.00      11.72      11.72      11.72
 CH3CCl3          2009.0     6903.9        0.0     6903.9       9.84      345.0     6227.5     6903.9     7580.3        0.0        0.0        0.0        0.0      345.0     6227.5     6903.9     7580.3       0.00       9.84       9.84       9.84
 CH3CCl3          2010.0     6903.9        0.0     6903.9       8.27      345.0     6227.5     6903.9     7580.3        0.0        0.0        0.0        0.0      345.0     6227.5     6903.9     7580.3       0.05       8.17       8.27       8.38
 CH3CCl3          2011.0     6903.9        0.0     6903.9       7.00      345.0     6227.5     6903.9     7580.3        0.0        0.0        0.0        0.0      345.0     6227.5     6903.9     7580.3       0.09       6.83       7.00       7.18
 CH3CCl3          2012.0     6903.9        0.0     6903.9       5.97      345.0     6227.5     6903.9     7580.3        0.0        0.0        0.0        0.0      345.0     6227.5     6903.9     7580.3       0.11       5.75       5.97       6.19
 CH3CCl3          2013.0     6903.9        0.0     6903.9       5.13      345.0     6227.5     6903.9     7580.3        0.0        0.0        0.0        0.0      345.0     6227.5     6903.9     7580.3       0.13       4.89       5.13       5.38
 CH3CCl3          2014.0     6903.9        0.0     6903.9       4.45      345.0     6227.5     6903.9     7580.3        0.0        0.0        0.0        0.0      345.0     6227.5     6903.9     7580.3       0.13       4.19       4.45       4.72
 CH3CCl3          2015.0        0.0        0.0        0.0       3.90        0.0        0.0        0.0        0.0        0.0        0.0        0.0        0.0        0.0        0.0        0.0        0.0       0.14       3.64       3.90       4.17
 CH3CCl3          2016.0        0.0        0.0        0.0       3.17        0.0        0.0        0.0        0.0        0.0        0.0        0.0        0.0        0.0        0.0        0.0        0.0       0.13       2.92       3.16       3.43
 CH3CCl3          2017.0        0.0        0.0        0.0       2.57        0.0        0.0        0.0        0.0        0.0        0.0        0.0        0.0        0.0        0.0        0.0        0.0       0.12       2.34       2.57       2.81
 CH3CCl3          2018.0        0.0        0.0        0.0       2.09        0.0        0.0        0.0        0.0        0.0        0.0        0.0        0.0        0.0        0.0        0.0        0.0       0.11       1.88       2.09       2.31
 CH3CCl3          2019.0        0.0        0.0        0.0       1.70        0.0        0.0        0.0        0.0        0.0        0.0        0.0        0.0        0.0        0.0        0.0        0.0       0.10       1.51       1.69       1.90
 CH3CCl3          2020.0        0.0        0.0        0.0       1.38        0.0        0.0        0.0        0.0        0.0        0.0        0.0        0.0        0.0        0.0        0.0        0.0       0.09       1.21       1.37       1.56
 CH3CCl3          2021.0        0.0        0.0        0.0       1.12        0.0        0.0        0.0        0.0        0.0        0.0        0.0        0.0        0.0        0.0        0.0        0.0       0.08       0.97       1.12       1.28
 CH3CCl3          2022.0        0.0        0.0        0.0       0.91        0.0        0.0        0.0        0.0        0.0        0.0        0.0        0.0        0.0        0.0        0.0        0.0       0.07       0.78       0.91       1.05
 CH3CCl3          2023.0        0.0        0.0        0.0       0.74        0.0        0.0        0.0        0.0        0.0        0.0        0.0        0.0        0.0        0.0        0.0        0.0       0.06       0.63       0.74       0.87
 CH3CCl3          2024.0        0.0        0.0        0.0       0.60        0.0        0.0        0.0        0.0        0.0        0.0        0.0        0.0        0.0        0.0        0.0        0.0       0.05       0.50       0.60       0.71
 CH3CCl3          2025.0        0.0        0.0        0.0       0.49        0.0        0.0        0.0        0.0        0.0        0.0        0.0        0.0        0.0        0.0        0.0        0.0       0.05       0.40       0.49       0.58
 CH3CCl3          2026.0        0.0        0.0        0.0       0.40        0.0        0.0        0.0        0.0        0.0        0.0        0.0        0.0        0.0        0.0        0.0        0.0       0.04       0.32       0.39       0.48
 CH3CCl3          2027.0        0.0        0.0        0.0       0.32        0.0        0.0        0.0        0.0        0.0        0.0        0.0        0.0        0.0        0.0        0.0        0.0       0.03       0.26       0.32       0.39
 CH3CCl3          2028.0        0.0        0.0        0.0       0.26        0.0        0.0        0.0        0.0        0.0        0.0        0.0        0.0        0.0        0.0        0.0        0.0       0.03       0.21       0.26       0.32
 CH3CCl3          2029.0        0.0        0.0        0.0       0.21        0.0        0.0        0.0        0.0        0.0        0.0        0.0        0.0        0.0        0.0        0.0        0.0       0.03       0.17       0.21       0.27
 CH3CCl3          2030.0        0.0        0.0        0.0       0.17        0.0        0.0        0.0        0.0        0.0        0.0        0.0        0.0        0.0        0.0        0.0        0.0       0.02       0.13       0.17       0.22
 CH3CCl3          2031.0        0.0        0.0        0.0       0.14        0.0        0.0        0.0        0.0        0.0        0.0        0.0        0.0        0.0        0.0        0.0        0.0       0.02       0.11       0.14       0.18
 CH3CCl3          2032.0        0.0        0.0        0.0       0.11        0.0        0.0        0.0        0.0        0.0        0.0        0.0        0.0        0.0        0.0        0.0        0.0       0.02       0.09       0.11       0.15
 CH3CCl3          2033.0        0.0        0.0        0.0       0.09        0.0        0.0        0.0        0.0        0.0        0.0        0.0        0.0        0.0        0.0        0.0        0.0       0.01       0.07       0.09       0.12
 CH3CCl3          2034.0        0.0        0.0        0.0       0.08        0.0        0.0        0.0        0.0        0.0        0.0        0.0        0.0        0.0        0.0        0.0        0.0       0.01       0.06       0.07       0.10
 CH3CCl3          2035.0        0.0        0.0        0.0       0.06        0.0        0.0        0.0        0.0        0.0        0.0        0.0        0.0        0.0        0.0        0.0        0.0       0.01       0.04       0.06       0.08
 CH3CCl3          2036.0        0.0        0.0        0.0       0.05        0.0        0.0        0.0        0.0        0.0        0.0        0.0        0.0        0.0        0.0        0.0        0.0       0.01       0.04       0.05       0.07
 CH3CCl3          2037.0        0.0        0.0        0.0       0.04        0.0        0.0        0.0        0.0        0.0        0.0        0.0        0.0        0.0        0.0        0.0        0.0       0.01       0.03       0.04       0.06
 CH3CCl3          2038.0        0.0        0.0        0.0       0.03        0.0        0.0        0.0        0.0        0.0        0.0        0.0        0.0        0.0        0.0        0.0        0.0       0.01       0.02       0.03       0.05
 CH3CCl3          2039.0        0.0        0.0        0.0       0.03        0.0        0.0        0.0        0.0        0.0        0.0        0.0        0.0        0.0        0.0        0.0        0.0       0.00       0.02       0.03       0.04
 CH3CCl3          2040.0        0.0        0.0        0.0       0.02        0.0        0.0        0.0        0.0        0.0        0.0        0.0        0.0        0.0        0.0        0.0        0.0       0.00       0.01       0.02       0.03
 CH3CCl3          2041.0        0.0        0.0        0.0       0.02        0.0        0.0        0.0        0.0        0.0        0.0        0.0        0.0        0.0        0.0        0.0        0.0       0.00       0.01       0.02       0.03
 CH3CCl3          2042.0        0.0        0.0        0.0       0.01        0.0        0.0        0.0        0.0        0.0        0.0        0.0        0.0        0.0        0.0        0.0        0.0       0.00       0.01       0.01       0.02
 CH3CCl3          2043.0        0.0        0.0        0.0       0.01        0.0        0.0        0.0        0.0        0.0        0.0        0.0        0.0        0.0        0.0        0.0        0.0       0.00       0.01       0.01       0.02
 CH3CCl3          2044.0        0.0        0.0        0.0       0.01        0.0        0.0        0.0        0.0        0.0        0.0        0.0        0.0        0.0        0.0        0.0        0.0       0.00       0.01       0.01       0.01
 CH3CCl3          2045.0        0.0        0.0        0.0       0.01        0.0        0.0        0.0        0.0        0.0        0.0        0.0        0.0        0.0        0.0        0.0        0.0       0.00       0.00       0.01       0.01
 CH3CCl3          2046.0        0.0        0.0        0.0       0.01        0.0        0.0        0.0        0.0        0.0        0.0        0.0        0.0        0.0        0.0        0.0        0.0       0.00       0.00       0.01       0.01
 CH3CCl3          2047.0        0.0        0.0        0.0       0.01        0.0        0.0        0.0        0.0        0.0        0.0        0.0        0.0        0.0        0.0        0.0        0.0       0.00       0.00       0.00       0.01
 CH3CCl3          2048.0        0.0        0.0        0.0       0.00        0.0        0.0        0.0        0.0        0.0        0.0        0.0        0.0        0.0        0.0        0.0        0.0       0.00       0.00       0.00       0.01
 CH3CCl3          2049.0        0.0        0.0        0.0       0.00        0.0        0.0        0.0        0.0        0.0        0.0        0.0        0.0        0.0        0.0        0.0        0.0       0.00       0.00       0.00       0.01
 CH3CCl3          2050.0        0.0        0.0        0.0       0.00        0.0        0.0        0.0        0.0        0.0        0.0        0.0        0.0        0.0        0.0        0.0        0.0       0.00       0.00       0.00       0.00
 CH3CCl3          2051.0        0.0        0.0        0.0       0.00        0.0        0.0        0.0        0.0        0.0        0.0        0.0        0.0        0.0        0.0        0.0        0.0       0.00       0.00       0.00       0.00
 CH3CCl3          2052.0        0.0        0.0        0.0       0.00        0.0        0.0        0.0        0.0        0.0        0.0        0.0        0.0        0.0        0.0        0.0        0.0       0.00       0.00       0.00       0.00
 CH3CCl3          2053.0        0.0        0.0        0.0       0.00        0.0        0.0        0.0        0.0        0.0        0.0        0.0        0.0        0.0        0.0        0.0        0.0       0.00       0.00       0.00       0.00
 CH3CCl3          2054.0        0.0        0.0        0.0       0.00        0.0        0.0        0.0        0.0        0.0        0.0        0.0        0.0        0.0        0.0        0.0        0.0       0.00       0.00       0.00       0.00
 CH3CCl3          2055.0        0.0        0.0        0.0       0.00        0.0        0.0        0.0        0.0        0.0        0.0        0.0        0.0        0.0        0.0        0.0        0.0       0.00       0.00       0.00       0.00
 CH3CCl3          2056.0        0.0        0.0        0.0       0.00        0.0        0.0        0.0        0.0        0.0        0.0        0.0        0.0        0.0        0.0        0.0        0.0       0.00       0.00       0.00       0.00
 CH3CCl3          2057.0        0.0        0.0        0.0       0.00        0.0        0.0        0.0        0.0        0.0        0.0        0.0        0.0        0.0        0.0        0.0        0.0       0.00       0.00       0.00       0.00
 CH3CCl3          2058.0        0.0        0.0        0.0       0.00        0.0        0.0        0.0        0.0        0.0        0.0        0.0        0.0        0.0        0.0        0.0        0.0       0.00       0.00       0.00       0.00
 CH3CCl3          2059.0        0.0        0.0        0.0       0.00        0.0        0.0        0.0        0.0        0.0        0.0        0.0        0.0        0.0        0.0        0.0        0.0       0.00       0.00       0.00       0.00
 CH3CCl3          2060.0        0.0        0.0        0.0       0.00        0.0        0.0        0.0        0.0        0.0        0.0        0.0        0.0        0.0        0.0        0.0        0.0       0.00       0.00       0.00       0.00
 CH3CCl3          2061.0        0.0        0.0        0.0       0.00        0.0        0.0        0.0        0.0        0.0        0.0        0.0        0.0        0.0        0.0        0.0        0.0       0.00       0.00       0.00       0.00
 CH3CCl3          2062.0        0.0        0.0        0.0       0.00        0.0        0.0        0.0        0.0        0.0        0.0        0.0        0.0        0.0        0.0        0.0        0.0       0.00       0.00       0.00       0.00
 CH3CCl3          2063.0        0.0        0.0        0.0       0.00        0.0        0.0        0.0        0.0        0.0        0.0        0.0        0.0        0.0        0.0        0.0        0.0       0.00       0.00       0.00       0.00
 CH3CCl3          2064.0        0.0        0.0        0.0       0.00        0.0        0.0        0.0        0.0        0.0        0.0        0.0        0.0        0.0        0.0        0.0        0.0       0.00       0.00       0.00       0.00
 CH3CCl3          2065.0        0.0        0.0        0.0       0.00        0.0        0.0        0.0        0.0        0.0        0.0        0.0        0.0        0.0        0.0        0.0        0.0       0.00       0.00       0.00       0.00
 CH3CCl3          2066.0        0.0        0.0        0.0       0.00        0.0        0.0        0.0        0.0        0.0        0.0        0.0        0.0        0.0        0.0        0.0        0.0       0.00       0.00       0.00       0.00
 CH3CCl3          2067.0        0.0        0.0        0.0       0.00        0.0        0.0        0.0        0.0        0.0        0.0        0.0        0.0        0.0        0.0        0.0        0.0       0.00       0.00       0.00       0.00
 CH3CCl3          2068.0        0.0        0.0        0.0       0.00        0.0        0.0        0.0        0.0        0.0        0.0        0.0        0.0        0.0        0.0        0.0        0.0       0.00       0.00       0.00       0.00
 CH3CCl3          2069.0        0.0        0.0        0.0       0.00        0.0        0.0        0.0        0.0        0.0        0.0        0.0        0.0        0.0        0.0        0.0        0.0       0.00       0.00       0.00       0.00
 CH3CCl3          2070.0        0.0        0.0        0.0       0.00        0.0        0.0        0.0        0.0        0.0        0.0        0.0        0.0        0.0        0.0        0.0        0.0       0.00       0.00       0.00       0.00
 CH3CCl3          2071.0        0.0        0.0        0.0       0.00        0.0        0.0        0.0        0.0        0.0        0.0        0.0        0.0        0.0        0.0        0.0        0.0       0.00       0.00       0.00       0.00
 CH3CCl3          2072.0        0.0        0.0        0.0       0.00        0.0        0.0        0.0        0.0        0.0        0.0        0.0        0.0        0.0        0.0        0.0        0.0       0.00       0.00       0.00       0.00
 CH3CCl3          2073.0        0.0        0.0        0.0       0.00        0.0        0.0        0.0        0.0        0.0        0.0        0.0        0.0        0.0        0.0        0.0        0.0       0.00       0.00       0.00       0.00
 CH3CCl3          2074.0        0.0        0.0        0.0       0.00        0.0        0.0        0.0        0.0        0.0        0.0        0.0        0.0        0.0        0.0        0.0        0.0       0.00       0.00       0.00       0.00
 CH3CCl3          2075.0        0.0        0.0        0.0       0.00        0.0        0.0        0.0        0.0        0.0        0.0        0.0        0.0        0.0        0.0        0.0        0.0       0.00       0.00       0.00       0.00
 CH3CCl3          2076.0        0.0        0.0        0.0       0.00        0.0        0.0        0.0        0.0        0.0        0.0        0.0        0.0        0.0        0.0        0.0        0.0       0.00       0.00       0.00       0.00
 CH3CCl3          2077.0        0.0        0.0        0.0       0.00        0.0        0.0        0.0        0.0        0.0        0.0        0.0        0.0        0.0        0.0        0.0        0.0       0.00       0.00       0.00       0.00
 CH3CCl3          2078.0        0.0        0.0        0.0       0.00        0.0        0.0        0.0        0.0        0.0        0.0        0.0        0.0        0.0        0.0        0.0        0.0       0.00       0.00       0.00       0.00
 CH3CCl3          2079.0        0.0        0.0        0.0       0.00        0.0        0.0        0.0        0.0        0.0        0.0        0.0        0.0        0.0        0.0        0.0        0.0       0.00       0.00       0.00       0.00
 CH3CCl3          2080.0        0.0        0.0        0.0       0.00        0.0        0.0        0.0        0.0        0.0        0.0        0.0        0.0        0.0        0.0        0.0        0.0       0.00       0.00       0.00       0.00
 CH3CCl3          2081.0        0.0        0.0        0.0       0.00        0.0        0.0        0.0        0.0        0.0        0.0        0.0        0.0        0.0        0.0        0.0        0.0       0.00       0.00       0.00       0.00
 CH3CCl3          2082.0        0.0        0.0        0.0       0.00        0.0        0.0        0.0        0.0        0.0        0.0        0.0        0.0        0.0        0.0        0.0        0.0       0.00       0.00       0.00       0.00
 CH3CCl3          2083.0        0.0        0.0        0.0       0.00        0.0        0.0        0.0        0.0        0.0        0.0        0.0        0.0        0.0        0.0        0.0        0.0       0.00       0.00       0.00       0.00
 CH3CCl3          2084.0        0.0        0.0        0.0       0.00        0.0        0.0        0.0        0.0        0.0        0.0        0.0        0.0        0.0        0.0        0.0        0.0       0.00       0.00       0.00       0.00
 CH3CCl3          2085.0        0.0        0.0        0.0       0.00        0.0        0.0        0.0        0.0        0.0        0.0        0.0        0.0        0.0        0.0        0.0        0.0       0.00       0.00       0.00       0.00
 CH3CCl3          2086.0        0.0        0.0        0.0       0.00        0.0        0.0        0.0        0.0        0.0        0.0        0.0        0.0        0.0        0.0        0.0        0.0       0.00       0.00       0.00       0.00
 CH3CCl3          2087.0        0.0        0.0        0.0       0.00        0.0        0.0        0.0        0.0        0.0        0.0        0.0        0.0        0.0        0.0        0.0        0.0       0.00       0.00       0.00       0.00
 CH3CCl3          2088.0        0.0        0.0        0.0       0.00        0.0        0.0        0.0        0.0        0.0        0.0        0.0        0.0        0.0        0.0        0.0        0.0       0.00       0.00       0.00       0.00
 CH3CCl3          2089.0        0.0        0.0        0.0       0.00        0.0        0.0        0.0        0.0        0.0        0.0        0.0        0.0        0.0        0.0        0.0        0.0       0.00       0.00       0.00       0.00
 CH3CCl3          2090.0        0.0        0.0        0.0       0.00        0.0        0.0        0.0        0.0        0.0        0.0        0.0        0.0        0.0        0.0        0.0        0.0       0.00       0.00       0.00       0.00
 CH3CCl3          2091.0        0.0        0.0        0.0       0.00        0.0        0.0        0.0        0.0        0.0        0.0        0.0        0.0        0.0        0.0        0.0        0.0       0.00       0.00       0.00       0.00
 CH3CCl3          2092.0        0.0        0.0        0.0       0.00        0.0        0.0        0.0        0.0        0.0        0.0        0.0        0.0        0.0        0.0        0.0        0.0       0.00       0.00       0.00       0.00
 CH3CCl3          2093.0        0.0        0.0        0.0       0.00        0.0        0.0        0.0        0.0        0.0        0.0        0.0        0.0        0.0        0.0        0.0        0.0       0.00       0.00       0.00       0.00
 CH3CCl3          2094.0        0.0        0.0        0.0       0.00        0.0        0.0        0.0        0.0        0.0        0.0        0.0        0.0        0.0        0.0        0.0        0.0       0.00       0.00       0.00       0.00
 CH3CCl3          2095.0        0.0        0.0        0.0       0.00        0.0        0.0        0.0        0.0        0.0        0.0        0.0        0.0        0.0        0.0        0.0        0.0       0.00       0.00       0.00       0.00
 CH3CCl3          2096.0        0.0        0.0        0.0       0.00        0.0        0.0        0.0        0.0        0.0        0.0        0.0        0.0        0.0        0.0        0.0        0.0       0.00       0.00       0.00       0.00
 CH3CCl3          2097.0        0.0        0.0        0.0       0.00        0.0        0.0        0.0        0.0        0.0        0.0        0.0        0.0        0.0        0.0        0.0        0.0       0.00       0.00       0.00       0.00
 CH3CCl3          2098.0        0.0        0.0        0.0       0.00        0.0        0.0        0.0        0.0        0.0        0.0        0.0        0.0        0.0        0.0        0.0        0.0       0.00       0.00       0.00       0.00
 CH3CCl3          2099.0        0.0        0.0        0.0       0.00        0.0        0.0        0.0        0.0        0.0        0.0        0.0        0.0        0.0        0.0        0.0        0.0       0.00       0.00       0.00       0.00
 CH3CCl3          2100.0        0.0        0.0        0.0       0.00        0.0        0.0        0.0        0.0        0.0        0.0        0.0        0.0        0.0        0.0        0.0        0.0       0.00       0.00       0.00       0.00
 CH3CCl3          2101.0        0.0        0.0        0.0       0.00        0.0        0.0        0.0        0.0        0.0        0.0        0.0        0.0        0.0        0.0        0.0        0.0       0.00       0.00       0.00       0.00
 CH3CCl3          2102.0        0.0        0.0        0.0       0.00        0.0        0.0        0.0        0.0        0.0        0.0        0.0        0.0        0.0        0.0        0.0        0.0       0.00       0.00       0.00       0.00
 CH3CCl3          2103.0        0.0        0.0        0.0       0.00        0.0        0.0        0.0        0.0        0.0        0.0        0.0        0.0        0.0        0.0        0.0        0.0       0.00       0.00       0.00       0.00
 CH3CCl3          2104.0        0.0        0.0        0.0       0.00        0.0        0.0        0.0        0.0        0.0        0.0        0.0        0.0        0.0        0.0        0.0        0.0       0.00       0.00       0.00       0.00
 CH3CCl3          2105.0        0.0        0.0        0.0       0.00        0.0        0.0        0.0        0.0        0.0        0.0        0.0        0.0        0.0        0.0        0.0        0.0       0.00       0.00       0.00       0.00
 CH3CCl3          2106.0        0.0        0.0        0.0       0.00        0.0        0.0        0.0        0.0        0.0        0.0        0.0        0.0        0.0        0.0        0.0        0.0       0.00       0.00       0.00       0.00
 CH3CCl3          2107.0        0.0        0.0        0.0       0.00        0.0        0.0        0.0        0.0        0.0        0.0        0.0        0.0        0.0        0.0        0.0        0.0       0.00       0.00       0.00       0.00
 CH3CCl3          2108.0        0.0        0.0        0.0       0.00        0.0        0.0        0.0        0.0        0.0        0.0        0.0        0.0        0.0        0.0        0.0        0.0       0.00       0.00       0.00       0.00
 CH3CCl3          2109.0        0.0        0.0        0.0       0.00        0.0        0.0        0.0        0.0        0.0        0.0        0.0        0.0        0.0        0.0        0.0        0.0       0.00       0.00       0.00       0.00
 CH3CCl3          2110.0        0.0        0.0        0.0       0.00        0.0        0.0        0.0        0.0        0.0        0.0        0.0        0.0        0.0        0.0        0.0        0.0       0.00       0.00       0.00       0.00
 CH3CCl3          2111.0        0.0        0.0        0.0       0.00        0.0        0.0        0.0        0.0        0.0        0.0        0.0        0.0        0.0        0.0        0.0        0.0       0.00       0.00       0.00       0.00
 CH3CCl3          2112.0        0.0        0.0        0.0       0.00        0.0        0.0        0.0        0.0        0.0        0.0        0.0        0.0        0.0        0.0        0.0        0.0       0.00       0.00       0.00       0.00
 CH3CCl3          2113.0        0.0        0.0        0.0       0.00        0.0        0.0        0.0        0.0        0.0        0.0        0.0        0.0        0.0        0.0        0.0        0.0       0.00       0.00       0.00       0.00
 CH3CCl3          2114.0        0.0        0.0        0.0       0.00        0.0        0.0        0.0        0.0        0.0        0.0        0.0        0.0        0.0        0.0        0.0        0.0       0.00       0.00       0.00       0.00
 CH3CCl3          2115.0        0.0        0.0        0.0       0.00        0.0        0.0        0.0        0.0        0.0        0.0        0.0        0.0        0.0        0.0        0.0        0.0       0.00       0.00       0.00       0.00
 CH3CCl3          2116.0        0.0        0.0        0.0       0.00        0.0        0.0        0.0        0.0        0.0        0.0        0.0        0.0        0.0        0.0        0.0        0.0       0.00       0.00       0.00       0.00
 CH3CCl3          2117.0        0.0        0.0        0.0       0.00        0.0        0.0        0.0        0.0        0.0        0.0        0.0        0.0        0.0        0.0        0.0        0.0       0.00       0.00       0.00       0.00
 CH3CCl3          2118.0        0.0        0.0        0.0       0.00        0.0        0.0        0.0        0.0        0.0        0.0        0.0        0.0        0.0        0.0        0.0        0.0       0.00       0.00       0.00       0.00
 CH3CCl3          2119.0        0.0        0.0        0.0       0.00        0.0        0.0        0.0        0.0        0.0        0.0        0.0        0.0        0.0        0.0        0.0        0.0       0.00       0.00       0.00       0.00
 CH3CCl3          2120.0        0.0        0.0        0.0       0.00        0.0        0.0        0.0        0.0        0.0        0.0        0.0        0.0        0.0        0.0        0.0        0.0       0.00       0.00       0.00       0.00
 
 Species            Year  Prod_mean  Bank_mean  Emis_mean   Mix_mean  Prod_stdv  Prod_2.5p   Prod_50p Prod_97.5p  Bank_stdv  Bank_2.5p   Bank_50p Bank_97.5p  Emis_stdv  Emis_2.5p   Emis_50p Emis_97.5p   Mix_stdv   Mix_2.5p    Mix_50p  Mix_97.5p
 HCFC-22          1950.0      771.1  -171325.0     1966.6       0.89       38.5      695.6      771.1      846.7   810178.7 -1751076.1  -175496.6  1433000.9      184.9     1610.0     1964.7     2334.8       0.00       0.89       0.89       0.89
 HCFC-22          1951.0      997.9  -172520.6      729.9       0.95       49.9      900.1      997.9     1095.7   810005.6 -1751936.4  -176686.7  1431471.1      179.7      380.5      728.9     1085.2       0.00       0.95       0.95       0.95
 HCFC-22          1952.0     1587.6  -172252.6     1044.6       0.92       79.3     1432.0     1587.6     1743.1   809833.3 -1751302.8  -176430.1  1431445.5      178.2      698.8     1043.4     1397.3       0.00       0.92       0.92       0.92
 HCFC-22          1953.0     2177.2  -171709.6     1438.4       0.92      108.8     1963.9     2177.2     2390.6   809645.8 -1750382.0  -175873.1  1431664.1      182.6     1085.2     1436.9     1800.0       0.00       0.92       0.92       0.92
 HCFC-22          1954.0     2903.0  -170970.7     1906.2       0.94      145.1     2618.6     2903.0     3187.4   809438.7 -1749275.1  -175098.6  1431974.0      193.3     1533.1     1904.4     2290.3       0.00       0.94       0.94       0.94
 HCFC-22          1955.0     3719.5  -169974.0     2976.4       1.00      185.9     3355.1     3719.5     4083.9   809203.6 -1747787.6  -174083.6  1432525.4      220.2     2552.1     2973.4     3416.9       0.00       1.00       1.00       1.00
 HCFC-22          1956.0     6078.1  -169230.9     3483.0       1.12      303.7     5482.7     6078.1     6673.6   808926.3 -1746516.0  -173349.0  1432692.0      249.6     3002.5     3479.6     3982.1       0.00       1.12       1.12       1.12
 HCFC-22          1957.0     6304.9  -166635.7     4255.0       1.26      315.1     5687.2     6304.9     6922.6   808564.6 -1743256.6  -170737.5  1434529.3      288.0     3701.2     4250.9     4832.1       0.00       1.26       1.26       1.26
 HCFC-22          1958.0     7575.0  -164585.8     6013.7       1.45      378.5     6832.9     7575.0     8317.1   808166.3 -1740487.0  -168736.0  1435835.6      353.2     5336.9     6007.5     6723.3       0.00       1.45       1.45       1.45
 HCFC-22          1959.0    11249.1  -163024.5     7066.5       1.74      562.2    10147.0    11249.1    12351.2   807686.3 -1738098.9  -167175.9  1436565.6      420.6     6260.0     7059.4     7911.6       0.00       1.74       1.74       1.74
 HCFC-22          1960.0    12156.3  -158841.9     7665.5       2.08      607.5    10965.3    12156.3    13347.3   807056.9 -1732667.4  -163011.9  1439631.1      486.4     6731.0     7657.8     8641.8       0.00       2.08       2.08       2.08
 HCFC-22          1961.0    12156.3  -154351.2     9433.9       2.43      607.5    10965.3    12156.3    13347.3   806348.1 -1726675.1  -158451.1  1442800.0      578.1     8324.1     9424.3    10594.9       0.00       2.43       2.43       2.43
 HCFC-22          1962.0    15422.1  -151628.8    11583.7       2.87      770.7    13911.2    15422.1    16933.1   805566.4 -1722572.3  -155701.6  1444072.0      692.3    10255.9    11571.9    12974.5       0.00       2.87       2.87       2.87
 HCFC-22          1963.0    17554.0  -147790.4    14409.3       3.42      877.2    15834.3    17554.0    19273.9   804610.1 -1716999.5  -151924.9  1446099.4      837.9    12804.2    14394.5    16092.6       0.00       3.42       3.42       3.42
 HCFC-22          1964.0    22362.1  -144645.6    16796.7       4.12     1117.5    20171.3    22362.1    24553.0   803484.0 -1711651.1  -148776.8  1446903.1      997.2    14884.6    16779.5    18800.8       0.00       4.12       4.12       4.12
 HCFC-22          1965.0    25083.7  -139080.2    20532.4       4.92     1253.5    22626.2    25083.7    27541.2   802104.1 -1703575.4  -143040.9  1449781.4     1201.3    18230.5    20511.3    22946.7       0.00       4.92       4.92       4.92
 HCFC-22          1966.0    31524.7  -134529.0    24534.1       5.91     1575.4    28436.2    31524.7    34613.3   800491.7 -1695784.5  -138463.2  1451011.3     1440.4    21773.9    24508.8    27428.6       0.00       5.91       5.91       5.91
 HCFC-22          1967.0    37330.7  -127538.4    29844.0       7.09     1865.5    33673.4    37330.7    40988.1   798521.5 -1685020.3  -131490.0  1453591.8     1736.7    26517.0    29813.4    33333.3       0.00       7.09       7.09       7.09
 HCFC-22          1968.0    46000.0  -120051.8    36248.5       8.53     2298.8    41493.4    46000.0    50506.8   796166.3 -1673018.5  -124047.9  1456360.6     2097.3    32229.7    36210.9    40462.4       0.00       8.53       8.53       8.53
 HCFC-22          1969.0    56100.0  -110300.2    39415.9      10.29     2803.5    50603.9    56100.0    61596.3   793301.5 -1657699.1  -114337.5  1460452.8     2440.6    34730.4    39376.2    44316.3       0.00      10.29      10.29      10.29
 HCFC-22          1970.0    56071.0   -93616.1    43690.6      12.12     2802.1    50577.7    56071.0    61564.5   789886.9 -1634101.4   -97774.7  1470435.0     2820.3    38268.9    43647.0    49348.8       0.00      12.12      12.12      12.12
 HCFC-22          1971.0    60582.0   -81235.7    47788.5      14.10     3027.5    54646.8    60582.0    66517.4   786155.8 -1614696.5   -85403.1  1475445.1     3220.7    41596.1    47741.1    54243.8       0.00      14.10      14.10      14.10
 HCFC-22          1972.0    63250.0   -68442.2    54839.4      16.19     3160.8    57053.4    63250.0    69446.8   781974.7 -1593801.8   -72526.6  1480178.4     3697.8    47729.7    54784.9    62251.0       0.00      16.19      16.19      16.19
 HCFC-22          1973.0    74346.0   -60031.6    61967.4      18.59     3715.3    67062.3    74346.0    81630.0   777336.2 -1576136.1   -64115.8  1479077.3     4226.8    53839.7    61906.8    70434.1       0.00      18.59      18.59      18.59
 HCFC-22          1974.0    83390.0   -47653.1    62598.4      21.28     4167.3    75220.3    83390.0    91560.0   771982.5 -1553389.6   -51792.1  1480855.0     4683.4    53576.4    62536.8    71963.2       0.00      21.28      21.28      21.28
 HCFC-22          1975.0    74989.0   -26861.4    70549.6      23.79     3747.5    67642.3    74989.0    82336.0   766005.9 -1521105.0   -31070.0  1489822.5     5247.0    60441.4    70480.5    81044.3       0.00      23.79      23.79      23.79
 HCFC-22          1976.0    90706.0   -22422.0    78579.7      26.65     4532.9    81819.6    90706.0    99592.8   759778.2 -1504738.0   -26571.4  1481705.4     5868.0    67275.2    78502.8    90312.8       0.00      26.65      26.65      26.65
 HCFC-22          1977.0   101375.0   -10295.6    85865.9      29.81     5066.1    91443.3   101375.0   111307.1   752645.3 -1479117.1   -14226.3  1479623.1     6528.0    73291.1    85779.9    98921.6       0.00      29.81      29.81      29.81
 HCFC-22          1978.0   111662.0     5213.5   115806.8      33.21     5580.1   100722.5   111662.0   122601.9   744699.4 -1448101.0     1489.3  1479032.5     7649.0   101108.8   115690.9   131142.0       0.00      33.21      33.21      33.21
 HCFC-22          1979.0   117892.0     1068.7   106959.7      38.36     5891.5   106342.1   117892.0   129442.3   735636.8 -1434686.9    -2458.5  1456806.3     8337.4    90892.6   106852.5   123627.1       0.00      38.36      38.36      38.36
 HCFC-22          1980.0   126323.0    12001.0   111438.0      42.50     6312.8   113947.2   126323.0   138699.3   725786.3 -1404652.8     8455.4  1447701.5     9114.6    93879.3   111330.5   129641.3       0.00      42.50      42.50      42.50
 HCFC-22          1981.0   130811.0    26885.9   116447.3      46.60     6537.1   117995.5   130811.0   143627.0   715076.2 -1369271.4    23516.5  1440907.3     9898.7    97362.4   116335.7   136190.9       0.00      46.60      46.60      46.60
 HCFC-22          1982.0   123616.0    41249.6   120568.8      50.72     6177.5   111505.4   123616.0   135727.1   703603.9 -1332476.1    37836.8  1432176.6    10671.6    99993.0   120453.5   141847.8       0.00      50.72      50.72      50.72
 HCFC-22          1983.0   143881.0    44296.8   124057.7      54.79     7190.2   129785.0   143881.1   157977.5   691668.6 -1306588.3    41116.6  1412057.8    11427.6   102021.2   123939.0   146829.3       0.00      54.79      54.79      54.79
 HCFC-22          1984.0   152356.0    64120.2   128659.8      58.77     7613.7   137429.7   152356.1   167282.9   678610.7 -1261005.1    60855.7  1406128.1    12187.4   105151.2   128529.7   152929.2       0.00      58.77      58.77      58.77
 HCFC-22          1985.0   153432.0    87816.4   136712.6      62.74     7667.5   138400.3   153432.1   168464.3   664724.5 -1210511.1    84694.9  1402181.3    13000.5   111635.3   136574.6   162599.9       0.00      62.74      62.74      62.74
 HCFC-22          1986.0   164993.0   104535.8   146783.5      66.93     8245.3   148828.7   164993.1   181158.0   650154.9 -1165578.8   101670.9  1389903.1    13884.2   120002.7   146634.2   174429.4       0.00      66.93      66.93      66.93
 HCFC-22          1987.0   173304.0   122745.3   161857.2      71.47     8660.6   156325.5   173304.1   190283.2   634592.4 -1117293.0   120007.8  1376867.4    14906.5   133113.4   161702.6   191561.5       0.00      71.47      71.47      71.47
 HCFC-22          1988.0   203545.0   134192.1   177557.6      76.66    10171.8   183603.8   203545.1   223487.1   618013.8 -1073491.5   131458.8  1355125.4    16052.3   146602.9   177393.3   209553.1       0.00      76.66      76.66      76.66
 HCFC-22          1989.0   241062.0   160179.5   183181.3      82.49    12046.7   217445.2   241062.1   264679.8   599791.2 -1012335.2   157587.7  1344693.8    17147.8   150098.7   183000.3   217344.2       0.00      82.49      82.49      82.49
 HCFC-22          1990.0   225815.2   218060.2   185481.2      88.24    11284.7   203692.1   225815.3   247939.1   579793.3  -914366.5   215439.2  1363230.4    18178.9   150395.3   185295.9   221646.1       0.00      88.24      88.24      88.24
 HCFC-22          1991.0   210568.3   258394.2   191005.9      93.68    10522.8   189939.0   210568.4   231198.5   559367.0  -833632.0   255948.2  1363111.8    19209.5   153932.5   190813.7   229184.8       0.00      93.68      93.68      93.68
 HCFC-22          1992.0   195321.5   277956.6   189737.5      99.05     9760.9   176185.9   195321.6   214457.9   538526.4  -773843.3   275734.5  1341732.9    20129.3   150862.6   189541.1   229740.1       0.00      99.05      99.05      99.05
 HCFC-22          1993.0   275327.3   283540.6   201125.1     103.92    13759.0   248353.6   275327.4   302302.2   517377.8  -726608.1   281615.5  1305611.9    21148.1   160286.4   200920.1   243164.0       0.00     103.92     103.92     103.92
 HCFC-22          1994.0   262341.6   357742.9   196098.8     109.16    13110.1   236640.1   262341.7   288044.2   493584.7  -605836.9   355961.4  1332589.3    21993.7   153589.5   195890.9   239736.1       0.00     109.16     109.16     109.16
 HCFC-22          1995.0   328056.1   423985.7   220402.4     113.64    16394.1   295916.5   328056.3   360197.0   469553.2  -492297.3   422416.8  1351025.5    23133.8   175731.5   220175.8   266387.3       0.00     113.64     113.64     113.64
 HCFC-22          1996.0   273566.1   531639.4   212830.3     119.40    13671.0   246764.9   273566.2   300368.4   443238.6  -333316.7   530309.8  1405923.3    24034.1   166369.8   212600.5   260515.2       0.00     119.40     119.40     119.40
 HCFC-22          1997.0   264540.7   592375.3   214074.1     124.19    13220.0   238623.7   264540.8   290458.7   417706.7  -222504.6   591404.0  1415864.0    24895.3   165959.2   213842.4   263435.4       0.00     124.19     124.19     124.19
 HCFC-22          1998.0   289108.5   642841.9   241334.5     128.69    14447.7   260784.6   289108.6   317433.5   391981.2  -122199.1   642149.1  1415188.6    26075.2   190968.6   241080.6   293133.0       0.00     128.69     128.69     128.69
 HCFC-22          1999.0   321431.8   690615.8   231219.3     134.66    16063.0   289941.2   321431.9   352923.7   365139.3   -21927.5   689906.4  1409389.5    26979.9   179080.1   230968.8   284705.6       0.00     134.66     134.66     134.66
 HCFC-22          2000.0   341748.6   780828.3   242720.6     139.47    17078.3   308267.6   341748.8   375231.0   337371.6   121609.1   779838.8  1445046.6    27989.3   188622.1   242461.5   298225.4       0.00     139.47     139.47     139.47
 HCFC-22          2001.0   321925.3   879856.3   264662.7     144.67    16087.7   290386.4   321925.4   353465.5   309097.1   275560.8   879242.0  1487762.3    29217.0   208218.9   264379.4   322650.1       0.00     144.67     144.67     144.67
 HCFC-22          2002.0   319464.7   937119.0   246047.3     150.93    15964.7   288166.8   319464.8   350763.8   281326.3   387021.4   936616.4  1489667.6    30059.0   187954.0   245792.1   305625.5       0.00     150.93     150.93     150.93
 HCFC-22          2003.0   334848.7  1010536.4   257004.4     155.44    16733.5   302043.7   334848.9   367655.1   254363.3   512683.2  1010105.6  1509808.4    31006.4   197082.6   256734.4   318456.3       0.00     155.44     155.44     155.44
 HCFC-22          2004.0   370902.3  1088380.7   267542.7     160.32    18535.2   334565.1   370902.4   407241.0   228401.1   641621.3  1087904.5  1535584.9    32015.0   205656.1   267263.2   330989.4       0.00     160.32     160.32     160.32
 HCFC-22          2005.0   432062.1  1191740.3   295576.6     165.53    21591.6   389733.0   432062.2   474392.8   204066.9   792028.8  1191325.1  1591059.5    33326.4   231156.3   295258.6   361693.3       0.00     165.53     165.53     165.53
 HCFC-22          2006.0   430268.7  1328225.8   309450.2     172.21    21502.0   388115.4   430268.9   472423.8   182647.5   969769.6  1327828.3  1685557.6    34698.7   242386.6   309122.2   378297.8       0.00     172.21     172.21     172.21
 HCFC-22          2007.0   501387.4  1449044.3   332366.7     179.29    25056.0   452266.6   501387.6   550510.1   167658.3  1119847.3  1449035.9  1777180.5    36271.9   262322.1   332012.1   404411.7       0.00     179.29     179.29     179.29
 HCFC-22          2008.0   448030.0  1618065.0   339022.8     187.34    22389.6   404136.6   448030.2   491925.2   161720.4  1301024.0  1618066.6  1935127.6    37782.3   266020.3   338661.9   413997.3       0.00     187.34     187.34     187.34
 HCFC-22          2009.0   523630.4  1727072.2   449823.1     195.20    26167.6   472330.5   523630.6   574932.4   167444.3  1398232.0  1726988.0  2056026.5   100084.7   329626.4   436945.7   639756.9       0.00     195.20     195.20     195.20
 HCFC-22          2010.0   506851.6  1800879.5   457035.9     209.97    25329.1   457195.5   506851.8   556509.8   206707.5  1396596.8  1806921.4  2179318.0    67568.2   351150.5   450197.5   608666.3       8.02     199.68     208.88     226.16
 HCFC-22          2011.0   535885.0  1850695.2   470596.6     224.08    26780.0   483384.5   535885.2   588387.6   244062.7  1362330.4  1860712.9  2287092.0    58147.4   373152.5   466602.8   596844.3      13.16     205.14     222.36     253.14
 HCFC-22          2012.0   564918.5  1915983.6   487802.3     238.03    28230.9   509573.6   564918.7   620265.7   278996.7  1350585.3  1928303.3  2409270.3    53287.2   395643.2   485412.8   598770.3      17.51     211.57     235.86     277.68
 HCFC-22          2013.0   492334.9  1993099.7   487123.8     252.05    24603.6   444100.9   492335.1   540570.8   311755.8  1359674.8  2006028.8  2542580.5    46429.9   404658.7   486363.8   577030.5      21.36     218.87     249.55     300.74
 HCFC-22          2014.0   492334.9  1998310.8   486991.7     264.94    24603.6   444100.9   492335.1   540570.8   338920.6  1311239.8  2010542.8  2597011.8    41812.3   411993.4   487125.2   563790.9      24.58     225.97     262.24     320.95
 HCFC-22          2015.0   398227.4  2003653.9   468110.2     276.82    19900.8   359213.1   398227.5   437243.2   361973.7  1277414.9  2014327.4  2644943.8    35174.4   404947.0   469072.9   528807.1      27.38     232.83     273.96     339.09
 HCFC-22          2016.0   398227.4  1933771.1   453462.8     286.51    19900.8   359213.1   398227.5   437243.2   378253.7  1185800.0  1941819.8  2605852.0    31068.6   398466.8   454546.3   505368.4      29.61     238.30     283.55     353.62
 HCFC-22          2017.0   398227.4  1878535.6   441991.6     294.46    19900.8   359213.1   398227.5   437243.2   390199.8  1121275.0  1883423.6  2573459.3    28474.9   392557.3   442984.4   488869.0      31.53     242.57     291.47     365.52
 HCFC-22          2018.0   398227.4  1834771.3   432969.6     301.03    19900.8   359213.1   398227.5   437243.2   399433.0  1075422.3  1836365.5  2546522.0    26807.0   387361.1   433790.9   476785.0      33.25     245.95     298.01     375.53
 HCFC-22          2019.0   398227.4  1800029.1   425850.3     306.49    19900.8   359213.1   398227.5   437243.2   407025.5  1043604.3  1798490.5  2523562.5    25714.6   382774.8   426598.3   467663.3      34.83     248.50     303.42     384.19
 HCFC-22          2020.0   263476.4  1772406.1   392974.3     311.06    13166.8   237663.7   263476.5   289290.2   413698.3  1021063.4  1767938.8  2504011.0    22911.3   355869.3   393635.4   429511.6      36.32     250.39     307.91     391.74
 HCFC-22          2021.0   263476.4  1642908.2   367111.4     313.06    13166.8   237663.7   263476.5   289290.2   415086.5   907405.9  1635326.0  2372914.8    21448.1   332153.0   367741.7   401324.6      37.44     250.29     309.89     395.83
 HCFC-22          2022.0   263476.4  1539273.3   346607.0     313.18    13166.8   237663.7   263476.5   289290.2   413535.8   827973.1  1528584.1  2260379.3    20457.0   312856.2   347198.0   379642.7      38.39     248.57     309.96     397.74
 HCFC-22          2023.0   263476.4  1456142.7   330293.2     311.93    13166.8   237663.7   263476.5   289290.2   410739.7   772307.8  1442568.0  2163466.8    19600.5   297862.8   330812.3   362323.7      39.24     245.79     308.66     398.07
 HCFC-22          2024.0   263476.4  1389326.0   317277.0     309.69    13166.8   237663.7   263476.5   289290.2   407722.4   732989.7  1373298.0  2080551.5    18797.7   286482.8   317671.6   348309.8      40.03     242.22     306.36     397.37
 HCFC-22          2025.0   132635.7  1335525.4   280414.4     306.77     6628.3   119641.4   132635.7   145630.5   405092.8   705508.9  1317448.3  2009759.0    19926.5   245171.1   281304.1   312950.6      40.76     238.14     303.38     396.02
 HCFC-22          2026.0   132635.7  1187746.7   251296.2     301.61     6628.3   119641.4   132635.7   145630.5   398985.1   591276.4  1167373.3  1838219.0    20162.9   213514.0   252269.3   285049.7      41.24     232.15     298.21     391.89
 HCFC-22          2027.0   132635.7  1069086.1   228133.9     294.90     6628.3   119641.4   132635.7   145630.5   391277.2   510971.1  1046669.1  1691507.3    19706.6   190522.9   228937.5   262188.1      41.58     224.80     291.46     385.82
 HCFC-22          2028.0   132635.7   973588.0   209648.0     287.18     6628.3   119641.4   132635.7   145630.5   383383.0   454705.7   949391.9  1565126.8    18759.9   174064.8   210176.0   243130.3      41.84     216.74     283.68     378.61
 HCFC-22          2029.0   132635.7   896575.7   194854.8     278.84     6628.3   119641.4   132635.7   145630.5   376095.2   415299.1   871099.7  1457040.0    17531.3   162324.7   195052.5   227066.4      42.02     208.26     275.22     370.86
 HCFC-22          2030.0    10064.7   834356.6   158208.9     270.17      503.0     9078.6    10064.7    11050.7   369824.0   387676.3   808074.3  1363705.6    20578.0   117758.5   158994.2   194844.5      42.14     199.55     266.48     362.72
 HCFC-22          2031.0    10064.7   686212.4   129210.6     259.73      503.0     9078.6    10064.7    11050.7   361465.0   279198.6   658940.4  1180436.3    21385.7    85767.4   130010.7   167988.2      42.06     189.36     255.92     352.33
 HCFC-22          2032.0    10064.7   567066.4   106109.4     248.17      503.0     9078.6    10064.7    11050.7   352428.2   203233.6   538870.1  1023083.6    21025.5    63209.6   106661.4   145342.6      41.86     178.31     244.34     340.47
 HCFC-22          2033.0    10064.7   471021.7    87646.5     235.97      503.0     9078.6    10064.7    11050.7   343772.8   149792.3   442000.8   887531.5    19972.0    47375.8    87863.0   126021.6      41.56     166.87     232.11     327.91
 HCFC-22          2034.0    10064.7   393439.9    72851.7     223.51      503.0     9078.6    10064.7    11050.7   336029.9   112367.6   364070.7   771397.8    18537.5    36291.7    72714.4   109523.0      41.18     155.35     219.57     315.00
 HCFC-22          2035.0    10064.7   330653.0    60968.7     211.03      503.0     9078.6    10064.7    11050.7   329410.8    86134.5   301336.8   671323.3    16926.6    28524.7    60513.8    95411.5      40.72     143.95     206.97     301.96
 HCFC-22          2036.0    10064.7   279748.9    51404.2     198.75      503.0     9078.6    10064.7    11050.7   323936.8    67750.5   250803.0   585374.4    15271.3    23090.0    50690.5    83321.8      40.18     132.91     194.59     288.92
 HCFC-22          2037.0    10064.7   238409.4    43690.7     186.80      503.0     9078.6    10064.7    11050.7   319525.4    54829.9   210116.9   511656.4    13654.1    19303.6    42782.8    72956.9      39.56     122.40     182.55     275.99
 HCFC-22          2038.0    10064.7   204783.3    37458.6     175.28      503.0     9078.6    10064.7    11050.7   316045.1    45756.8   177303.4   448321.3    12124.1    16630.7    36412.7    64071.0      38.86     112.45     170.92     263.32
 HCFC-22          2039.0    10064.7   177389.4    32414.4     164.25      503.0     9078.6    10064.7    11050.7   313350.0    39411.9   150884.8   393834.9    10708.3    14778.9    31280.0    56410.4      38.09     103.10     159.81     250.96
 HCFC-22          2040.0        0.0   155039.7    26290.3     153.75        0.0        0.0        0.0        0.0   311298.9    34971.8   129617.5   346776.8     9825.9    10339.3    25188.9    48483.9      37.26      94.42     149.25     239.05
 HCFC-22          2041.0        0.0   128749.4    21371.8     143.67        0.0        0.0        0.0        0.0   309619.4    24519.9   104398.8   298153.3     8881.2     7232.1    20282.8    41644.2      36.37      86.23     139.10     227.34
 HCFC-22          2042.0        0.0   107377.6    17405.3     134.05        0.0        0.0        0.0        0.0   308266.9    17199.6    84102.0   256174.7     7953.4     5056.3    16334.7    35764.2      35.44      78.58     129.42     216.05
 HCFC-22          2043.0        0.0    89972.3    14198.9     124.92        0.0        0.0        0.0        0.0   307194.2    12040.5    67734.3   220220.8     7076.0     3535.4    13157.5    30721.1      34.46      71.44     120.26     205.11
 HCFC-22          2044.0        0.0    75773.5    11601.7     116.30        0.0        0.0        0.0        0.0   306351.5     8450.5    54559.3   189396.0     6265.7     2470.7    10596.3    26387.9      33.46      64.85     111.62     194.56
 HCFC-22          2045.0        0.0    64171.8     9494.1     108.17        0.0        0.0        0.0        0.0   305692.7     5924.7    43946.1   162828.5     5529.4     1727.4     8533.9    22666.1      32.43      58.80     103.49     184.44
 HCFC-22          2046.0        0.0    54677.7     7780.8     100.54        0.0        0.0        0.0        0.0   305178.1     4149.4    35397.1   139994.3     4868.5     1207.9     6873.3    19475.5      31.39      53.25      95.84     174.76
 HCFC-22          2047.0        0.0    46896.9     6385.7      93.40        0.0        0.0        0.0        0.0   304774.9     2909.2    28511.7   120398.1     4280.5      845.0     5535.9    16734.6      30.33      48.17      88.70     165.49
 HCFC-22          2048.0        0.0    40511.2     5248.0      86.71        0.0        0.0        0.0        0.0   304457.0     2037.6    22961.9   103503.3     3761.2      590.9     4458.9    14371.8      29.27      43.54      82.04     156.64
 HCFC-22          2049.0        0.0    35263.2     4318.9      80.47        0.0        0.0        0.0        0.0   304203.7     1429.3    18493.6    88987.3     3305.1      413.1     3590.4    12348.8      28.22      39.32      75.83     148.20
 HCFC-22          2050.0        0.0    30944.3     3558.9      74.66        0.0        0.0        0.0        0.0   303999.1     1001.5    14896.6    76541.0     2906.7      288.8     2891.6    10613.7      27.17      35.47      70.06     140.20
 HCFC-22          2051.0        0.0    27385.4     2936.4      69.25        0.0        0.0        0.0        0.0   303830.9      702.8    11997.2    65798.2     2559.9      202.0     2329.2     9117.8      26.13      31.99      64.69     132.59
 HCFC-22          2052.0        0.0    24449.0     2426.0      64.21        0.0        0.0        0.0        0.0   303690.2      492.2     9662.0    56583.4     2259.2      141.2     1875.5     7831.7      25.11      28.83      59.71     125.34
 HCFC-22          2053.0        0.0    22023.1     2006.7      59.53        0.0        0.0        0.0        0.0   303569.9      344.6     7782.7    48625.5     1999.2       98.7     1510.7     6731.1      24.10      25.98      55.10     118.48
 HCFC-22          2054.0        0.0    20016.3     1662.0      55.18        0.0        0.0        0.0        0.0   303465.1      241.8     6269.3    41810.9     1775.2       69.0     1216.6     5782.5      23.12      23.39      50.83     111.98
 HCFC-22          2055.0        0.0    18354.3     1378.2      51.15        0.0        0.0        0.0        0.0   303372.0      169.4     5049.5    35942.9     1582.6       48.3      979.7     4969.3      22.16      21.06      46.88     105.83
 HCFC-22          2056.0        0.0    16976.0     1144.3      47.41        0.0        0.0        0.0        0.0   303287.8      118.9     4066.4    30900.0     1417.4       33.7      788.9     4269.3      21.22      18.97      43.22      99.98
 HCFC-22          2057.0        0.0    15831.7      951.3      43.94        0.0        0.0        0.0        0.0   303210.5       83.4     3275.2    26555.3     1276.0       23.6      635.3     3669.1      20.31      17.06      39.84      94.45
 HCFC-22          2058.0        0.0    14880.4      791.8      40.72        0.0        0.0        0.0        0.0   303138.7       58.4     2637.6    22829.5     1155.1       16.5      511.7     3155.2      19.43      15.35      36.72      89.22
 HCFC-22          2059.0        0.0    14088.6      659.9      37.74        0.0        0.0        0.0        0.0   303071.2       40.9     2124.5    19623.1     1051.9       11.5      412.1     2711.4      18.58      13.81      33.83      84.29
 HCFC-22          2060.0        0.0    13428.7      550.6      34.98        0.0        0.0        0.0        0.0   303007.4       28.7     1711.1    16870.7      963.7        8.1      331.9     2329.7      17.75      12.41      31.17      79.61
 HCFC-22          2061.0        0.0    12878.1      460.1      32.42        0.0        0.0        0.0        0.0   302946.6       20.1     1378.1    14501.8      888.3        5.6      267.3     2002.5      16.95      11.16      28.71      75.19
 HCFC-22          2062.0        0.0    12418.0      384.9      30.06        0.0        0.0        0.0        0.0   302888.4       14.1     1109.9    12461.0      823.7        3.9      215.3     1720.4      16.19      10.03      26.44      71.02
 HCFC-22          2063.0        0.0    12033.1      322.5      27.86        0.0        0.0        0.0        0.0   302832.5        9.9      894.2    10711.5      768.3        2.8      173.4     1477.4      15.45       9.02      24.35      67.05
 HCFC-22          2064.0        0.0    11710.6      270.5      25.83        0.0        0.0        0.0        0.0   302778.8        6.9      720.3     9211.9      720.5        1.9      139.6     1269.6      14.73       8.10      22.43      63.30
 HCFC-22          2065.0        0.0    11440.1      227.3      23.95        0.0        0.0        0.0        0.0   302727.0        4.9      580.1     7923.8      679.1        1.3      112.4     1091.0      14.05       7.28      20.65      59.77
 HCFC-22          2066.0        0.0    11212.8      191.2      22.21        0.0        0.0        0.0        0.0   302676.9        3.4      467.2     6813.4      643.0        0.9       90.5      937.6      13.40       6.53      19.02      56.42
 HCFC-22          2067.0        0.0    11021.5      161.2      20.59        0.0        0.0        0.0        0.0   302628.6        2.4      376.3     5856.9      611.4        0.7       72.9      805.9      12.77       5.87      17.51      53.27
 HCFC-22          2068.0        0.0    10860.4      136.0      19.10        0.0        0.0        0.0        0.0   302581.9        1.7      303.1     5037.0      583.4        0.5       58.7      692.6      12.17       5.27      16.12      50.32
 HCFC-22          2069.0        0.0    10724.3      115.0      17.72        0.0        0.0        0.0        0.0   302536.6        1.2      244.1     4332.4      558.4        0.3       47.3      595.5      11.59       4.73      14.84      47.49
 HCFC-22          2070.0        0.0    10609.3       97.5      16.44        0.0        0.0        0.0        0.0   302492.9        0.8      196.6     3724.2      536.1        0.2       38.1      511.6      11.04       4.24      13.66      44.83
 HCFC-22          2071.0        0.0    10511.8       82.7      15.25        0.0        0.0        0.0        0.0   302450.5        0.6      158.3     3202.2      515.8        0.2       30.7      439.6      10.51       3.81      12.57      42.33
 HCFC-22          2072.0        0.0    10429.1       70.4      14.15        0.0        0.0        0.0        0.0   302409.5        0.4      127.5     2753.2      497.4        0.1       24.7      377.9      10.01       3.42      11.58      39.97
 HCFC-22          2073.0        0.0    10358.7       60.0      13.13        0.0        0.0        0.0        0.0   302369.7        0.3      102.7     2367.3      480.5        0.1       19.9      324.7       9.53       3.07      10.65      37.72
 HCFC-22          2074.0        0.0    10298.8       51.2      12.19        0.0        0.0        0.0        0.0   302331.2        0.2       82.7     2034.5      465.0        0.1       16.0      279.2       9.07       2.75       9.81      35.62
 HCFC-22          2075.0        0.0    10247.5       43.9      11.32        0.0        0.0        0.0        0.0   302293.8        0.1       66.6     1750.6      450.5        0.0       12.9      239.9       8.64       2.47       9.02      33.62
 HCFC-22          2076.0        0.0    10203.6       37.7      10.51        0.0        0.0        0.0        0.0   302257.7        0.1       53.7     1504.7      437.0        0.0       10.4      206.2       8.22       2.22       8.30      31.75
 HCFC-22          2077.0        0.0    10165.9       32.5       9.76        0.0        0.0        0.0        0.0   302222.6        0.1       43.2     1292.9      424.4        0.0        8.4      177.1       7.82       1.99       7.64      29.98
 HCFC-22          2078.0        0.0    10133.4       28.1       9.06        0.0        0.0        0.0        0.0   302188.5        0.0       34.8     1111.7      412.5        0.0        6.7      152.2       7.45       1.78       7.03      28.30
 HCFC-22          2079.0        0.0    10105.4       24.3       8.42        0.0        0.0        0.0        0.0   302155.5        0.0       28.0      955.8      401.4        0.0        5.4      130.8       7.09       1.60       6.47      26.71
 HCFC-22          2080.0        0.0    10081.1       21.1       7.82        0.0        0.0        0.0        0.0   302123.4        0.0       22.6      822.2      390.8        0.0        4.4      112.4       6.74       1.44       5.96      25.22
 HCFC-22          2081.0        0.0    10059.9       18.5       7.27        0.0        0.0        0.0        0.0   302092.3        0.0       18.2      707.1      380.7        0.0        3.5       96.6       6.42       1.29       5.48      23.81
 HCFC-22          2082.0        0.0    10041.5       16.2       6.76        0.0        0.0        0.0        0.0   302062.0        0.0       14.6      608.2      371.2        0.0        2.8       83.0       6.11       1.16       5.05      22.49
 HCFC-22          2083.0        0.0    10025.3       14.2       6.28        0.0        0.0        0.0        0.0   302032.6        0.0       11.8      523.1      362.1        0.0        2.3       71.3       5.81       1.04       4.64      21.23
 HCFC-22          2084.0        0.0    10011.1       12.6       5.84        0.0        0.0        0.0        0.0   302004.1        0.0        9.5      449.9      353.4        0.0        1.8       61.3       5.53       0.93       4.27      20.04
 HCFC-22          2085.0        0.0     9998.5       11.2       5.43        0.0        0.0        0.0        0.0   301976.3        0.0        7.7      386.6      345.1        0.0        1.5       52.6       5.27       0.83       3.93      18.92
 HCFC-22          2086.0        0.0     9987.3        9.9       5.05        0.0        0.0        0.0        0.0   301949.3        0.0        6.2      332.5      337.2        0.0        1.2       45.2       5.01       0.75       3.62      17.86
 HCFC-22          2087.0        0.0     9977.4        8.9       4.70        0.0        0.0        0.0        0.0   301923.0        0.0        5.0      285.9      329.6        0.0        1.0       38.9       4.77       0.67       3.33      16.86
 HCFC-22          2088.0        0.0     9968.5        8.0       4.37        0.0        0.0        0.0        0.0   301897.4        0.0        4.0      245.8      322.3        0.0        0.8       33.4       4.54       0.60       3.06      15.92
 HCFC-22          2089.0        0.0     9960.5        7.2       4.07        0.0        0.0        0.0        0.0   301872.5        0.0        3.2      211.5      315.3        0.0        0.6       28.7       4.32       0.54       2.82      15.03
 HCFC-22          2090.0        0.0     9953.2        6.6       3.79        0.0        0.0        0.0        0.0   301848.3        0.0        2.6      181.8      308.6        0.0        0.5       24.7       4.12       0.48       2.59      14.19
 HCFC-22          2091.0        0.0     9946.6        6.0       3.52        0.0        0.0        0.0        0.0   301824.6        0.0        2.1      156.3      302.1        0.0        0.4       21.2       3.92       0.43       2.39      13.40
 HCFC-22          2092.0        0.0     9940.6        5.5       3.28        0.0        0.0        0.0        0.0   301801.6        0.0        1.7      134.4      295.9        0.0        0.3       18.2       3.74       0.39       2.20      12.65
 HCFC-22          2093.0        0.0     9935.1        5.1       3.05        0.0        0.0        0.0        0.0   301779.1        0.0        1.4      115.5      289.9        0.0        0.3       15.7       3.56       0.35       2.02      11.94
 HCFC-22          2094.0        0.0     9930.0        4.7       2.85        0.0        0.0        0.0        0.0   301757.2        0.0        1.1       99.3      284.1        0.0        0.2       13.5       3.39       0.31       1.86      11.27
 HCFC-22          2095.0        0.0     9925.3        4.4       2.65        0.0        0.0        0.0        0.0   301735.8        0.0        0.9       85.4      278.6        0.0        0.2       11.6       3.23       0.28       1.71      10.64
 HCFC-22          2096.0        0.0     9921.0        4.1       2.47        0.0        0.0        0.0        0.0   301714.9        0.0        0.7       73.4      273.2        0.0        0.1        9.9       3.08       0.25       1.57      10.05
 HCFC-22          2097.0        0.0     9916.9        3.8       2.30        0.0        0.0        0.0        0.0   301694.5        0.0        0.6       63.1      268.0        0.0        0.1        8.5       2.94       0.23       1.45       9.49
 HCFC-22          2098.0        0.0     9913.1        3.6       2.14        0.0        0.0        0.0        0.0   301674.6        0.0        0.5       54.3      263.0        0.0        0.1        7.3       2.80       0.20       1.33       8.96
 HCFC-22          2099.0        0.0     9909.5        3.4       2.00        0.0        0.0        0.0        0.0   301655.2        0.0        0.4       46.7      258.2        0.0        0.1        6.3       2.67       0.18       1.23       8.46
 HCFC-22          2100.0        0.0     9906.1        3.2       1.86        0.0        0.0        0.0        0.0   301636.2        0.0        0.3       40.1      253.5        0.0        0.1        5.4       2.55       0.16       1.13       7.99
 HCFC-22          2101.0        0.0     9902.9        3.1       1.74        0.0        0.0        0.0        0.0   301617.6        0.0        0.2       34.5      249.0        0.0        0.0        4.7       2.43       0.15       1.04       7.54
 HCFC-22          2102.0        0.0     9899.8        2.9       1.62        0.0        0.0        0.0        0.0   301599.4        0.0        0.2       29.7      244.6        0.0        0.0        4.0       2.32       0.13       0.95       7.11
 HCFC-22          2103.0        0.0     9896.9        2.8       1.51        0.0        0.0        0.0        0.0   301581.7        0.0        0.2       25.5      240.4        0.0        0.0        3.4       2.21       0.12       0.88       6.72
 HCFC-22          2104.0        0.0     9894.1        2.7       1.41        0.0        0.0        0.0        0.0   301564.3        0.0        0.1       21.9      236.3        0.0        0.0        3.0       2.11       0.10       0.81       6.34
 HCFC-22          2105.0        0.0     9891.5        2.6       1.32        0.0        0.0        0.0        0.0   301547.3        0.0        0.1       18.9      232.3        0.0        0.0        2.5       2.02       0.09       0.74       5.99
 HCFC-22          2106.0        0.0     9888.9        2.5       1.23        0.0        0.0        0.0        0.0   301530.6        0.0        0.1       16.2      228.4        0.0        0.0        2.2       1.93       0.08       0.68       5.65
 HCFC-22          2107.0        0.0     9886.5        2.4       1.15        0.0        0.0        0.0        0.0   301514.3        0.0        0.1       13.9      224.7        0.0        0.0        1.9       1.84       0.08       0.63       5.34
 HCFC-22          2108.0        0.0     9884.1        2.3       1.07        0.0        0.0        0.0        0.0   301498.4        0.0        0.1       12.0      221.1        0.0        0.0        1.6       1.76       0.07       0.58       5.04
 HCFC-22          2109.0        0.0     9881.8        2.2       1.00        0.0        0.0        0.0        0.0   301482.7        0.0        0.0       10.3      217.5        0.0        0.0        1.4       1.68       0.06       0.53       4.76
 HCFC-22          2110.0        0.0     9879.6        2.1       0.93        0.0        0.0        0.0        0.0   301467.4        0.0        0.0        8.9      214.1        0.0        0.0        1.2       1.61       0.05       0.49       4.50
 HCFC-22          2111.0        0.0     9877.5        2.1       0.87        0.0        0.0        0.0        0.0   301452.4        0.0        0.0        7.6      210.8        0.0        0.0        1.0       1.54       0.05       0.45       4.25
 HCFC-22          2112.0        0.0     9875.4        2.0       0.82        0.0        0.0        0.0        0.0   301437.7        0.0        0.0        6.6      207.6        0.0        0.0        0.9       1.47       0.04       0.42       4.01
 HCFC-22          2113.0        0.0     9873.4        2.0       0.76        0.0        0.0        0.0        0.0   301423.2        0.0        0.0        5.6      204.4        0.0        0.0        0.8       1.41       0.04       0.38       3.79
 HCFC-22          2114.0        0.0     9871.4        1.9       0.71        0.0        0.0        0.0        0.0   301409.1        0.0        0.0        4.8      201.4        0.0        0.0        0.7       1.35       0.04       0.35       3.58
 HCFC-22          2115.0        0.0     9869.5        1.9       0.67        0.0        0.0        0.0        0.0   301395.2        0.0        0.0        4.2      198.4        0.0        0.0        0.6       1.29       0.03       0.32       3.38
 HCFC-22          2116.0        0.0     9867.7        1.8       0.62        0.0        0.0        0.0        0.0   301381.6        0.0        0.0        3.6      195.5        0.0        0.0        0.5       1.24       0.03       0.30       3.19
 HCFC-22          2117.0        0.0     9865.9        1.8       0.58        0.0        0.0        0.0        0.0   301368.2        0.0        0.0        3.1      192.7        0.0        0.0        0.4       1.19       0.03       0.27       3.01
 HCFC-22          2118.0        0.0     9864.1        1.7       0.55        0.0        0.0        0.0        0.0   301355.1        0.0        0.0        2.7      189.9        0.0        0.0        0.4       1.14       0.02       0.25       2.84
 HCFC-22          2119.0        0.0     9862.4        1.7       0.51        0.0        0.0        0.0        0.0   301342.2        0.0        0.0        2.3      187.3        0.0        0.0        0.3       1.09       0.02       0.23       2.68
 HCFC-22          2120.0        0.0     9860.7        1.6       0.48        0.0        0.0        0.0        0.0   301329.6        0.0        0.0        2.0      184.7        0.0        0.0        0.3       1.05       0.02       0.21       2.54
 
 Species            Year  Prod_mean  Bank_mean  Emis_mean   Mix_mean  Prod_stdv  Prod_2.5p   Prod_50p Prod_97.5p  Bank_stdv  Bank_2.5p   Bank_50p Bank_97.5p  Emis_stdv  Emis_2.5p   Emis_50p Emis_97.5p   Mix_stdv   Mix_2.5p    Mix_50p  Mix_97.5p
 HCFC-141b        1950.0        0.0        0.0        0.0       0.00        0.0        0.0        0.0        0.0        0.0        0.0        0.0        0.0        0.0        0.0        0.0        0.0       0.00       0.00       0.00       0.00
 HCFC-141b        1951.0        0.0        0.0        0.0       0.00        0.0        0.0        0.0        0.0        0.0        0.0        0.0        0.0        0.0        0.0        0.0        0.0       0.00       0.00       0.00       0.00
 HCFC-141b        1952.0        0.0        0.0        0.0       0.00        0.0        0.0        0.0        0.0        0.0        0.0        0.0        0.0        0.0        0.0        0.0        0.0       0.00       0.00       0.00       0.00
 HCFC-141b        1953.0        0.0        0.0        0.0       0.00        0.0        0.0        0.0        0.0        0.0        0.0        0.0        0.0        0.0        0.0        0.0        0.0       0.00       0.00       0.00       0.00
 HCFC-141b        1954.0        0.0        0.0        0.0       0.00        0.0        0.0        0.0        0.0        0.0        0.0        0.0        0.0        0.0        0.0        0.0        0.0       0.00       0.00       0.00       0.00
 HCFC-141b        1955.0        0.0        0.0        0.0       0.00        0.0        0.0        0.0        0.0        0.0        0.0        0.0        0.0        0.0        0.0        0.0        0.0       0.00       0.00       0.00       0.00
 HCFC-141b        1956.0        0.0        0.0        0.0       0.00        0.0        0.0        0.0        0.0        0.0        0.0        0.0        0.0        0.0        0.0        0.0        0.0       0.00       0.00       0.00       0.00
 HCFC-141b        1957.0        0.0        0.0        0.0       0.00        0.0        0.0        0.0        0.0        0.0        0.0        0.0        0.0        0.0        0.0        0.0        0.0       0.00       0.00       0.00       0.00
 HCFC-141b        1958.0        0.0        0.0        0.0       0.00        0.0        0.0        0.0        0.0        0.0        0.0        0.0        0.0        0.0        0.0        0.0        0.0       0.00       0.00       0.00       0.00
 HCFC-141b        1959.0        0.0        0.0        0.0       0.00        0.0        0.0        0.0        0.0        0.0        0.0        0.0        0.0        0.0        0.0        0.0        0.0       0.00       0.00       0.00       0.00
 HCFC-141b        1960.0        0.0        0.0        0.0       0.00        0.0        0.0        0.0        0.0        0.0        0.0        0.0        0.0        0.0        0.0        0.0        0.0       0.00       0.00       0.00       0.00
 HCFC-141b        1961.0        0.0        0.0        0.0       0.00        0.0        0.0        0.0        0.0        0.0        0.0        0.0        0.0        0.0        0.0        0.0        0.0       0.00       0.00       0.00       0.00
 HCFC-141b        1962.0        0.0        0.0        0.0       0.00        0.0        0.0        0.0        0.0        0.0        0.0        0.0        0.0        0.0        0.0        0.0        0.0       0.00       0.00       0.00       0.00
 HCFC-141b        1963.0        0.0        0.0        0.0       0.00        0.0        0.0        0.0        0.0        0.0        0.0        0.0        0.0        0.0        0.0        0.0        0.0       0.00       0.00       0.00       0.00
 HCFC-141b        1964.0        0.0        0.0        0.0       0.00        0.0        0.0        0.0        0.0        0.0        0.0        0.0        0.0        0.0        0.0        0.0        0.0       0.00       0.00       0.00       0.00
 HCFC-141b        1965.0        0.0        0.0        0.0       0.00        0.0        0.0        0.0        0.0        0.0        0.0        0.0        0.0        0.0        0.0        0.0        0.0       0.00       0.00       0.00       0.00
 HCFC-141b        1966.0        0.0        0.0        0.0       0.00        0.0        0.0        0.0        0.0        0.0        0.0        0.0        0.0        0.0        0.0        0.0        0.0       0.00       0.00       0.00       0.00
 HCFC-141b        1967.0        0.0        0.0        0.0       0.00        0.0        0.0        0.0        0.0        0.0        0.0        0.0        0.0        0.0        0.0        0.0        0.0       0.00       0.00       0.00       0.00
 HCFC-141b        1968.0        0.0        0.0        0.0       0.00        0.0        0.0        0.0        0.0        0.0        0.0        0.0        0.0        0.0        0.0        0.0        0.0       0.00       0.00       0.00       0.00
 HCFC-141b        1969.0        0.0        0.0        0.0       0.00        0.0        0.0        0.0        0.0        0.0        0.0        0.0        0.0        0.0        0.0        0.0        0.0       0.00       0.00       0.00       0.00
 HCFC-141b        1970.0        0.0        0.0        0.0       0.00        0.0        0.0        0.0        0.0        0.0        0.0        0.0        0.0        0.0        0.0        0.0        0.0       0.00       0.00       0.00       0.00
 HCFC-141b        1971.0        0.0        0.0        0.0       0.00        0.0        0.0        0.0        0.0        0.0        0.0        0.0        0.0        0.0        0.0        0.0        0.0       0.00       0.00       0.00       0.00
 HCFC-141b        1972.0        0.0        0.0        0.0       0.00        0.0        0.0        0.0        0.0        0.0        0.0        0.0        0.0        0.0        0.0        0.0        0.0       0.00       0.00       0.00       0.00
 HCFC-141b        1973.0        0.0        0.0        0.0       0.00        0.0        0.0        0.0        0.0        0.0        0.0        0.0        0.0        0.0        0.0        0.0        0.0       0.00       0.00       0.00       0.00
 HCFC-141b        1974.0        0.0        0.0        0.0       0.00        0.0        0.0        0.0        0.0        0.0        0.0        0.0        0.0        0.0        0.0        0.0        0.0       0.00       0.00       0.00       0.00
 HCFC-141b        1975.0        0.0        0.0        0.0       0.00        0.0        0.0        0.0        0.0        0.0        0.0        0.0        0.0        0.0        0.0        0.0        0.0       0.00       0.00       0.00       0.00
 HCFC-141b        1976.0        0.0        0.0        0.0       0.00        0.0        0.0        0.0        0.0        0.0        0.0        0.0        0.0        0.0        0.0        0.0        0.0       0.00       0.00       0.00       0.00
 HCFC-141b        1977.0        0.0        0.0        0.0       0.00        0.0        0.0        0.0        0.0        0.0        0.0        0.0        0.0        0.0        0.0        0.0        0.0       0.00       0.00       0.00       0.00
 HCFC-141b        1978.0        0.0        0.0        0.0       0.00        0.0        0.0        0.0        0.0        0.0        0.0        0.0        0.0        0.0        0.0        0.0        0.0       0.00       0.00       0.00       0.00
 HCFC-141b        1979.0        0.0        0.0        0.0       0.00        0.0        0.0        0.0        0.0        0.0        0.0        0.0        0.0        0.0        0.0        0.0        0.0       0.00       0.00       0.00       0.00
 HCFC-141b        1980.0        0.0        0.0        0.0       0.00        0.0        0.0        0.0        0.0        0.0        0.0        0.0        0.0        0.0        0.0        0.0        0.0       0.00       0.00       0.00       0.00
 HCFC-141b        1981.0        0.0        0.0        0.0       0.00        0.0        0.0        0.0        0.0        0.0        0.0        0.0        0.0        0.0        0.0        0.0        0.0       0.00       0.00       0.00       0.00
 HCFC-141b        1982.0        0.0        0.0        0.0       0.00        0.0        0.0        0.0        0.0        0.0        0.0        0.0        0.0        0.0        0.0        0.0        0.0       0.00       0.00       0.00       0.00
 HCFC-141b        1983.0        0.0        0.0        0.0       0.00        0.0        0.0        0.0        0.0        0.0        0.0        0.0        0.0        0.0        0.0        0.0        0.0       0.00       0.00       0.00       0.00
 HCFC-141b        1984.0        0.0        0.0        0.0       0.00        0.0        0.0        0.0        0.0        0.0        0.0        0.0        0.0        0.0        0.0        0.0        0.0       0.00       0.00       0.00       0.00
 HCFC-141b        1985.0        0.0        0.0        0.0       0.00        0.0        0.0        0.0        0.0        0.0        0.0        0.0        0.0        0.0        0.0        0.0        0.0       0.00       0.00       0.00       0.00
 HCFC-141b        1986.0        0.0        0.0        0.0       0.00        0.0        0.0        0.0        0.0        0.0        0.0        0.0        0.0        0.0        0.0        0.0        0.0       0.00       0.00       0.00       0.00
 HCFC-141b        1987.0        0.0        0.0        0.0       0.00        0.0        0.0        0.0        0.0        0.0        0.0        0.0        0.0        0.0        0.0        0.0        0.0       0.00       0.00       0.00       0.00
 HCFC-141b        1988.0        0.0        0.0        0.0       0.00        0.0        0.0        0.0        0.0        0.0        0.0        0.0        0.0        0.0        0.0        0.0        0.0       0.00       0.00       0.00       0.00
 HCFC-141b        1989.0     1007.1        0.0        0.0       0.00       50.3      908.5     1007.1     1105.8        0.0        0.0        0.0        0.0        0.0        0.0        0.0        0.0       0.00       0.00       0.00       0.00
 HCFC-141b        1990.0     6332.1    71201.9      116.7       0.00      316.4     5711.7     6332.1     6952.5   211600.6  -343872.3    71461.1   486649.0        3.7      109.6      116.6      124.3       0.00       0.00       0.00       0.00
 HCFC-141b        1991.0    11657.0    77417.4     1084.8       0.01      582.5    10515.0    11657.1    12799.1   211483.7  -337466.7    77702.2   492724.5       34.2     1020.4     1083.8     1155.0       0.00       0.01       0.01       0.01
 HCFC-141b        1992.0    16982.0    87989.6     5889.6       0.06      848.6    15318.2    16982.0    18645.8   211264.9  -326559.1    88318.7   503104.5      188.0     5535.8     5884.3     6275.3       0.00       0.06       0.06       0.06
 HCFC-141b        1993.0    27827.0    99082.1    18821.0       0.34     1390.6    25100.7    27827.0    30553.3   210923.9  -314794.0    99383.1   513594.8      617.4    17657.1    18804.4    20088.2       0.00       0.34       0.34       0.34
 HCFC-141b        1994.0    85453.6   108088.0    31654.7       1.24     4270.4    77081.6    85453.6    93825.8   210309.3  -304528.9   108431.2   521284.8     1129.0    29517.3    31625.8    33963.1       0.00       1.24       1.24       1.24
 HCFC-141b        1995.0   112282.5   161886.9    41661.5       2.67     5611.1   101282.0   112282.6   123283.2   208587.8  -247310.5   162281.5   571546.3     1669.8    38486.5    41621.0    45057.2       0.00       2.67       2.67       2.67
 HCFC-141b        1996.0   106451.0   232507.9    49602.9       4.45     5319.7    96021.8   106451.1   116880.4   206370.9  -172158.8   232814.3   638042.7     2251.5    45310.1    49554.5    54159.5       0.00       4.45       4.45       4.45
 HCFC-141b        1997.0   114232.0   289356.0    48413.1       6.45     5708.6   103040.5   114232.1   125423.7   204220.9  -110767.2   289643.4   690477.6     2688.1    43265.2    48367.8    53829.4       0.00       6.45       6.45       6.45
 HCFC-141b        1998.0   133761.0   355175.0    55282.6       8.18     6684.5   120656.2   133761.1   146866.0   201976.0   -40647.1   355560.8   752029.3     3273.2    49001.4    55230.9    61864.4       0.00       8.18       8.18       8.18
 HCFC-141b        1999.0   144272.0   433653.4    55448.5      10.08     7209.8   130137.4   144272.1   158406.8   199532.1    43162.5   433821.3   825780.5     3764.6    48200.5    55394.8    62990.7       0.00      10.08      10.08      10.08
 HCFC-141b        2000.0   140360.0   522476.9    58154.9      11.79     7014.3   126608.7   140360.1   154111.6   197113.3   136292.6   522471.6   910080.1     4271.3    49927.3    58097.4    66697.4       0.00      11.79      11.79      11.79
 HCFC-141b        2001.0   130891.0   604682.0    55557.0      13.46     6541.1   118067.4   130891.1   143714.8   194931.1   222729.7   604611.9   988445.2     4674.5    46532.1    55500.1    64904.4       0.00      13.46      13.46      13.46
 HCFC-141b        2002.0   148628.0   680016.0    56265.4      14.84     7427.4   134066.7   148628.1   163189.6   193058.9   301469.0   679890.1  1059777.9     5064.7    46484.0    56204.8    66380.0       0.00      14.84      14.84      14.84
 HCFC-141b        2003.0    90918.6   772378.5    50808.4      16.11     4543.5    82011.2    90918.6    99826.2   191353.0   396689.1   772387.5  1148511.8     5327.0    40503.4    50753.7    61405.8       0.00      16.11      16.11      16.11
 HCFC-141b        2004.0    77687.9   812488.7    44438.7      16.99     3882.3    70076.6    77687.9    85299.2   190217.8   439264.5   812444.9  1186252.8     5475.1    33818.7    44392.2    55314.7       0.00      16.99      16.99      16.99
 HCFC-141b        2005.0    58631.3   845737.8    43110.5      17.46     2930.0    52887.1    58631.3    64375.6   189353.3   474639.6   845622.7  1217250.8     5590.0    32262.5    43065.4    54212.1       0.00      17.46      17.46      17.46
 HCFC-141b        2006.0    84562.2   861258.6    51365.6      17.83     4225.9    76277.5    84562.3    92847.1   188751.4   491442.1   861246.6  1231398.9     5816.0    40095.5    51312.1    62924.4       0.00      17.83      17.83      17.83
 HCFC-141b        2007.0    94155.0   894455.2    47278.2      18.56     4705.2    84930.5    94155.1   103379.7   188322.2   525219.4   894560.9  1263999.1     5960.9    35709.9    47227.4    59115.1       0.00      18.56      18.56      18.56
 HCFC-141b        2008.0    97044.1   941332.1    51123.7      19.01     4849.6    87536.6    97044.2   106551.9   188166.0   572439.4   941334.4  1310236.0     6147.3    39201.5    51070.1    63334.1       0.00      19.01      19.01      19.01
 HCFC-141b        2009.0   117637.1   987252.5    72370.8      19.61     5878.7   106112.0   117637.2   129162.5   188324.8   617952.3   987232.6  1356371.4    20873.8    41639.9    70907.2   109484.6       0.00      19.61      19.61      19.61
 HCFC-141b        2010.0   139070.0  1032518.9    76348.7      21.20     6949.8   125445.1   139070.1   152695.2   196899.0   641054.4  1034646.3  1411385.3    18128.3    45051.6    75275.5   113569.5       1.04      19.67      21.13      23.03
 HCFC-141b        2011.0   150810.4  1095240.2    81019.5      22.82     7536.5   136035.2   150810.4   165585.8   206486.6   679974.3  1099471.5  1486776.9    18192.2    48705.7    80099.3   118762.5       1.80      19.89      22.71      26.34
 HCFC-141b        2012.0   162550.7  1165031.1    86187.3      24.52     8123.2   146625.3   162550.8   178476.4   217602.1   722254.4  1171309.8  1572682.5    18646.6    52568.0    85368.9   124950.0       2.51      20.28      24.36      29.60
 HCFC-141b        2013.0   133199.8  1241394.5    88955.4      26.30     6656.4   120150.0   133199.9   146249.9   230292.9   767533.9  1249418.8  1668144.8    18196.7    55303.6    88394.8   126486.5       3.19      20.82      26.11      32.86
 HCFC-141b        2014.0   133199.8  1285639.0    91561.8      28.04     6656.4   120150.0   133199.9   146249.9   243282.5   780293.4  1295055.3  1733767.3    17844.0    57916.0    91228.6   127834.3       3.78      21.44      27.83      35.91
 HCFC-141b        2015.0   107058.7  1327277.1    92195.5      29.74     5350.1    96570.0   107058.8   117547.7   256584.8   791459.2  1337972.0  1797947.1    16846.8    59536.6    92204.0   125379.8       4.31      22.13      29.51      38.76
 HCFC-141b        2016.0   107058.7  1342140.3    92831.0      31.30     5350.1    96570.0   107058.8   117547.7   269253.0   778255.1  1353551.0  1836307.9    16011.8    61096.2    93114.0   123361.2       4.75      22.82      31.06      41.27
 HCFC-141b        2017.0   107058.7  1356368.0    93452.7      32.73     5350.1    96570.0   107058.8   117547.7   281471.6   766595.4  1368102.0  1873210.1    15281.0    62587.7    93955.9   121691.4       5.11      23.51      32.49      43.46
 HCFC-141b        2018.0   107058.7  1369974.0    94056.5      34.06     5350.1    96570.0   107058.8   117547.7   293258.2   756153.9  1381695.4  1910391.1    14630.6    63992.2    94755.0   120324.5       5.42      24.19      33.82      45.42
 HCFC-141b        2019.0   107058.7  1382976.3    94640.0      35.29     5350.1    96570.0   107058.8   117547.7   304627.5   747418.1  1394204.5  1946593.5    14045.4    65395.5    95494.4   119227.9       5.69      24.87      35.05      47.17
 HCFC-141b        2020.0    70425.3  1395395.0    92666.8      36.42     3519.4    63525.6    70425.3    77325.1   315594.2   739669.4  1405897.8  1982486.8    12706.5    65508.9    93783.5   113759.9       5.91      25.55      36.20      48.74
 HCFC-141b        2021.0    70425.3  1373153.5    90890.9      37.35     3519.4    63525.6    70425.3    77325.1   325032.8   701203.0  1382622.1  1982081.0    11587.6    65606.6    92180.4   109458.0       6.06      26.14      37.13      49.96
 HCFC-141b        2022.0    70425.3  1352687.9    89276.9      38.09     3519.4    63525.6    70425.3    77325.1   333357.2   668127.1  1360638.8  1982311.4    10638.3    65690.8    90634.1   105912.7       6.16      26.66      37.88      50.92
 HCFC-141b        2023.0    70425.3  1333836.3    87805.9      38.69     3519.4    63525.6    70425.3    77325.1   340725.7   639693.4  1340063.3  1982882.4     9827.2    65799.5    89161.2   102924.5       6.22      27.12      38.48      51.64
 HCFC-141b        2024.0    70425.3  1316455.8    86462.5      39.16     3519.4    63525.6    70425.3    77325.1   347266.1   614802.4  1320633.8  1983666.9     9130.8    65874.2    87764.8   100401.4       6.26      27.52      38.95      52.17
 HCFC-141b        2025.0    35469.1  1300418.5    82814.5      39.52     1772.5    31994.1    35469.1    38944.1   353085.8   593012.5  1302806.6  1983955.4     8091.9    64378.2    83972.0    94992.5       6.28      27.88      39.29      52.57
 HCFC-141b        2026.0    35469.1  1253073.0    79479.0      39.66     1772.5    31994.1    35469.1    38944.1   357239.6   544061.9  1252848.8  1950234.4     7287.6    62962.0    80453.6    90419.1       6.26      28.10      39.42      52.69
 HCFC-141b        2027.0    35469.1  1209063.2    76412.4      39.63     1772.5    31994.1    35469.1    38944.1   360142.8   501372.7  1206329.5  1918336.5     6692.6    61361.3    77240.8    86507.9       6.22      28.24      39.36      52.62
 HCFC-141b        2028.0    35469.1  1168119.9    73587.7      39.45     1772.5    31994.1    35469.1    38944.1   361997.9   464634.3  1162982.3  1887546.5     6263.7    59648.1    74316.8    83059.2       6.16      28.27      39.16      52.36
 HCFC-141b        2029.0    35469.1  1130001.2    70982.3      39.16     1772.5    31994.1    35469.1    38944.1   362970.7   432823.2  1122241.8  1857411.0     5961.4    57762.9    71651.0    79990.5       6.10      28.22      38.83      52.02
 HCFC-141b        2030.0     2688.9  1094488.0    66307.5      38.77      134.4     2425.5     2688.9     2952.4   363199.9   405357.6  1083950.9  1828732.8     6136.5    52569.9    67087.2    75011.2       6.04      28.06      38.41      51.59
 HCFC-141b        2031.0     2688.9  1030869.3    62010.6      38.19      134.4     2425.5     2688.9     2952.4   361892.2   352915.4  1017688.5  1768592.1     6402.9    46845.5    62981.0    70652.3       5.98      27.74      37.80      50.98
 HCFC-141b        2032.0     2688.9   971547.7    58044.4      37.46      134.4     2425.5     2688.9     2952.4   359414.8   307764.2   955530.7  1711835.1     6727.9    41201.4    59244.5    66804.9       5.91      27.28      37.03      50.17
 HCFC-141b        2033.0     2688.9   916192.2    54377.8      36.61      134.4     2425.5     2688.9     2952.4   355977.8   268556.0   897495.4  1656651.1     7053.5    36134.0    55808.8    63355.0       5.85      26.63      36.15      49.29
 HCFC-141b        2034.0     2688.9   864503.3    50984.0      35.67      134.4     2425.5     2688.9     2952.4   351754.0   234611.9   842999.1  1603671.6     7348.2    31627.7    52619.6    60222.9       5.80      25.84      35.17      48.33
 HCFC-141b        2035.0     2688.9   816208.2    47839.6      34.65      134.4     2425.5     2688.9     2952.4   346888.4   205309.5   791777.1  1552504.0     7598.0    27715.3    49636.6    57377.5       5.77      24.92      34.15      47.32
 HCFC-141b        2036.0     2688.9   771057.6    44923.5      33.59      134.4     2425.5     2688.9     2952.4   341503.9   180061.7   743891.3  1503056.3     7797.9    24322.1    46823.5    54770.6       5.74      23.93      33.07      46.24
 HCFC-141b        2037.0     2688.9   728823.1    42216.9      32.49      134.4     2425.5     2688.9     2952.4   335705.3   158088.0   699191.8  1455020.9     7948.6    21407.0    44163.7    52375.7       5.73      22.86      31.97      45.12
 HCFC-141b        2038.0     2688.9   689295.1    39702.7      31.36      134.4     2425.5     2688.9     2952.4   329581.7   139173.1   657369.1  1408536.8     8052.8    18877.3    41635.6    50154.5       5.72      21.72      30.85      44.00
 HCFC-141b        2039.0     2688.9   652281.4    37365.6      30.23      134.4     2425.5     2688.9     2952.4   323209.6   122740.3   618183.5  1363845.5     8114.7    16673.5    39228.4    48093.4       5.72      20.52      29.73      42.86
 HCFC-141b        2040.0        0.0   617604.7    35005.6      29.10        0.0        0.0        0.0        0.0   316654.3   108560.5   581443.7  1320349.0     8211.9    14413.1    36780.0    46063.3       5.72      19.32      28.61      41.72
 HCFC-141b        2041.0        0.0   582599.1    32812.0      27.96        0.0        0.0        0.0        0.0   309907.2    93986.2   544491.6  1275806.4     8257.6    12458.8    34469.2    44165.2       5.72      18.10      27.49      40.55
 HCFC-141b        2042.0        0.0   549787.1    30770.7      26.83        0.0        0.0        0.0        0.0   303030.3    81263.2   509841.7  1233100.6     8263.4    10770.0    32297.6    42395.3       5.71      16.87      26.38      39.38
 HCFC-141b        2043.0        0.0   519016.3    28869.8      25.72        0.0        0.0        0.0        0.0   296074.1    70298.8   477458.7  1191753.0     8235.7     9311.0    30255.8    40736.3       5.71      15.67      25.28      38.23
 HCFC-141b        2044.0        0.0   490146.5    27098.4      24.62        0.0        0.0        0.0        0.0   289081.3    60825.4   447148.2  1151681.5     8179.6     8047.8    28340.9    39178.2       5.70      14.51      24.20      37.08
 HCFC-141b        2045.0        0.0   463048.1    25446.7      23.54        0.0        0.0        0.0        0.0   282088.2    52614.2   418650.4  1113475.0     8099.6     6952.1    26543.6    37707.2       5.68      13.39      23.15      35.97
 HCFC-141b        2046.0        0.0   437601.3    23905.7      22.50        0.0        0.0        0.0        0.0   275125.3    45510.3   391986.6  1076031.0     7999.4     6008.1    24861.2    36316.8       5.66      12.34      22.11      34.82
 HCFC-141b        2047.0        0.0   413695.6    22467.2      21.48        0.0        0.0        0.0        0.0   268218.5    39347.4   367080.2  1040243.1     7882.4     5192.1    23281.8    34996.3       5.63      11.35      21.11      33.70
 HCFC-141b        2048.0        0.0   391228.4    21123.7      20.49        0.0        0.0        0.0        0.0   261389.8    34053.9   343801.9  1005519.1     7751.6     4485.9    21806.4    33738.8       5.59      10.41      20.13      32.61
 HCFC-141b        2049.0        0.0   370104.7    19868.2      19.53        0.0        0.0        0.0        0.0   254657.3    29449.2   321897.5   971555.9     7609.4     3875.8    20425.3    32540.9       5.55       9.54      19.18      31.56
 HCFC-141b        2050.0        0.0   350236.5    18694.3      18.61        0.0        0.0        0.0        0.0   248036.4    25477.8   301469.5   938922.1     7458.1     3348.8    19124.5    31402.6       5.50       8.74      18.26      30.53
 HCFC-141b        2051.0        0.0   331542.2    17596.4      17.72        0.0        0.0        0.0        0.0   241539.6    22033.5   282301.8   907501.7     7299.5     2893.0    17906.6    30307.7       5.44       7.99      17.37      29.52
 HCFC-141b        2052.0        0.0   313945.8    16568.9      16.86        0.0        0.0        0.0        0.0   235177.2    19065.2   264323.7   876903.1     7135.4     2500.0    16769.3    29271.9       5.38       7.30      16.52      28.52
 HCFC-141b        2053.0        0.0   297376.9    15606.9      16.04        0.0        0.0        0.0        0.0   228957.6    16493.4   247496.0   847432.6     6967.2     2160.6    15705.2    28275.8       5.31       6.66      15.69      27.58
 HCFC-141b        2054.0        0.0   281770.0    14705.9      15.25        0.0        0.0        0.0        0.0   222887.3    14266.7   231766.9   819270.2     6796.1     1867.1    14710.1    27313.9       5.23       6.07      14.90      26.64
 HCFC-141b        2055.0        0.0   267064.1    13861.6      14.50        0.0        0.0        0.0        0.0   216971.3    12342.1   217070.9   792105.4     6623.2     1613.6    13776.6    26382.5       5.15       5.53      14.14      25.72
 HCFC-141b        2056.0        0.0   253202.5    13070.1      13.78        0.0        0.0        0.0        0.0   211213.6    10677.4   203266.5   765628.0     6449.5     1393.8    12899.6    25489.8       5.06       5.02      13.41      24.84
 HCFC-141b        2057.0        0.0   240132.4    12327.9      13.09        0.0        0.0        0.0        0.0   205616.7     9239.6   190344.8   740085.9     6275.8     1205.0    12079.3    24634.2       4.97       4.57      12.70      23.98
 HCFC-141b        2058.0        0.0   227804.5    11631.5      12.43        0.0        0.0        0.0        0.0   200182.3     7989.1   178240.9   715392.9     6102.7     1040.6    11312.0    23811.5       4.88       4.15      12.03      23.15
 HCFC-141b        2059.0        0.0   216173.0    10977.9      11.80        0.0        0.0        0.0        0.0   194911.3     6909.1   166906.4   691591.3     5930.8      899.2    10593.1    23016.8       4.78       3.76      11.39      22.35
 HCFC-141b        2060.0        0.0   205195.1    10364.3      11.20        0.0        0.0        0.0        0.0   189803.8     5979.8   156287.5   668569.6     5760.7      777.7     9918.0    22237.5       4.69       3.41      10.78      21.57
 HCFC-141b        2061.0        0.0   194830.9     9787.9      10.63        0.0        0.0        0.0        0.0   184859.2     5172.3   146365.1   646348.6     5592.7      671.7     9286.2    21485.5       4.58       3.10      10.20      20.82
 HCFC-141b        2062.0        0.0   185043.0     9246.3      10.09        0.0        0.0        0.0        0.0   180076.6     4473.9   137075.0   624930.1     5427.2      580.7     8696.1    20764.1       4.48       2.81       9.64      20.08
 HCFC-141b        2063.0        0.0   175796.6     8737.3       9.58        0.0        0.0        0.0        0.0   175454.4     3869.0   128358.3   603884.5     5264.6      501.7     8142.3    20071.4       4.38       2.54       9.11      19.38
 HCFC-141b        2064.0        0.0   167059.3     8258.7       9.09        0.0        0.0        0.0        0.0   170990.7     3346.3   120207.0   583509.8     5104.9      433.8     7624.3    19397.0       4.28       2.30       8.61      18.69
 HCFC-141b        2065.0        0.0   158800.6     7808.6       8.62        0.0        0.0        0.0        0.0   166683.4     2894.5   112561.0   564110.3     4948.5      374.7     7140.0    18745.4       4.17       2.08       8.13      18.03
 HCFC-141b        2066.0        0.0   150992.0     7385.0       8.18        0.0        0.0        0.0        0.0   162529.8     2504.8   105416.6   545402.1     4795.5      323.9     6686.2    18115.2       4.07       1.89       7.67      17.40
 HCFC-141b        2067.0        0.0   143607.0     6986.4       7.76        0.0        0.0        0.0        0.0   158527.2     2166.4    98712.8   527275.1     4646.0      279.7     6260.7    17502.5       3.96       1.70       7.24      16.79
 HCFC-141b        2068.0        0.0   136620.6     6611.1       7.36        0.0        0.0        0.0        0.0   154672.8     1875.6    92447.5   509811.3     4500.0      241.7     5862.2    16910.1       3.86       1.54       6.83      16.20
 HCFC-141b        2069.0        0.0   130009.6     6257.6       6.98        0.0        0.0        0.0        0.0   150963.3     1622.7    86572.2   492697.1     4357.7      208.9     5490.2    16343.4       3.76       1.39       6.44      15.63
 HCFC-141b        2070.0        0.0   123752.0     5924.6       6.62        0.0        0.0        0.0        0.0   147395.6     1404.6    81062.3   476245.8     4219.2      180.3     5141.3    15794.3       3.65       1.26       6.07      15.07
 HCFC-141b        2071.0        0.0   117827.4     5610.8       6.28        0.0        0.0        0.0        0.0   143966.2     1215.9    75897.0   460402.9     4084.3      155.8     4814.3    15259.7       3.55       1.13       5.72      14.54
 HCFC-141b        2072.0        0.0   112216.7     5314.9       5.95        0.0        0.0        0.0        0.0   140671.9     1051.8    71067.9   445000.8     3953.1      134.6     4508.0    14747.2       3.45       1.02       5.39      14.04
 HCFC-141b        2073.0        0.0   106901.8     5036.0       5.65        0.0        0.0        0.0        0.0   137509.0      910.0    66543.4   430147.7     3825.7      116.4     4221.2    14252.7       3.35       0.92       5.08      13.54
 HCFC-141b        2074.0        0.0   101865.8     4772.9       5.36        0.0        0.0        0.0        0.0   134474.0      787.8    62303.7   415772.2     3701.9      100.5     3952.9    13773.4       3.26       0.83       4.79      13.07
 HCFC-141b        2075.0        0.0    97092.9     4524.6       5.08        0.0        0.0        0.0        0.0   131563.4      682.1    58333.6   401922.1     3581.7       86.9     3701.4    13312.1       3.16       0.75       4.51      12.61
 HCFC-141b        2076.0        0.0    92568.3     4290.4       4.82        0.0        0.0        0.0        0.0   128773.6      589.8    54629.4   388617.8     3465.2       75.1     3465.8    12867.1       3.07       0.68       4.24      12.17
 HCFC-141b        2077.0        0.0    88277.9     4069.2       4.57        0.0        0.0        0.0        0.0   126100.9      510.4    51153.3   375710.7     3352.2       64.9     3245.4    12435.0       2.98       0.61       3.99      11.75
 HCFC-141b        2078.0        0.0    84208.7     3860.3       4.34        0.0        0.0        0.0        0.0   123541.9      441.6    47898.4   363181.4     3242.6       56.1     3039.3    12017.6       2.89       0.55       3.76      11.33
 HCFC-141b        2079.0        0.0    80348.4     3663.1       4.12        0.0        0.0        0.0        0.0   121092.9      381.6    44848.2   351206.6     3136.5       48.5     2845.8    11616.7       2.80       0.49       3.54      10.94
 HCFC-141b        2080.0        0.0    76685.3     3476.7       3.91        0.0        0.0        0.0        0.0   118750.4      330.3    41995.4   339559.0     3033.7       41.9     2665.1    11225.9       2.71       0.44       3.33      10.56
 HCFC-141b        2081.0        0.0    73208.6     3300.6       3.71        0.0        0.0        0.0        0.0   116510.9      285.7    39330.0   328314.5     2934.2       36.2     2495.5    10848.2       2.63       0.40       3.13      10.19
 HCFC-141b        2082.0        0.0    69908.0     3134.1       3.52        0.0        0.0        0.0        0.0   114370.8      247.2    36827.6   317404.6     2837.9       31.3     2336.8    10483.6       2.55       0.36       2.95       9.83
 HCFC-141b        2083.0        0.0    66773.9     2976.7       3.34        0.0        0.0        0.0        0.0   112326.8      213.9    34489.0   306889.5     2744.7       27.0     2188.0    10130.6       2.47       0.32       2.77       9.49
 HCFC-141b        2084.0        0.0    63797.2     2827.8       3.17        0.0        0.0        0.0        0.0   110375.4      185.1    32301.0   296689.1     2654.6       23.4     2048.8     9795.4       2.39       0.29       2.60       9.16
 HCFC-141b        2085.0        0.0    60969.4     2687.0       3.01        0.0        0.0        0.0        0.0   108513.4      160.1    30248.0   286842.1     2567.4       20.2     1918.7     9463.8       2.31       0.26       2.45       8.83
 HCFC-141b        2086.0        0.0    58282.4     2553.7       2.86        0.0        0.0        0.0        0.0   106737.3      138.5    28325.1   277300.1     2483.1       17.4     1796.6     9147.6       2.24       0.24       2.30       8.52
 HCFC-141b        2087.0        0.0    55728.8     2427.5       2.71        0.0        0.0        0.0        0.0   105044.1      119.8    26517.3   268110.3     2401.6       15.1     1682.3     8841.2       2.17       0.21       2.16       8.23
 HCFC-141b        2088.0        0.0    53301.2     2308.1       2.58        0.0        0.0        0.0        0.0   103430.5      103.6    24831.9   259075.1     2322.8       13.0     1575.2     8544.5       2.10       0.19       2.03       7.94
 HCFC-141b        2089.0        0.0    50993.1     2195.0       2.45        0.0        0.0        0.0        0.0   101893.3       89.7    23250.4   250482.1     2246.7       11.3     1474.9     8257.5       2.03       0.17       1.91       7.67
 HCFC-141b        2090.0        0.0    48798.0     2087.9       2.32        0.0        0.0        0.0        0.0   100429.7       77.6    21772.9   242089.4     2173.1        9.7     1381.0     7983.1       1.97       0.15       1.79       7.40
 HCFC-141b        2091.0        0.0    46710.1     1986.5       2.21        0.0        0.0        0.0        0.0    99036.6       67.1    20391.2   234061.8     2102.0        8.4     1292.8     7715.7       1.90       0.14       1.69       7.14
 HCFC-141b        2092.0        0.0    44723.6     1890.3       2.10        0.0        0.0        0.0        0.0    97711.1       58.1    19097.4   226271.0     2033.3        7.3     1210.4     7454.0       1.84       0.12       1.58       6.90
 HCFC-141b        2093.0        0.0    42833.3     1799.2       1.99        0.0        0.0        0.0        0.0    96450.4       50.2    17885.3   218744.1     1967.0        6.3     1133.4     7207.6       1.78       0.11       1.49       6.65
 HCFC-141b        2094.0        0.0    41034.1     1712.8       1.89        0.0        0.0        0.0        0.0    95251.8       43.4    16748.2   211516.3     1902.9        5.4     1061.3     6964.1       1.72       0.10       1.40       6.43
 HCFC-141b        2095.0        0.0    39321.3     1630.9       1.80        0.0        0.0        0.0        0.0    94112.6       37.6    15683.9   204565.8     1841.0        4.7      993.7     6732.1       1.67       0.09       1.31       6.21
 HCFC-141b        2096.0        0.0    37690.4     1553.2       1.71        0.0        0.0        0.0        0.0    93030.1       32.5    14688.4   197820.0     1781.2        4.0      930.5     6506.2       1.61       0.08       1.23       6.00
 HCFC-141b        2097.0        0.0    36137.2     1479.5       1.63        0.0        0.0        0.0        0.0    92002.0       28.1    13753.7   191269.2     1723.4        3.5      871.4     6290.8       1.56       0.07       1.16       5.79
 HCFC-141b        2098.0        0.0    34657.7     1409.6       1.55        0.0        0.0        0.0        0.0    91025.7       24.3    12877.9   184915.2     1667.7        3.0      815.9     6081.3       1.51       0.07       1.09       5.59
 HCFC-141b        2099.0        0.0    33248.2     1343.2       1.47        0.0        0.0        0.0        0.0    90098.9       21.0    12059.1   178811.7     1613.8        2.6      764.1     5878.2       1.46       0.06       1.02       5.40
 HCFC-141b        2100.0        0.0    31905.0     1280.2       1.40        0.0        0.0        0.0        0.0    89219.3       18.2    11291.6   172855.5     1561.8        2.3      715.5     5680.9       1.41       0.05       0.96       5.21
 HCFC-141b        2101.0        0.0    30624.8     1220.4       1.33        0.0        0.0        0.0        0.0    88384.7       15.7    10573.1   167107.4     1511.6        2.0      670.0     5491.4       1.37       0.05       0.90       5.03
 HCFC-141b        2102.0        0.0    29404.5     1163.6       1.27        0.0        0.0        0.0        0.0    87593.0       13.6     9899.4   161536.0     1463.1        1.7      627.5     5309.8       1.32       0.04       0.84       4.86
 HCFC-141b        2103.0        0.0    28240.9     1109.6       1.20        0.0        0.0        0.0        0.0    86842.2       11.8     9271.0   156173.5     1416.2        1.5      587.6     5132.7       1.28       0.04       0.79       4.69
 HCFC-141b        2104.0        0.0    27131.3     1058.3       1.15        0.0        0.0        0.0        0.0    86130.2       10.2     8682.3   150971.7     1371.0        1.3      550.2     4960.8       1.24       0.03       0.74       4.53
 HCFC-141b        2105.0        0.0    26073.0     1009.6       1.09        0.0        0.0        0.0        0.0    85455.3        8.8     8129.6   145981.8     1327.4        1.1      515.2     4794.4       1.20       0.03       0.70       4.38
 HCFC-141b        2106.0        0.0    25063.4      963.3       1.04        0.0        0.0        0.0        0.0    84815.5        7.6     7612.9   141126.7     1285.2        0.9      482.3     4634.0       1.16       0.03       0.65       4.23
 HCFC-141b        2107.0        0.0    24100.0      919.3       0.99        0.0        0.0        0.0        0.0    84209.2        6.6     7128.3   136441.5     1244.5        0.8      451.7     4478.0       1.12       0.02       0.61       4.08
 HCFC-141b        2108.0        0.0    23180.7      877.5       0.94        0.0        0.0        0.0        0.0    83634.6        5.7     6674.4   131892.6     1205.1        0.7      422.9     4328.1       1.08       0.02       0.57       3.95
 HCFC-141b        2109.0        0.0    22303.2      837.7       0.90        0.0        0.0        0.0        0.0    83090.3        4.9     6249.2   127496.4     1167.2        0.6      396.0     4180.5       1.05       0.02       0.54       3.81
 HCFC-141b        2110.0        0.0    21465.5      799.8       0.85        0.0        0.0        0.0        0.0    82574.5        4.3     5852.3   123259.0     1130.5        0.5      370.9     4040.4       1.01       0.02       0.51       3.68
 HCFC-141b        2111.0        0.0    20665.7      763.8       0.81        0.0        0.0        0.0        0.0    82086.0        3.7     5481.3   119133.7     1095.0        0.5      347.3     3904.7       0.98       0.02       0.47       3.56
 HCFC-141b        2112.0        0.0    19901.9      729.6       0.78        0.0        0.0        0.0        0.0    81623.3        3.2     5131.8   115197.8     1060.8        0.4      325.2     3773.7       0.95       0.01       0.44       3.44
 HCFC-141b        2113.0        0.0    19172.3      697.0       0.74        0.0        0.0        0.0        0.0    81185.0        2.8     4805.5   111373.0     1027.8        0.3      304.5     3647.9       0.92       0.01       0.42       3.32
 HCFC-141b        2114.0        0.0    18475.3      665.9       0.71        0.0        0.0        0.0        0.0    80769.9        2.4     4499.9   107632.6      995.9        0.3      285.1     3525.4       0.89       0.01       0.39       3.20
 HCFC-141b        2115.0        0.0    17809.3      636.4       0.67        0.0        0.0        0.0        0.0    80376.7        2.1     4214.1   104025.4      965.0        0.3      267.0     3408.1       0.86       0.01       0.37       3.09
 HCFC-141b        2116.0        0.0    17172.9      608.3       0.64        0.0        0.0        0.0        0.0    80004.4        1.8     3946.2   100552.0      935.2        0.2      250.0     3294.5       0.83       0.01       0.34       2.99
 HCFC-141b        2117.0        0.0    16564.7      581.5       0.61        0.0        0.0        0.0        0.0    79651.8        1.5     3695.0    97212.2      906.5        0.2      234.1     3184.6       0.80       0.01       0.32       2.89
 HCFC-141b        2118.0        0.0    15983.2      556.0       0.58        0.0        0.0        0.0        0.0    79317.9        1.3     3460.3    93988.5      878.7        0.2      219.1     3078.5       0.78       0.01       0.30       2.79
 HCFC-141b        2119.0        0.0    15427.2      531.6       0.56        0.0        0.0        0.0        0.0    79001.7        1.2     3240.8    90852.6      851.8        0.1      205.2     2975.7       0.75       0.01       0.28       2.70
 HCFC-141b        2120.0        0.0    14895.6      508.5       0.53        0.0        0.0        0.0        0.0    78702.2        1.0     3034.4    87835.2      825.8        0.1      192.1     2876.8       0.73       0.01       0.27       2.60
 
 Species            Year  Prod_mean  Bank_mean  Emis_mean   Mix_mean  Prod_stdv  Prod_2.5p   Prod_50p Prod_97.5p  Bank_stdv  Bank_2.5p   Bank_50p Bank_97.5p  Emis_stdv  Emis_2.5p   Emis_50p Emis_97.5p   Mix_stdv   Mix_2.5p    Mix_50p  Mix_97.5p
 HCFC-142b        1950.0        0.0        0.0        0.0       0.00        0.0        0.0        0.0        0.0        0.0        0.0        0.0        0.0        0.0        0.0        0.0        0.0       0.00       0.00       0.00       0.00
 HCFC-142b        1951.0        0.0        0.0        0.0       0.00        0.0        0.0        0.0        0.0        0.0        0.0        0.0        0.0        0.0        0.0        0.0        0.0       0.00       0.00       0.00       0.00
 HCFC-142b        1952.0        0.0        0.0        0.0       0.00        0.0        0.0        0.0        0.0        0.0        0.0        0.0        0.0        0.0        0.0        0.0        0.0       0.00       0.00       0.00       0.00
 HCFC-142b        1953.0        0.0        0.0        0.0       0.00        0.0        0.0        0.0        0.0        0.0        0.0        0.0        0.0        0.0        0.0        0.0        0.0       0.00       0.00       0.00       0.00
 HCFC-142b        1954.0        0.0        0.0        0.0       0.00        0.0        0.0        0.0        0.0        0.0        0.0        0.0        0.0        0.0        0.0        0.0        0.0       0.00       0.00       0.00       0.00
 HCFC-142b        1955.0        0.0        0.0        0.0       0.00        0.0        0.0        0.0        0.0        0.0        0.0        0.0        0.0        0.0        0.0        0.0        0.0       0.00       0.00       0.00       0.00
 HCFC-142b        1956.0        0.0        0.0        0.0       0.00        0.0        0.0        0.0        0.0        0.0        0.0        0.0        0.0        0.0        0.0        0.0        0.0       0.00       0.00       0.00       0.00
 HCFC-142b        1957.0        0.0        0.0        0.0       0.00        0.0        0.0        0.0        0.0        0.0        0.0        0.0        0.0        0.0        0.0        0.0        0.0       0.00       0.00       0.00       0.00
 HCFC-142b        1958.0        0.0        0.0        0.0       0.00        0.0        0.0        0.0        0.0        0.0        0.0        0.0        0.0        0.0        0.0        0.0        0.0       0.00       0.00       0.00       0.00
 HCFC-142b        1959.0        0.0        0.0        0.0       0.00        0.0        0.0        0.0        0.0        0.0        0.0        0.0        0.0        0.0        0.0        0.0        0.0       0.00       0.00       0.00       0.00
 HCFC-142b        1960.0        0.0        0.0        0.0       0.00        0.0        0.0        0.0        0.0        0.0        0.0        0.0        0.0        0.0        0.0        0.0        0.0       0.00       0.00       0.00       0.00
 HCFC-142b        1961.0        0.0        0.0        0.0       0.00        0.0        0.0        0.0        0.0        0.0        0.0        0.0        0.0        0.0        0.0        0.0        0.0       0.00       0.00       0.00       0.00
 HCFC-142b        1962.0        0.0        0.0        0.0       0.00        0.0        0.0        0.0        0.0        0.0        0.0        0.0        0.0        0.0        0.0        0.0        0.0       0.00       0.00       0.00       0.00
 HCFC-142b        1963.0        0.0        0.0        0.0       0.00        0.0        0.0        0.0        0.0        0.0        0.0        0.0        0.0        0.0        0.0        0.0        0.0       0.00       0.00       0.00       0.00
 HCFC-142b        1964.0        0.0        0.0        0.0       0.00        0.0        0.0        0.0        0.0        0.0        0.0        0.0        0.0        0.0        0.0        0.0        0.0       0.00       0.00       0.00       0.00
 HCFC-142b        1965.0        0.0        0.0        0.0       0.00        0.0        0.0        0.0        0.0        0.0        0.0        0.0        0.0        0.0        0.0        0.0        0.0       0.00       0.00       0.00       0.00
 HCFC-142b        1966.0        0.0        0.0        0.0       0.00        0.0        0.0        0.0        0.0        0.0        0.0        0.0        0.0        0.0        0.0        0.0        0.0       0.00       0.00       0.00       0.00
 HCFC-142b        1967.0        0.0        0.0        0.0       0.00        0.0        0.0        0.0        0.0        0.0        0.0        0.0        0.0        0.0        0.0        0.0        0.0       0.00       0.00       0.00       0.00
 HCFC-142b        1968.0        0.0        0.0        0.0       0.00        0.0        0.0        0.0        0.0        0.0        0.0        0.0        0.0        0.0        0.0        0.0        0.0       0.00       0.00       0.00       0.00
 HCFC-142b        1969.0        0.0        0.0        0.0       0.00        0.0        0.0        0.0        0.0        0.0        0.0        0.0        0.0        0.0        0.0        0.0        0.0       0.00       0.00       0.00       0.00
 HCFC-142b        1970.0        0.0        0.0        0.0       0.00        0.0        0.0        0.0        0.0        0.0        0.0        0.0        0.0        0.0        0.0        0.0        0.0       0.00       0.00       0.00       0.00
 HCFC-142b        1971.0        0.0    32338.8      818.7       0.00        0.0        0.0        0.0        0.0    70818.8  -105977.8    32355.6   171604.1       24.8      772.1      817.9      869.4       0.00       0.00       0.00       0.00
 HCFC-142b        1972.0        0.0    31520.2      816.8       0.05        0.0        0.0        0.0        0.0    70812.9  -106796.5    31538.5   170782.2       26.2      767.5      816.0      870.3       0.00       0.05       0.05       0.05
 HCFC-142b        1973.0        0.0    30703.4      814.8       0.09        0.0        0.0        0.0        0.0    70805.1  -107587.8    30726.0   169932.9       28.6      760.7      814.0      873.1       0.00       0.09       0.09       0.09
 HCFC-142b        1974.0        0.0    29888.6      813.0       0.14        0.0        0.0        0.0        0.0    70795.3  -108386.9    29910.4   169102.0       31.7      752.9      812.2      877.2       0.00       0.14       0.14       0.14
 HCFC-142b        1975.0        0.0    29075.6      811.4       0.18        0.0        0.0        0.0        0.0    70783.7  -109198.5    29097.4   168268.7       35.1      744.5      810.6      882.1       0.00       0.18       0.18       0.18
 HCFC-142b        1976.0        0.0    28264.2      809.7       0.21        0.0        0.0        0.0        0.0    70770.4  -109995.8    28284.0   167430.3       38.6      735.9      808.9      887.4       0.00       0.21       0.21       0.21
 HCFC-142b        1977.0        0.0    27454.5      808.2       0.25        0.0        0.0        0.0        0.0    70755.5  -110793.4    27473.4   166588.1       42.2      727.5      807.4      893.0       0.00       0.25       0.25       0.25
 HCFC-142b        1978.0        0.0    26646.3      806.9       0.28        0.0        0.0        0.0        0.0    70739.2  -111585.1    26659.8   165743.6       45.7      719.3      806.2      898.6       0.00       0.28       0.28       0.28
 HCFC-142b        1979.0        0.0    25839.4     1159.9       0.32        0.0        0.0        0.0        0.0    70721.4  -112328.6    25853.3   164900.1       56.2     1052.4     1158.8     1273.0       0.00       0.32       0.32       0.32
 HCFC-142b        1980.0        0.0    24679.5     1924.2       0.37        0.0        0.0        0.0        0.0    70699.8  -113449.0    24696.8   163686.2       78.7     1774.4     1922.3     2083.3       0.00       0.37       0.37       0.37
 HCFC-142b        1981.0     2845.7    22755.3     1936.6       0.46      142.2     2566.9     2845.7     3124.5    70670.7  -115332.9    22758.6   161667.9       87.3     1769.8     1934.7     2112.5       0.00       0.46       0.46       0.46
 HCFC-142b        1982.0     2087.8    23664.4     2049.3       0.55      104.3     1883.2     2087.8     2292.3    70566.4  -114182.0    23656.2   162342.7       98.3     1861.4     2047.3     2247.2       0.00       0.55       0.55       0.55
 HCFC-142b        1983.0     2424.4    23702.9     1606.5       0.64      121.2     2186.9     2424.4     2661.9    70476.8  -113986.1    23698.6   162208.3       98.9     1416.8     1605.1     1804.6       0.00       0.64       0.64       0.64
 HCFC-142b        1984.0     2587.2    24520.7     1313.5       0.70      129.3     2333.7     2587.2     2840.7    70378.2  -112948.9    24514.0   162809.0      100.7     1119.4     1312.2     1513.9       0.00       0.70       0.70       0.70
 HCFC-142b        1985.0     1507.0    25794.4     1227.0       0.74       75.3     1359.3     1507.0     1654.6    70275.4  -111476.8    25789.9   163920.5      104.0     1026.2     1225.9     1433.6       0.00       0.74       0.74       0.74
 HCFC-142b        1986.0     7833.0    26074.3     1301.5       0.77      391.4     7065.6     7833.0     8600.5    70198.4  -111034.4    26079.2   164035.0      108.8     1091.4     1300.3     1517.7       0.00       0.77       0.77       0.77
 HCFC-142b        1987.0     7571.2    32605.8     1957.3       0.81      378.4     6829.5     7571.2     8313.0    69963.6  -104025.8    32617.5   170123.7      123.3     1720.4     1955.5     2204.1       0.00       0.81       0.81       0.81
 HCFC-142b        1988.0     8625.0    38219.8     3636.5       0.88      431.0     7780.0     8625.0     9470.1    69730.7   -97986.0    38254.2   175302.5      165.0     3321.2     3633.0     3969.2       0.00       0.88       0.88       0.88
 HCFC-142b        1989.0    16191.0    43208.3     4187.6       1.04      809.1    14604.8    16191.0    17777.3    69459.2   -92482.3    43252.6   179818.7      193.2     3818.5     4183.6     4576.8       0.00       1.04       1.04       1.04
 HCFC-142b        1990.0    21896.0    55211.7    10182.6       1.23     1094.2    19750.8    21896.0    24041.3    68998.2   -79533.2    55261.0   190846.7      361.8     9497.8    10172.4    10918.9       0.00       1.23       1.23       1.23
 HCFC-142b        1991.0    27601.0    66925.1    18542.2       1.77     1379.3    24896.9    27601.0    30305.2    68362.4   -66513.8    66953.9   201414.4      628.7    17353.6    18523.2    19824.3       0.00       1.77       1.77       1.77
 HCFC-142b        1992.0    33306.0    75983.9    21352.0       2.76     1664.4    30043.0    33306.0    36569.2    67533.5   -55873.2    75985.0   208774.5      770.3    19893.4    21330.4    22919.3       0.00       2.76       2.76       2.76
 HCFC-142b        1993.0    37361.6    87937.9    24408.1       3.87     1867.1    33701.3    37361.6    41022.1    66545.9   -42004.8    87938.4   218851.1      932.7    22638.0    24382.9    26301.6       0.00       3.87       3.87       3.87
 HCFC-142b        1994.0    41535.2   100891.4    24648.3       5.09     2075.7    37466.0    41535.2    45604.7    65446.6   -26970.4   100871.4   229690.4     1040.3    22665.4    24623.8    26749.8       0.00       5.09       5.09       5.09
 HCFC-142b        1995.0    44813.9   117778.4    23135.5       6.26     2239.5    40423.4    44813.9    49204.6    64264.1    -7843.0   117786.0   244192.3     1114.9    21004.3    23113.4    25382.0       0.00       6.26       6.26       6.26
 HCFC-142b        1996.0    35502.0   139456.8    25350.0       7.29     1774.2    32023.8    35502.0    38980.3    63047.6    16175.8   139404.8   263447.2     1263.3    22932.1    25325.7    27894.5       0.00       7.29       7.29       7.29
 HCFC-142b        1997.0    41739.0   149608.8    23018.5       8.38     2085.8    37649.8    41739.0    45828.4    62011.3    28272.9   149560.4   271561.5     1330.3    20463.7    22997.2    25685.8       0.00       8.38       8.38       8.38
 HCFC-142b        1998.0    40179.0   168329.3    26464.9       9.28     2007.9    36242.6    40179.0    44115.6    60909.5    49065.1   168289.0   288078.1     1491.6    23603.0    26440.4    29458.2       0.00       9.28       9.28       9.28
 HCFC-142b        1999.0    40551.7   182043.4    27473.7      10.34     2026.5    36578.8    40551.7    44524.8    59863.7    64694.8   182056.4   299721.4     1623.3    24356.7    27448.5    30727.4       0.00      10.33      10.34      10.34
 HCFC-142b        2000.0    40274.1   195121.4    26957.5      11.39     2012.6    36328.4    40274.1    44220.0    58862.0    79666.8   195150.7   310838.8     1729.4    23634.9    26932.8    30417.4       0.00      11.39      11.39      11.39
 HCFC-142b        2001.0    33946.4   208438.0    25966.2      12.36     1696.4    30620.6    33946.4    37272.3    57932.2    94886.3   208494.9   322156.4     1821.2    22460.9    25940.5    29600.4       0.00      12.36      12.36      12.36
 HCFC-142b        2002.0    25086.3   216418.2    23690.2      13.22     1253.6    22628.6    25086.3    27544.2    57147.4   104313.4   216504.3   328632.8     1884.1    20053.3    23667.2    27435.8       0.00      13.22      13.22      13.22
 HCFC-142b        2003.0    31379.7   217814.3    23347.7      13.90     1568.1    28305.4    31379.7    34454.2    56522.0   106927.0   217861.1   328892.0     1958.1    19567.0    23325.9    27237.6       0.00      13.90      13.90      13.90
 HCFC-142b        2004.0    38050.0   225846.2    23390.7      14.52     1901.5    34322.2    38050.0    41778.0    55921.5   116189.5   225867.0   335648.4     2031.5    19464.1    23368.5    27423.6       0.00      14.52      14.52      14.52
 HCFC-142b        2005.0    29421.7   240505.5    26112.2      15.11     1470.3    26539.2    29421.7    32304.3    55379.1   131934.4   240537.2   349111.3     2139.2    21982.9    26087.4    30364.2       0.00      15.11      15.11      15.11
 HCFC-142b        2006.0    48489.1   243815.0    32606.8      15.83     2423.2    43738.6    48489.2    53239.9    54998.0   135955.6   243818.4   351680.9     2321.4    28138.1    32574.3    37234.9       0.00      15.83      15.83      15.83
 HCFC-142b        2007.0    50784.2   259697.3    37532.5      16.89     2537.9    45808.9    50784.3    55759.9    54677.6   152421.6   259736.9   366852.8     2522.1    32683.4    37497.2    42571.1       0.00      16.89      16.89      16.89
 HCFC-142b        2008.0    54036.6   272949.0    36350.6      18.18     2700.4    48742.6    54036.6    59330.9    54560.7   165983.8   272949.4   379918.1     2649.1    31247.1    36313.8    41630.0       0.00      18.18      18.18      18.18
 HCFC-142b        2009.0    60539.2   290635.0    38049.9      19.33     3025.3    54608.1    60539.2    66470.5    54689.6   183583.1   290631.2   397916.2     8524.9    22533.1    37717.8    55453.8       0.00      19.33      19.33      19.33
 HCFC-142b        2010.0    50190.9   313124.2    39149.0      20.53     2508.2    45273.6    50190.9    55108.3    57826.8   197978.5   313715.3   424836.3     7783.4    24184.6    39054.7    54751.6       0.51      19.59      20.51      21.57
 HCFC-142b        2011.0    55651.8   324166.1    40771.1      21.72     2781.1    50199.6    55651.8    61104.3    61564.0   200099.1   325175.4   441833.8     7427.1    26060.1    40822.9    55240.3       0.96      19.93      21.69      23.67
 HCFC-142b        2012.0    61112.7   339046.7    42837.5      22.95     3054.0    55125.5    61112.8    67100.3    65864.5   205494.2   340382.7   464427.2     7286.2    28106.6    42992.5    56762.0       1.36      20.35      22.92      25.70
 HCFC-142b        2013.0    47460.4   357322.0    43136.2      24.23     2371.8    42810.6    47460.4    52110.4    70678.5   213899.6   358765.2   491653.8     6668.2    29223.0    43446.6    55358.4       1.74      20.89      24.20      27.71
 HCFC-142b        2014.0    47460.4   361646.1    43427.1      25.46     2371.8    42810.6    47460.4    52110.4    75248.7   209481.0   362954.3   505434.0     6151.8    30250.4    43843.7    54313.7       2.06      21.45      25.45      29.57
 HCFC-142b        2015.0    36303.7   365679.4    42448.9      26.64     1814.2    32747.0    36303.7    39860.6    79595.3   205883.3   366751.9   518872.5     5365.7    30557.7    42969.3    51504.5       2.35      22.04      26.64      31.27
 HCFC-142b        2016.0    36303.7   359534.2    41614.8      27.71     1814.2    32747.0    36303.7    39860.6    83274.5   193930.4   360103.5   521393.0     4740.3    30840.7    42166.1    49383.6       2.57      22.60      27.72      32.75
 HCFC-142b        2017.0    36303.7   354223.2    40900.7      28.66     1814.2    32747.0    36303.7    39860.6    86432.4   184267.6   354139.9   524074.4     4236.8    31097.3    41434.3    47758.1       2.76      23.16      28.69      34.03
 HCFC-142b        2018.0    36303.7   349626.2    40287.8      29.53     1814.2    32747.0    36303.7    39860.6    89151.9   176436.3   348830.1   527026.6     3828.2    31342.0    40772.4    46455.1       2.91      23.68      29.57      35.17
 HCFC-142b        2019.0    36303.7   345642.1    39760.5      30.31     1814.2    32747.0    36303.7    39860.6    91503.1   170277.9   344107.6   529993.6     3494.7    31567.4    40185.4    45411.6       3.04      24.18      30.36      36.19
 HCFC-142b        2020.0    22771.9   342185.3    37781.5      31.02     1138.0    20540.9    22771.9    25003.0    93544.6   165233.2   339823.7   532911.2     2948.6    30922.8    38084.0    42643.7       3.15      24.66      31.07      37.12
 HCFC-142b        2021.0    22771.9   327175.7    36056.3      31.58     1138.0    20540.9    22771.9    25003.0    94820.1   150446.7   323917.6   522783.8     2584.0    30212.3    36271.5    40445.5       3.23      25.08      31.62      37.85
 HCFC-142b        2022.0    22771.9   313891.3    34547.8      32.00     1138.0    20540.9    22771.9    25003.0    95536.7   138531.8   309708.9   513142.5     2346.2    29385.9    34716.2    38624.5       3.29      25.41      32.03      38.41
 HCFC-142b        2023.0    22771.9   302115.3    33225.9      32.32     1138.0    20540.9    22771.9    25003.0    95821.0   129110.6   297013.7   504301.8     2192.0    28466.7    33368.2    37088.5       3.33      25.67      32.34      38.84
 HCFC-142b        2024.0    22771.9   291661.2    32065.1      32.54     1138.0    20540.9    22771.9    25003.0    95773.1   121519.8   285670.8   496072.1     2089.1    27542.7    32194.8    35771.0       3.36      25.89      32.54      39.18
 HCFC-142b        2025.0    11514.1   282368.0    29775.7      32.69      575.4    10386.1    11514.1    12642.2    95471.7   115466.7   275538.6   488429.7     2165.6    24861.1    29971.9    33435.8       3.39      26.02      32.66      39.44
[truncated: 358,371 more chars]
