# Supplementary material for: Uncertainty analysis of projections of ozone-depleting substances: mixing ratios, EESC, ODPs, and GWPs
Source: Copernicus journal article supplement (doi:10.5194/acp-14-2757-2014), 2014-03-17
Supplement: Supplementary file 2 [file acp-14-2757-2014-supplement.zip › All_parameters_SPARC2013_possible_mc.dat]

 Monte_Carlo_runs:     250000
 Lifetimes:            SPARC2013
 Uncertainty_lifetime: Large
 Trend_in_lifetimes:   No
 Emission_fractions:   Calculated
 Production_CCl4:      Calculated
 Fraction_release:     Newman
 Age-of-air:           Spectrum
 Sampling_method:      Latin_Hypercube
 
 File_Parameters:      Parameters.dat
 File_Mixing_ratios:   Observations_WMO2010.dat
 File_Bank:            Bank_WMO2010.dat
 File_Production:      Production_WMO2010.dat
 
 Guus_Velders_(RIVM), Sun Jul 21 14:46:27 2013
 
 Emission_frac    Efrac_mean  Efrac_stdv  Efrac_2.5p   Efrac_50p Efrac_97.5p
 CFC-11              0.04042     0.01747     0.01098     0.03874     0.07974
 CFC-12              0.14646     0.02147     0.10686     0.14557     0.19098
 CFC-113             0.14585     0.06517     0.02706     0.14157     0.28338
 CFC-114             0.10323     0.02711     0.05697     0.10084     0.16326
 CFC-115             0.08105     0.01023     0.06220     0.08063     0.10240
 CCl4                1.00000     0.00000     1.00000     1.00000     1.00000
 CH3CCl3             1.00000     0.00000     1.00000     1.00000     1.00000
 HCFC-22             0.20123     0.04856     0.14032     0.19457     0.29874
 HCFC-141b           0.06909     0.03390     0.03320     0.06345     0.13500
 HCFC-142b           0.11246     0.03818     0.05808     0.10666     0.20114
 Halon-1211          0.07580     0.02517     0.03370     0.07338     0.13190
 Halon-1202          1.00000     0.00000     1.00000     1.00000     1.00000
 Halon-1301          0.03940     0.01179     0.02055     0.03798     0.06650
 Halon-2402          0.04420     0.01532     0.01948     0.04248     0.07912
 CH3Br               1.00000     0.00000     1.00000     1.00000     1.00000
 CH3Cl               1.00000     0.00000     1.00000     1.00000     1.00000
 
 Species            Year  Prod_mean  Bank_mean  Emis_mean   Mix_mean  Prod_stdv  Prod_2.5p   Prod_50p Prod_97.5p  Bank_stdv  Bank_2.5p   Bank_50p Bank_97.5p  Emis_stdv  Emis_2.5p   Emis_50p Emis_97.5p   Mix_stdv   Mix_2.5p    Mix_50p  Mix_97.5p
 CFC-11           1950.0     6623.0   900425.8    14091.1       0.39      331.0     5974.1     6623.0     7271.9   993093.6 -1030247.5   894441.8  2865535.0      428.7    13287.3    14078.6    14967.1       0.00       0.39       0.39       0.39
 CFC-11           1951.0     9072.0   892957.7     8087.6       1.00      453.4     8183.2     9072.0     9960.8   992768.0 -1037222.1   886943.8  2857358.3      267.4     7583.5     8079.6     8631.9       0.00       1.00       1.00       1.00
 CFC-11           1952.0    13562.0   893942.1    11646.7       1.33      677.7    12233.3    13562.0    14890.7   992397.4 -1035511.1   887982.9  2857668.0      381.1    10928.4    11635.4    12422.8       0.00       1.33       1.33       1.33
 CFC-11           1953.0    17282.0   895857.3    15856.1       1.82      863.6    15588.8    17282.0    18975.2   991860.0 -1032555.6   889985.9  2858478.5      518.9    14878.1    15840.6    16912.7       0.00       1.82       1.82       1.82
 CFC-11           1954.0    20911.0   897283.2    19680.0       2.48     1045.0    18862.3    20911.0    22959.7   991157.0 -1030005.1   891404.9  2858562.5      652.6    18449.3    19660.5    21007.7       0.00       2.48       2.48       2.48
 CFC-11           1955.0    26263.0   898514.3    24372.6       3.29     1312.4    23690.0    26263.0    28836.1   990281.5 -1026981.3   892741.6  2857895.8      817.4    22831.5    24348.5    26033.3       0.00       3.29       3.29       3.29
 CFC-11           1956.0    32477.0   900404.7    30383.7       4.30     1623.0    29295.2    32477.0    35658.9   989173.0 -1022938.0   894627.8  2857774.5     1027.2    28446.9    30353.9    32470.3       0.00       4.30       4.30       4.30
 CFC-11           1957.0    33929.0   902498.1    33988.3       5.55     1695.5    30604.9    33929.0    37253.1   987784.7 -1018185.6   896640.6  2856540.0     1182.7    31755.8    33954.9    36388.8       0.00       5.55       5.55       5.55
 CFC-11           1958.0    29529.0   902438.7    31756.1       6.93     1475.7    26636.0    29529.0    32422.1   986235.6 -1015168.8   896723.9  2853039.5     1197.2    29488.4    31726.7    34184.6       0.00       6.93       6.93       6.93
 CFC-11           1959.0    35562.0   900211.6    32451.8       8.19     1777.2    32077.9    35562.0    39046.1   984711.0 -1014423.3   894475.1  2847653.0     1289.5    30002.6    32420.3    35061.6       0.00       8.19       8.19       8.19
 CFC-11           1960.0    49714.0   903321.8    42689.1       9.45     2484.4    44843.4    49714.0    54584.7   982944.5 -1007736.6   897699.0  2847235.5     1617.3    39623.3    42649.0    45970.0       0.00       9.45       9.45       9.45
 CFC-11           1961.0    60464.0   910346.7    54951.2      11.14     3021.6    54540.2    60464.0    66387.9   980652.9  -996034.3   904819.8  2849932.0     2024.0    51121.2    54900.3    59057.9       0.00      11.14      11.14      11.14
 CFC-11           1962.0    78109.0   915859.5    68956.5      13.33     3903.4    70456.5    78109.0    85761.6   977867.9  -984822.9   910388.9  2850280.0     2505.0    64217.7    68890.1    74036.6       0.00      13.33      13.33      13.33
 CFC-11           1963.0    93304.0   925012.0    84422.7      16.10     4662.7    84162.8    93304.1   102445.3   974377.3  -968957.3   919508.3  2852941.0     3054.8    78645.3    84342.0    90615.8       0.00      16.10      16.10      16.10
 CFC-11           1964.0   111085.0   933893.3   100186.7      19.49     5551.3   100201.7   111085.1   121968.4   970187.7  -951744.3   928543.4  2853337.8     3645.6    93291.0   100090.5   107579.9       0.00      19.49      19.49      19.49
 CFC-11           1965.0   122833.0   944791.6   114123.7      23.50     6138.4   110798.8   122833.1   134867.4   965196.8  -931332.8   939450.8  2854116.5     4223.8   106128.3   114018.3   122694.1       0.00      23.50      23.50      23.50
 CFC-11           1966.0   141022.0   953500.9   127686.2      28.05     7047.3   127205.7   141022.1   154838.4   959522.0  -911226.4   948324.9  2850945.8     4824.8   118544.7   127566.5   137476.0       0.00      28.05      28.05      28.05
 CFC-11           1967.0   159756.0   966836.8   144835.2      33.10     7983.5   144104.3   159756.1   175407.9   952987.5  -885042.1   961964.8  2850693.5     5547.8   134324.2   144697.2   156084.4       0.00      33.10      33.10      33.10
 CFC-11           1968.0   183116.0   981757.6   164910.9      38.81     9150.9   165175.7   183116.1   201056.5   945520.6  -855670.3   977082.7  2851412.8     6383.3   152804.6   164754.1   177847.7       0.00      38.81      38.81      38.81
 CFC-11           1969.0   218271.0   999962.6   191392.1      45.29    10907.7   196886.5   218271.2   239655.8   936956.6  -820745.0   995584.6  2853144.5     7423.1   177311.0   191209.1   206432.7       0.00      45.29      45.29      45.29
 CFC-11           1970.0   240136.0  1026841.5   217482.2      52.81    12000.4   216609.3   240136.2   263663.0   926942.2  -774555.1  1022735.8  2860253.8     8516.0   201323.4   217270.3   234731.4       0.00      52.81      52.81      52.81
 CFC-11           1971.0   266175.0  1049495.3   238920.4      61.32    13301.6   240097.2   266175.2   292253.1   915725.3  -730198.8  1045765.3  2860726.3     9559.9   220758.5   238686.2   258265.9       0.00      61.32      61.32      61.32
 CFC-11           1972.0   310856.0  1076750.0   269407.1      70.61    15534.5   280400.7   310856.2   341311.7   903212.3  -678029.6  1072843.8  2864136.5    10872.1   248748.8   269142.7   291405.1       0.00      70.61      70.61      70.61
 CFC-11           1973.0   353985.0  1118198.9   308469.8      81.06    17689.8   319304.3   353985.2   388666.2   888920.0  -609525.3  1114074.5  2875927.5    12461.8   284792.4   308165.9   333677.3       0.00      81.06      81.06      81.06
 CFC-11           1974.0   377024.0  1163714.0   339495.4      93.02    18841.1   340086.1   377024.3   413962.4   872795.1  -533314.8  1160090.0  2888863.5    13959.2   312968.4   339163.4   367711.8       0.00      93.02      93.02      93.02
 CFC-11           1975.0   323968.0  1201242.6   328483.7     106.11    16189.8   292228.1   323968.2   355708.3   855267.4  -462009.3  1197616.8  2892689.3    14592.8   300666.5   328165.6   357887.8       0.00     106.11     106.11     106.11
 CFC-11           1976.0   352032.0  1196727.0   335152.5     118.47    17592.2   317542.6   352032.2   386521.8   838054.3  -433415.7  1193572.0  2853344.3    15616.2   305327.6   334830.6   366592.7       0.00     118.47     118.47     118.47
 CFC-11           1977.0   332964.0  1213606.5   321797.4     130.89    16639.3   300342.7   332964.2   365585.7   819516.6  -380704.8  1210552.0  2831561.8    16271.1   290656.9   321490.0   354450.7       0.00     130.89     130.89     130.89
 CFC-11           1978.0   322952.0  1224773.1   305739.7     142.48    16139.0   291311.6   322952.2   354592.8   800674.3  -333213.8  1221796.1  2805414.3    16874.1   273359.8   305459.0   339504.0       0.00     142.48     142.48     142.48
 CFC-11           1979.0   306983.0  1241985.4   265857.1     153.15    15341.0   276907.2   306983.2   337059.2   781423.2  -278584.1  1238724.3  2784272.5    17070.1   232994.7   265617.6   299947.5       0.00     153.15     153.15     153.15
 CFC-11           1980.0   310019.0  1283111.3   263017.2     161.87    15492.7   279645.7   310019.2   340392.7   762087.9  -200205.4  1280034.0  2787477.8    17762.8   228804.4   262801.5   298416.9       0.00     161.87     161.87     161.87
 CFC-11           1981.0   310043.0  1330113.1   276310.1     170.30    15493.9   279667.3   310043.2   340419.0   742225.9  -114274.9  1327086.6  2794893.5    18681.7   240325.3   276084.6   313536.3       0.00     170.30     170.30     170.30
 CFC-11           1982.0   310055.0  1363846.0   266002.6     179.15    15494.5   279678.2   310055.2   340432.2   721809.2   -40931.4  1361322.9  2786991.8    19288.8   228812.7   265799.5   304384.4       0.00     179.15     179.15     179.15
 CFC-11           1983.0   332168.0  1407898.4   278816.7     187.38    16599.5   299624.7   332168.2   364711.7   700989.9    43450.7  1405078.0  2789981.0    20183.6   239898.7   278604.9   318982.5       0.00     187.38     187.38     187.38
 CFC-11           1984.0   354629.0  1461249.8   298625.3     196.02    17722.0   319885.2   354629.2   389373.3   679383.8   139038.9  1459041.3  2801476.8    21214.4   257730.5   298390.6   340846.2       0.00     196.02     196.02     196.02
 CFC-11           1985.0   370925.0  1517253.4   328363.4     205.36    18536.4   334584.6   370925.3   407265.8   656997.2   238530.6  1514798.9  2813654.5    22454.6   285106.4   328089.8   373111.2       0.00     205.36     205.36     205.36
 CFC-11           1986.0   390257.8  1559815.0   348561.8     215.82    19502.5   352023.3   390258.0   428492.7   633897.8   325971.3  1557327.3  2810257.0    23651.0   302999.5   348273.7   395692.8       0.00     215.82     215.82     215.82
 CFC-11           1987.0   378171.8  1601511.0   350103.8     226.97    18898.5   341121.4   378172.1   415222.7   610148.4   413313.3  1599573.6  2804582.3    24627.1   302633.5   349826.5   399156.5       0.00     226.97     226.97     226.97
 CFC-11           1988.0   366085.9  1629579.0   325892.5     237.97    18294.5   330219.6   366086.2   401952.7   586240.8   487830.5  1627953.3  2785162.3    25239.5   277223.1   325649.8   376075.1       0.00     237.97     237.97     237.97
 CFC-11           1989.0   354000.0  1669772.5   301539.4     247.71    17690.6   319317.8   354000.2   388682.7   562361.7   574374.2  1667727.8  2777692.8    25781.6   251760.1   301312.4   352741.5       0.00     247.71     247.71     247.71
 CFC-11           1990.0   264117.2  1722233.1   249735.9     256.19    13198.8   238241.0   264117.4   289993.7   538643.4   672600.5  1720209.3  2782853.8    25945.6   199586.2   249562.7   301139.0       0.00     256.19     256.19     256.19
 CFC-11           1991.0   244683.9  1736614.5   181971.1     262.24    12227.7   220711.6   244684.0   268656.4   515769.5   730834.8  1734819.6  2752535.3    25858.2   131952.5   181873.7   233037.4       0.00     262.24     262.24     262.24
 CFC-11           1992.0   217765.9  1799327.2   174495.8     265.21    10882.5   196430.8   217766.0   239101.2   493442.0   837813.6  1797712.4  2770181.0    26073.0   124019.4   174391.3   225961.5       0.00     265.21     265.21     265.21
 CFC-11           1993.0   175152.7  1842597.2   115789.2     267.80     8753.0   157992.5   175152.8   192313.0   471691.7   923561.3  1841388.5  2770901.5    25901.4    65535.8   115735.9   166722.5       0.00     267.80     267.80     267.80
 CFC-11           1994.0    99738.0  1901960.7   107495.4     267.77     4984.2    89966.4    99738.1   109509.7   450798.2  1023796.6  1900458.9  2787848.8    25849.1    57312.8   107444.1   158292.9       0.00     267.77     267.77     267.77
 CFC-11           1995.0    72593.3  1894203.4   103276.9     267.37     3627.7    65481.2    72593.4    79705.6   430828.7  1054514.6  1893069.8  2740341.0    25787.6    53193.2   103227.6   153940.0       0.00     267.37     267.37     267.37
 CFC-11           1996.0    55828.0  1863519.8    98110.7     266.80     2789.9    50358.4    55828.1    61297.7   411671.0  1061087.4  1862102.5  2671796.5    25704.5    48185.0    98062.0   148618.3       0.00     266.80     266.80     266.80
 CFC-11           1997.0    62472.7  1821237.2    81256.0     266.01     3122.0    56352.1    62472.7    68593.3   393389.0  1055099.1  1820336.0  2593768.8    25530.1    31596.9    81210.1   131451.5       0.00     266.01     266.01     266.01
 CFC-11           1998.0    54269.1  1802453.8    87496.1     264.50     2712.0    48952.3    54269.2    59586.1   376086.7  1069592.8  1801520.8  2541950.5    25427.4    38073.9    87445.8   137480.7       0.01     264.50     264.50     264.50
 CFC-11           1999.0    53986.1  1769226.9    78323.1     263.30     2697.9    48696.9    53986.1    59275.3   359869.5  1068215.5  1768286.0  2476454.5    25254.5    29202.3    78281.3   127978.6       0.02     263.30     263.30     263.30
 CFC-11           2000.0    44023.9  1744889.9    77297.2     261.71     2200.0    39710.8    44024.0    48337.1   344878.6  1071919.0  1744374.8  2421964.5    25098.1    28472.9    77253.3   126648.2       0.03     261.71     261.71     261.71
 CFC-11           2001.0    32184.2  1711616.7    71602.4     260.11     1608.4    29031.0    32184.2    35337.4   331245.5  1065471.5  1711684.8  2361780.8    24897.9    23107.1    71549.2   120610.5       0.04     260.11     260.11     260.11
 CFC-11           2002.0    31822.8  1672198.5    58384.7     258.29     1590.3    28705.1    31822.9    34940.6   319114.9  1049667.3  1672240.1  2299050.5    24514.3    10263.6    58275.9   106834.8       0.06     258.29     258.29     258.29
 CFC-11           2003.0    25443.8  1645636.7    66087.3     255.93     1271.5    22951.0    25443.8    27936.6   308673.3  1043362.6  1645674.8  2251860.0    24444.8    18396.7    66022.7   114239.5       0.09     255.92     255.92     255.92
 CFC-11           2004.0    22276.9  1604993.1    56447.3     253.94     1113.3    20094.4    22276.9    24459.4   299909.0  1019468.1  1604990.1  2193459.8    24076.4     9132.2    56329.5   104059.6       0.12     253.94     253.94     253.94
 CFC-11           2005.0    13834.8  1570822.7    59641.9     251.58      691.4    12479.3    13834.8    15190.2   293021.7   998477.6  1570772.4  2145252.0    23939.6    12778.1    59552.3   106886.9       0.16     251.57     251.57     251.57
 CFC-11           2006.0    10714.2  1525015.6    58009.8     249.40      535.4     9664.5    10714.2    11763.9   288013.5   961626.1  1524766.3  2090127.0    23708.3    11555.4    57916.9   104823.1       0.19     249.39     249.39     249.39
 CFC-11           2007.0     2662.8  1477720.0    60365.8     247.19      133.1     2401.9     2662.8     2923.6   284956.0   919463.3  1477588.4  2036940.3    23555.0    14300.9    60281.2   106812.4       0.23     247.17     247.17     247.17
 CFC-11           2008.0     1206.6  1420017.0    65640.9     245.12       60.3     1088.4     1206.6     1324.8   283852.3   863528.8  1420020.0  1976515.6    23441.7    19948.8    65586.8   111800.8       0.26     245.11     245.11     245.11
 CFC-11           2009.0     2058.3  1355582.6    52473.6     243.33      102.9     1856.6     2058.3     2260.0   284692.1   797187.1  1355297.5  1913760.8    19661.3    15784.7    51685.0    93401.5       0.28     243.31     243.31     243.31
 CFC-11           2010.0     2366.0  1305167.3    50169.6     240.99      118.2     2134.2     2366.0     2597.8   284394.9   748707.5  1304251.4  1864350.4    18130.2    15622.1    49674.4    87300.8       0.68     239.60     241.06     241.97
 CFC-11           2011.0        0.0  1257363.7    47890.7     238.60        0.0        0.0        0.0        0.0   284853.4   702325.1  1255865.3  1819462.5    16701.7    15424.2    47627.8    81536.5       1.22     235.88     238.75     240.48
 CFC-11           2012.0        0.0  1209473.1    45730.0     236.16        0.0        0.0        0.0        0.0   285813.5   654553.1  1206990.0  1775890.1    15401.0    15240.5    45665.0    76325.8       1.77     232.14     236.40     238.89
 CFC-11           2013.0        0.0  1163743.1    43680.6     233.67        0.0        0.0        0.0        0.0   287090.2   609455.7  1160136.5  1735666.9    14217.3    15054.3    43773.2    71532.7       2.32     228.37     233.98     237.22
 CFC-11           2014.0        0.0  1120062.5    41736.1     231.14        0.0        0.0        0.0        0.0   288538.0   567302.4  1115426.1  1698393.5    13141.2    14871.8    41938.2    67163.1       2.87     224.58     231.53     235.50
 CFC-11           2015.0        0.0  1078326.4    39890.5     228.57        0.0        0.0        0.0        0.0   290044.6   527199.2  1072184.5  1662758.4    12164.1    14675.5    40177.0    63156.3       3.41     220.78     229.04     233.75
 CFC-11           2016.0        0.0  1038435.9    38138.1     225.98        0.0        0.0        0.0        0.0   291525.2   489283.4  1030562.9  1628843.0    11277.9    14491.9    38470.7    59462.1       3.96     216.98     226.50     231.98
 CFC-11           2017.0        0.0  1000297.9    36473.6     223.35        0.0        0.0        0.0        0.0   292916.9   454427.9   991030.2  1598228.0    10475.5    14303.7    36849.1    56108.1       4.51     213.15     223.94     230.18
 CFC-11           2018.0        0.0   963824.3    34892.0     220.71        0.0        0.0        0.0        0.0   294174.5   421585.5   952569.3  1568527.4     9750.2    14096.5    35272.3    52996.3       5.05     209.31     221.35     228.38
 CFC-11           2019.0        0.0   928932.3    33388.8     218.06        0.0        0.0        0.0        0.0   295266.6   390689.8   915898.9  1539992.5     9095.8    13878.0    33774.5    50198.5       5.60     205.48     218.74     226.59
 CFC-11           2020.0        0.0   895543.5    31959.6     215.38        0.0        0.0        0.0        0.0   296172.7   361782.8   880859.6  1513362.3     8506.7    13644.8    32344.6    47617.4       6.14     201.65     216.12     224.80
 CFC-11           2021.0        0.0   863583.9    30600.3     212.70        0.0        0.0        0.0        0.0   296880.6   334892.3   846911.6  1488309.8     7977.5    13366.3    30978.2    45219.9       6.69     197.81     213.47     223.01
 CFC-11           2022.0        0.0   832983.6    29307.0     210.02        0.0        0.0        0.0        0.0   297384.4   309498.8   814217.2  1463963.4     7503.3    13099.9    29658.5    43026.6       7.23     193.99     210.82     221.23
 CFC-11           2023.0        0.0   803676.6    28076.1     207.33        0.0        0.0        0.0        0.0   297683.4   286082.9   782735.2  1440385.1     7079.4    12823.6    28407.7    41014.6       7.77     190.18     208.15     219.46
 CFC-11           2024.0        0.0   775600.5    26904.4     204.64        0.0        0.0        0.0        0.0   297780.2   264110.6   752392.7  1418514.3     6701.3    12495.5    27222.7    39134.8       8.31     186.38     205.49     217.70
 CFC-11           2025.0        0.0   748696.1    25788.5     201.95        0.0        0.0        0.0        0.0   297680.2   243822.6   723527.8  1397557.8     6364.9    12118.6    26092.0    37358.6       8.85     182.61     202.82     215.96
 CFC-11           2026.0        0.0   722907.6    24725.6     199.27        0.0        0.0        0.0        0.0   297390.8   224918.3   695792.2  1376355.3     6066.2    11691.0    25017.6    35739.3       9.38     178.84     200.15     214.22
 CFC-11           2027.0        0.0   698182.0    23712.7     196.59        0.0        0.0        0.0        0.0   296920.7   207529.2   668720.5  1356527.8     5801.4    11228.8    23993.0    34234.2       9.90     175.13     197.48     212.49
 CFC-11           2028.0        0.0   674469.3    22747.3     193.92        0.0        0.0        0.0        0.0   296279.4   191399.5   642775.9  1336371.5     5567.0    10761.5    23020.9    32854.2      10.42     171.43     194.81     210.77
 CFC-11           2029.0        0.0   651722.1    21826.8     191.27        0.0        0.0        0.0        0.0   295477.0   176470.4   617860.4  1317047.8     5359.7    10227.9    22098.5    31545.7      10.93     167.77     192.16     209.06
 CFC-11           2030.0        0.0   629895.3    20948.9     188.62        0.0        0.0        0.0        0.0   294523.9   162799.5   594023.3  1299106.3     5176.3     9683.4    21220.8    30328.7      11.44     164.15     189.51     207.36
 CFC-11           2031.0        0.0   608946.4    20111.4     185.99        0.0        0.0        0.0        0.0   293430.5   150098.6   571054.8  1281768.0     5014.0     9189.3    20387.3    29165.3      11.93     160.56     186.88     205.67
 CFC-11           2032.0        0.0   588835.0    19312.3     183.38        0.0        0.0        0.0        0.0   292207.1   138461.5   548882.8  1263246.9     4870.0     8685.7    19593.1    28082.0      12.42     157.01     184.25     203.98
 CFC-11           2033.0        0.0   569522.7    18549.4     180.78        0.0        0.0        0.0        0.0   290863.9   127674.6   527627.5  1246360.5     4742.0     8162.5    18834.2    27073.3      12.90     153.52     181.63     202.32
 CFC-11           2034.0        0.0   550973.3    17821.1     178.20        0.0        0.0        0.0        0.0   289410.6   117790.4   507145.5  1230391.9     4627.8     7628.3    18115.6    26120.8      13.36     150.06     179.04     200.67
 CFC-11           2035.0        0.0   533152.2    17125.5     175.64        0.0        0.0        0.0        0.0   287856.7   108609.9   487658.9  1214052.9     4525.4     7146.2    17424.5    25222.1      13.82     146.66     176.46     199.03
 CFC-11           2036.0        0.0   516026.6    16461.0     173.10        0.0        0.0        0.0        0.0   286211.3   100085.2   468707.8  1197771.9     4433.1     6686.3    16765.9    24367.7      14.27     143.32     173.90     197.39
 CFC-11           2037.0        0.0   499565.6    15826.1     170.58        0.0        0.0        0.0        0.0   284483.0    92297.8   450648.1  1181832.6     4349.3     6230.1    16136.1    23567.0      14.70     140.02     171.35     195.77
 CFC-11           2038.0        0.0   483739.5    15219.2     168.09        0.0        0.0        0.0        0.0   282679.9    85088.8   433271.2  1166757.4     4272.8     5806.9    15532.5    22811.9      15.13     136.79     168.83     194.15
 CFC-11           2039.0        0.0   468520.3    14639.0     165.61        0.0        0.0        0.0        0.0   280809.8    78349.7   416484.0  1151624.0     4202.2     5410.2    14957.4    22098.4      15.54     133.60     166.32     192.57
 CFC-11           2040.0        0.0   453881.3    14084.2     163.16        0.0        0.0        0.0        0.0   278880.0    72229.3   400358.7  1137011.6     4136.7     5032.3    14405.9    21410.7      15.94     130.48     163.83     190.98
 CFC-11           2041.0        0.0   439797.1    13553.4     160.74        0.0        0.0        0.0        0.0   276897.4    66635.0   384863.1  1123370.4     4075.3     4672.1    13874.5    20764.5      16.33     127.40     161.36     189.39
 CFC-11           2042.0        0.0   426243.7    13045.6     158.34        0.0        0.0        0.0        0.0   274868.4    61337.5   369928.4  1108597.9     4017.4     4341.1    13362.1    20145.9      16.71     124.38     158.90     187.82
 CFC-11           2043.0        0.0   413198.1    12559.7     155.96        0.0        0.0        0.0        0.0   272799.1    56553.7   355710.1  1094663.0     3962.3     4032.1    12873.3    19560.3      17.07     121.41     156.49     186.25
 CFC-11           2044.0        0.0   400638.4    12094.5     153.61        0.0        0.0        0.0        0.0   270695.0    52126.3   341917.8  1081229.0     3909.5     3730.2    12401.1    19001.7      17.43     118.49     154.09     184.70
 CFC-11           2045.0        0.0   388543.9    11649.1     151.28        0.0        0.0        0.0        0.0   268561.4    48085.1   328670.3  1067849.1     3858.6     3455.0    11951.9    18472.6      17.77     115.64     151.71     183.16
 CFC-11           2046.0        0.0   376894.8    11222.5     148.98        0.0        0.0        0.0        0.0   266403.1    44271.0   315962.0  1054549.3     3809.2     3198.6    11517.1    17967.7      18.10     112.86     149.37     181.64
 CFC-11           2047.0        0.0   365672.3    10813.9     146.71        0.0        0.0        0.0        0.0   264224.8    40780.4   303850.1  1042265.2     3761.0     2959.7    11100.9    17482.1      18.42     110.13     147.04     180.12
 CFC-11           2048.0        0.0   354858.4    10422.4     144.47        0.0        0.0        0.0        0.0   262030.6    37561.6   292065.6  1029807.1     3713.8     2736.4    10695.0    17013.5      18.73     107.46     144.73     178.62
 CFC-11           2049.0        0.0   344436.1    10047.1     142.25        0.0        0.0        0.0        0.0   259824.5    34600.0   280820.5  1017354.8     3667.4     2530.4    10305.9    16571.2      19.02     104.83     142.45     177.12
 CFC-11           2050.0        0.0   334388.9     9687.4     140.06        0.0        0.0        0.0        0.0   257609.9    31866.6   269984.4  1005105.9     3621.6     2339.4     9933.5    16147.7      19.30     102.25     140.19     175.65
 CFC-11           2051.0        0.0   324701.5     9342.6     137.89        0.0        0.0        0.0        0.0   255390.3    29350.4   259584.2   993211.1     3576.3     2162.0     9574.2    15740.8      19.58      99.72     137.96     174.18
 CFC-11           2052.0        0.0   315358.9     9011.8     135.75        0.0        0.0        0.0        0.0   253168.7    27035.1   249524.3   980859.0     3531.4     1994.6     9225.6    15349.6      19.84      97.25     135.76     172.72
 CFC-11           2053.0        0.0   306347.1     8694.5     133.64        0.0        0.0        0.0        0.0   250947.9    24869.8   239900.8   969091.7     3486.8     1841.2     8886.9    14979.5      20.08      94.84     133.58     171.27
 CFC-11           2054.0        0.0   297652.6     8390.1     131.56        0.0        0.0        0.0        0.0   248730.6    22906.2   230662.0   957690.9     3442.6     1700.2     8560.0    14623.2      20.32      92.48     131.43     169.82
 CFC-11           2055.0        0.0   289262.5     8098.0     129.51        0.0        0.0        0.0        0.0   246519.0    21106.5   221723.5   946439.1     3398.5     1570.9     8246.6    14279.0      20.55      90.15     129.31     168.38
 CFC-11           2056.0        0.0   281164.5     7817.6     127.48        0.0        0.0        0.0        0.0   244315.4    19430.9   213121.8   935838.5     3354.7     1449.2     7941.2    13949.9      20.77      87.90     127.20     166.96
 CFC-11           2057.0        0.0   273346.9     7548.3     125.48        0.0        0.0        0.0        0.0   242121.7    17879.7   204938.6   924266.4     3311.1     1337.4     7650.5    13632.3      20.97      85.68     125.13     165.55
 CFC-11           2058.0        0.0   265798.6     7289.8     123.50        0.0        0.0        0.0        0.0   239939.8    16470.0   197022.4   913977.9     3267.7     1234.1     7368.3    13320.9      21.17      83.54     123.09     164.16
 CFC-11           2059.0        0.0   258508.8     7041.5     121.56        0.0        0.0        0.0        0.0   237771.3    15162.5   189445.3   903177.1     3224.5     1138.5     7092.3    13022.4      21.35      81.41     121.07     162.77
 CFC-11           2060.0        0.0   251467.3     6802.9     119.64        0.0        0.0        0.0        0.0   235617.6    13976.8   182071.5   892612.1     3181.4     1050.4     6827.1    12737.3      21.52      79.34     119.06     161.39
 CFC-11           2061.0        0.0   244664.3     6573.7     117.75        0.0        0.0        0.0        0.0   233480.3    12863.0   175044.9   882360.0     3138.6      968.5     6572.8    12460.4      21.69      77.33     117.09     160.01
 CFC-11           2062.0        0.0   238090.6     6353.4     115.88        0.0        0.0        0.0        0.0   231360.4    11848.1   168268.7   872144.4     3096.0      893.0     6326.7    12195.6      21.84      75.37     115.15     158.65
 CFC-11           2063.0        0.0   231737.2     6141.6     114.04        0.0        0.0        0.0        0.0   229259.0    10905.6   161733.6   861709.7     3053.6      823.5     6090.4    11940.3      21.99      73.45     113.24     157.30
 CFC-11           2064.0        0.0   225595.5     5938.0     112.23        0.0        0.0        0.0        0.0   227177.1    10042.9   155457.0   852342.3     3011.5      759.6     5861.7    11693.7      22.13      71.57     111.35     155.95
 CFC-11           2065.0        0.0   219657.5     5742.2     110.44        0.0        0.0        0.0        0.0   225115.7     9258.5   149428.5   842270.3     2969.6      700.4     5640.0    11456.1      22.25      69.74     109.49     154.62
 CFC-11           2066.0        0.0   213915.3     5553.9     108.68        0.0        0.0        0.0        0.0   223075.4     8531.1   143658.3   832628.6     2928.0      645.3     5426.1    11223.0      22.37      67.97     107.65     153.30
 CFC-11           2067.0        0.0   208361.4     5372.7     106.95        0.0        0.0        0.0        0.0   221057.0     7854.6   138049.0   823200.1     2886.7      593.5     5219.7    11001.0      22.48      66.22     105.84     151.99
 CFC-11           2068.0        0.0   202988.7     5198.3     105.24        0.0        0.0        0.0        0.0   219061.0     7235.8   132708.1   813517.5     2845.7      547.7     5021.1    10786.6      22.58      64.52     104.06     150.68
 CFC-11           2069.0        0.0   197790.4     5030.5     103.55        0.0        0.0        0.0        0.0   217088.0     6661.5   127571.5   804517.4     2805.0      505.2     4830.6    10579.1      22.67      62.85     102.30     149.38
 CFC-11           2070.0        0.0   192759.8     4869.0     101.89        0.0        0.0        0.0        0.0   215138.3     6132.4   122637.9   795127.3     2764.6      465.1     4647.1    10380.5      22.76      61.23     100.56     148.11
 CFC-11           2071.0        0.0   187890.8     4713.5     100.26        0.0        0.0        0.0        0.0   213212.5     5646.3   117907.2   786075.4     2724.7      428.4     4470.3    10177.7      22.84      59.66      98.85     146.85
 CFC-11           2072.0        0.0   183177.3     4563.8      98.65        0.0        0.0        0.0        0.0   211310.7     5196.1   113352.7   777292.1     2685.0      394.6     4299.9     9980.6      22.90      58.11      97.17     145.60
 CFC-11           2073.0        0.0   178613.5     4419.5      97.06        0.0        0.0        0.0        0.0   209433.2     4781.9   108953.4   768127.1     2645.8      363.4     4136.7     9791.8      22.97      56.61      95.51     144.35
 CFC-11           2074.0        0.0   174194.0     4280.6      95.50        0.0        0.0        0.0        0.0   207580.3     4400.1   104739.7   759094.3     2607.0      334.5     3980.0     9609.8      23.02      55.14      93.88     143.08
 CFC-11           2075.0        0.0   169913.4     4146.7      93.97        0.0        0.0        0.0        0.0   205752.1     4053.1   100691.7   750812.9     2568.5      308.4     3828.7     9435.7      23.07      53.70      92.26     141.84
 CFC-11           2076.0        0.0   165766.7     4017.7      92.45        0.0        0.0        0.0        0.0   203948.6     3734.3    96812.8   742296.6     2530.5      284.0     3682.5     9259.7      23.11      52.30      90.68     140.63
 CFC-11           2077.0        0.0   161748.9     3893.4      90.96        0.0        0.0        0.0        0.0   202170.0     3441.7    93058.3   733923.4     2493.0      261.7     3542.5     9095.7      23.14      50.94      89.12     139.41
 CFC-11           2078.0        0.0   157855.6     3773.5      89.49        0.0        0.0        0.0        0.0   200416.2     3168.0    89443.5   725696.1     2455.8      241.0     3406.7     8935.7      23.17      49.62      87.58     138.20
 CFC-11           2079.0        0.0   154082.0     3658.0      88.05        0.0        0.0        0.0        0.0   198687.4     2920.3    85968.4   717224.5     2419.1      222.1     3276.6     8778.2      23.19      48.32      86.06     136.99
 CFC-11           2080.0        0.0   150424.1     3546.5      86.63        0.0        0.0        0.0        0.0   196983.3     2688.9    82646.1   708999.7     2382.9      204.3     3151.4     8626.2      23.21      47.05      84.57     135.81
 CFC-11           2081.0        0.0   146877.6     3439.0      85.23        0.0        0.0        0.0        0.0   195304.0     2476.0    79440.9   700599.9     2347.1      188.5     3030.9     8477.8      23.22      45.82      83.11     134.65
 CFC-11           2082.0        0.0   143438.6     3335.3      83.85        0.0        0.0        0.0        0.0   193649.3     2277.0    76382.9   692447.6     2311.7      173.4     2914.6     8332.4      23.22      44.62      81.66     133.47
 CFC-11           2083.0        0.0   140103.3     3235.2      82.49        0.0        0.0        0.0        0.0   192019.2     2097.3    73415.9   684559.4     2276.9      159.9     2802.9     8192.3      23.22      43.45      80.24     132.31
 CFC-11           2084.0        0.0   136868.0     3138.7      81.16        0.0        0.0        0.0        0.0   190413.4     1933.9    70553.9   676258.0     2242.5      147.4     2695.4     8054.9      23.21      42.31      78.84     131.16
 CFC-11           2085.0        0.0   133729.3     3045.5      79.85        0.0        0.0        0.0        0.0   188831.9     1779.2    67802.4   668335.3     2208.5      135.7     2592.3     7919.5      23.20      41.20      77.46     130.02
 CFC-11           2086.0        0.0   130683.8     2955.5      78.55        0.0        0.0        0.0        0.0   187274.4     1637.5    65186.8   660769.7     2175.1      124.9     2492.8     7786.0      23.18      40.12      76.10     128.89
 CFC-11           2087.0        0.0   127728.3     2868.7      77.28        0.0        0.0        0.0        0.0   185740.7     1505.9    62655.2   653345.9     2142.1      115.0     2396.8     7660.4      23.16      39.06      74.76     127.77
 CFC-11           2088.0        0.0   124859.7     2784.8      76.03        0.0        0.0        0.0        0.0   184230.7     1387.3    60221.6   645880.8     2109.6      105.9     2304.9     7534.5      23.13      38.04      73.45     126.64
 CFC-11           2089.0        0.0   122074.9     2703.8      74.80        0.0        0.0        0.0        0.0   182744.0     1276.6    57884.6   638607.1     2077.6       97.6     2216.3     7412.6      23.10      37.03      72.16     125.54
 CFC-11           2090.0        0.0   119371.1     2625.5      73.59        0.0        0.0        0.0        0.0   181280.4     1176.4    55654.1   631413.8     2046.0       89.6     2131.0     7294.7      23.06      36.06      70.89     124.44
 CFC-11           2091.0        0.0   116745.6     2549.9      72.39        0.0        0.0        0.0        0.0   179839.8     1083.9    53502.3   624424.6     2015.0       82.5     2049.0     7178.4      23.02      35.11      69.64     123.35
 CFC-11           2092.0        0.0   114195.7     2476.9      71.22        0.0        0.0        0.0        0.0   178421.8      997.1    51439.5   617411.0     1984.4       76.0     1969.7     7066.9      22.97      34.18      68.40     122.28
 CFC-11           2093.0        0.0   111718.8     2406.3      70.07        0.0        0.0        0.0        0.0   177026.2      919.1    49445.0   610541.1     1954.2       70.0     1894.4     6956.1      22.93      33.28      67.19     121.20
 CFC-11           2094.0        0.0   109312.6     2338.0      68.93        0.0        0.0        0.0        0.0   175652.6      846.7    47519.8   603780.3     1924.6       64.5     1821.4     6846.9      22.87      32.40      66.00     120.15
 CFC-11           2095.0        0.0   106974.6     2272.0      67.81        0.0        0.0        0.0        0.0   174300.9      779.6    45667.1   596566.8     1895.4       59.5     1751.2     6744.3      22.82      31.54      64.83     119.08
 CFC-11           2096.0        0.0   104702.5     2208.2      66.71        0.0        0.0        0.0        0.0   172970.7      717.4    43911.5   589524.6     1866.6       54.7     1683.9     6641.5      22.76      30.70      63.67     118.04
 CFC-11           2097.0        0.0   102494.3     2146.5      65.63        0.0        0.0        0.0        0.0   171661.7      660.7    42213.1   583133.4     1838.4       50.4     1618.6     6540.8      22.69      29.89      62.55     117.01
 CFC-11           2098.0        0.0   100347.8     2086.9      64.57        0.0        0.0        0.0        0.0   170373.7      607.9    40580.4   576970.6     1810.5       46.4     1556.3     6446.0      22.63      29.10      61.43     115.98
 CFC-11           2099.0        0.0    98260.9     2029.2      63.52        0.0        0.0        0.0        0.0   169106.3      559.8    39010.9   570882.0     1783.2       42.7     1496.4     6350.6      22.56      28.33      60.34     114.95
 CFC-11           2100.0        0.0    96231.7     1973.3      62.49        0.0        0.0        0.0        0.0   167859.2      514.9    37502.8   564338.8     1756.2       39.3     1438.9     6255.7      22.49      27.58      59.26     113.95
 CFC-11           2101.0        0.0    94258.4     1919.3      61.48        0.0        0.0        0.0        0.0   166632.2      474.0    36049.6   557839.9     1729.8       36.1     1382.9     6165.9      22.41      26.84      58.20     112.95
 CFC-11           2102.0        0.0    92339.1     1867.0      60.48        0.0        0.0        0.0        0.0   165425.0      436.0    34647.7   551546.1     1703.7       33.3     1329.3     6074.8      22.33      26.13      57.16     111.97
 CFC-11           2103.0        0.0    90472.1     1816.4      59.50        0.0        0.0        0.0        0.0   164237.1      401.2    33306.6   545167.3     1678.1       30.6     1278.0     5986.4      22.25      25.44      56.13     110.98
 CFC-11           2104.0        0.0    88655.7     1767.4      58.54        0.0        0.0        0.0        0.0   163068.4      369.3    32012.5   539298.3     1652.9       28.1     1228.8     5898.7      22.17      24.76      55.12     110.00
 CFC-11           2105.0        0.0    86888.4     1719.9      57.59        0.0        0.0        0.0        0.0   161918.5      339.8    30770.1   533378.0     1628.2       25.9     1181.5     5817.1      22.08      24.10      54.13     109.02
 CFC-11           2106.0        0.0    85168.4     1674.0      56.66        0.0        0.0        0.0        0.0   160787.1      312.7    29583.7   527063.1     1603.8       23.8     1136.0     5735.7      21.99      23.46      53.16     108.07
 CFC-11           2107.0        0.0    83494.4     1629.5      55.74        0.0        0.0        0.0        0.0   159674.0      287.9    28441.1   521040.4     1579.9       21.9     1092.2     5658.0      21.90      22.84      52.20     107.11
 CFC-11           2108.0        0.0    81864.9     1586.4      54.84        0.0        0.0        0.0        0.0   158578.8      265.2    27336.8   515467.5     1556.4       20.2     1049.7     5578.6      21.81      22.23      51.27     106.16
 CFC-11           2109.0        0.0    80278.5     1544.7      53.95        0.0        0.0        0.0        0.0   157501.2      244.0    26273.8   509615.8     1533.3       18.5     1009.0     5501.8      21.72      21.64      50.34     105.21
 CFC-11           2110.0        0.0    78733.8     1504.2      53.08        0.0        0.0        0.0        0.0   156440.9      224.5    25258.9   503910.1     1510.6       17.0      970.0     5423.8      21.62      21.07      49.43     104.28
 CFC-11           2111.0        0.0    77229.6     1465.0      52.22        0.0        0.0        0.0        0.0   155397.7      206.7    24277.4   498295.4     1488.2       15.7      932.6     5349.3      21.52      20.50      48.54     103.38
 CFC-11           2112.0        0.0    75764.5     1427.0      51.38        0.0        0.0        0.0        0.0   154371.2      190.1    23334.2   493035.5     1466.3       14.4      896.5     5274.1      21.42      19.95      47.66     102.46
 CFC-11           2113.0        0.0    74337.5     1390.2      50.55        0.0        0.0        0.0        0.0   153361.2      174.9    22429.0   487704.9     1444.7       13.2      862.0     5201.6      21.32      19.43      46.79     101.54
 CFC-11           2114.0        0.0    72947.3     1354.5      49.73        0.0        0.0        0.0        0.0   152367.3      161.1    21561.7   482276.1     1423.6       12.2      828.7     5133.3      21.21      18.91      45.94     100.64
 CFC-11           2115.0        0.0    71592.7     1319.9      48.93        0.0        0.0        0.0        0.0   151389.4      148.3    20721.1   477010.8     1402.7       11.2      796.5     5063.2      21.11      18.40      45.11      99.74
 CFC-11           2116.0        0.0    70272.8     1286.4      48.14        0.0        0.0        0.0        0.0   150427.0      136.3    19923.7   471514.3     1382.3       10.3      765.8     4994.4      21.00      17.92      44.29      98.86
 CFC-11           2117.0        0.0    68986.5     1253.8      47.36        0.0        0.0        0.0        0.0   149480.0      125.4    19151.3   466259.7     1362.2        9.5      736.6     4928.6      20.89      17.44      43.48      98.00
 CFC-11           2118.0        0.0    67732.6     1222.2      46.60        0.0        0.0        0.0        0.0   148548.0      115.3    18410.9   461041.9     1342.4        8.7      708.1     4863.6      20.78      16.97      42.69      97.14
 CFC-11           2119.0        0.0    66510.4     1191.6      45.85        0.0        0.0        0.0        0.0   147630.8      106.0    17696.3   455886.9     1323.0        8.0      680.7     4799.5      20.67      16.51      41.92      96.26
 CFC-11           2120.0        0.0    65318.8     1161.9      45.11        0.0        0.0        0.0        0.0   146728.1       97.5    17010.0   451061.8     1304.0        7.4      654.4     4735.8      20.56      16.07      41.16      95.39
 
 Species            Year  Prod_mean  Bank_mean  Emis_mean   Mix_mean  Prod_stdv  Prod_2.5p   Prod_50p Prod_97.5p  Bank_stdv  Bank_2.5p   Bank_50p Bank_97.5p  Emis_stdv  Emis_2.5p   Emis_50p Emis_97.5p   Mix_stdv   Mix_2.5p    Mix_50p  Mix_97.5p
 CFC-12           1950.0    34564.0   563140.3    25013.8       5.81     1727.3    31177.7    34564.0    37950.4   941134.9 -1261161.4   556285.0  2428636.0      778.1    23552.0    24991.5    26606.6       0.00       5.81       5.81       5.81
 CFC-12           1951.0    36242.0   572690.5    33858.3       7.00     1811.1    32691.3    36242.0    39792.8   939456.1 -1248167.0   565974.1  2434873.3     1046.6    31892.6    33828.3    36000.2       0.00       7.00       7.00       7.00
 CFC-12           1952.0    37240.0   575074.2    35198.4       8.62     1861.0    33591.5    37240.0    40888.6   937577.2 -1242174.5   568392.9  2433820.3     1098.6    33135.5    35167.1    37447.4       0.00       8.62       8.62       8.62
 CFC-12           1953.0    46493.0   577115.8    39578.4      10.30     2323.4    41938.0    46493.0    51048.2   935618.1 -1236584.6   570540.6  2432051.8     1240.4    37246.7    39543.4    42117.8       0.00      10.30      10.30      10.30
 CFC-12           1954.0    49124.0   584030.4    44796.2      12.18     2454.9    44311.2    49124.0    53936.9   933240.9 -1225213.5   577537.6  2434137.3     1408.6    42148.3    44756.2    47679.3       0.00      12.18      12.18      12.18
 CFC-12           1955.0    57606.0   588358.2    50333.9      14.29     2878.8    51962.2    57606.0    63250.0   930668.5 -1215808.6   582002.9  2433515.5     1588.4    47348.2    50288.5    53586.0       0.00      14.29      14.29      14.29
 CFC-12           1956.0    68674.0   595630.4    58653.4      16.67     3431.9    61945.9    68674.0    75402.4   927683.5 -1203122.5   589367.3  2434916.3     1851.1    55174.4    58600.5    62443.5       0.00      16.67      16.67      16.67
 CFC-12           1957.0    74163.0   605651.0    66674.8      19.44     3706.2    66897.1    74163.0    81429.1   924152.3 -1186559.1   599426.4  2437759.5     2108.9    62709.8    66614.7    70993.2       0.00      19.44      19.44      19.44
 CFC-12           1958.0    73437.0   613139.2    69906.4      22.58     3669.9    66242.2    73437.0    80632.0   920272.6 -1171165.3   606898.6  2437615.5     2233.4    65706.4    69843.5    74471.9       0.00      22.58      22.58      22.58
 CFC-12           1959.0    87589.0   616669.8    78120.3      25.85     4377.1    79007.7    87589.0    96170.6   916325.2 -1160265.8   610569.5  2433146.3     2502.4    73413.7    78051.2    83233.4       0.00      25.85      25.85      25.85
 CFC-12           1960.0    99428.0   626138.5    93060.9      29.50     4968.8    89686.8    99428.0   109169.5   911710.9 -1141845.9   619797.3  2433984.0     2967.3    87480.7    92977.3    99126.9       0.00      29.50      29.50      29.50
 CFC-12           1961.0   111499.0   632505.6   104563.9      33.87     5572.0   100575.2   111499.0   122423.2   906416.3 -1125049.9   626136.6  2429870.0     3341.6    98280.2   104470.1   111395.2       0.00      33.87      33.87      33.87
 CFC-12           1962.0   133995.0   639440.7   120627.9      38.76     6696.2   120867.2   133995.0   147123.2   900469.9 -1106372.6   633207.8  2424473.0     3851.7   113382.3   120519.1   128502.7       0.00      38.76      38.76      38.76
 CFC-12           1963.0   152320.0   652807.8   141701.6      44.41     7611.9   137396.9   152320.0   167243.6   893435.6 -1079385.3   646569.0  2424334.0     4512.9   133213.9   141575.1   150929.4       0.00      44.41      44.41      44.41
 CFC-12           1964.0   175997.0   663426.2   164873.9      51.06     8795.2   158754.2   175997.0   193240.4   885385.3 -1053134.9   657249.1  2419113.0     5244.6   155011.7   164727.1   175604.8       0.00      51.06      51.06      51.06
 CFC-12           1965.0   195956.0   674549.3   185875.1      58.80     9792.6   176757.8   195956.1   215154.9   876091.9 -1024266.1   668179.8  2411632.0     5925.4   174732.1   185707.4   197988.7       0.00      58.80      58.80      58.80
 CFC-12           1966.0   224982.0   684630.2   208500.2      67.51    11243.1   202940.1   224982.1   247024.7   865704.5  -992851.3   678140.8  2401166.0     6662.9   195970.4   208312.8   222121.4       0.00      67.51      67.51      67.51
 CFC-12           1967.0   251563.0   701112.0   235185.0      77.27    12571.5   226916.9   251563.1   276210.0   853877.8  -953814.1   694879.6  2394795.3     7527.5   221026.7   234977.7   250568.9       0.00      77.27      77.27      77.27
 CFC-12           1968.0   276284.0   717490.1   263852.7      88.27    13806.8   249215.9   276284.1   303353.0   840638.1  -911816.9   711258.4  2385065.8     8462.0   247938.3   263618.4   281143.3       0.00      88.27      88.27      88.27
 CFC-12           1969.0   311985.0   729921.4   294365.9     100.59    15590.9   281419.2   311985.1   342551.8   826016.7  -870026.1   723748.4  2369835.0     9463.7   276570.5   294106.2   313694.2       0.00     100.59     100.59     100.59
 CFC-12           1970.0   335799.0   747540.5   321594.1     114.32    16781.0   302900.1   335799.1   368699.0   809608.8  -821146.4   741350.6  2354046.3    10388.7   302049.2   321304.8   342786.8       0.00     114.32     114.32     114.32
 CFC-12           1971.0   362156.0   761745.4   346425.3     129.27    18098.2   326674.9   362156.1   397638.4   791862.6  -772835.1   755505.1  2332664.3    11261.9   325227.3   346113.1   369403.2       0.00     129.27     129.27     129.27
 CFC-12           1972.0   403384.0   777476.2   378254.4     145.32    20158.5   363863.7   403384.1   442905.7   772724.1  -719950.8   771243.6  2309952.3    12346.6   355007.1   377914.1   403437.8       0.00     145.32     145.32     145.32
 CFC-12           1973.0   446838.0   802605.8   418992.3     162.80    22330.0   403060.4   446838.1   490617.1   751618.4  -653193.6   796370.3  2293586.0    13698.7   393195.5   418613.9   446945.1       0.00     162.80     162.80     162.80
 CFC-12           1974.0   472198.0   830451.5   454411.2     182.15    23597.3   425935.8   472198.1   518461.8   728385.1  -580139.9   824420.0  2274860.8    14925.8   426306.1   453993.4   484857.3       0.00     182.15     182.15     182.15
 CFC-12           1975.0   419173.0   848238.3   442451.5     203.08    20947.5   378105.8   419173.1   460241.6   703707.8  -514483.1   842311.1  2244207.8    14873.4   414410.3   442036.3   472723.0       0.00     203.08     203.08     203.08
 CFC-12           1976.0   454829.0   824959.8   431810.4     223.20    22729.3   410268.5   454829.1   499391.0   680671.7  -493285.8   819073.9  2175072.0    14880.2   403703.0   431410.0   462105.6       0.00     223.20     223.20     223.20
 CFC-12           1977.0   435733.0   847978.5   418889.9     242.60    21775.0   393043.4   435733.1   478424.1   656439.2  -423960.7   842043.6  2150714.5    14848.4   390780.2   418491.6   449071.1       0.00     242.60     242.60     242.60
 CFC-12           1978.0   433882.0   864821.5   404446.4     261.17    21682.5   391373.7   433882.1   476391.8   632770.2  -360929.3   858907.4  2121677.3    14797.5   376408.1   404046.3   434532.4       0.00     261.17     261.17     261.17
 CFC-12           1979.0   427759.0   894257.1   425758.2     278.83    21376.6   385850.6   427759.1   469668.8   609148.7  -286216.8   888318.9  2104115.0    15646.6   396103.0   425331.8   457561.7       0.00     278.83     278.83     278.83
 CFC-12           1980.0   432619.0   896258.0   389594.0     297.38    21619.4   390234.5   432619.1   475005.0   585281.5  -238116.6   890408.9  2058875.5    15111.8   360917.6   389194.5   420336.5       0.00     297.38     297.38     297.38
 CFC-12           1981.0   448408.0   939283.0   379638.4     313.95    22408.5   404476.6   448408.1   492340.9   561519.4  -149332.3   933313.3  2053497.0    15212.0   350769.2   379253.8   410570.9       0.00     313.95     313.95     313.95
 CFC-12           1982.0   445639.0  1008052.6   401146.9     329.85    22270.1   401978.9   445639.1   489300.7   537297.1   -34307.7  1002676.3  2074221.3    16035.2   370716.7   400734.9   433748.0       0.00     329.85     329.85     329.85
 CFC-12           1983.0   457075.0  1052544.7   411493.2     346.68    22841.6   412294.5   457075.1   501857.1   512809.9    57960.5  1047488.1  2070453.3    16620.5   379949.8   411078.2   445273.5       0.00     346.68     346.68     346.68
 CFC-12           1984.0   467995.0  1098126.5   418877.7     363.86    23387.3   422144.6   467995.1   513847.0   487816.7   151978.6  1093285.8  2065953.1    17148.4   386282.4   418459.1   453725.0       0.00     363.86     363.86     363.86
 CFC-12           1985.0   446371.0  1147243.7   436910.5     381.24    22306.7   402639.2   446371.1   490104.4   462419.9   250798.7  1142577.9  2065744.1    17922.9   402850.9   436471.1   473332.0       0.00     381.24     381.24     381.24
 CFC-12           1986.0   481357.0  1156704.2   475019.5     399.35    24055.0   434197.5   481357.1   528518.1   437345.7   308275.6  1151927.6  2025692.0    19168.8   438634.8   474541.0   513978.3       0.00     399.35     399.35     399.35
 CFC-12           1987.0   480018.7  1163041.8   466769.5     419.19    23988.2   432990.3   480018.9   527048.8   411080.2   365685.7  1158646.6  1980382.6    19401.6   429895.7   466299.5   506172.5       0.00     419.19     419.19     419.19
 CFC-12           1988.0   478680.5  1176291.0   509678.2     438.42    23921.3   431783.2   478680.6   525579.4   385062.0   429337.1  1171862.0  1941622.8    20774.9   470212.6   509168.2   551895.4       0.00     438.42     438.42     438.42
 CFC-12           1989.0   477342.2  1145293.3   447566.3     459.61    23854.4   430576.0   477342.3   524110.0   358897.0   449171.0  1140992.1  1858645.4    19885.0   409699.7   447107.4   487885.4       0.00     459.61     459.61     459.61
 CFC-12           1990.0   339135.4  1175069.2   364190.0     477.49    16947.7   305909.6   339135.5   372362.3   333667.9   528879.8  1171014.3  1837637.8    18679.7   328471.0   363832.0   401850.9       0.00     477.49     477.49     477.49
 CFC-12           1991.0   291584.6  1150014.6   288692.8     491.03    14571.5   263017.5   291584.7   320152.7   311716.4   545610.5  1146372.8  1768904.5    17763.5   254603.4   288386.0   324303.4       0.00     491.03     491.03     491.03
 CFC-12           1992.0   270946.2  1152906.4   287027.3     500.66    13540.1   244401.0   270946.3   297492.3   291155.5   587250.7  1149870.5  1730561.1    18000.5   252474.2   286721.1   323066.8       0.00     500.66     500.66     500.66
 CFC-12           1993.0   274465.2  1136825.3   239744.3     510.12    13716.0   247575.3   274465.3   301356.0   270960.4   610129.8  1134227.0  1674246.6    17599.6   205870.7   239492.2   274953.7       0.00     510.12     510.12     510.12
 CFC-12           1994.0   211595.2  1171546.2   234566.0     517.12    10574.1   190864.8   211595.3   232326.3   251187.3   683788.5  1169288.4  1670142.1    17732.5   200384.9   234316.8   270012.6       0.00     517.12     517.12     517.12
 CFC-12           1995.0   156604.4  1148575.4   204510.5     523.80     7826.1   141261.6   156604.5   171947.8   232253.1   697418.7  1146525.5  1608849.0    17566.2   170581.2   204281.9   239525.0       0.00     523.80     523.80     523.80
 CFC-12           1996.0    89668.5  1100669.4   194582.6     528.91     4481.0    80883.5    89668.5    98453.8   214064.2   684758.6  1098998.8  1524280.4    17606.7   160542.1   194366.2   229655.9       0.00     528.91     528.91     528.91
 CFC-12           1997.0    89975.1   995755.2   162665.9     533.47     4496.4    81160.1    89975.1    98790.5   196473.4   614038.6   994375.3  1384541.8    17424.7   128884.2   162482.2   197285.5       0.00     533.47     533.47     533.47
 CFC-12           1998.0    88164.5   923064.4   156873.8     536.39     4405.9    79526.8    88164.5    96802.4   179049.6   575233.5   921894.3  1277203.3    17460.0   123041.8   156689.6   191543.2       0.00     536.39     536.39     536.39
 CFC-12           1999.0    87520.6   854355.1   145791.5     539.00     4373.7    78946.0    87520.6    96095.5   161704.9   539778.3   853365.4  1174098.0    17443.4   111958.5   145631.6   180423.5       0.00     539.00     539.00     539.00
 CFC-12           2000.0    83405.3   796084.3   141541.7     541.02     4168.0    75233.9    83405.3    91576.9   144504.3   514590.2   795265.3  1081692.1    17469.7   107660.6   141384.8   176230.5       0.00     541.02     541.02     541.02
 CFC-12           2001.0    65605.0   737947.9   117792.6     542.82     3278.5    59177.6    65605.0    72032.7   127497.1   489815.8   737302.2   990086.7    17346.8    84069.5   117651.4   152162.8       0.00     542.82     542.82     542.82
 CFC-12           2002.0    59191.0   685760.3   108798.9     543.41     2958.0    53391.9    59191.0    64990.2   110925.5   469644.4   685231.9   905216.5    17305.0    75133.1   108667.8   143054.1       0.00     543.41     543.41     543.41
 CFC-12           2003.0    55007.9   636152.4   103744.9     543.54     2748.9    49618.7    55007.9    60397.4    94787.0   451674.8   635793.6   823358.5    17277.3    70131.0   103619.4   137920.7       0.00     543.54     543.54     543.54
 CFC-12           2004.0    47897.8   587415.4    91331.8     543.42     2393.6    43205.1    47897.8    52590.6    79274.5   433020.8   587120.6   743793.0    17200.9    57830.8    91222.3   125316.9       0.00     543.42     543.42     543.42
 CFC-12           2005.0    35983.6   543981.4    88072.8     542.69     1798.2    32458.2    35983.6    39509.1    64829.4   417482.3   543700.5   671494.2    17160.4    54638.3    87967.3   121969.4       0.00     542.69     542.69     542.69
 CFC-12           2006.0    22315.5   491892.2    66199.3     541.79     1115.2    20129.2    22315.5    24501.9    52218.3   389751.8   491766.3   594425.9    17027.2    33035.0    66120.0    99774.3       0.00     541.79     541.79     541.79
 CFC-12           2007.0     9371.7   448008.4    63381.1     539.81      468.3     8453.5     9371.7    10289.9    42990.3   363810.1   447920.7   532252.8    16953.7    30354.8    63299.4    96801.6       0.00     539.81     539.81     539.81
 CFC-12           2008.0     2732.1   393999.0    56010.0     537.72      136.5     2464.5     2732.2     2999.8    39378.9   316799.1   393999.2   471201.6    16854.6    23150.5    55929.8    89227.9       0.00     537.72     537.72     537.72
 CFC-12           2009.0     1366.1   340721.1    49528.8     535.27       68.3     1232.2     1366.1     1499.9    42715.3   256934.7   340762.7   424614.3     5966.0    38328.1    49360.9    61661.9       0.01     535.27     535.27     535.27
 CFC-12           2010.0        0.0   292558.4    42203.9     532.52        0.0        0.0        0.0        0.0    41396.1   212589.3   292227.3   374978.6     4583.8    33465.5    42120.4    51422.2       0.80     530.90     532.55     534.03
 CFC-12           2011.0        0.0   250354.6    35984.8     529.44        0.0        0.0        0.0        0.0    40094.7   174293.1   249561.3   331299.1     3655.6    28916.3    35949.6    43232.4       1.61     526.19     529.48     532.48
 CFC-12           2012.0        0.0   214369.8    30701.3     526.08        0.0        0.0        0.0        0.0    38626.5   142480.1   213159.2   293557.7     3077.4    24624.2    30704.4    36705.9       2.42     521.21     526.13     530.68
 CFC-12           2013.0        0.0   183668.5    26209.7     522.48        0.0        0.0        0.0        0.0    36951.3   116011.7   182093.5   260625.6     2742.7    20670.4    26254.3    31453.3       3.23     516.01     522.55     528.66
 CFC-12           2014.0        0.0   157458.8    22389.0     518.70        0.0        0.0        0.0        0.0    35094.4    94410.0   155552.1   231567.6     2553.3    17145.9    22466.3    27175.4       4.05     510.64     518.77     526.46
 CFC-12           2015.0        0.0   135069.8    19136.8     514.77        0.0        0.0        0.0        0.0    33105.7    76711.1   132892.6   205983.8     2435.3    14116.7    19226.2    23658.9       4.85     505.12     514.83     524.12
 CFC-12           2016.0        0.0   115932.9    16367.0     510.71        0.0        0.0        0.0        0.0    31039.4    62330.0   113536.2   183335.8     2343.6    11572.1    16453.3    20729.7       5.65     499.51     510.77     521.64
 CFC-12           2017.0        0.0    99565.9    14006.4     506.56        0.0        0.0        0.0        0.0    28945.2    50617.0    97013.7   163360.0     2255.1     9447.8    14068.8    18248.8       6.44     493.83     506.62     519.05
 CFC-12           2018.0        0.0    85559.5    11993.5     502.33        0.0        0.0        0.0        0.0    26864.8    41041.6    82886.5   145493.1     2160.4     7694.7    12029.2    16112.3       7.22     488.11     502.38     516.37
 CFC-12           2019.0        0.0    73566.1    10275.8     498.04        0.0        0.0        0.0        0.0    24831.1    33287.2    70829.0   129686.9     2057.1     6255.5    10282.0    14264.2       7.98     482.36     498.08     513.62
 CFC-12           2020.0        0.0    63290.2     8809.4     493.71        0.0        0.0        0.0        0.0    22868.9    26982.8    60518.2   115540.3     1946.1     5085.9     8790.6    12655.2       8.73     476.60     493.74     510.78
 CFC-12           2021.0        0.0    54480.8     7556.6     489.34        0.0        0.0        0.0        0.0    20995.8    21874.7    51695.6   103006.8     1829.9     4132.1     7512.3    11243.8       9.47     470.84     489.36     507.90
 CFC-12           2022.0        0.0    46924.2     6485.7     484.96        0.0        0.0        0.0        0.0    19223.4    17720.1    44177.1    91887.3     1711.1     3352.6     6419.7     9998.9      10.18     465.09     484.96     504.98
 CFC-12           2023.0        0.0    40438.5     5569.8     480.57        0.0        0.0        0.0        0.0    17558.7    14354.6    37744.4    81955.1     1592.0     2719.7     5487.4     8897.3      10.88     459.39     480.56     502.01
 CFC-12           2024.0        0.0    34868.8     4785.9     476.18        0.0        0.0        0.0        0.0    16004.8    11634.0    32256.2    73095.8     1474.6     2204.6     4689.0     7920.2      11.57     453.71     476.15     499.02
 CFC-12           2025.0        0.0    30082.8     4114.7     471.79        0.0        0.0        0.0        0.0    14561.9     9421.5    27560.7    65203.9     1360.5     1787.4     4007.5     7058.2      12.24     448.08     471.74     496.00
 CFC-12           2026.0        0.0    25968.1     3539.6     467.42        0.0        0.0        0.0        0.0    13228.0     7627.8    23548.4    58229.0     1251.1     1447.8     3424.4     6288.6      12.89     442.50     467.34     492.97
 CFC-12           2027.0        0.0    22428.5     3046.6     463.05        0.0        0.0        0.0        0.0    11999.7     6171.9    20116.4    51974.4     1146.9     1173.6     2925.7     5606.0      13.52     436.94     462.96     489.92
 CFC-12           2028.0        0.0    19382.0     2623.7     458.71        0.0        0.0        0.0        0.0    10872.2     5001.8    17186.8    46395.2     1048.7      951.0     2500.7     4996.9      14.14     431.45     458.60     486.86
 CFC-12           2029.0        0.0    16758.3     2260.7     454.39        0.0        0.0        0.0        0.0     9840.3     4046.2    14683.3    41394.1      956.7      770.0     2136.6     4454.1      14.75     426.02     454.25     483.78
 CFC-12           2030.0        0.0    14497.5     1949.1     450.09        0.0        0.0        0.0        0.0     8898.2     3273.0    12550.1    36955.5      871.1      623.8     1826.2     3972.9      15.34     420.64     449.93     480.70
 CFC-12           2031.0        0.0    12548.5     1681.3     445.82        0.0        0.0        0.0        0.0     8039.9     2648.9    10723.7    32997.5      791.7      504.7     1560.3     3544.2      15.91     415.32     445.63     477.63
 CFC-12           2032.0        0.0    10867.2     1451.0     441.58        0.0        0.0        0.0        0.0     7259.4     2144.7     9163.2    29460.2      718.4      409.0     1333.3     3161.3      16.47     410.06     441.37     474.57
 CFC-12           2033.0        0.0     9416.1     1253.0     437.37        0.0        0.0        0.0        0.0     6550.9     1735.1     7830.1    26285.7      651.0      330.9     1138.9     2820.2      17.02     404.86     437.13     471.51
 CFC-12           2034.0        0.0     8163.1     1082.6     433.20        0.0        0.0        0.0        0.0     5908.6     1403.8     6688.7    23470.8      589.3      267.8      973.0     2517.5      17.55     399.71     432.92     468.45
 CFC-12           2035.0        0.0     7080.5      935.8     429.05        0.0        0.0        0.0        0.0     5327.0     1135.5     5715.1    20954.6      532.8      216.6      831.4     2248.8      18.07     394.62     428.75     465.40
 CFC-12           2036.0        0.0     6144.7      809.4     424.94        0.0        0.0        0.0        0.0     4801.0      919.0     4883.2    18706.8      481.3      175.5      710.6     2006.6      18.57     389.59     424.61     462.36
 CFC-12           2037.0        0.0     5335.3      700.4     420.87        0.0        0.0        0.0        0.0     4325.8      743.5     4172.2    16704.6      434.5      141.9      607.2     1790.6      19.07     384.63     420.51     459.34
 CFC-12           2038.0        0.0     4634.8      606.4     416.82        0.0        0.0        0.0        0.0     3896.7      602.0     3565.5    14916.2      391.9      114.8      518.9     1598.2      19.55     379.73     416.44     456.32
 CFC-12           2039.0        0.0     4028.4      525.3     412.82        0.0        0.0        0.0        0.0     3509.6      487.3     3046.6    13321.4      353.3       92.9      443.4     1426.8      20.02     374.88     412.41     453.31
 CFC-12           2040.0        0.0     3503.1      455.3     408.85        0.0        0.0        0.0        0.0     3160.6      394.3     2603.9    11896.2      318.4       75.2      378.8     1274.6      20.47     370.10     408.41     450.31
 CFC-12           2041.0        0.0     3047.8      394.8     404.92        0.0        0.0        0.0        0.0     2846.0      319.2     2224.7    10616.6      286.7       60.8      323.7     1137.6      20.92     365.38     404.45     447.34
 CFC-12           2042.0        0.0     2653.0      342.5     401.02        0.0        0.0        0.0        0.0     2562.7      258.2     1900.9     9475.0      258.2       49.2      276.6     1015.1      21.35     360.72     400.53     444.37
 CFC-12           2043.0        0.0     2310.5      297.3     397.16        0.0        0.0        0.0        0.0     2307.6      208.9     1624.2     8460.9      232.4       39.9      236.2      906.3      21.78     356.12     396.64     441.43
 CFC-12           2044.0        0.0     2013.2      258.2     393.33        0.0        0.0        0.0        0.0     2078.0      169.1     1387.9     7558.1      209.1       32.2      201.9      809.2      22.19     351.57     392.79     438.50
 CFC-12           2045.0        0.0     1755.0      224.3     389.54        0.0        0.0        0.0        0.0     1871.3      137.0     1186.2     6751.0      188.2       26.1      172.5      722.6      22.59     347.08     388.97     435.60
 CFC-12           2046.0        0.0     1530.7      195.0     385.79        0.0        0.0        0.0        0.0     1685.3      110.9     1013.3     6028.5      169.3       21.1      147.5      645.3      22.99     342.64     385.19     432.69
 CFC-12           2047.0        0.0     1335.7      169.6     382.07        0.0        0.0        0.0        0.0     1518.1       89.7      865.6     5383.0      152.3       17.1      126.0      576.3      23.37     338.27     381.44     429.81
 CFC-12           2048.0        0.0     1166.1      147.6     378.39        0.0        0.0        0.0        0.0     1367.6       72.6      739.6     4802.7      137.0       13.8      107.6      514.6      23.74     333.94     377.73     426.96
 CFC-12           2049.0        0.0     1018.5      128.5     374.74        0.0        0.0        0.0        0.0     1232.2       58.7      632.0     4285.8      123.2       11.2       92.0      459.4      24.10     329.67     374.05     424.12
 CFC-12           2050.0        0.0      890.0      111.9     371.13        0.0        0.0        0.0        0.0     1110.5       47.5      540.1     3828.0      110.8        9.1       78.6      409.9      24.46     325.45     370.41     421.29
 CFC-12           2051.0        0.0      778.1       97.5     367.55        0.0        0.0        0.0        0.0     1001.0       38.4      461.6     3416.6       99.7        7.3       67.2      366.0      24.80     321.30     366.80     418.49
 CFC-12           2052.0        0.0      680.6       85.0     364.01        0.0        0.0        0.0        0.0      902.5       31.1      394.3     3052.8       89.7        5.9       57.4      326.9      25.14     317.19     363.23     415.70
 CFC-12           2053.0        0.0      595.6       74.2     360.50        0.0        0.0        0.0        0.0      813.9       25.1      336.9     2727.6       80.7        4.8       49.0      292.0      25.46     313.13     359.69     412.91
 CFC-12           2054.0        0.0      521.5       64.7     357.03        0.0        0.0        0.0        0.0      734.1       20.3      287.9     2435.4       72.6        3.9       41.9      260.8      25.78     309.12     356.19     410.15
 CFC-12           2055.0        0.0      456.7       56.5     353.59        0.0        0.0        0.0        0.0      662.4       16.5      245.9     2174.5       65.3        3.1       35.8      232.8      26.09     305.17     352.71     407.39
 CFC-12           2056.0        0.0      400.2       49.3     350.18        0.0        0.0        0.0        0.0      597.9       13.3      210.1     1941.6       58.8        2.5       30.6      207.8      26.39     301.27     349.28     404.66
 CFC-12           2057.0        0.0      350.9       43.1     346.81        0.0        0.0        0.0        0.0      539.8       10.8      179.5     1734.4       52.9        2.1       26.1      185.4      26.69     297.41     345.87     401.95
 CFC-12           2058.0        0.0      307.8       37.7     343.47        0.0        0.0        0.0        0.0      487.5        8.7      153.4     1549.0       47.7        1.7       22.3      165.6      26.97     293.60     342.50     399.25
 CFC-12           2059.0        0.0      270.1       33.0     340.16        0.0        0.0        0.0        0.0      440.4        7.1      131.1     1383.3       42.9        1.3       19.1      147.9      27.25     289.86     339.16     396.57
 CFC-12           2060.0        0.0      237.1       28.9     336.89        0.0        0.0        0.0        0.0      397.9        5.7      112.0     1235.1       38.7        1.1       16.3      132.0      27.52     286.15     335.86     393.92
 CFC-12           2061.0        0.0      208.3       25.3     333.65        0.0        0.0        0.0        0.0      359.7        4.6       95.7     1102.9       34.8        0.9       13.9      118.0      27.78     282.50     332.58     391.29
 CFC-12           2062.0        0.0      183.0       22.1     330.44        0.0        0.0        0.0        0.0      325.3        3.7       81.8      985.0       31.4        0.7       11.9      105.4      28.03     278.89     329.33     388.68
 CFC-12           2063.0        0.0      160.9       19.4     327.26        0.0        0.0        0.0        0.0      294.3        3.0       69.9      879.4       28.3        0.6       10.2       94.1      28.28     275.32     326.12     386.08
 CFC-12           2064.0        0.0      141.5       17.0     324.11        0.0        0.0        0.0        0.0      266.3        2.4       59.7      785.2       25.5        0.5        8.7       84.0      28.52     271.80     322.94     383.48
 CFC-12           2065.0        0.0      124.5       14.9     320.99        0.0        0.0        0.0        0.0      241.1        2.0       51.0      701.1       23.0        0.4        7.4       75.0      28.75     268.32     319.79     380.90
 CFC-12           2066.0        0.0      109.6       13.1     317.91        0.0        0.0        0.0        0.0      218.3        1.6       43.6      626.3       20.8        0.3        6.3       67.0      28.98     264.89     316.68     378.35
 CFC-12           2067.0        0.0       96.5       11.5     314.85        0.0        0.0        0.0        0.0      197.8        1.3       37.2      559.5       18.8        0.2        5.4       59.9      29.19     261.50     313.58     375.81
 CFC-12           2068.0        0.0       85.0       10.1     311.83        0.0        0.0        0.0        0.0      179.2        1.0       31.8      499.8       16.9        0.2        4.6       53.4      29.41     258.15     310.53     373.30
 CFC-12           2069.0        0.0       74.9        8.9     308.83        0.0        0.0        0.0        0.0      162.5        0.8       27.2      446.4       15.3        0.2        4.0       47.7      29.61     254.84     307.50     370.81
 CFC-12           2070.0        0.0       66.1        7.8     305.87        0.0        0.0        0.0        0.0      147.4        0.7       23.2      398.6       13.8        0.1        3.4       42.6      29.81     251.59     304.50     368.33
 CFC-12           2071.0        0.0       58.3        6.8     302.93        0.0        0.0        0.0        0.0      133.7        0.6       19.8      356.0       12.5        0.1        2.9       38.0      30.00     248.36     301.53     365.86
 CFC-12           2072.0        0.0       51.4        6.0     300.02        0.0        0.0        0.0        0.0      121.4        0.4       17.0      317.9       11.3        0.1        2.5       34.0      30.19     245.19     298.59     363.40
 CFC-12           2073.0        0.0       45.4        5.3     297.14        0.0        0.0        0.0        0.0      110.2        0.4       14.5      284.0       10.2        0.1        2.1       30.3      30.37     242.05     295.68     360.95
 CFC-12           2074.0        0.0       40.1        4.7     294.29        0.0        0.0        0.0        0.0      100.1        0.3       12.4      253.6        9.3        0.1        1.8       27.1      30.54     238.95     292.80     358.57
 CFC-12           2075.0        0.0       35.4        4.1     291.47        0.0        0.0        0.0        0.0       91.0        0.2       10.6      226.5        8.4        0.0        1.5       24.2      30.71     235.89     289.94     356.17
 CFC-12           2076.0        0.0       31.3        3.6     288.67        0.0        0.0        0.0        0.0       82.7        0.2        9.0      202.1        7.6        0.0        1.3       21.6      30.87     232.87     287.11     353.75
 CFC-12           2077.0        0.0       27.7        3.2     285.90        0.0        0.0        0.0        0.0       75.2        0.2        7.7      180.5        6.9        0.0        1.1       19.3      31.03     229.89     284.31     351.37
 CFC-12           2078.0        0.0       24.5        2.8     283.16        0.0        0.0        0.0        0.0       68.4        0.1        6.6      161.3        6.2        0.0        1.0       17.2      31.18     226.95     281.54     349.01
 CFC-12           2079.0        0.0       21.7        2.5     280.45        0.0        0.0        0.0        0.0       62.3        0.1        5.6      144.0        5.6        0.0        0.8       15.4      31.32     224.04     278.79     346.67
 CFC-12           2080.0        0.0       19.2        2.2     277.76        0.0        0.0        0.0        0.0       56.7        0.1        4.8      128.6        5.1        0.0        0.7       13.8      31.46     221.18     276.08     344.34
 CFC-12           2081.0        0.0       17.0        1.9     275.10        0.0        0.0        0.0        0.0       51.7        0.1        4.1      114.9        4.6        0.0        0.6       12.3      31.60     218.35     273.38     342.03
 CFC-12           2082.0        0.0       15.1        1.7     272.47        0.0        0.0        0.0        0.0       47.1        0.1        3.5      102.6        4.2        0.0        0.5       11.0      31.73     215.56     270.71     339.73
 CFC-12           2083.0        0.0       13.4        1.5     269.86        0.0        0.0        0.0        0.0       42.9        0.0        3.0       91.6        3.8        0.0        0.4        9.8      31.85     212.80     268.07     337.45
 CFC-12           2084.0        0.0       11.9        1.3     267.27        0.0        0.0        0.0        0.0       39.1        0.0        2.6       81.9        3.5        0.0        0.4        8.7      31.97     210.08     265.46     335.18
 CFC-12           2085.0        0.0       10.5        1.2     264.72        0.0        0.0        0.0        0.0       35.7        0.0        2.2       73.1        3.2        0.0        0.3        7.8      32.08     207.38     262.87     332.92
 CFC-12           2086.0        0.0        9.3        1.0     262.18        0.0        0.0        0.0        0.0       32.6        0.0        1.9       65.3        2.9        0.0        0.3        7.0      32.19     204.73     260.31     330.69
 CFC-12           2087.0        0.0        8.3        0.9     259.68        0.0        0.0        0.0        0.0       29.8        0.0        1.6       58.3        2.6        0.0        0.2        6.2      32.29     202.11     257.77     328.46
 CFC-12           2088.0        0.0        7.4        0.8     257.19        0.0        0.0        0.0        0.0       27.2        0.0        1.4       52.1        2.4        0.0        0.2        5.6      32.39     199.53     255.26     326.25
 CFC-12           2089.0        0.0        6.5        0.7     254.74        0.0        0.0        0.0        0.0       24.8        0.0        1.2       46.5        2.2        0.0        0.2        5.0      32.49     196.98     252.77     324.07
 CFC-12           2090.0        0.0        5.8        0.6     252.30        0.0        0.0        0.0        0.0       22.7        0.0        1.0       41.5        2.0        0.0        0.1        4.4      32.58     194.45     250.30     321.89
 CFC-12           2091.0        0.0        5.2        0.6     249.89        0.0        0.0        0.0        0.0       20.8        0.0        0.9       37.1        1.8        0.0        0.1        4.0      32.66     191.97     247.86     319.72
 CFC-12           2092.0        0.0        4.6        0.5     247.50        0.0        0.0        0.0        0.0       19.0        0.0        0.7       33.1        1.6        0.0        0.1        3.5      32.74     189.51     245.44     317.57
 CFC-12           2093.0        0.0        4.1        0.4     245.14        0.0        0.0        0.0        0.0       17.4        0.0        0.6       29.6        1.5        0.0        0.1        3.2      32.82     187.08     243.05     315.44
 CFC-12           2094.0        0.0        3.6        0.4     242.80        0.0        0.0        0.0        0.0       15.9        0.0        0.5       26.5        1.4        0.0        0.1        2.8      32.89     184.69     240.68     313.32
 CFC-12           2095.0        0.0        3.2        0.4     240.48        0.0        0.0        0.0        0.0       14.6        0.0        0.5       23.6        1.2        0.0        0.1        2.5      32.96     182.33     238.33     311.22
 CFC-12           2096.0        0.0        2.9        0.3     238.19        0.0        0.0        0.0        0.0       13.3        0.0        0.4       21.1        1.1        0.0        0.1        2.3      33.03     179.99     236.01     309.12
 CFC-12           2097.0        0.0        2.6        0.3     235.91        0.0        0.0        0.0        0.0       12.2        0.0        0.3       18.8        1.0        0.0        0.0        2.0      33.09     177.68     233.71     307.05
 CFC-12           2098.0        0.0        2.3        0.2     233.66        0.0        0.0        0.0        0.0       11.2        0.0        0.3       16.8        0.9        0.0        0.0        1.8      33.14     175.42     231.43     305.00
 CFC-12           2099.0        0.0        2.1        0.2     231.44        0.0        0.0        0.0        0.0       10.3        0.0        0.2       15.0        0.9        0.0        0.0        1.6      33.19     173.17     229.17     302.96
 CFC-12           2100.0        0.0        1.8        0.2     229.23        0.0        0.0        0.0        0.0        9.4        0.0        0.2       13.4        0.8        0.0        0.0        1.4      33.24     170.95     226.94     300.93
 CFC-12           2101.0        0.0        1.6        0.2     227.04        0.0        0.0        0.0        0.0        8.6        0.0        0.2       12.0        0.7        0.0        0.0        1.3      33.29     168.76     224.72     298.92
 CFC-12           2102.0        0.0        1.5        0.2     224.88        0.0        0.0        0.0        0.0        7.9        0.0        0.2       10.7        0.7        0.0        0.0        1.1      33.33     166.61     222.53     296.91
 CFC-12           2103.0        0.0        1.3        0.1     222.74        0.0        0.0        0.0        0.0        7.3        0.0        0.1        9.6        0.6        0.0        0.0        1.0      33.37     164.47     220.36     294.92
 CFC-12           2104.0        0.0        1.2        0.1     220.62        0.0        0.0        0.0        0.0        6.7        0.0        0.1        8.6        0.5        0.0        0.0        0.9      33.40     162.37     218.21     292.95
 CFC-12           2105.0        0.0        1.0        0.1     218.52        0.0        0.0        0.0        0.0        6.2        0.0        0.1        7.6        0.5        0.0        0.0        0.8      33.43     160.29     216.09     290.98
 CFC-12           2106.0        0.0        0.9        0.1     216.44        0.0        0.0        0.0        0.0        5.7        0.0        0.1        6.8        0.5        0.0        0.0        0.7      33.46     158.25     213.98     289.02
 CFC-12           2107.0        0.0        0.8        0.1     214.38        0.0        0.0        0.0        0.0        5.2        0.0        0.1        6.1        0.4        0.0        0.0        0.7      33.48     156.22     211.89     287.08
 CFC-12           2108.0        0.0        0.7        0.1     212.34        0.0        0.0        0.0        0.0        4.8        0.0        0.1        5.4        0.4        0.0        0.0        0.6      33.50     154.22     209.82     285.16
 CFC-12           2109.0        0.0        0.7        0.1     210.32        0.0        0.0        0.0        0.0        4.4        0.0        0.1        4.9        0.4        0.0        0.0        0.5      33.52     152.25     207.77     283.24
 CFC-12           2110.0        0.0        0.6        0.1     208.32        0.0        0.0        0.0        0.0        4.0        0.0        0.0        4.3        0.3        0.0        0.0        0.5      33.53     150.30     205.74     281.34
 CFC-12           2111.0        0.0        0.5        0.1     206.34        0.0        0.0        0.0        0.0        3.7        0.0        0.0        3.9        0.3        0.0        0.0        0.4      33.54     148.38     203.74     279.46
 CFC-12           2112.0        0.0        0.5        0.0     204.38        0.0        0.0        0.0        0.0        3.4        0.0        0.0        3.5        0.3        0.0        0.0        0.4      33.55     146.49     201.75     277.58
 CFC-12           2113.0        0.0        0.4        0.0     202.44        0.0        0.0        0.0        0.0        3.2        0.0        0.0        3.1        0.3        0.0        0.0        0.3      33.56     144.61     199.78     275.72
 CFC-12           2114.0        0.0        0.4        0.0     200.51        0.0        0.0        0.0        0.0        2.9        0.0        0.0        2.8        0.2        0.0        0.0        0.3      33.56     142.76     197.84     273.87
 CFC-12           2115.0        0.0        0.3        0.0     198.61        0.0        0.0        0.0        0.0        2.7        0.0        0.0        2.5        0.2        0.0        0.0        0.3      33.56     140.94     195.91     272.03
 CFC-12           2116.0        0.0        0.3        0.0     196.72        0.0        0.0        0.0        0.0        2.5        0.0        0.0        2.2        0.2        0.0        0.0        0.2      33.55     139.13     194.00     270.21
 CFC-12           2117.0        0.0        0.3        0.0     194.86        0.0        0.0        0.0        0.0        2.3        0.0        0.0        2.0        0.2        0.0        0.0        0.2      33.55     137.35     192.11     268.40
 CFC-12           2118.0        0.0        0.3        0.0     193.01        0.0        0.0        0.0        0.0        2.1        0.0        0.0        1.8        0.2        0.0        0.0        0.2      33.54     135.60     190.23     266.60
 CFC-12           2119.0        0.0        0.2        0.0     191.18        0.0        0.0        0.0        0.0        1.9        0.0        0.0        1.6        0.2        0.0        0.0        0.2      33.53     133.86     188.38     264.82
 CFC-12           2120.0        0.0        0.2        0.0     189.36        0.0        0.0        0.0        0.0        1.8        0.0        0.0        1.4        0.1        0.0        0.0        0.2      33.51     132.15     186.54     263.05
 
 Species            Year  Prod_mean  Bank_mean  Emis_mean   Mix_mean  Prod_stdv  Prod_2.5p   Prod_50p Prod_97.5p  Bank_stdv  Bank_2.5p   Bank_50p Bank_97.5p  Emis_stdv  Emis_2.5p   Emis_50p Emis_97.5p   Mix_stdv   Mix_2.5p    Mix_50p  Mix_97.5p
 CFC-113          1950.0     1800.0    10848.5    25119.6       0.19       90.0     1623.7     1800.0     1976.4   206545.0  -387141.3     8738.4   422258.1      755.9    23702.9    25096.9    26664.4       0.00       0.19       0.19       0.19
 CFC-113          1951.0     2000.0   -12471.1     1859.1       1.00       99.9     1804.1     2000.0     2195.9   206127.5  -409650.1   -14559.0   398273.6       80.4     1706.4     1857.2     2021.6       0.00       1.00       1.00       1.00
 CFC-113          1952.0     2300.0   -12330.2     2106.9       1.05      114.9     2074.7     2300.0     2525.3   205999.6  -409249.3   -14410.3   398151.6       87.7     1940.4     2104.8     2284.5       0.00       1.05       1.05       1.05
 CFC-113          1953.0     2600.0   -12137.1     2403.1       1.11      129.9     2345.3     2600.0     2854.7   205855.8  -408771.0   -14210.0   398050.3       96.6     2219.9     2400.7     2598.6       0.00       1.11       1.11       1.11
 CFC-113          1954.0     3000.0   -11940.2     2749.7       1.17      149.9     2706.1     3000.0     3293.9   205695.3  -408256.4   -14007.5   397920.1      107.1     2547.0     2746.9     2966.8       0.00       1.17       1.17       1.17
 CFC-113          1955.0     3500.0   -11689.9     3195.7       1.25      174.9     3157.1     3500.0     3842.9   205513.3  -407643.7   -13776.3   397804.6      120.5     2968.0     3192.5     3440.4       0.00       1.25       1.25       1.25
 CFC-113          1956.0     4000.0   -11385.7     3689.7       1.34      199.9     3608.1     4000.0     4391.9   205304.7  -406895.8   -13472.0   397683.3      135.7     3433.4     3686.0     3965.4       0.00       1.34       1.34       1.34
 CFC-113          1957.0     4500.0   -11075.3     4183.6       1.44      224.9     4059.1     4500.0     4940.9   205068.2  -406135.6   -13159.7   397567.2      151.5     3897.6     4179.4     4491.4       0.00       1.44       1.44       1.44
 CFC-113          1958.0     5200.0   -10759.0     4777.4       1.56      259.9     4690.6     5200.0     5709.5   204803.6  -405292.9   -12851.2   397348.3      170.4     4456.0     4772.7     5123.9       0.00       1.56       1.56       1.56
 CFC-113          1959.0     6000.0   -10336.4     5519.9       1.70      299.8     5412.2     6000.0     6587.8   204501.6  -404264.1   -12410.6   397207.4      193.8     5154.6     5514.5     5913.8       0.00       1.70       1.70       1.70
 CFC-113          1960.0     6850.0    -9856.3     6310.8       1.86      342.3     6178.9     6850.0     7521.1   204156.0  -403090.1   -11935.4   396999.0      219.1     5897.6     6304.6     6756.3       0.00       1.86       1.86       1.86
 CFC-113          1961.0     7800.0    -9317.0     7151.4       2.04      389.8     7035.8     7800.0     8564.2   203763.7  -401786.5   -11404.3   396732.9      246.6     6686.5     7144.5     7652.4       0.00       2.04       2.04       2.04
 CFC-113          1962.0     9000.0    -8668.4     8181.9       2.25      449.8     8118.3     9000.0     9881.8   203319.6  -400263.5   -10775.6   396570.6      279.8     7654.6     8174.0     8750.8       0.00       2.25       2.25       2.25
 CFC-113          1963.0    10300.0    -7850.3     9402.7       2.49      514.7     9290.9    10300.0    11309.1   202811.4  -398406.3    -9958.7   396395.6      319.0     8801.2     9393.3    10051.2       0.00       2.49       2.49       2.49
 CFC-113          1964.0    11800.0    -6953.0    10770.9       2.77      589.7    10643.9    11800.0    12956.1   202231.7  -396358.0    -9055.7   396139.4      363.2    10086.2    10760.2    11509.3       0.00       2.77       2.77       2.77
 CFC-113          1965.0    13500.0    -5923.9    12335.2       3.08      674.6    12177.4    13500.0    14822.6   201570.4  -393995.7    -8040.2   395890.3      413.8    11555.8    12323.1    13176.9       0.00       3.08       3.08       3.08
 CFC-113          1966.0    15500.0    -4759.1    14144.8       3.45      774.6    13981.4    15500.0    17018.6   200816.2  -391348.5    -6878.6   395498.8      472.3    13255.0    14130.8    15106.1       0.00       3.45       3.45       3.45
 CFC-113          1967.0    17700.0    -3404.0    16199.6       3.87      884.5    15965.9    17700.0    19434.1   199953.6  -388324.8    -5501.5   395100.2      539.0    15184.5    16183.3    17296.8       0.00       3.87       3.87       3.87
 CFC-113          1968.0    20300.0    -1903.5    18550.3       4.35     1014.5    18311.2    20300.0    22288.9   198970.5  -384873.3    -4012.3   394582.9      615.2    17391.6    18531.6    19803.0       0.00       4.35       4.35       4.35
 CFC-113          1969.0    23200.0     -153.9    21244.4       4.90     1159.4    20927.1    23200.0    25473.0   197846.6  -380847.5    -2324.8   394057.0      702.7    19920.7    21223.2    22675.3       0.00       4.90       4.90       4.90
 CFC-113          1970.0    26600.0     1801.7    24332.2       5.53     1329.3    23994.0    26600.0    29206.1   196564.4  -376380.9     -349.7   393561.2      803.0    22819.5    24307.9    25966.9       0.00       5.53       5.53       5.53
 CFC-113          1971.0    30500.0     4069.5    27910.9       6.26     1524.2    27511.9    30500.0    33488.2   195098.5  -371244.9     1882.4   392685.7      919.0    26180.0    27883.1    29782.5       0.00       6.26       6.26       6.26
 CFC-113          1972.0    35000.0     6658.7    32029.1       7.09     1749.1    31571.0    35000.0    38429.1   193421.8  -365353.0     4447.7   392107.1     1052.6    30046.8    31997.3    34173.6       0.00       7.09       7.09       7.09
 CFC-113          1973.0    40000.0     9629.5    36685.0       8.05     1998.9    36081.2    40000.0    43918.9   191502.7  -358583.4     7389.5   391226.1     1203.9    34418.3    36648.8    39137.8       0.00       8.05       8.05       8.05
 CFC-113          1974.0    45900.0    12944.6    42027.6       9.14     2293.8    41403.1    45900.0    50397.0   189313.3  -351081.5    10682.9   390163.8     1377.5    39434.8    41986.2    44834.0       0.00       9.14       9.14       9.14
 CFC-113          1975.0    52600.0    16817.0    48201.4      10.40     2628.6    47446.7    52600.0    57753.4   186809.1  -342409.3    14609.1   389131.0     1578.0    45231.4    48153.9    51415.8       0.00      10.40      10.40      10.40
 CFC-113          1976.0    60200.0    21215.6    55206.6      11.84     3008.4    54302.1    60200.0    66098.0   183947.2  -332435.3    18937.9   387898.3     1805.8    51808.1    55151.9    58885.0       0.00      11.84      11.84      11.84
 CFC-113          1977.0    69000.0    26209.0    63239.7      13.49     3448.2    62240.0    69000.0    75760.2   180681.5  -320958.9    23874.7   386613.1     2067.0    59350.4    63177.6    67450.1       0.00      13.49      13.49      13.49
 CFC-113          1978.0    79000.0    31969.3    41808.3      15.39     3947.9    71260.3    79000.1    86739.9   176953.0  -307790.4    29618.7   385123.5     1545.6    38890.2    41766.2    44948.1       0.00      15.39      15.39      15.39
 CFC-113          1979.0    90500.0    69160.9    81263.5      16.57     4522.6    81633.6    90500.1    99366.6   173114.4  -262826.1    66738.8   414967.2     2639.4    76297.1    81185.3    86637.9       0.00      16.57      16.57      16.57
 CFC-113          1980.0   103667.0    78397.4    82325.1      19.01     5180.6    93510.6   103667.1   113823.6   168323.1  -244080.1    76022.4   414954.9     2723.7    77194.3    82242.7    87871.2       0.00      19.01      19.01      19.01
 CFC-113          1981.0   108536.0    99739.3   125526.2      21.46     5423.9    97902.6   108536.1   119169.7   163012.3  -212327.5    97247.2   425933.8     3995.0   118022.3   125409.7   133676.4       0.00      21.46      21.46      21.46
 CFC-113          1982.0   112987.0    82749.1   131272.1      25.28     5646.3   101917.5   112987.1   124056.8   156918.2  -217177.1    80299.0   397193.4     4232.8   123315.4   131145.7   139899.0       0.00      25.28      25.28      25.28
 CFC-113          1983.0   132743.0    64464.1   110991.9      29.24     6633.6   119738.0   132743.1   145748.3   150524.5  -222677.8    61991.5   366631.3     3761.2   103900.1   110881.7   118639.5       0.00      29.24      29.24      29.24
 CFC-113          1984.0   171122.0    86215.2   160252.3      32.50     8551.5   154357.0   171122.1   187887.5   143662.6  -187309.3    83737.3   375550.5     5201.3   150467.2   160098.6   170840.1       0.00      32.50      32.50      32.50
 CFC-113          1985.0   187011.0    97084.9   159013.7      37.32     9345.6   168689.3   187011.1   205333.2   134913.1  -158880.9    94390.9   369376.0     5275.0   149078.0   158853.3   169752.8       0.00      37.32      37.32      37.32
 CFC-113          1986.0   220687.0   125082.2   181016.9      42.05    11028.5   199066.1   220687.1   242308.5   125698.6  -112309.6   122275.1   379372.5     5994.5   169725.5   180835.0   193223.5       0.00      42.05      42.05      42.05
 CFC-113          1987.0   226914.3   164752.3   233413.3      47.43    11339.7   204683.3   226914.5   249146.0   115328.3   -51626.0   161717.1   398901.4     7577.8   219156.1   233189.8   248841.4       0.00      47.43      47.43      47.43
 CFC-113          1988.0   233141.7   158253.3   229740.1      54.44    11650.9   210300.5   233141.8   255983.4   104444.8   -36197.0   154942.6   371448.7     7633.7   215358.6   229509.8   245280.1       0.00      54.44      54.44      54.44
 CFC-113          1989.0   239369.0   161654.9   218087.2      61.27    11962.1   215917.8   239369.2   262820.9    93857.0   -11377.4   158064.8   354246.4     7491.6   203962.2   217876.8   233312.6       0.00      61.27      61.27      61.27
 CFC-113          1990.0   196121.0   182936.7   213502.3      67.64     9800.8   176906.8   196121.1   215335.7    83906.8    30640.3   178892.9   356669.7     7551.7   199265.6   213291.9   228859.7       0.00      67.64      67.64      67.64
 CFC-113          1991.0   150900.0   165555.4   177107.2      73.80     7541.0   136116.2   150900.1   165684.2    75563.5    30539.1   161265.6   323146.4     6840.1   164157.2   176928.2   190975.7       0.00      73.80      73.80      73.80
 CFC-113          1992.0   111447.0   139348.1   116631.6      78.72     5569.4   100528.4   111447.1   122365.9    68715.5    18153.3   134745.0   283495.1     5720.0   105732.8   116519.3   128156.3       0.00      78.72      78.72      78.72
 CFC-113          1993.0    55874.0   134163.5    68167.3      81.63     2792.2    50400.0    55874.0    61348.2    62962.5    24465.6   129367.0   266831.7     5074.7    58405.3    68100.1    78313.6       0.00      81.63      81.63      81.63
 CFC-113          1994.0    23700.7   121870.2    47110.8      82.96     1184.4    21378.7    23700.7    26022.7    57904.2    22164.3   117006.1   244521.1     4908.1    37622.1    47071.5    56871.8       0.00      82.96      82.96      82.96
 CFC-113          1995.0    25908.1    98460.2    30790.7      83.59     1294.7    23369.9    25908.1    28446.4    53068.3     8204.8    93587.1   211638.8     4810.9    21435.4    30766.8    40300.5       0.00      83.59      83.59      83.59
 CFC-113          1996.0     6872.7    93577.6    24279.2      83.69      343.5     6199.4     6872.7     7546.0    48281.9    12678.9    88719.6   197241.5     4777.2    14979.1    24261.1    33707.5       0.00      83.69      83.69      83.69
 CFC-113          1997.0     7106.1    76171.1    19766.7      83.57      355.1     6409.9     7106.1     7802.3    43579.6     4502.9    71336.7   170461.4     4748.3    10510.9    19752.2    29138.6       0.00      83.57      83.57      83.57
 CFC-113          1998.0     5283.3    63510.5    14612.8      83.32      264.0     4765.7     5283.3     5800.9    38915.1     1117.8    58722.3   148446.3     4708.9     5414.8    14598.5    23895.1       0.00      83.32      83.32      83.32
 CFC-113          1999.0     6135.4    54180.9    10278.0      82.90      306.6     5534.3     6135.4     6736.5    34307.4      875.3    49441.6   129878.8     4618.5     1121.6    10249.0    19460.6       0.00      82.90      82.90      82.90
 CFC-113          2000.0     6642.7    50038.3    11554.9      82.34      332.0     5991.9     6642.7     7293.5    29796.2     5271.1    45374.5   116614.6     4622.0     2469.8    11537.5    20699.8       0.01      82.34      82.34      82.34
 CFC-113          2001.0     4306.0    45126.1     6179.7      81.83      215.2     3884.1     4306.0     4727.8    25335.6     8591.7    40557.8   102597.6     4227.6        0.0     5966.2    15022.7       0.01      81.83      81.83      81.83
 CFC-113          2002.0     3698.3    43252.3     1780.8      81.16      184.8     3336.0     3698.3     4060.7    21234.7    12760.4    39021.2    92022.0     2636.9        0.0        0.0     8878.4       0.04      81.15      81.15      81.25
 CFC-113          2003.0     3197.1    45169.9     5794.7      80.35      159.8     2883.9     3197.1     3510.3    18826.6    16472.1    42392.0    86955.7     4102.7        0.0     5554.4    14437.4       0.11      80.28      80.28      80.67
 CFC-113          2004.0     1556.3    42572.2     2491.7      79.67       77.8     1403.8     1556.3     1708.8    14924.5    19478.7    40221.2    75945.9     3035.4        0.0     1272.4    10057.8       0.14      79.60      79.60      80.09
 CFC-113          2005.0      770.6    41636.8     7184.7      78.90       38.5      695.1      770.6      846.1    12191.7    21028.4    40451.2    67898.8     4228.7        0.0     7076.8    15805.5       0.21      78.79      78.79      79.52
 CFC-113          2006.0       55.0    35222.7     8778.3      78.29        2.7       49.6       55.0       60.4     8517.2    20439.6    34471.1    53602.5     4317.1      127.8     8735.4    17412.6       0.22      78.17      78.18      78.95
 CFC-113          2007.0      150.0    26499.5     2137.5      77.74        7.5      135.3      150.0      164.7     5657.6    15873.6    26325.0    38084.7     2798.5        0.0      746.7     9310.9       0.23      77.62      77.62      78.39
 CFC-113          2008.0      146.6    24512.0     7105.3      76.97        7.3      132.2      146.6      161.0     4899.8    14906.0    24512.1    34118.1     4132.7        0.0     7005.9    15516.2       0.30      76.81      76.82      77.83
 CFC-113          2009.0      130.0    17553.3     2267.0      76.38        6.5      117.3      130.0      142.7     6392.5     4857.0    17616.3    29826.4      849.4      461.6     2258.9     3925.9       0.31      76.22      76.22      77.27
 CFC-113          2010.0      120.0    15416.3     1931.5      75.64        6.0      108.2      120.0      131.8     6319.7     3701.6    15180.8    28286.1      663.7      414.4     1945.9     3194.2       0.41      75.19      75.49      76.75
 CFC-113          2011.0        0.0    13604.8     1639.0      74.89        0.0        0.0        0.0        0.0     6255.6     2812.7    13096.4    27068.6      543.1      347.7     1665.8     2633.8       0.52      74.17      74.76      76.23
 CFC-113          2012.0        0.0    11965.8     1396.8      74.14        0.0        0.0        0.0        0.0     6175.8     2060.6    11214.4    25936.0      460.5      287.3     1429.8     2216.6       0.64      73.16      74.02      75.72
 CFC-113          2013.0        0.0    10569.0     1195.4      73.40        0.0        0.0        0.0        0.0     6077.1     1501.4     9606.4    24951.8      403.3      230.3     1230.8     1900.7       0.77      72.14      73.27      75.20
 CFC-113          2014.0        0.0     9373.6     1027.1      72.65        0.0        0.0        0.0        0.0     5961.8     1095.0     8234.2    24083.0      362.3      183.2     1064.5     1653.0       0.89      71.14      72.53      74.69
 CFC-113          2015.0        0.0     8346.5      885.9      71.91        0.0        0.0        0.0        0.0     5834.2      794.9     7051.7    23297.9      331.8      141.5      923.0     1458.0       1.01      70.15      71.79      74.18
 CFC-113          2016.0        0.0     7460.5      767.0      71.17        0.0        0.0        0.0        0.0     5698.6      577.1     6045.5    22581.9      307.5      107.0      800.7     1298.9       1.13      69.16      71.06      73.67
 CFC-113          2017.0        0.0     6693.6      666.3      70.44        0.0        0.0        0.0        0.0     5559.0      416.7     5181.8    21899.5      287.3       79.2      693.3     1168.0       1.25      68.19      70.32      73.16
 CFC-113          2018.0        0.0     6027.3      580.9      69.71        0.0        0.0        0.0        0.0     5418.2      299.9     4444.5    21236.7      269.6       57.9      598.8     1058.4       1.37      67.23      69.60      72.66
 CFC-113          2019.0        0.0     5446.4      508.1      68.98        0.0        0.0        0.0        0.0     5278.8      215.6     3812.6    20628.5      253.6       41.9      516.1      965.9       1.49      66.28      68.87      72.16
 CFC-113          2020.0        0.0     4938.3      445.9      68.27        0.0        0.0        0.0        0.0     5142.5      155.7     3268.3    20046.1      238.8       30.1      443.9      886.7       1.60      65.34      68.15      71.66
 CFC-113          2021.0        0.0     4492.4      392.5      67.55        0.0        0.0        0.0        0.0     5010.5      112.0     2805.5    19480.9      225.1       21.7      381.6      818.0       1.71      64.42      67.44      71.17
 CFC-113          2022.0        0.0     4099.9      346.5      66.85        0.0        0.0        0.0        0.0     4883.7       80.2     2406.5    18937.9      212.2       15.4      327.7      758.2       1.82      63.50      66.73      70.67
 CFC-113          2023.0        0.0     3753.5      306.8      66.15        0.0        0.0        0.0        0.0     4762.4       57.5     2063.6    18446.2      200.0       11.0      281.1      706.1       1.93      62.60      66.03      70.18
 CFC-113          2024.0        0.0     3446.7      272.4      65.45        0.0        0.0        0.0        0.0     4647.2       41.4     1771.8    17958.5      188.6        7.8      241.4      659.9       2.03      61.71      65.33      69.69
 CFC-113          2025.0        0.0     3174.3      242.5      64.76        0.0        0.0        0.0        0.0     4537.9       29.7     1520.7    17492.9      177.9        5.5      207.3      619.4       2.13      60.84      64.64      69.21
 CFC-113          2026.0        0.0     2931.8      216.5      64.08        0.0        0.0        0.0        0.0     4434.5       21.3     1305.1    17056.5      167.9        3.9      178.2      582.4       2.23      59.97      63.95      68.73
 CFC-113          2027.0        0.0     2715.3      193.8      63.41        0.0        0.0        0.0        0.0     4337.0       15.3     1120.2    16598.2      158.4        2.8      153.0      548.9       2.32      59.12      63.28      68.25
 CFC-113          2028.0        0.0     2521.5      173.8      62.74        0.0        0.0        0.0        0.0     4245.2       11.0      961.5    16195.3      149.6        2.0      131.4      518.8       2.42      58.28      62.60      67.78
 CFC-113          2029.0        0.0     2347.7      156.3      62.08        0.0        0.0        0.0        0.0     4158.7        7.9      824.6    15766.0      141.3        1.4      112.8      491.3       2.51      57.45      61.94      67.31
 CFC-113          2030.0        0.0     2191.3      140.9      61.43        0.0        0.0        0.0        0.0     4077.4        5.7      707.7    15352.9      133.5        1.0       96.8      465.9       2.60      56.63      61.28      66.84
 CFC-113          2031.0        0.0     2050.4      127.3      60.78        0.0        0.0        0.0        0.0     4000.9        4.1      607.6    14964.0      126.3        0.7       83.1      443.1       2.69      55.82      60.63      66.37
 CFC-113          2032.0        0.0     1923.0      115.3      60.14        0.0        0.0        0.0        0.0     3929.0        2.9      521.2    14546.8      119.5        0.5       71.3      421.5       2.77      55.03      59.98      65.91
 CFC-113          2033.0        0.0     1807.7      104.6      59.50        0.0        0.0        0.0        0.0     3861.4        2.1      447.3    14177.1      113.1        0.3       61.1      401.5       2.85      54.25      59.35      65.45
 CFC-113          2034.0        0.0     1703.1       95.2      58.88        0.0        0.0        0.0        0.0     3797.8        1.5      383.9    13827.3      107.2        0.2       52.4      383.0       2.93      53.47      58.71      64.99
 CFC-113          2035.0        0.0     1607.9       86.7      58.25        0.0        0.0        0.0        0.0     3737.9        1.1      329.4    13432.9      101.7        0.2       45.0      365.7       3.01      52.71      58.09      64.54
 CFC-113          2036.0        0.0     1521.2       79.2      57.64        0.0        0.0        0.0        0.0     3681.6        0.8      282.7    13082.8       96.5        0.1       38.6      349.2       3.09      51.96      57.47      64.08
 CFC-113          2037.0        0.0     1442.0       72.4      57.03        0.0        0.0        0.0        0.0     3628.5        0.6      242.6    12723.3       91.7        0.1       33.1      334.0       3.16      51.22      56.85      63.63
 CFC-113          2038.0        0.0     1369.6       66.4      56.43        0.0        0.0        0.0        0.0     3578.4        0.4      208.2    12377.3       87.1        0.1       28.4      319.7       3.23      50.49      56.25      63.19
 CFC-113          2039.0        0.0     1303.3       60.9      55.83        0.0        0.0        0.0        0.0     3531.2        0.3      178.7    12046.0       82.9        0.0       24.3      306.4       3.30      49.77      55.65      62.75
 CFC-113          2040.0        0.0     1242.4       56.0      55.25        0.0        0.0        0.0        0.0     3486.7        0.2      153.3    11723.1       79.0        0.0       20.9      294.0       3.37      49.06      55.05      62.31
 CFC-113          2041.0        0.0     1186.3       51.6      54.66        0.0        0.0        0.0        0.0     3444.5        0.1      131.6    11419.7       75.2        0.0       17.9      282.1       3.44      48.37      54.47      61.87
 CFC-113          2042.0        0.0     1134.7       47.6      54.09        0.0        0.0        0.0        0.0     3404.7        0.1      113.0    11134.4       71.8        0.0       15.3      270.8       3.50      47.68      53.88      61.44
 CFC-113          2043.0        0.0     1087.1       44.0      53.52        0.0        0.0        0.0        0.0     3367.0        0.1       96.9    10851.0       68.5        0.0       13.1      260.1       3.57      47.00      53.31      61.01
 CFC-113          2044.0        0.0     1043.0       40.8      52.95        0.0        0.0        0.0        0.0     3331.3        0.1       83.1    10573.9       65.5        0.0       11.3      249.7       3.63      46.33      52.74      60.58
 CFC-113          2045.0        0.0     1002.3       37.8      52.39        0.0        0.0        0.0        0.0     3297.4        0.0       71.3    10305.3       62.6        0.0        9.6      239.9       3.69      45.67      52.17      60.15
 CFC-113          2046.0        0.0      964.4       35.1      51.84        0.0        0.0        0.0        0.0     3265.2        0.0       61.2    10025.9       59.9        0.0        8.3      230.8       3.74      45.02      51.62      59.73
 CFC-113          2047.0        0.0      929.3       32.6      51.29        0.0        0.0        0.0        0.0     3234.7        0.0       52.5     9762.1       57.3        0.0        7.1      222.1       3.80      44.38      51.07      59.31
 CFC-113          2048.0        0.0      896.7       30.4      50.75        0.0        0.0        0.0        0.0     3205.6        0.0       45.1     9494.3       55.0        0.0        6.1      213.6       3.86      43.75      50.52      58.90
 CFC-113          2049.0        0.0      866.3       28.4      50.22        0.0        0.0        0.0        0.0     3177.9        0.0       38.7     9229.9       52.7        0.0        5.2      205.5       3.91      43.12      49.98      58.48
 CFC-113          2050.0        0.0      837.9       26.5      49.69        0.0        0.0        0.0        0.0     3151.6        0.0       33.2     8993.7       50.6        0.0        4.5      197.7       3.96      42.51      49.45      58.07
 CFC-113          2051.0        0.0      811.4       24.8      49.17        0.0        0.0        0.0        0.0     3126.5        0.0       28.5     8752.2       48.6        0.0        3.8      190.4       4.01      41.91      48.92      57.66
 CFC-113          2052.0        0.0      786.7       23.2      48.65        0.0        0.0        0.0        0.0     3102.5        0.0       24.4     8516.0       46.7        0.0        3.3      183.6       4.06      41.31      48.39      57.25
 CFC-113          2053.0        0.0      763.5       21.7      48.14        0.0        0.0        0.0        0.0     3079.6        0.0       21.0     8289.8       44.9        0.0        2.8      176.9       4.10      40.72      47.88      56.85
 CFC-113          2054.0        0.0      741.7       20.4      47.63        0.0        0.0        0.0        0.0     3057.7        0.0       18.0     8061.1       43.3        0.0        2.4      170.6       4.15      40.14      47.36      56.45
 CFC-113          2055.0        0.0      721.3       19.2      47.13        0.0        0.0        0.0        0.0     3036.7        0.0       15.4     7866.2       41.7        0.0        2.1      164.5       4.19      39.57      46.86      56.05
 CFC-113          2056.0        0.0      702.2       18.0      46.63        0.0        0.0        0.0        0.0     3016.6        0.0       13.3     7647.4       40.2        0.0        1.8      159.0       4.24      39.01      46.36      55.66
 CFC-113          2057.0        0.0      684.1       17.0      46.14        0.0        0.0        0.0        0.0     2997.4        0.0       11.4     7442.4       38.7        0.0        1.5      153.6       4.28      38.45      45.86      55.26
 CFC-113          2058.0        0.0      667.1       16.0      45.66        0.0        0.0        0.0        0.0     2978.9        0.0        9.8     7237.5       37.4        0.0        1.3      148.4       4.32      37.90      45.37      54.87
 CFC-113          2059.0        0.0      651.1       15.1      45.18        0.0        0.0        0.0        0.0     2961.2        0.0        8.4     7051.2       36.1        0.0        1.1      143.4       4.36      37.36      44.89      54.49
 CFC-113          2060.0        0.0      635.9       14.3      44.70        0.0        0.0        0.0        0.0     2944.1        0.0        7.2     6856.8       34.9        0.0        1.0      138.8       4.39      36.83      44.41      54.10
 CFC-113          2061.0        0.0      621.6       13.5      44.23        0.0        0.0        0.0        0.0     2927.8        0.0        6.2     6676.8       33.7        0.0        0.8      134.4       4.43      36.31      43.93      53.72
 CFC-113          2062.0        0.0      608.1       12.8      43.77        0.0        0.0        0.0        0.0     2912.0        0.0        5.3     6491.4       32.6        0.0        0.7      130.2       4.47      35.79      43.46      53.34
 CFC-113          2063.0        0.0      595.3       12.1      43.31        0.0        0.0        0.0        0.0     2896.8        0.0        4.6     6316.1       31.6        0.0        0.6      126.0       4.50      35.28      43.00      52.97
 CFC-113          2064.0        0.0      583.2       11.5      42.85        0.0        0.0        0.0        0.0     2882.2        0.0        3.9     6147.5       30.6        0.0        0.5      121.9       4.53      34.78      42.54      52.59
 CFC-113          2065.0        0.0      571.6       10.9      42.40        0.0        0.0        0.0        0.0     2868.1        0.0        3.4     5985.5       29.7        0.0        0.4      117.9       4.56      34.28      42.08      52.22
 CFC-113          2066.0        0.0      560.7       10.4      41.96        0.0        0.0        0.0        0.0     2854.5        0.0        2.9     5826.1       28.8        0.0        0.4      114.1       4.59      33.79      41.63      51.85
 CFC-113          2067.0        0.0      550.3        9.9      41.52        0.0        0.0        0.0        0.0     2841.4        0.0        2.5     5665.7       27.9        0.0        0.3      110.5       4.62      33.31      41.19      51.48
 CFC-113          2068.0        0.0      540.4        9.4      41.08        0.0        0.0        0.0        0.0     2828.7        0.0        2.1     5520.2       27.1        0.0        0.3      106.8       4.65      32.84      40.75      51.12
 CFC-113          2069.0        0.0      531.0        9.0      40.65        0.0        0.0        0.0        0.0     2816.4        0.0        1.8     5363.3       26.3        0.0        0.2      103.5       4.68      32.37      40.31      50.76
 CFC-113          2070.0        0.0      522.0        8.6      40.23        0.0        0.0        0.0        0.0     2804.5        0.0        1.6     5223.2       25.5        0.0        0.2      100.2       4.70      31.91      39.88      50.40
 CFC-113          2071.0        0.0      513.4        8.2      39.81        0.0        0.0        0.0        0.0     2793.0        0.0        1.3     5082.7       24.8        0.0        0.2       97.1       4.73      31.45      39.45      50.04
 CFC-113          2072.0        0.0      505.3        7.8      39.39        0.0        0.0        0.0        0.0     2781.9        0.0        1.2     4941.7       24.1        0.0        0.2       94.2       4.75      31.01      39.03      49.69
 CFC-113          2073.0        0.0      497.4        7.5      38.98        0.0        0.0        0.0        0.0     2771.1        0.0        1.0     4803.9       23.5        0.0        0.1       91.1       4.78      30.56      38.61      49.33
 CFC-113          2074.0        0.0      490.0        7.1      38.57        0.0        0.0        0.0        0.0     2760.7        0.0        0.8     4667.1       22.9        0.0        0.1       88.2       4.80      30.13      38.20      48.98
 CFC-113          2075.0        0.0      482.8        6.8      38.16        0.0        0.0        0.0        0.0     2750.5        0.0        0.7     4539.2       22.3        0.0        0.1       85.4       4.82      29.70      37.79      48.64
 CFC-113          2076.0        0.0      476.0        6.6      37.77        0.0        0.0        0.0        0.0     2740.7        0.0        0.6     4417.0       21.7        0.0        0.1       82.5       4.84      29.28      37.39      48.29
 CFC-113          2077.0        0.0      469.4        6.3      37.37        0.0        0.0        0.0        0.0     2731.1        0.0        0.5     4300.7       21.1        0.0        0.1       79.9       4.86      28.86      36.99      47.95
 CFC-113          2078.0        0.0      463.1        6.0      36.98        0.0        0.0        0.0        0.0     2721.8        0.0        0.5     4179.7       20.6        0.0        0.1       77.4       4.88      28.45      36.59      47.61
 CFC-113          2079.0        0.0      457.1        5.8      36.59        0.0        0.0        0.0        0.0     2712.8        0.0        0.4     4073.7       20.1        0.0        0.1       75.0       4.89      28.04      36.20      47.27
 CFC-113          2080.0        0.0      451.3        5.6      36.21        0.0        0.0        0.0        0.0     2704.0        0.0        0.3     3967.8       19.6        0.0        0.0       72.5       4.91      27.65      35.81      46.94
 CFC-113          2081.0        0.0      445.8        5.3      35.83        0.0        0.0        0.0        0.0     2695.5        0.0        0.3     3855.9       19.2        0.0        0.0       70.3       4.92      27.25      35.43      46.61
 CFC-113          2082.0        0.0      440.4        5.1      35.46        0.0        0.0        0.0        0.0     2687.1        0.0        0.3     3754.0       18.7        0.0        0.0       68.0       4.94      26.86      35.05      46.27
 CFC-113          2083.0        0.0      435.3        5.0      35.09        0.0        0.0        0.0        0.0     2679.1        0.0        0.2     3651.7       18.3        0.0        0.0       65.8       4.95      26.48      34.68      45.94
 CFC-113          2084.0        0.0      430.3        4.8      34.72        0.0        0.0        0.0        0.0     2671.2        0.0        0.2     3555.9       17.9        0.0        0.0       63.7       4.97      26.10      34.31      45.62
 CFC-113          2085.0        0.0      425.6        4.6      34.36        0.0        0.0        0.0        0.0     2663.5        0.0        0.2     3458.1       17.5        0.0        0.0       61.7       4.98      25.73      33.94      45.30
 CFC-113          2086.0        0.0      421.0        4.4      34.00        0.0        0.0        0.0        0.0     2656.0        0.0        0.1     3373.0       17.1        0.0        0.0       59.7       4.99      25.37      33.58      44.97
 CFC-113          2087.0        0.0      416.5        4.3      33.65        0.0        0.0        0.0        0.0     2648.7        0.0        0.1     3283.1       16.7        0.0        0.0       57.7       5.00      25.00      33.22      44.65
 CFC-113          2088.0        0.0      412.2        4.1      33.30        0.0        0.0        0.0        0.0     2641.6        0.0        0.1     3196.5       16.3        0.0        0.0       55.8       5.01      24.65      32.86      44.34
 CFC-113          2089.0        0.0      408.1        4.0      32.95        0.0        0.0        0.0        0.0     2634.6        0.0        0.1     3115.0       16.0        0.0        0.0       53.9       5.02      24.30      32.51      44.02
 CFC-113          2090.0        0.0      404.1        3.9      32.61        0.0        0.0        0.0        0.0     2627.8        0.0        0.1     3030.9       15.7        0.0        0.0       52.1       5.03      23.95      32.16      43.71
 CFC-113          2091.0        0.0      400.3        3.7      32.27        0.0        0.0        0.0        0.0     2621.2        0.0        0.1     2948.5       15.3        0.0        0.0       50.4       5.04      23.61      31.82      43.40
 CFC-113          2092.0        0.0      396.6        3.6      31.93        0.0        0.0        0.0        0.0     2614.7        0.0        0.1     2868.4       15.0        0.0        0.0       48.7       5.05      23.27      31.48      43.09
 CFC-113          2093.0        0.0      393.0        3.5      31.60        0.0        0.0        0.0        0.0     2608.4        0.0        0.0     2788.6       14.7        0.0        0.0       47.2       5.05      22.94      31.14      42.79
 CFC-113          2094.0        0.0      389.5        3.4      31.27        0.0        0.0        0.0        0.0     2602.2        0.0        0.0     2711.7       14.4        0.0        0.0       45.6       5.06      22.62      30.81      42.48
 CFC-113          2095.0        0.0      386.1        3.3      30.95        0.0        0.0        0.0        0.0     2596.1        0.0        0.0     2641.0       14.2        0.0        0.0       44.1       5.06      22.29      30.48      42.18
 CFC-113          2096.0        0.0      382.8        3.2      30.62        0.0        0.0        0.0        0.0     2590.2        0.0        0.0     2569.1       13.9        0.0        0.0       42.6       5.07      21.98      30.15      41.88
 CFC-113          2097.0        0.0      379.7        3.1      30.31        0.0        0.0        0.0        0.0     2584.4        0.0        0.0     2499.2       13.6        0.0        0.0       41.2       5.07      21.66      29.83      41.59
 CFC-113          2098.0        0.0      376.6        3.0      29.99        0.0        0.0        0.0        0.0     2578.7        0.0        0.0     2431.4       13.4        0.0        0.0       39.9       5.08      21.35      29.51      41.29
 CFC-113          2099.0        0.0      373.6        2.9      29.68        0.0        0.0        0.0        0.0     2573.2        0.0        0.0     2363.2       13.1        0.0        0.0       38.6       5.08      21.05      29.19      41.00
 CFC-113          2100.0        0.0      370.7        2.8      29.37        0.0        0.0        0.0        0.0     2567.8        0.0        0.0     2300.2       12.9        0.0        0.0       37.3       5.08      20.75      28.88      40.71
 CFC-113          2101.0        0.0      367.9        2.7      29.07        0.0        0.0        0.0        0.0     2562.4        0.0        0.0     2237.9       12.7        0.0        0.0       36.0       5.08      20.46      28.57      40.42
 CFC-113          2102.0        0.0      365.2        2.6      28.76        0.0        0.0        0.0        0.0     2557.2        0.0        0.0     2178.2       12.4        0.0        0.0       34.9       5.09      20.16      28.27      40.13
 CFC-113          2103.0        0.0      362.5        2.6      28.47        0.0        0.0        0.0        0.0     2552.1        0.0        0.0     2119.1       12.2        0.0        0.0       33.7       5.09      19.88      27.97      39.84
 CFC-113          2104.0        0.0      359.9        2.5      28.17        0.0        0.0        0.0        0.0     2547.1        0.0        0.0     2061.1       12.0        0.0        0.0       32.6       5.09      19.59      27.67      39.56
 CFC-113          2105.0        0.0      357.4        2.4      27.88        0.0        0.0        0.0        0.0     2542.2        0.0        0.0     2005.6       11.8        0.0        0.0       31.6       5.09      19.31      27.37      39.28
 CFC-113          2106.0        0.0      355.0        2.4      27.59        0.0        0.0        0.0        0.0     2537.4        0.0        0.0     1953.0       11.6        0.0        0.0       30.5       5.09      19.04      27.08      39.00
 CFC-113          2107.0        0.0      352.6        2.3      27.30        0.0        0.0        0.0        0.0     2532.6        0.0        0.0     1897.5       11.4        0.0        0.0       29.5       5.08      18.77      26.79      38.72
 CFC-113          2108.0        0.0      350.3        2.2      27.02        0.0        0.0        0.0        0.0     2528.0        0.0        0.0     1845.9       11.2        0.0        0.0       28.5       5.08      18.50      26.50      38.45
 CFC-113          2109.0        0.0      348.1        2.2      26.74        0.0        0.0        0.0        0.0     2523.5        0.0        0.0     1794.9       11.0        0.0        0.0       27.7       5.08      18.24      26.22      38.17
 CFC-113          2110.0        0.0      345.9        2.1      26.46        0.0        0.0        0.0        0.0     2519.0        0.0        0.0     1746.9       10.9        0.0        0.0       26.7       5.08      17.98      25.94      37.90
 CFC-113          2111.0        0.0      343.8        2.1      26.19        0.0        0.0        0.0        0.0     2514.6        0.0        0.0     1699.5       10.7        0.0        0.0       25.9       5.08      17.72      25.66      37.63
 CFC-113          2112.0        0.0      341.7        2.0      25.92        0.0        0.0        0.0        0.0     2510.3        0.0        0.0     1654.0       10.5        0.0        0.0       25.0       5.07      17.47      25.39      37.37
 CFC-113          2113.0        0.0      339.7        2.0      25.65        0.0        0.0        0.0        0.0     2506.1        0.0        0.0     1609.2       10.4        0.0        0.0       24.2       5.07      17.22      25.11      37.10
 CFC-113          2114.0        0.0      337.7        1.9      25.39        0.0        0.0        0.0        0.0     2501.9        0.0        0.0     1566.7       10.2        0.0        0.0       23.3       5.06      16.98      24.85      36.84
 CFC-113          2115.0        0.0      335.8        1.9      25.12        0.0        0.0        0.0        0.0     2497.8        0.0        0.0     1526.2       10.0        0.0        0.0       22.6       5.06      16.73      24.58      36.57
 CFC-113          2116.0        0.0      333.9        1.8      24.86        0.0        0.0        0.0        0.0     2493.8        0.0        0.0     1484.7        9.9        0.0        0.0       21.8       5.05      16.50      24.32      36.31
 CFC-113          2117.0        0.0      332.0        1.8      24.61        0.0        0.0        0.0        0.0     2489.9        0.0        0.0     1444.8        9.8        0.0        0.0       21.1       5.05      16.26      24.06      36.05
 CFC-113          2118.0        0.0      330.2        1.8      24.35        0.0        0.0        0.0        0.0     2486.0        0.0        0.0     1404.9        9.6        0.0        0.0       20.4       5.04      16.03      23.80      35.80
 CFC-113          2119.0        0.0      328.5        1.7      24.10        0.0        0.0        0.0        0.0     2482.2        0.0        0.0     1366.6        9.5        0.0        0.0       19.7       5.04      15.80      23.55      35.54
 CFC-113          2120.0        0.0      326.8        1.7      23.85        0.0        0.0        0.0        0.0     2478.5        0.0        0.0     1329.3        9.3        0.0        0.0       19.0       5.03      15.58      23.29      35.29
 
 Species            Year  Prod_mean  Bank_mean  Emis_mean   Mix_mean  Prod_stdv  Prod_2.5p   Prod_50p Prod_97.5p  Bank_stdv  Bank_2.5p   Bank_50p Bank_97.5p  Emis_stdv  Emis_2.5p   Emis_50p Emis_97.5p   Mix_stdv   Mix_2.5p    Mix_50p  Mix_97.5p
 CFC-114          1950.0        0.0    78467.5    13808.3       1.13        0.0        0.0        0.0        0.0    29616.6    20925.8    78382.8   137161.7      415.8    13028.7    13795.9    14658.6       0.00       1.13       1.13       1.13
 CFC-114          1951.0     5000.0    64659.2     7204.1       1.61      249.9     4510.1     5000.0     5489.9    29390.9     7560.0    64592.3   122904.9      218.7     6793.5     7197.8     7651.2       0.00       1.61       1.61       1.61
 CFC-114          1952.0     5200.0    62455.1     7404.3       1.86      259.9     4690.5     5200.0     5709.5    29074.8     5975.9    62384.4   120081.2      225.3     6981.3     7397.9     7864.5       0.00       1.86       1.86       1.86
 CFC-114          1953.0     5400.0    60250.8     7560.2       2.11      269.9     4871.0     5400.0     5929.1    28746.6     4397.3    60174.7   117231.9      230.7     7126.9     7553.5     8031.2       0.00       2.11       2.11       2.11
 CFC-114          1954.0     5600.0    58090.6     7574.7       2.37      279.9     5051.4     5600.0     6148.7    28407.0     2881.1    58004.9   114387.0      231.9     7138.9     7568.0     8048.5       0.00       2.37       2.37       2.37
 CFC-114          1955.0     5800.0    56115.9     7546.2       2.62      289.8     5231.8     5800.0     6368.3    28058.2     1570.2    56040.1   111716.7      232.0     7110.6     7539.6     8020.1       0.00       2.62       2.62       2.62
 CFC-114          1956.0     6000.0    54369.6     7473.6       2.88      299.8     5412.2     6000.0     6587.9    27700.8      509.8    54291.6   109238.6      230.9     7040.1     7467.2     7945.1       0.00       2.88       2.88       2.88
 CFC-114          1957.0     6300.0    52896.0     7435.1       3.13      314.8     5682.8     6300.0     6917.2    27335.6     -228.8    52814.9   107025.8      230.8     7001.7     7428.7     7906.4       0.00       3.13       3.13       3.13
 CFC-114          1958.0     6500.0    51760.9     7420.3       3.37      324.8     5863.2     6500.0     7136.8    26958.1     -633.3    51683.2   105142.7      231.5     6985.2     7414.0     7893.2       0.00       3.37       3.37       3.37
 CFC-114          1959.0     6700.0    50840.6     6544.2       3.62      334.8     6043.6     6700.0     7356.4    26571.9     -831.9    50760.6   103460.2      207.6     6154.0     6538.5     6968.0       0.00       3.62       3.62       3.62
 CFC-114          1960.0     7000.0    50996.5     6822.9       3.83      349.8     6314.2     7000.0     7685.8    26190.2       74.0    50919.2   102870.1      216.7     6415.4     6816.9     7265.5       0.00       3.83       3.83       3.83
 CFC-114          1961.0     7300.0    51173.6     7115.8       4.05      364.8     6584.8     7300.0     8015.2    25791.6     1039.0    51097.5   102283.8      226.4     6690.2     7109.6     7578.2       0.00       4.05       4.05       4.05
 CFC-114          1962.0     7600.0    51357.8     7417.2       4.28      379.8     6855.4     7600.0     8344.6    25376.0     2020.6    51284.9   101671.9      236.3     6972.8     7410.8     7900.0       0.00       4.28       4.28       4.28
 CFC-114          1963.0     7800.0    51540.5     7683.6       4.52      389.8     7035.8     7800.0     8564.2    24943.3     3043.3    51467.3   101002.8      245.3     7222.0     7676.9     8184.8       0.00       4.52       4.52       4.52
 CFC-114          1964.0     8100.0    51656.9     7969.6       4.77      404.8     7306.4     8100.0     8893.6    24497.7     4025.0    51591.6   100238.3      254.9     7490.0     7962.6     8490.4       0.00       4.77       4.77       4.77
 CFC-114          1965.0     8400.0    51787.4     8267.3       5.03      419.8     7577.0     8400.0     9223.0    24035.3     5076.8    51714.1    99454.8      264.9     7768.9     8260.0     8808.4       0.00       5.03       5.03       5.03
 CFC-114          1966.0     8800.0    51920.1     8612.4       5.30      439.8     7937.8     8800.0     9662.2    23555.8     6128.8    51844.7    98666.3      276.3     8092.7     8604.8     9176.5       0.00       5.30       5.30       5.30
 CFC-114          1967.0     9100.0    52107.8     8946.1       5.57      454.8     8208.5     9100.0     9991.6    23054.8     7312.4    52039.0    97834.3      287.5     8405.3     8938.2     9533.0       0.00       5.57       5.57       5.57
 CFC-114          1968.0     9500.0    52261.7     9313.2       5.86      474.7     8569.3     9500.0    10430.8    22536.3     8488.0    52183.9    96946.6      299.7     8749.6     9305.0     9925.0       0.00       5.86       5.86       5.86
 CFC-114          1969.0     9900.0    52448.5     9700.7       6.16      494.7     8930.1     9900.0    10870.0    21996.1     9704.1    52365.0    96081.7      312.5     9113.2     9692.2    10338.6       0.00       6.16       6.16       6.16
 CFC-114          1970.0    10200.0    52647.8    10060.9       6.47      509.7     9200.7    10200.0    11199.3    21434.1    11008.2    52564.2    95146.8      324.6     9450.8    10052.0    10723.7       0.00       6.47       6.47       6.47
 CFC-114          1971.0    10600.0    52786.8    10444.6       6.79      529.7     9561.5    10600.0    11638.5    20854.4    12297.0    52701.7    94126.5      337.5     9810.3    10435.3    11133.2       0.00       6.79       6.79       6.79
 CFC-114          1972.0    11100.0    52942.3    10883.0       7.13      554.7    10012.5    11100.0    12187.5    20253.2    13593.4    52855.0    93100.3      352.0    10221.5    10873.5    11601.4       0.00       7.13       7.13       7.13
 CFC-114          1973.0    11500.0    53159.3    11314.5       7.47      574.7    10373.3    11500.0    12626.7    19626.2    15064.9    53073.8    92105.8      366.4    10625.8    11304.5    12062.2       0.00       7.47       7.47       7.47
 CFC-114          1974.0    11900.0    53344.8    14564.7       7.84      594.7    10734.1    11900.0    13065.9    18977.4    16531.9    53263.5    91025.7      460.7    13699.2    14552.2    15505.3       0.00       7.84       7.84       7.84
 CFC-114          1975.0    12400.0    50680.0    15045.3       8.31      619.7    11185.1    12400.0    13614.9    18264.9    15243.0    50603.3    86954.5      477.1    14148.4    15032.1    16019.6       0.00       8.31       8.31       8.31
 CFC-114          1976.0    12900.0    48034.8    15548.9       8.80      644.7    11636.2    12900.0    14163.9    17526.7    14013.2    47956.1    82847.9      494.3    14619.4    15535.3    16558.6       0.00       8.80       8.80       8.80
 CFC-114          1977.0    13400.0    45385.9    16066.9       9.30      669.6    12087.2    13400.0    14712.9    16763.3    12844.3    45302.0    78671.3      512.0    15103.9    16052.9    17113.1       0.00       9.30       9.30       9.30
 CFC-114          1978.0    13900.0    42719.0    13981.1       9.82      694.6    12538.2    13900.0    15261.9    15975.3    11699.5    42629.4    74446.9      456.7    13122.3    13968.6    14913.2       0.00       9.82       9.82       9.82
 CFC-114          1979.0    14400.0    42637.9    13770.5      10.27      719.6    12989.2    14400.0    15810.8    15201.1    13120.3    42552.2    72816.5      454.1    12916.1    13758.0    14697.0       0.00      10.27      10.27      10.27
 CFC-114          1980.0    14994.0    43267.4    14110.9      10.70      749.3    13525.0    14994.0    16463.0    14415.3    15274.7    43186.2    71886.1      466.6    13232.6    14098.0    15063.0       0.00      10.70      10.70      10.70
 CFC-114          1981.0    14011.0    44150.6    13939.5      11.14      700.2    12638.3    14011.0    15383.7    13608.5    17730.0    44068.7    71206.1      465.3    13063.0    13926.9    14889.0       0.00      11.14      11.14      11.14
 CFC-114          1982.0    13580.0    44222.0    13561.5      11.58      678.6    12249.5    13580.0    14910.5    12841.8    19293.9    44144.3    69777.7      458.6    12697.6    13549.1    14496.5       0.00      11.58      11.58      11.58
 CFC-114          1983.0    14774.0    44240.6    14051.0      12.00      738.3    13326.6    14774.0    16221.5    12099.4    20776.2    44159.7    68326.1      475.1    13155.9    14038.2    15019.7       0.00      12.00      12.00      12.00
 CFC-114          1984.0    15573.0    44963.6    15074.0      12.43      778.2    14047.3    15573.0    17098.8    11319.9    22998.1    44869.7    67507.0      506.2    14120.6    15060.3    16107.5       0.00      12.43      12.43      12.43
 CFC-114          1985.0    17091.0    45462.6    16298.8      12.90      854.1    15416.6    17091.0    18765.5    10513.9    25051.5    45369.6    66413.1      543.1    15276.1    16284.1    17406.9       0.00      12.90      12.90      12.90
 CFC-114          1986.0    17391.0    46254.8    17818.7      13.41      869.1    15687.2    17391.0    19094.9     9666.8    27504.1    46160.4    65512.5      588.5    16711.5    17802.5    19019.5       0.00      13.41      13.41      13.41
 CFC-114          1987.0    16401.7    45827.0    17753.2      13.97      819.6    14794.8    16401.7    18008.6     8821.7    28743.5    45731.6    63367.9      590.9    16640.5    17737.1    18959.2       0.00      13.97      13.97      13.97
 CFC-114          1988.0    15412.3    44475.5    15862.9      14.53      770.2    13902.4    15412.3    16922.4     8040.9    28924.1    44391.5    60460.3      544.6    14834.7    15848.4    16974.0       0.00      14.53      14.53      14.53
 CFC-114          1989.0    14423.0    44025.0    13801.5      15.01      720.8    13010.0    14423.0    15836.1     7348.6    29813.5    43954.9    58617.3      495.7    12863.9    13789.5    14809.4       0.00      15.01      15.01      15.01
 CFC-114          1990.0    11467.0    44646.5     9861.9      15.42      573.0    10343.6    11467.0    12590.5     6746.6    31567.1    44588.5    58032.2      406.2     9088.0     9853.7    10685.1       0.00      15.42      15.42      15.42
 CFC-114          1991.0    12074.0    46251.5     6437.0      15.69      603.4    10891.1    12074.0    13257.0     6274.5    34081.2    46201.5    58700.6      341.8     5781.8     6431.9     7124.2       0.00      15.69      15.69      15.69
 CFC-114          1992.0     5947.0    51888.5     5513.9      15.84      297.2     5364.4     5947.0     6529.7     5869.5    40495.4    51840.9    63518.8      328.9     4881.9     5509.3     6173.1       0.00      15.84      15.84      15.84
 CFC-114          1993.0     5318.0    52321.6     5205.1      15.95      265.8     4797.0     5318.0     5839.0     5555.0    41516.7    52277.7    63333.3      326.0     4578.1     5200.8     5858.0       0.00      15.95      15.95      15.95
 CFC-114          1994.0     2780.0    52434.5     4876.5      16.05      138.9     2507.6     2780.0     3052.4     5262.1    42205.4    52399.6    62871.9      322.9     4255.1     4872.8     5523.3       0.00      16.05      16.05      16.05
 CFC-114          1995.0     2703.0    50338.0     4641.0      16.14      135.1     2438.2     2703.0     2967.8     4993.0    40619.4    50304.6    60239.8      321.2     4022.3     4637.5     5283.5       0.00      16.14      16.14      16.14
 CFC-114          1996.0      182.0    48400.0     4300.2      16.21        9.1      164.2      182.0      199.8     4735.3    39182.9    48371.7    57770.5      318.1     3686.9     4297.1     4935.5       0.00      16.21      16.21      16.21
 CFC-114          1997.0      302.0    44281.8     4574.6      16.28       15.1      272.4      302.0      331.6     4492.0    35514.7    44259.4    53166.8      322.6     3952.5     4571.2     5219.9       0.00      16.28      16.28      16.28
 CFC-114          1998.0      159.0    40009.1     4791.8      16.36        7.9      143.4      159.0      174.6     4256.1    31705.1    39986.6    48422.9      326.7     4162.5     4788.2     5445.6       0.00      16.36      16.36      16.36
 CFC-114          1999.0      150.0    35376.4     3929.1      16.44        7.5      135.3      150.0      164.7     4030.3    27511.2    35354.4    43327.5      317.4     3315.8     3926.5     4561.5       0.00      16.44      16.44      16.44
 CFC-114          2000.0      243.0    31597.2     3218.6      16.49       12.1      219.2      243.0      266.8     3822.0    24150.6    31579.3    39126.5      310.8     2617.1     3216.4     3837.2       0.00      16.49      16.49      16.49
 CFC-114          2001.0      275.0    28621.6     1511.5      16.52       13.7      248.1      275.0      301.9     3631.6    21543.3    28605.2    35779.3      298.9      928.9     1510.1     2102.5       0.00      16.52      16.52      16.52
 CFC-114          2002.0      385.5    27385.1     1798.1      16.49       19.3      347.7      385.5      423.3     3464.5    20620.2    27371.2    34208.3      299.8     1214.8     1796.3     2391.6       0.00      16.49      16.49      16.49
 CFC-114          2003.0      291.0    25972.5     4550.1      16.46       14.5      262.5      291.0      319.5     3315.2    19498.1    25956.4    32504.7      325.3     3922.7     4546.7     5200.7       0.00      16.46      16.46      16.46
 CFC-114          2004.0      143.7    21713.4     2799.3      16.54        7.2      129.6      143.7      157.8     3180.5    15501.7    21702.9    27964.8      307.8     2201.7     2797.3     3410.7       0.00      16.54      16.54      16.54
 CFC-114          2005.0      261.0    19057.8     1609.1      16.55       13.0      235.4      261.0      286.6     3076.0    13040.1    19048.2    25097.7      299.9     1024.9     1607.6     2202.4       0.00      16.55      16.55      16.55
 CFC-114          2006.0       98.2    17709.8     1733.8      16.52        4.9       88.6       98.2      107.8     3000.6    11831.4    17703.7    23601.5      300.0     1149.9     1732.1     2327.6       0.00      16.52      16.52      16.52
 CFC-114          2007.0      221.8    16074.2     1603.0      16.49       11.1      200.1      221.8      243.5     2953.7    10281.4    16073.1    21868.7      298.9     1020.8     1601.5     2194.3       0.00      16.49      16.49      16.49
 CFC-114          2008.0      104.8    14693.0     1558.3      16.46        5.2       94.5      104.8      115.1     2937.0     8935.1    14693.0    20451.2      298.1      977.5     1556.8     2147.9       0.00      16.46      16.46      16.46
 CFC-114          2009.0        0.0    13239.5     1322.1      16.43        0.0        0.0        0.0        0.0     2950.6     7456.6    13240.6    19031.7      308.3      752.9     1310.0     1960.9       0.00      16.43      16.43      16.43
 CFC-114          2010.0        0.0    11917.4     1181.4      16.39        0.0        0.0        0.0        0.0     2846.7     6393.3    11900.5    17545.3      259.6      694.4     1173.8     1711.3       0.01      16.37      16.39      16.42
 CFC-114          2011.0        0.0    10736.1     1056.5      16.35        0.0        0.0        0.0        0.0     2755.3     5461.7    10701.2    16246.4      221.4      634.6     1051.9     1502.9       0.02      16.30      16.35      16.39
 CFC-114          2012.0        0.0     9679.5      945.7      16.30        0.0        0.0        0.0        0.0     2669.7     4642.2     9617.9    15087.9      191.8      575.7      943.1     1329.0       0.04      16.23      16.30      16.37
 CFC-114          2013.0        0.0     8733.8      847.3      16.25        0.0        0.0        0.0        0.0     2585.6     3938.3     8649.3    14041.3      169.2      517.7      846.3     1182.0       0.05      16.15      16.25      16.34
 CFC-114          2014.0        0.0     7886.5      759.7      16.19        0.0        0.0        0.0        0.0     2501.1     3328.1     7775.9    13085.9      151.9      459.2      759.9     1057.1       0.06      16.07      16.19      16.30
 CFC-114          2015.0        0.0     7126.9      681.7      16.13        0.0        0.0        0.0        0.0     2415.4     2813.7     6992.9    12217.5      138.9      403.3      683.4      949.1       0.07      15.99      16.13      16.26
 CFC-114          2016.0        0.0     6445.2      612.2      16.07        0.0        0.0        0.0        0.0     2328.4     2371.9     6286.4    11423.6      128.9      350.0      614.9      858.3       0.08      15.91      16.07      16.22
 CFC-114          2017.0        0.0     5833.0      550.2      16.01        0.0        0.0        0.0        0.0     2240.3     1997.1     5651.6    10690.5      121.0      302.2      553.7      778.7       0.09      15.83      16.01      16.18
 CFC-114          2018.0        0.0     5282.7      494.9      15.94        0.0        0.0        0.0        0.0     2151.7     1680.9     5081.3    10018.5      114.6      258.5      498.9      709.7       0.10      15.74      15.95      16.13
 CFC-114          2019.0        0.0     4787.8      445.5      15.88        0.0        0.0        0.0        0.0     2063.1     1415.4     4569.9     9393.8      109.2      219.6      449.7      649.6       0.11      15.66      15.88      16.08
 CFC-114          2020.0        0.0     4342.3      401.3      15.81        0.0        0.0        0.0        0.0     1974.9     1188.8     4109.5     8814.6      104.4      186.2      405.4      596.2       0.12      15.57      15.81      16.04
 CFC-114          2021.0        0.0     3940.9      361.8      15.74        0.0        0.0        0.0        0.0     1887.9      997.5     3694.5     8267.5      100.0      157.4      365.5      548.6       0.13      15.48      15.74      15.99
 CFC-114          2022.0        0.0     3579.1      326.4      15.67        0.0        0.0        0.0        0.0     1802.3      837.5     3322.2     7761.6       95.8      132.7      329.5      506.2       0.14      15.39      15.67      15.94
 CFC-114          2023.0        0.0     3252.7      294.7      15.60        0.0        0.0        0.0        0.0     1718.6      703.5     2986.8     7295.9       91.9      111.9      296.9      468.3       0.15      15.30      15.60      15.88
 CFC-114          2024.0        0.0     2958.0      266.2      15.53        0.0        0.0        0.0        0.0     1637.1      591.1     2686.2     6858.7       88.0       94.2      267.5      434.0       0.16      15.21      15.53      15.83
 CFC-114          2025.0        0.0     2691.8      240.7      15.45        0.0        0.0        0.0        0.0     1558.1      496.1     2415.7     6443.5       84.2       79.2      241.0      403.2       0.17      15.12      15.46      15.78
 CFC-114          2026.0        0.0     2451.1      217.7      15.38        0.0        0.0        0.0        0.0     1481.6      416.1     2172.7     6054.8       80.5       66.5      216.9      375.4       0.18      15.03      15.38      15.72
 CFC-114          2027.0        0.0     2233.4      197.1      15.31        0.0        0.0        0.0        0.0     1408.0      349.3     1953.5     5695.0       76.8       55.8      195.3      349.9       0.19      14.94      15.31      15.67
 CFC-114          2028.0        0.0     2036.2      178.6      15.23        0.0        0.0        0.0        0.0     1337.1      293.2     1756.4     5360.0       73.3       47.0      175.8      326.5       0.19      14.85      15.24      15.61
 CFC-114          2029.0        0.0     1857.7      161.9      15.16        0.0        0.0        0.0        0.0     1269.2      245.5     1578.9     5041.5       69.8       39.4      158.2      305.0       0.20      14.76      15.16      15.56
 CFC-114          2030.0        0.0     1695.8      146.8      15.09        0.0        0.0        0.0        0.0     1204.2      205.9     1419.8     4743.1       66.4       33.1      142.4      285.2       0.21      14.67      15.09      15.50
 CFC-114          2031.0        0.0     1549.0      133.3      15.01        0.0        0.0        0.0        0.0     1142.1      172.7     1276.8     4467.3       63.1       27.8      128.1      267.0       0.22      14.57      15.01      15.44
 CFC-114          2032.0        0.0     1415.7      121.0      14.94        0.0        0.0        0.0        0.0     1082.8      144.7     1148.0     4204.1       60.0       23.3      115.2      250.1       0.23      14.48      14.94      15.39
 CFC-114          2033.0        0.0     1294.6      110.0      14.86        0.0        0.0        0.0        0.0     1026.4      121.3     1031.9     3957.6       56.9       19.6      103.6      234.6       0.24      14.39      14.86      15.33
 CFC-114          2034.0        0.0     1184.6      100.0      14.79        0.0        0.0        0.0        0.0      972.7      101.7      927.6     3725.8       54.0       16.4       93.2      220.1       0.25      14.30      14.79      15.27
 CFC-114          2035.0        0.0     1084.6       91.0      14.71        0.0        0.0        0.0        0.0      921.7       85.1      833.9     3507.5       51.2       13.8       83.9      206.6       0.26      14.21      14.71      15.22
 CFC-114          2036.0        0.0      993.6       82.9      14.64        0.0        0.0        0.0        0.0      873.3       71.3      749.6     3305.0       48.5       11.5       75.5      194.1       0.26      14.12      14.64      15.16
 CFC-114          2037.0        0.0      910.7       75.5      14.57        0.0        0.0        0.0        0.0      827.3       59.7      673.9     3114.2       45.9        9.7       67.9      182.2       0.27      14.03      14.57      15.10
 CFC-114          2038.0        0.0      835.2       68.8      14.49        0.0        0.0        0.0        0.0      783.7       50.0      605.6     2932.6       43.4        8.1       61.0      171.3       0.28      13.94      14.49      15.05
 CFC-114          2039.0        0.0      766.4       62.8      14.42        0.0        0.0        0.0        0.0      742.5       41.8      544.4     2764.3       41.0        6.8       54.9      161.0       0.29      13.86      14.42      14.99
 CFC-114          2040.0        0.0      703.7       57.3      14.34        0.0        0.0        0.0        0.0      703.4       35.0      489.4     2604.5       38.8        5.7       49.4      151.5       0.30      13.77      14.34      14.93
 CFC-114          2041.0        0.0      646.4       52.3      14.27        0.0        0.0        0.0        0.0      666.4       29.3      440.1     2453.3       36.7        4.8       44.4      142.4       0.30      13.68      14.27      14.87
 CFC-114          2042.0        0.0      594.1       47.8      14.20        0.0        0.0        0.0        0.0      631.5       24.5      395.6     2312.4       34.7        4.0       39.9      133.9       0.31      13.59      14.20      14.81
 CFC-114          2043.0        0.0      546.4       43.7      14.12        0.0        0.0        0.0        0.0      598.4       20.6      355.7     2179.9       32.8        3.3       35.9      126.1       0.32      13.50      14.12      14.76
 CFC-114          2044.0        0.0      502.7       39.9      14.05        0.0        0.0        0.0        0.0      567.1       17.2      319.8     2053.2       30.9        2.8       32.3      118.7       0.33      13.42      14.05      14.70
 CFC-114          2045.0        0.0      462.8       36.5      13.98        0.0        0.0        0.0        0.0      537.6       14.4      287.6     1935.9       29.2        2.3       29.0      111.8       0.33      13.33      13.98      14.64
 CFC-114          2046.0        0.0      426.2       33.5      13.91        0.0        0.0        0.0        0.0      509.6       12.1      258.6     1823.4       27.6        2.0       26.1      105.2       0.34      13.25      13.90      14.59
 CFC-114          2047.0        0.0      392.7       30.6      13.84        0.0        0.0        0.0        0.0      483.3       10.1      232.5     1718.5       26.1        1.6       23.4       99.0       0.35      13.16      13.83      14.53
 CFC-114          2048.0        0.0      362.1       28.1      13.76        0.0        0.0        0.0        0.0      458.3        8.5      209.1     1620.3       24.6        1.4       21.1       93.3       0.36      13.08      13.76      14.47
 CFC-114          2049.0        0.0      334.0       25.8      13.69        0.0        0.0        0.0        0.0      434.8        7.1      188.0     1526.9       23.3        1.2       18.9       87.8       0.36      12.99      13.69      14.41
 CFC-114          2050.0        0.0      308.2       23.6      13.62        0.0        0.0        0.0        0.0      412.5        5.9      169.1     1438.7       22.0        1.0       17.0       82.7       0.37      12.91      13.62      14.36
 CFC-114          2051.0        0.0      284.6       21.7      13.55        0.0        0.0        0.0        0.0      391.5        5.0      152.0     1356.1       20.8        0.8       15.3       77.9       0.38      12.82      13.55      14.30
 CFC-114          2052.0        0.0      262.9       19.9      13.48        0.0        0.0        0.0        0.0      371.6        4.2      136.7     1278.1       19.6        0.7       13.8       73.3       0.38      12.74      13.48      14.24
 CFC-114          2053.0        0.0      243.0       18.3      13.41        0.0        0.0        0.0        0.0      352.9        3.5      122.9     1204.8       18.5        0.6       12.4       69.2       0.39      12.66      13.40      14.19
 CFC-114          2054.0        0.0      224.7       16.8      13.34        0.0        0.0        0.0        0.0      335.2        2.9      110.5     1135.2       17.5        0.5       11.1       65.2       0.40      12.58      13.33      14.13
 CFC-114          2055.0        0.0      207.9       15.5      13.27        0.0        0.0        0.0        0.0      318.4        2.4       99.4     1070.0       16.5        0.4       10.0       61.4       0.40      12.50      13.27      14.07
 CFC-114          2056.0        0.0      192.4       14.2      13.20        0.0        0.0        0.0        0.0      302.6        2.0       89.3     1009.1       15.6        0.3        9.0       57.9       0.41      12.42      13.20      14.02
 CFC-114          2057.0        0.0      178.1       13.1      13.13        0.0        0.0        0.0        0.0      287.6        1.7       80.4      951.3       14.8        0.3        8.1       54.5       0.41      12.34      13.13      13.96
 CFC-114          2058.0        0.0      165.0       12.1      13.06        0.0        0.0        0.0        0.0      273.5        1.4       72.3      896.1       14.0        0.2        7.3       51.4       0.42      12.26      13.06      13.91
 CFC-114          2059.0        0.0      152.9       11.1      13.00        0.0        0.0        0.0        0.0      260.1        1.2       65.0      845.1       13.2        0.2        6.5       48.5       0.43      12.18      12.99      13.85
 CFC-114          2060.0        0.0      141.8       10.3      12.93        0.0        0.0        0.0        0.0      247.5        1.0       58.4      796.6       12.5        0.2        5.9       45.7       0.43      12.10      12.92      13.80
 CFC-114          2061.0        0.0      131.6        9.5      12.86        0.0        0.0        0.0        0.0      235.5        0.8       52.5      750.6       11.8        0.1        5.3       43.0       0.44      12.02      12.85      13.74
 CFC-114          2062.0        0.0      122.1        8.7      12.79        0.0        0.0        0.0        0.0      224.2        0.7       47.2      707.5       11.2        0.1        4.8       40.6       0.44      11.94      12.79      13.68
 CFC-114          2063.0        0.0      113.4        8.1      12.73        0.0        0.0        0.0        0.0      213.5        0.6       42.5      666.7       10.6        0.1        4.3       38.2       0.45      11.86      12.72      13.63
 CFC-114          2064.0        0.0      105.3        7.4      12.66        0.0        0.0        0.0        0.0      203.4        0.5       38.2      628.7       10.0        0.1        3.8       36.0       0.46      11.79      12.65      13.57
 CFC-114          2065.0        0.0       97.8        6.9      12.59        0.0        0.0        0.0        0.0      193.8        0.4       34.3      592.2        9.5        0.1        3.5       34.0       0.46      11.71      12.59      13.52
 CFC-114          2066.0        0.0       91.0        6.4      12.53        0.0        0.0        0.0        0.0      184.8        0.3       30.9      558.2        9.0        0.1        3.1       32.0       0.47      11.63      12.52      13.47
 CFC-114          2067.0        0.0       84.6        5.9      12.46        0.0        0.0        0.0        0.0      176.2        0.3       27.8      526.4        8.5        0.0        2.8       30.2       0.47      11.56      12.45      13.41
 CFC-114          2068.0        0.0       78.7        5.4      12.40        0.0        0.0        0.0        0.0      168.0        0.2       25.0      496.1        8.1        0.0        2.5       28.4       0.48      11.48      12.39      13.36
 CFC-114          2069.0        0.0       73.3        5.0      12.33        0.0        0.0        0.0        0.0      160.3        0.2       22.4      467.4        7.6        0.0        2.3       26.8       0.48      11.41      12.32      13.30
 CFC-114          2070.0        0.0       68.2        4.7      12.27        0.0        0.0        0.0        0.0      153.0        0.2       20.2      440.6        7.2        0.0        2.0       25.3       0.49      11.33      12.26      13.25
 CFC-114          2071.0        0.0       63.6        4.3      12.20        0.0        0.0        0.0        0.0      146.1        0.1       18.1      415.4        6.9        0.0        1.8       23.8       0.49      11.26      12.19      13.20
 CFC-114          2072.0        0.0       59.3        4.0      12.14        0.0        0.0        0.0        0.0      139.5        0.1       16.3      391.7        6.5        0.0        1.6       22.4       0.50      11.19      12.13      13.15
 CFC-114          2073.0        0.0       55.2        3.7      12.07        0.0        0.0        0.0        0.0      133.3        0.1       14.7      369.2        6.2        0.0        1.5       21.2       0.50      11.11      12.07      13.09
 CFC-114          2074.0        0.0       51.5        3.4      12.01        0.0        0.0        0.0        0.0      127.4        0.1       13.2      347.9        5.9        0.0        1.3       20.0       0.51      11.04      12.00      13.04
 CFC-114          2075.0        0.0       48.1        3.2      11.95        0.0        0.0        0.0        0.0      121.8        0.1       11.9      328.0        5.6        0.0        1.2       18.8       0.51      10.97      11.94      12.99
 CFC-114          2076.0        0.0       44.9        3.0      11.89        0.0        0.0        0.0        0.0      116.4        0.1       10.7      309.2        5.3        0.0        1.1       17.7       0.52      10.90      11.88      12.93
 CFC-114          2077.0        0.0       41.9        2.8      11.82        0.0        0.0        0.0        0.0      111.4        0.0        9.6      291.6        5.0        0.0        1.0       16.7       0.52      10.83      11.81      12.88
 CFC-114          2078.0        0.0       39.2        2.6      11.76        0.0        0.0        0.0        0.0      106.6        0.0        8.6      274.7        4.8        0.0        0.9       15.8       0.53      10.76      11.75      12.83
 CFC-114          2079.0        0.0       36.6        2.4      11.70        0.0        0.0        0.0        0.0      102.0        0.0        7.8      259.1        4.5        0.0        0.8       14.8       0.53      10.69      11.69      12.78
 CFC-114          2080.0        0.0       34.2        2.2      11.64        0.0        0.0        0.0        0.0       97.7        0.0        7.0      244.3        4.3        0.0        0.7       14.0       0.54      10.62      11.63      12.73
 CFC-114          2081.0        0.0       32.0        2.1      11.58        0.0        0.0        0.0        0.0       93.5        0.0        6.3      230.2        4.1        0.0        0.6       13.2       0.54      10.55      11.57      12.68
 CFC-114          2082.0        0.0       29.9        1.9      11.52        0.0        0.0        0.0        0.0       89.6        0.0        5.6      217.1        3.9        0.0        0.6       12.4       0.55      10.48      11.50      12.62
 CFC-114          2083.0        0.0       28.0        1.8      11.46        0.0        0.0        0.0        0.0       85.9        0.0        5.1      204.8        3.7        0.0        0.5       11.7       0.55      10.41      11.44      12.57
 CFC-114          2084.0        0.0       26.2        1.7      11.40        0.0        0.0        0.0        0.0       82.3        0.0        4.6      192.9        3.5        0.0        0.5       11.0       0.56      10.35      11.38      12.52
 CFC-114          2085.0        0.0       24.6        1.5      11.34        0.0        0.0        0.0        0.0       78.9        0.0        4.1      181.9        3.4        0.0        0.4       10.4       0.56      10.28      11.32      12.47
 CFC-114          2086.0        0.0       23.0        1.4      11.28        0.0        0.0        0.0        0.0       75.7        0.0        3.7      171.5        3.2        0.0        0.4        9.8       0.56      10.21      11.26      12.42
 CFC-114          2087.0        0.0       21.6        1.3      11.22        0.0        0.0        0.0        0.0       72.7        0.0        3.3      161.8        3.1        0.0        0.3        9.2       0.57      10.15      11.20      12.37
 CFC-114          2088.0        0.0       20.3        1.3      11.16        0.0        0.0        0.0        0.0       69.7        0.0        3.0      152.5        2.9        0.0        0.3        8.7       0.57      10.08      11.15      12.32
 CFC-114          2089.0        0.0       19.0        1.2      11.10        0.0        0.0        0.0        0.0       66.9        0.0        2.7      143.8        2.8        0.0        0.3        8.2       0.58      10.01      11.09      12.27
 CFC-114          2090.0        0.0       17.8        1.1      11.04        0.0        0.0        0.0        0.0       64.3        0.0        2.4      135.6        2.7        0.0        0.2        7.7       0.58       9.95      11.03      12.22
 CFC-114          2091.0        0.0       16.7        1.0      10.98        0.0        0.0        0.0        0.0       61.7        0.0        2.2      127.8        2.5        0.0        0.2        7.3       0.58       9.88      10.97      12.17
 CFC-114          2092.0        0.0       15.7        1.0      10.93        0.0        0.0        0.0        0.0       59.3        0.0        1.9      120.4        2.4        0.0        0.2        6.9       0.59       9.82      10.91      12.12
 CFC-114          2093.0        0.0       14.8        0.9      10.87        0.0        0.0        0.0        0.0       57.0        0.0        1.7      113.5        2.3        0.0        0.2        6.5       0.59       9.76      10.86      12.07
 CFC-114          2094.0        0.0       13.9        0.8      10.81        0.0        0.0        0.0        0.0       54.8        0.0        1.6      107.0        2.2        0.0        0.2        6.1       0.60       9.69      10.80      12.03
 CFC-114          2095.0        0.0       13.0        0.8      10.76        0.0        0.0        0.0        0.0       52.7        0.0        1.4      100.9        2.1        0.0        0.1        5.8       0.60       9.63      10.74      11.98
 CFC-114          2096.0        0.0       12.3        0.7      10.70        0.0        0.0        0.0        0.0       50.7        0.0        1.3       95.1        2.0        0.0        0.1        5.4       0.60       9.57      10.68      11.93
 CFC-114          2097.0        0.0       11.5        0.7      10.64        0.0        0.0        0.0        0.0       48.8        0.0        1.1       89.7        1.9        0.0        0.1        5.1       0.61       9.50      10.63      11.88
 CFC-114          2098.0        0.0       10.9        0.6      10.59        0.0        0.0        0.0        0.0       46.9        0.0        1.0       84.6        1.8        0.0        0.1        4.8       0.61       9.44      10.57      11.83
 CFC-114          2099.0        0.0       10.2        0.6      10.53        0.0        0.0        0.0        0.0       45.2        0.0        0.9       79.7        1.8        0.0        0.1        4.6       0.61       9.38      10.52      11.78
 CFC-114          2100.0        0.0        9.6        0.6      10.48        0.0        0.0        0.0        0.0       43.5        0.0        0.8       75.2        1.7        0.0        0.1        4.3       0.62       9.32      10.46      11.74
 CFC-114          2101.0        0.0        9.1        0.5      10.42        0.0        0.0        0.0        0.0       41.9        0.0        0.7       71.0        1.6        0.0        0.1        4.1       0.62       9.26      10.41      11.69
 CFC-114          2102.0        0.0        8.5        0.5      10.37        0.0        0.0        0.0        0.0       40.4        0.0        0.7       66.9        1.5        0.0        0.1        3.8       0.62       9.20      10.35      11.64
 CFC-114          2103.0        0.0        8.1        0.5      10.31        0.0        0.0        0.0        0.0       38.9        0.0        0.6       63.0        1.5        0.0        0.1        3.6       0.63       9.14      10.30      11.59
 CFC-114          2104.0        0.0        7.6        0.4      10.26        0.0        0.0        0.0        0.0       37.5        0.0        0.5       59.5        1.4        0.0        0.1        3.4       0.63       9.08      10.24      11.55
 CFC-114          2105.0        0.0        7.2        0.4      10.21        0.0        0.0        0.0        0.0       36.1        0.0        0.5       56.1        1.3        0.0        0.0        3.2       0.63       9.02      10.19      11.50
 CFC-114          2106.0        0.0        6.8        0.4      10.15        0.0        0.0        0.0        0.0       34.8        0.0        0.4       52.9        1.3        0.0        0.0        3.0       0.64       8.96      10.13      11.45
 CFC-114          2107.0        0.0        6.4        0.4      10.10        0.0        0.0        0.0        0.0       33.6        0.0        0.4       49.8        1.2        0.0        0.0        2.8       0.64       8.90      10.08      11.41
 CFC-114          2108.0        0.0        6.0        0.3      10.05        0.0        0.0        0.0        0.0       32.4        0.0        0.4       47.0        1.2        0.0        0.0        2.7       0.64       8.85      10.03      11.36
 CFC-114          2109.0        0.0        5.7        0.3       9.99        0.0        0.0        0.0        0.0       31.3        0.0        0.3       44.3        1.1        0.0        0.0        2.5       0.65       8.79       9.97      11.32
 CFC-114          2110.0        0.0        5.4        0.3       9.94        0.0        0.0        0.0        0.0       30.2        0.0        0.3       41.8        1.1        0.0        0.0        2.4       0.65       8.73       9.92      11.27
 CFC-114          2111.0        0.0        5.1        0.3       9.89        0.0        0.0        0.0        0.0       29.1        0.0        0.3       39.4        1.0        0.0        0.0        2.2       0.65       8.67       9.87      11.23
 CFC-114          2112.0        0.0        4.8        0.3       9.84        0.0        0.0        0.0        0.0       28.1        0.0        0.2       37.2        1.0        0.0        0.0        2.1       0.65       8.62       9.82      11.18
 CFC-114          2113.0        0.0        4.5        0.2       9.79        0.0        0.0        0.0        0.0       27.2        0.0        0.2       35.0        1.0        0.0        0.0        2.0       0.66       8.56       9.77      11.14
 CFC-114          2114.0        0.0        4.3        0.2       9.74        0.0        0.0        0.0        0.0       26.2        0.0        0.2       33.1        0.9        0.0        0.0        1.9       0.66       8.51       9.71      11.09
 CFC-114          2115.0        0.0        4.1        0.2       9.68        0.0        0.0        0.0        0.0       25.4        0.0        0.2       31.2        0.9        0.0        0.0        1.8       0.66       8.45       9.66      11.05
 CFC-114          2116.0        0.0        3.8        0.2       9.63        0.0        0.0        0.0        0.0       24.5        0.0        0.2       29.4        0.9        0.0        0.0        1.7       0.66       8.40       9.61      11.00
 CFC-114          2117.0        0.0        3.6        0.2       9.58        0.0        0.0        0.0        0.0       23.7        0.0        0.1       27.7        0.8        0.0        0.0        1.6       0.67       8.34       9.56      10.96
 CFC-114          2118.0        0.0        3.4        0.2       9.53        0.0        0.0        0.0        0.0       22.9        0.0        0.1       26.1        0.8        0.0        0.0        1.5       0.67       8.29       9.51      10.91
 CFC-114          2119.0        0.0        3.3        0.2       9.48        0.0        0.0        0.0        0.0       22.1        0.0        0.1       24.7        0.8        0.0        0.0        1.4       0.67       8.23       9.46      10.87
 CFC-114          2120.0        0.0        3.1        0.2       9.43        0.0        0.0        0.0        0.0       21.4        0.0        0.1       23.2        0.7        0.0        0.0        1.3       0.67       8.18       9.41      10.82
 
 Species            Year  Prod_mean  Bank_mean  Emis_mean   Mix_mean  Prod_stdv  Prod_2.5p   Prod_50p Prod_97.5p  Bank_stdv  Bank_2.5p   Bank_50p Bank_97.5p  Emis_stdv  Emis_2.5p   Emis_50p Emis_97.5p   Mix_stdv   Mix_2.5p    Mix_50p  Mix_97.5p
 CFC-115          1950.0        0.0        0.0        0.0       0.00        0.0        0.0        0.0        0.0        0.0        0.0        0.0        0.0        0.0        0.0        0.0        0.0       0.00       0.00       0.00       0.00
 CFC-115          1951.0        0.0        0.0        0.0       0.00        0.0        0.0        0.0        0.0        0.0        0.0        0.0        0.0        0.0        0.0        0.0        0.0       0.00       0.00       0.00       0.00
 CFC-115          1952.0        0.0        0.0        0.0       0.00        0.0        0.0        0.0        0.0        0.0        0.0        0.0        0.0        0.0        0.0        0.0        0.0       0.00       0.00       0.00       0.00
 CFC-115          1953.0        0.0        0.0        0.0       0.00        0.0        0.0        0.0        0.0        0.0        0.0        0.0        0.0        0.0        0.0        0.0        0.0       0.00       0.00       0.00       0.00
 CFC-115          1954.0        0.0        0.0        0.0       0.00        0.0        0.0        0.0        0.0        0.0        0.0        0.0        0.0        0.0        0.0        0.0        0.0       0.00       0.00       0.00       0.00
 CFC-115          1955.0        0.0        0.0        0.0       0.00        0.0        0.0        0.0        0.0        0.0        0.0        0.0        0.0        0.0        0.0        0.0        0.0       0.00       0.00       0.00       0.00
 CFC-115          1956.0        0.0        0.0        0.0       0.00        0.0        0.0        0.0        0.0        0.0        0.0        0.0        0.0        0.0        0.0        0.0        0.0       0.00       0.00       0.00       0.00
 CFC-115          1957.0        0.0        0.0        0.0       0.00        0.0        0.0        0.0        0.0        0.0        0.0        0.0        0.0        0.0        0.0        0.0        0.0       0.00       0.00       0.00       0.00
 CFC-115          1958.0        0.0        0.0        0.0       0.00        0.0        0.0        0.0        0.0        0.0        0.0        0.0        0.0        0.0        0.0        0.0        0.0       0.00       0.00       0.00       0.00
 CFC-115          1959.0        0.0        0.0        0.0       0.00        0.0        0.0        0.0        0.0        0.0        0.0        0.0        0.0        0.0        0.0        0.0        0.0       0.00       0.00       0.00       0.00
 CFC-115          1960.0        0.0        0.0        0.0       0.00        0.0        0.0        0.0        0.0        0.0        0.0        0.0        0.0        0.0        0.0        0.0        0.0       0.00       0.00       0.00       0.00
 CFC-115          1961.0        0.0        0.0        0.0       0.00        0.0        0.0        0.0        0.0        0.0        0.0        0.0        0.0        0.0        0.0        0.0        0.0       0.00       0.00       0.00       0.00
 CFC-115          1962.0        0.0        0.0        0.0       0.00        0.0        0.0        0.0        0.0        0.0        0.0        0.0        0.0        0.0        0.0        0.0        0.0       0.00       0.00       0.00       0.00
 CFC-115          1963.0        0.0        0.0        0.0       0.00        0.0        0.0        0.0        0.0        0.0        0.0        0.0        0.0        0.0        0.0        0.0        0.0       0.00       0.00       0.00       0.00
 CFC-115          1964.0      900.0     2315.0      225.4       0.00       45.0      811.8      900.0      988.2    13624.5   -24166.6     2275.1    29073.0        6.8      212.7      225.2      239.2       0.00       0.00       0.00       0.00
 CFC-115          1965.0     1100.0     2989.6      444.5       0.01       55.0      992.2     1100.0     1207.8    13582.5   -23406.1     2950.6    29667.8       13.4      419.5      444.1      471.9       0.00       0.01       0.01       0.01
 CFC-115          1966.0     1200.0     3645.1      634.6       0.03       60.0     1082.4     1200.0     1317.6    13528.6   -22644.6     3603.4    30222.2       19.1      598.8      634.0      673.6       0.00       0.03       0.03       0.03
 CFC-115          1967.0     1400.0     4210.5      827.2       0.05       70.0     1262.8     1400.0     1537.2    13467.7   -21965.0     4166.3    30672.3       24.9      780.6      826.5      878.1       0.00       0.05       0.05       0.05
 CFC-115          1968.0     1700.0     4783.3     1047.5       0.08       85.0     1533.5     1700.0     1866.6    13395.3   -21252.7     4736.7    31101.9       31.5      988.4     1046.6     1112.0       0.00       0.08       0.08       0.08
 CFC-115          1969.0     2000.0     5435.8     1288.3       0.12       99.9     1804.1     2000.0     2195.9    13306.7   -20433.6     5387.1    31578.7       38.7     1215.7     1287.1     1367.6       0.00       0.12       0.12       0.12
 CFC-115          1970.0     2300.0     6147.4     1544.6       0.17      114.9     2074.7     2300.0     2525.3    13201.8   -19513.7     6099.6    32083.7       46.5     1457.4     1543.2     1639.6       0.00       0.17       0.17       0.17
 CFC-115          1971.0     2600.0     6902.9     1812.8       0.24      129.9     2345.3     2600.0     2854.7    13080.1   -18523.4     6855.1    32601.6       54.5     1710.5     1811.1     1924.3       0.00       0.24       0.24       0.24
 CFC-115          1972.0     3100.0     7690.1     2139.5       0.31      154.9     2796.3     3100.0     3403.7    12941.6   -17468.1     7643.7    33117.1       64.4     2018.8     2137.6     2271.1       0.00       0.31       0.31       0.31
 CFC-115          1973.0     3600.0     8650.6     2511.2       0.39      179.9     3247.3     3600.0     3952.7    12776.9   -16182.8     8600.7    33748.9       75.6     2369.5     2508.9     2665.7       0.00       0.39       0.39       0.39
 CFC-115          1974.0     4200.0     9739.4     2940.8       0.49      209.9     3788.5     4200.0     4611.5    12585.3   -14718.8     9689.0    34464.6       88.5     2774.8     2938.2     3121.7       0.00       0.49       0.49       0.49
 CFC-115          1975.0     4800.0    10998.6     3415.0       0.60      239.9     4329.7     4800.0     5270.3    12361.7   -13024.9    10948.1    35290.9      102.8     3222.2     3411.9     3625.2       0.00       0.60       0.60       0.60
 CFC-115          1976.0     5600.0    12383.6     3972.1       0.73      279.9     5051.4     5600.0     6148.7    12105.5   -11143.6    12332.9    36180.3      119.6     3747.9     3968.6     4216.6       0.00       0.73       0.73       0.73
 CFC-115          1977.0     6500.0    14011.5     2346.5       0.89      324.8     5863.2     6500.0     7136.8    11807.1    -8934.5    13963.7    37218.4       70.9     2213.6     2344.5     2491.9       0.00       0.89       0.89       0.89
 CFC-115          1978.0     7600.0    18165.0     2883.5       0.98      379.8     6855.4     7600.0     8344.6    11496.0    -4184.6    18119.5    40768.4       87.1     2720.3     2881.0     3062.0       0.00       0.98       0.98       0.98
 CFC-115          1979.0     8900.0    22881.5     5260.1       1.09      444.8     8028.1     8900.0     9772.0    11131.8     1249.0    22838.4    44786.9      158.4     4963.2     5255.5     5584.4       0.00       1.09       1.09       1.09
 CFC-115          1980.0     9342.0    26521.3     6015.1       1.30      466.9     8426.8     9342.0    10257.3    10677.4     5756.6    26473.1    47556.9      181.2     5675.7     6009.8     6386.0       0.00       1.30       1.30       1.30
 CFC-115          1981.0     9955.0    29848.2     6835.7       1.53      497.5     8979.7     9955.0    10930.3    10194.1    10032.8    29803.6    49927.9      205.9     6449.7     6829.7     7257.1       0.00       1.53       1.53       1.53
 CFC-115          1982.0    10366.0    32967.5     7653.7       1.80      518.0     9350.4    10366.0    11381.6     9674.0    14171.1    32924.2    52048.2      230.6     7221.3     7646.9     8125.6       0.00       1.80       1.80       1.80
 CFC-115          1983.0    11629.0    35679.8     8352.5       2.09      581.1    10489.7    11629.0    12768.4     9125.7    17942.2    35637.4    53688.3      251.7     7880.5     8345.2     8867.9       0.00       2.09       2.09       2.09
 CFC-115          1984.0    11221.0    38956.3     8929.0       2.42      560.8    10121.7    11221.0    12320.4     8517.5    22418.6    38920.1    55771.8      269.2     8424.2     8921.2     9480.2       0.00       2.42       2.42       2.42
 CFC-115          1985.0    10036.0    41248.3     9331.4       2.76      501.5     9052.8    10036.0    11019.3     7919.2    25886.5    41203.4    56891.8      281.5     8803.5     9323.4     9908.1       0.00       2.76       2.76       2.76
 CFC-115          1986.0    11234.0    41953.0     9726.0       3.12      561.4    10133.4    11234.0    12334.7     7363.5    27659.0    41911.5    56502.3      293.5     9175.6     9717.6    10327.5       0.00       3.12       3.12       3.12
 CFC-115          1987.0    12343.6    43461.0    10044.2       3.50      616.9    11134.3    12343.6    13553.0     6758.1    30343.0    43420.0    56824.5      303.3     9475.4    10035.5    10665.9       0.00       3.50       3.50       3.50
 CFC-115          1988.0    13453.2    45760.3    10375.7       3.89      672.3    12135.2    13453.2    14771.3     6111.2    33901.9    45723.2    57863.4      313.6     9788.0    10366.8    11018.5       0.00       3.89       3.89       3.89
 CFC-115          1989.0    14562.8    48837.8    10759.5       4.29      727.8    13136.1    14562.8    15989.6     5428.4    38313.5    48802.7    59597.2      325.4    10149.5    10750.3    11426.5       0.00       4.29       4.29       4.29
 CFC-115          1990.0    12669.0    52641.0    11013.1       4.70      633.1    11427.8    12669.0    13910.2     4718.9    43493.5    52596.9    62017.7      333.3    10387.8    11003.6    11696.4       0.00       4.70       4.70       4.70
 CFC-115          1991.0    11440.0    54296.9    11281.3       5.13      571.7    10319.2    11440.0    12560.8     4093.8    46364.4    54256.0    62437.7      341.7    10640.0    11271.8    11981.4       0.00       5.13       5.13       5.13
 CFC-115          1992.0    11654.0    54455.6    11278.6       5.56      582.4    10512.3    11654.0    12795.8     3530.9    47616.8    54421.0    61488.5      342.1    10636.4    11269.1    11979.4       0.00       5.56       5.56       5.56
 CFC-115          1993.0    10659.0    54831.0    11019.6       5.99      532.7     9614.7    10659.0    11703.3     3005.4    49025.8    54800.1    60805.5      334.8    10390.7    11010.4    11705.4       0.00       5.99       5.99       5.99
 CFC-115          1994.0     8981.1    54470.4    10067.0       6.41      448.8     8101.2     8981.1     9861.0     2571.1    49503.7    54442.4    59585.1      307.1     9490.4    10058.4    10695.0       0.00       6.41       6.41       6.41
 CFC-115          1995.0     1901.2    53384.5     8148.1       6.80       95.0     1714.9     1901.2     2087.5     2259.5    49008.9    53359.1    57870.9      251.0     7676.5     8140.9     8661.5       0.00       6.80       6.80       6.80
 CFC-115          1996.0      829.0    47137.6     6703.9       7.11       41.4      747.8      829.0      910.2     2089.7    43082.4    47120.0    51270.8      209.5     6310.0     6697.9     7132.0       0.00       7.11       7.11       7.11
 CFC-115          1997.0      659.0    41262.7     5591.2       7.36       32.9      594.4      659.0      723.6     1965.8    37434.1    41250.9    45137.1      178.2     5255.6     5586.3     5955.1       0.00       7.36       7.36       7.36
 CFC-115          1998.0      604.0    36330.5     4878.4       7.56       30.2      544.8      604.0      663.2     1871.0    32676.1    36323.9    40014.3      158.8     4579.2     4874.0     5202.3       0.00       7.56       7.56       7.56
 CFC-115          1999.0      613.0    32056.1     4429.9       7.74       30.6      552.9      613.0      673.1     1796.0    28545.7    32051.6    35585.1      147.0     4152.8     4426.0     4729.5       0.00       7.74       7.74       7.74
 CFC-115          2000.0      475.0    28239.1     3533.9       7.90       23.7      428.5      475.0      521.5     1735.8    24847.0    28236.8    31645.6      123.7     3300.1     3530.8     3785.8       0.00       7.90       7.90       7.90
 CFC-115          2001.0      449.0    25180.2      874.6       8.02       22.4      405.0      449.0      493.0     1692.0    21871.7    25181.1    28494.8       69.4      740.7      873.8     1012.8       0.00       8.02       8.02       8.02
 CFC-115          2002.0      230.0    24754.6     1777.2       8.04       11.5      207.5      230.0      252.5     1669.3    21485.3    24755.3    28024.0       83.7     1617.5     1775.7     1945.8       0.00       8.04       8.04       8.04
 CFC-115          2003.0      325.7    23207.4     3882.8       8.10       16.3      293.8      325.7      357.6     1645.4    19982.0    23209.8    26432.0      133.6     3630.7     3879.3     4154.7       0.00       8.10       8.10       8.10
 CFC-115          2004.0      318.8    19650.4     2743.0       8.23       15.9      287.6      318.8      350.0     1618.8    16479.7    19650.3    22822.7      105.7     2542.5     2740.6     2957.3       0.00       8.23       8.23       8.23
 CFC-115          2005.0      219.1    17226.1      723.4       8.33       10.9      197.6      219.1      240.6     1603.8    14090.0    17224.8    20372.4       70.2      587.8      722.8      862.6       0.00       8.33       8.33       8.33
 CFC-115          2006.0      170.5    16721.8      796.3       8.34        8.5      153.8      170.5      187.2     1595.8    13601.6    16720.7    19850.6       71.0      659.4      795.7      937.2       0.00       8.34       8.34       8.34
 CFC-115          2007.0      199.7    16096.0      395.7       8.36       10.0      180.1      199.7      219.3     1590.9    12979.3    16095.8    19215.5       68.0      263.6      395.4      530.3       0.00       8.36       8.36       8.36
 CFC-115          2008.0        0.0    15900.0      438.3       8.36        0.0        0.0        0.0        0.0     1589.2    12784.5    15900.0    19015.5       68.2      305.8      437.9      573.4       0.00       8.36       8.36       8.36
 CFC-115          2009.0        0.0    15461.7     1244.1       8.36        0.0        0.0        0.0        0.0     1590.3    12341.6    15461.5    18578.6      136.4      982.8     1242.0     1517.5       0.00       8.36       8.36       8.36
 CFC-115          2010.0        0.0    14217.6     1142.4       8.39        0.0        0.0        0.0        0.0     1553.9    11174.5    14215.3    17275.4      118.0      915.0     1141.0     1378.0       0.01       8.38       8.39       8.40
 CFC-115          2011.0        0.0    13075.2     1049.2       8.42        0.0        0.0        0.0        0.0     1521.7    10105.0    13067.8    16080.0      102.6      850.7     1048.1     1253.4       0.01       8.40       8.42       8.44
 CFC-115          2012.0        0.0    12026.0      963.7       8.45        0.0        0.0        0.0        0.0     1491.4     9130.8    12015.0    14981.5       90.0      789.1      963.0     1142.0       0.01       8.42       8.45       8.48
 CFC-115          2013.0        0.0    11062.3      885.2       8.47        0.0        0.0        0.0        0.0     1461.1     8241.2    11046.4    13969.1       79.7      730.2      884.7     1042.7       0.02       8.43       8.47       8.51
 CFC-115          2014.0        0.0    10177.1      813.3       8.49        0.0        0.0        0.0        0.0     1430.0     7434.6    10155.7    13041.7       71.5      674.0      812.9      954.4       0.02       8.44       8.49       8.53
 CFC-115          2015.0        0.0     9363.8      747.3       8.50        0.0        0.0        0.0        0.0     1397.4     6699.4     9337.8    12181.7       65.0      620.1      747.0      875.4       0.03       8.45       8.50       8.55
 CFC-115          2016.0        0.0     8616.6      686.7       8.52        0.0        0.0        0.0        0.0     1363.3     6034.8     8585.1    11383.7       60.1      568.4      686.7      804.6       0.03       8.46       8.52       8.57
 CFC-115          2017.0        0.0     7929.9      631.1       8.53        0.0        0.0        0.0        0.0     1327.5     5433.1     7892.7    10642.7       56.4      519.5      631.4      740.9       0.03       8.47       8.53       8.59
 CFC-115          2018.0        0.0     7298.8      580.1       8.54        0.0        0.0        0.0        0.0     1290.2     4891.6     7255.7     9954.0       53.6      473.1      580.6      683.7       0.04       8.47       8.54       8.61
 CFC-115          2019.0        0.0     6718.7      533.2       8.54        0.0        0.0        0.0        0.0     1251.6     4400.2     6671.0     9309.5       51.5      429.6      534.1      631.9       0.04       8.47       8.55       8.62
 CFC-115          2020.0        0.0     6185.5      490.3       8.55        0.0        0.0        0.0        0.0     1211.9     3959.4     6132.6     8710.9       49.8      389.1      491.3      585.0       0.04       8.47       8.55       8.63
 CFC-115          2021.0        0.0     5695.2      450.8       8.55        0.0        0.0        0.0        0.0     1171.4     3561.1     5638.8     8153.9       48.4      352.0      452.0      542.4       0.04       8.47       8.55       8.64
 CFC-115          2022.0        0.0     5244.4      414.5       8.56        0.0        0.0        0.0        0.0     1130.3     3201.4     5184.4     7630.1       47.3      318.1      415.8      503.7       0.05       8.46       8.56       8.65
 CFC-115          2023.0        0.0     4829.9      381.3       8.56        0.0        0.0        0.0        0.0     1089.0     2878.3     4767.0     7146.2       46.2      287.1      382.5      468.2       0.05       8.46       8.56       8.65
 CFC-115          2024.0        0.0     4448.6      350.7       8.56        0.0        0.0        0.0        0.0     1047.6     2587.6     4382.6     6689.9       45.1      258.9      351.9      435.8       0.05       8.45       8.56       8.66
 CFC-115          2025.0        0.0     4097.9      322.6       8.55        0.0        0.0        0.0        0.0     1006.3     2325.0     4029.3     6263.2       44.1      233.3      323.7      405.9       0.05       8.45       8.55       8.66
 CFC-115          2026.0        0.0     3775.3      296.8       8.55        0.0        0.0        0.0        0.0      965.4     2089.5     3704.9     5864.8       43.0      210.1      297.7      378.4       0.06       8.44       8.55       8.66
 CFC-115          2027.0        0.0     3478.5      273.1       8.55        0.0        0.0        0.0        0.0      925.1     1877.9     3406.2     5494.5       41.9      189.2      273.8      353.1       0.06       8.43       8.55       8.66
 CFC-115          2028.0        0.0     3205.4      251.3       8.54        0.0        0.0        0.0        0.0      885.3     1687.3     3131.8     5146.7       40.8      170.2      251.8      329.7       0.06       8.42       8.54       8.66
 CFC-115          2029.0        0.0     2954.1      231.3       8.53        0.0        0.0        0.0        0.0      846.4     1515.8     2879.7     4821.3       39.6      153.2      231.6      308.0       0.07       8.41       8.54       8.66
 CFC-115          2030.0        0.0     2722.8      212.9       8.53        0.0        0.0        0.0        0.0      808.4     1361.7     2647.6     4516.3       38.4      137.8      212.9      287.9       0.07       8.39       8.53       8.66
 CFC-115          2031.0        0.0     2509.9      196.0       8.52        0.0        0.0        0.0        0.0      771.3     1223.8     2434.0     4230.8       37.2      123.9      195.8      269.2       0.07       8.38       8.52       8.66
 CFC-115          2032.0        0.0     2313.9      180.5       8.51        0.0        0.0        0.0        0.0      735.3     1099.2     2237.9     3962.7       35.9      111.4      180.0      251.8       0.07       8.37       8.51       8.66
 CFC-115          2033.0        0.0     2133.4      166.2       8.50        0.0        0.0        0.0        0.0      700.4      987.2     2057.3     3714.1       34.7      100.2      165.6      235.5       0.08       8.35       8.50       8.65
 CFC-115          2034.0        0.0     1967.3      153.0       8.49        0.0        0.0        0.0        0.0      666.7      886.8     1891.3     3481.6       33.4       90.0      152.3      220.4       0.08       8.34       8.50       8.65
 CFC-115          2035.0        0.0     1814.2      140.9       8.49        0.0        0.0        0.0        0.0      634.0      796.6     1739.1     3262.7       32.1       80.9      140.0      206.3       0.08       8.32       8.49       8.65
 CFC-115          2036.0        0.0     1673.3      129.8       8.48        0.0        0.0        0.0        0.0      602.6      715.2     1599.0     3057.9       30.8       72.7      128.7      193.1       0.08       8.31       8.48       8.64
 CFC-115          2037.0        0.0     1543.5      119.6       8.46        0.0        0.0        0.0        0.0      572.4      642.5     1469.9     2866.2       29.6       65.3      118.4      180.8       0.09       8.29       8.46       8.64
 CFC-115          2038.0        0.0     1423.9      110.2       8.45        0.0        0.0        0.0        0.0      543.3      577.1     1351.5     2686.8       28.3       58.7      108.8      169.3       0.09       8.28       8.45       8.63
 CFC-115          2039.0        0.0     1313.8      101.5       8.44        0.0        0.0        0.0        0.0      515.5      518.2     1242.7     2517.8       27.1       52.7      100.1      158.5       0.09       8.26       8.44       8.62
 CFC-115          2040.0        0.0     1212.3       93.5       8.43        0.0        0.0        0.0        0.0      488.8      465.3     1142.6     2359.9       25.9       47.4       92.0      148.5       0.09       8.24       8.43       8.62
 CFC-115          2041.0        0.0     1118.7       86.2       8.42        0.0        0.0        0.0        0.0      463.3      417.8     1050.5     2211.6       24.8       42.6       84.6      139.0       0.10       8.23       8.42       8.61
 CFC-115          2042.0        0.0     1032.5       79.5       8.41        0.0        0.0        0.0        0.0      438.8      375.3      966.0     2073.3       23.6       38.2       77.8      130.3       0.10       8.21       8.41       8.60
 CFC-115          2043.0        0.0      953.0       73.3       8.39        0.0        0.0        0.0        0.0      415.5      337.0      888.0     1943.9       22.5       34.3       71.5      122.0       0.10       8.19       8.39       8.60
 CFC-115          2044.0        0.0      879.8       67.5       8.38        0.0        0.0        0.0        0.0      393.3      302.6      816.4     1822.6       21.5       30.8       65.8      114.3       0.11       8.18       8.38       8.59
 CFC-115          2045.0        0.0      812.3       62.3       8.37        0.0        0.0        0.0        0.0      372.1      271.7      750.6     1708.7       20.4       27.7       60.5      107.1       0.11       8.16       8.37       8.58
 CFC-115          2046.0        0.0      750.0       57.4       8.36        0.0        0.0        0.0        0.0      351.9      243.9      690.1     1601.8       19.4       24.9       55.6      100.4       0.11       8.14       8.36       8.57
 CFC-115          2047.0        0.0      692.6       53.0       8.34        0.0        0.0        0.0        0.0      332.7      219.2      634.6     1501.8       18.5       22.3       51.1       94.0       0.11       8.12       8.34       8.56
 CFC-115          2048.0        0.0      639.6       48.8       8.33        0.0        0.0        0.0        0.0      314.5      196.8      583.4     1408.1       17.5       20.1       47.0       88.1       0.11       8.10       8.33       8.56
 CFC-115          2049.0        0.0      590.8       45.1       8.32        0.0        0.0        0.0        0.0      297.1      176.7      536.4     1320.0       16.6       18.0       43.2       82.6       0.12       8.09       8.32       8.55
 CFC-115          2050.0        0.0      545.7       41.6       8.30        0.0        0.0        0.0        0.0      280.7      158.6      493.1     1237.3       15.8       16.2       39.7       77.4       0.12       8.07       8.30       8.54
 CFC-115          2051.0        0.0      504.2       38.3       8.29        0.0        0.0        0.0        0.0      265.1      142.4      453.3     1160.0       15.0       14.5       36.5       72.5       0.12       8.05       8.29       8.53
 CFC-115          2052.0        0.0      465.8       35.4       8.27        0.0        0.0        0.0        0.0      250.2      127.8      416.8     1087.4       14.2       13.1       33.6       68.0       0.12       8.03       8.27       8.52
 CFC-115          2053.0        0.0      430.4       32.7       8.26        0.0        0.0        0.0        0.0      236.2      114.8      383.2     1019.7       13.4       11.7       30.9       63.7       0.13       8.01       8.26       8.51
 CFC-115          2054.0        0.0      397.8       30.1       8.25        0.0        0.0        0.0        0.0      222.9      103.0      352.3      955.9       12.7       10.5       28.4       59.7       0.13       8.00       8.25       8.50
 CFC-115          2055.0        0.0      367.6       27.8       8.23        0.0        0.0        0.0        0.0      210.3       92.5      323.9      896.5       12.0        9.4       26.1       56.0       0.13       7.98       8.23       8.49
 CFC-115          2056.0        0.0      339.8       25.7       8.22        0.0        0.0        0.0        0.0      198.4       83.0      297.8      840.6       11.4        8.5       24.0       52.5       0.13       7.96       8.22       8.48
 CFC-115          2057.0        0.0      314.2       23.7       8.20        0.0        0.0        0.0        0.0      187.1       74.5      273.8      787.9       10.8        7.6       22.1       49.2       0.14       7.94       8.20       8.47
 CFC-115          2058.0        0.0      290.4       21.9       8.19        0.0        0.0        0.0        0.0      176.4       66.9      251.7      738.7       10.2        6.8       20.3       46.1       0.14       7.92       8.19       8.46
 CFC-115          2059.0        0.0      268.6       20.2       8.18        0.0        0.0        0.0        0.0      166.3       60.1      231.4      692.5        9.6        6.1       18.7       43.2       0.14       7.90       8.18       8.45
 CFC-115          2060.0        0.0      248.3       18.7       8.16        0.0        0.0        0.0        0.0      156.8       54.0      212.8      649.1        9.1        5.5       17.2       40.5       0.14       7.88       8.16       8.44
 CFC-115          2061.0        0.0      229.7       17.2       8.15        0.0        0.0        0.0        0.0      147.7       48.4      195.6      608.6        8.6        4.9       15.8       38.0       0.14       7.87       8.15       8.43
 CFC-115          2062.0        0.0      212.4       15.9       8.13        0.0        0.0        0.0        0.0      139.2       43.5      179.9      570.5        8.1        4.4       14.5       35.6       0.15       7.85       8.13       8.42
 CFC-115          2063.0        0.0      196.5       14.7       8.12        0.0        0.0        0.0        0.0      131.2       39.0      165.4      534.9        7.7        4.0       13.3       33.4       0.15       7.83       8.12       8.41
 CFC-115          2064.0        0.0      181.8       13.6       8.10        0.0        0.0        0.0        0.0      123.6       35.0      152.0      501.5        7.2        3.6       12.3       31.3       0.15       7.81       8.10       8.40
 CFC-115          2065.0        0.0      168.2       12.6       8.09        0.0        0.0        0.0        0.0      116.4       31.4      139.8      470.4        6.8        3.2       11.3       29.4       0.15       7.79       8.09       8.39
 CFC-115          2066.0        0.0      155.6       11.6       8.08        0.0        0.0        0.0        0.0      109.7       28.2      128.5      441.0        6.4        2.9       10.4       27.5       0.16       7.77       8.07       8.38
 CFC-115          2067.0        0.0      144.0       10.7       8.06        0.0        0.0        0.0        0.0      103.3       25.3      118.1      413.6        6.1        2.6        9.5       25.8       0.16       7.75       8.06       8.37
 CFC-115          2068.0        0.0      133.3        9.9       8.05        0.0        0.0        0.0        0.0       97.3       22.7      108.6      387.6        5.7        2.3        8.8       24.2       0.16       7.74       8.05       8.36
 CFC-115          2069.0        0.0      123.4        9.2       8.03        0.0        0.0        0.0        0.0       91.6       20.4       99.8      363.4        5.4        2.1        8.0       22.7       0.16       7.72       8.03       8.35
 CFC-115          2070.0        0.0      114.2        8.5       8.02        0.0        0.0        0.0        0.0       86.3       18.3       91.8      340.9        5.1        1.9        7.4       21.3       0.16       7.70       8.02       8.34
 CFC-115          2071.0        0.0      105.7        7.8       8.00        0.0        0.0        0.0        0.0       81.2       16.5       84.4      319.7        4.8        1.7        6.8       19.9       0.17       7.68       8.00       8.33
 CFC-115          2072.0        0.0       97.9        7.2       7.99        0.0        0.0        0.0        0.0       76.5       14.8       77.6      299.7        4.5        1.5        6.3       18.7       0.17       7.66       7.99       8.32
 CFC-115          2073.0        0.0       90.6        6.7       7.97        0.0        0.0        0.0        0.0       72.0       13.3       71.3      281.0        4.3        1.4        5.8       17.5       0.17       7.64       7.97       8.31
 CFC-115          2074.0        0.0       83.9        6.2       7.96        0.0        0.0        0.0        0.0       67.8       11.9       65.6      263.4        4.0        1.2        5.3       16.4       0.17       7.63       7.96       8.30
 CFC-115          2075.0        0.0       77.7        5.7       7.95        0.0        0.0        0.0        0.0       63.8       10.7       60.3      247.0        3.8        1.1        4.9       15.4       0.18       7.61       7.94       8.29
 CFC-115          2076.0        0.0       72.0        5.3       7.93        0.0        0.0        0.0        0.0       60.1        9.6       55.4      231.5        3.6        1.0        4.5       14.4       0.18       7.59       7.93       8.28
 CFC-115          2077.0        0.0       66.7        4.9       7.92        0.0        0.0        0.0        0.0       56.5        8.6       50.9      217.1        3.3        0.9        4.1       13.5       0.18       7.57       7.92       8.27
 CFC-115          2078.0        0.0       61.8        4.5       7.90        0.0        0.0        0.0        0.0       53.2        7.7       46.8      203.6        3.1        0.8        3.8       12.7       0.18       7.55       7.90       8.26
 CFC-115          2079.0        0.0       57.3        4.2       7.89        0.0        0.0        0.0        0.0       50.1        6.9       43.1      190.9        3.0        0.7        3.5       11.9       0.18       7.53       7.89       8.25
 CFC-115          2080.0        0.0       53.1        3.9       7.87        0.0        0.0        0.0        0.0       47.1        6.2       39.6      179.0        2.8        0.6        3.2       11.2       0.19       7.52       7.87       8.24
 CFC-115          2081.0        0.0       49.2        3.6       7.86        0.0        0.0        0.0        0.0       44.4        5.6       36.4      167.8        2.6        0.6        2.9       10.5       0.19       7.50       7.86       8.23
 CFC-115          2082.0        0.0       45.6        3.3       7.84        0.0        0.0        0.0        0.0       41.7        5.0       33.5      157.3        2.5        0.5        2.7        9.8       0.19       7.48       7.84       8.22
 CFC-115          2083.0        0.0       42.2        3.1       7.83        0.0        0.0        0.0        0.0       39.3        4.5       30.8      147.5        2.3        0.5        2.5        9.2       0.19       7.46       7.83       8.21
 CFC-115          2084.0        0.0       39.1        2.9       7.82        0.0        0.0        0.0        0.0       37.0        4.0       28.3      138.3        2.2        0.4        2.3        8.6       0.19       7.44       7.81       8.20
 CFC-115          2085.0        0.0       36.3        2.6       7.80        0.0        0.0        0.0        0.0       34.8        3.6       26.0      129.7        2.1        0.4        2.1        8.1       0.20       7.42       7.80       8.19
 CFC-115          2086.0        0.0       33.7        2.4       7.79        0.0        0.0        0.0        0.0       32.8        3.3       23.9      121.6        1.9        0.3        1.9        7.6       0.20       7.41       7.79       8.18
 CFC-115          2087.0        0.0       31.2        2.3       7.77        0.0        0.0        0.0        0.0       30.8        2.9       22.0      114.0        1.8        0.3        1.8        7.1       0.20       7.39       7.77       8.17
 CFC-115          2088.0        0.0       28.9        2.1       7.76        0.0        0.0        0.0        0.0       29.0        2.6       20.2      106.9        1.7        0.3        1.6        6.7       0.20       7.37       7.76       8.16
 CFC-115          2089.0        0.0       26.8        1.9       7.75        0.0        0.0        0.0        0.0       27.3        2.4       18.6      100.3        1.6        0.2        1.5        6.3       0.20       7.35       7.74       8.15
 CFC-115          2090.0        0.0       24.9        1.8       7.73        0.0        0.0        0.0        0.0       25.7        2.1       17.1       94.0        1.5        0.2        1.4        5.9       0.21       7.33       7.73       8.14
 CFC-115          2091.0        0.0       23.1        1.7       7.72        0.0        0.0        0.0        0.0       24.2        1.9       15.7       88.1        1.4        0.2        1.3        5.5       0.21       7.32       7.71       8.13
 CFC-115          2092.0        0.0       21.4        1.5       7.70        0.0        0.0        0.0        0.0       22.8        1.7       14.4       82.7        1.3        0.2        1.2        5.2       0.21       7.30       7.70       8.12
 CFC-115          2093.0        0.0       19.9        1.4       7.69        0.0        0.0        0.0        0.0       21.4        1.5       13.3       77.5        1.3        0.2        1.1        4.8       0.21       7.28       7.69       8.11
 CFC-115          2094.0        0.0       18.4        1.3       7.67        0.0        0.0        0.0        0.0       20.2        1.4       12.2       72.7        1.2        0.1        1.0        4.5       0.21       7.26       7.67       8.10
 CFC-115          2095.0        0.0       17.1        1.2       7.66        0.0        0.0        0.0        0.0       19.0        1.2       11.2       68.2        1.1        0.1        0.9        4.2       0.22       7.25       7.66       8.09
 CFC-115          2096.0        0.0       15.9        1.1       7.65        0.0        0.0        0.0        0.0       17.9        1.1       10.3       63.9        1.1        0.1        0.8        4.0       0.22       7.23       7.64       8.08
 CFC-115          2097.0        0.0       14.7        1.1       7.63        0.0        0.0        0.0        0.0       16.8        1.0        9.5       60.0        1.0        0.1        0.8        3.7       0.22       7.21       7.63       8.07
 CFC-115          2098.0        0.0       13.7        1.0       7.62        0.0        0.0        0.0        0.0       15.8        0.9        8.7       56.2        0.9        0.1        0.7        3.5       0.22       7.19       7.62       8.06
 CFC-115          2099.0        0.0       12.7        0.9       7.60        0.0        0.0        0.0        0.0       14.9        0.8        8.0       52.7        0.9        0.1        0.6        3.3       0.22       7.18       7.60       8.05
 CFC-115          2100.0        0.0       11.8        0.8       7.59        0.0        0.0        0.0        0.0       14.0        0.7        7.4       49.4        0.8        0.1        0.6        3.1       0.22       7.16       7.59       8.04
 CFC-115          2101.0        0.0       11.0        0.8       7.58        0.0        0.0        0.0        0.0       13.2        0.6        6.8       46.4        0.8        0.1        0.5        2.9       0.23       7.14       7.57       8.03
 CFC-115          2102.0        0.0       10.2        0.7       7.56        0.0        0.0        0.0        0.0       12.4        0.6        6.2       43.5        0.7        0.1        0.5        2.7       0.23       7.12       7.56       8.02
 CFC-115          2103.0        0.0        9.4        0.7       7.55        0.0        0.0        0.0        0.0       11.7        0.5        5.7       40.8        0.7        0.1        0.5        2.5       0.23       7.11       7.55       8.01
 CFC-115          2104.0        0.0        8.8        0.6       7.53        0.0        0.0        0.0        0.0       11.0        0.5        5.3       38.2        0.6        0.0        0.4        2.4       0.23       7.09       7.53       8.00
 CFC-115          2105.0        0.0        8.1        0.6       7.52        0.0        0.0        0.0        0.0       10.4        0.4        4.8       35.8        0.6        0.0        0.4        2.2       0.23       7.07       7.52       7.99
 CFC-115          2106.0        0.0        7.6        0.5       7.51        0.0        0.0        0.0        0.0        9.8        0.4        4.4       33.6        0.6        0.0        0.4        2.1       0.24       7.05       7.50       7.98
 CFC-115          2107.0        0.0        7.0        0.5       7.49        0.0        0.0        0.0        0.0        9.2        0.3        4.1       31.5        0.5        0.0        0.3        2.0       0.24       7.04       7.49       7.97
 CFC-115          2108.0        0.0        6.5        0.5       7.48        0.0        0.0        0.0        0.0        8.7        0.3        3.8       29.6        0.5        0.0        0.3        1.8       0.24       7.02       7.48       7.96
 CFC-115          2109.0        0.0        6.1        0.4       7.47        0.0        0.0        0.0        0.0        8.2        0.3        3.5       27.7        0.5        0.0        0.3        1.7       0.24       7.00       7.46       7.95
 CFC-115          2110.0        0.0        5.6        0.4       7.45        0.0        0.0        0.0        0.0        7.7        0.2        3.2       26.0        0.5        0.0        0.3        1.6       0.24       6.98       7.45       7.94
 CFC-115          2111.0        0.0        5.2        0.4       7.44        0.0        0.0        0.0        0.0        7.2        0.2        2.9       24.4        0.4        0.0        0.2        1.5       0.25       6.97       7.43       7.93
 CFC-115          2112.0        0.0        4.9        0.3       7.42        0.0        0.0        0.0        0.0        6.8        0.2        2.7       22.8        0.4        0.0        0.2        1.4       0.25       6.95       7.42       7.92
 CFC-115          2113.0        0.0        4.5        0.3       7.41        0.0        0.0        0.0        0.0        6.4        0.2        2.5       21.4        0.4        0.0        0.2        1.3       0.25       6.93       7.41       7.91
 CFC-115          2114.0        0.0        4.2        0.3       7.40        0.0        0.0        0.0        0.0        6.0        0.2        2.3       20.1        0.4        0.0        0.2        1.3       0.25       6.92       7.39       7.90
 CFC-115          2115.0        0.0        3.9        0.3       7.38        0.0        0.0        0.0        0.0        5.7        0.1        2.1       18.8        0.3        0.0        0.2        1.2       0.25       6.90       7.38       7.89
 CFC-115          2116.0        0.0        3.6        0.3       7.37        0.0        0.0        0.0        0.0        5.4        0.1        1.9       17.7        0.3        0.0        0.2        1.1       0.25       6.88       7.37       7.88
 CFC-115          2117.0        0.0        3.4        0.2       7.36        0.0        0.0        0.0        0.0        5.1        0.1        1.8       16.6        0.3        0.0        0.1        1.0       0.26       6.87       7.35       7.87
 CFC-115          2118.0        0.0        3.1        0.2       7.34        0.0        0.0        0.0        0.0        4.8        0.1        1.6       15.5        0.3        0.0        0.1        1.0       0.26       6.85       7.34       7.86
 CFC-115          2119.0        0.0        2.9        0.2       7.33        0.0        0.0        0.0        0.0        4.5        0.1        1.5       14.6        0.3        0.0        0.1        0.9       0.26       6.83       7.33       7.85
 CFC-115          2120.0        0.0        2.7        0.2       7.32        0.0        0.0        0.0        0.0        4.2        0.1        1.4       13.7        0.2        0.0        0.1        0.9       0.26       6.82       7.31       7.84
 
 Species            Year  Prod_mean  Bank_mean  Emis_mean   Mix_mean  Prod_stdv  Prod_2.5p   Prod_50p Prod_97.5p  Bank_stdv  Bank_2.5p   Bank_50p Bank_97.5p  Emis_stdv  Emis_2.5p   Emis_50p Emis_97.5p   Mix_stdv   Mix_2.5p    Mix_50p  Mix_97.5p
 CCl4             1950.0   953700.0        0.0    91645.1      34.54    47659.6   860264.9   953700.5  1047136.8        0.0        0.0        0.0        0.0     5832.4    80418.7    91565.4   103310.7       0.00      34.54      34.54      34.54
 CCl4             1951.0    65000.0        0.0    60182.3      36.96     3248.3    58631.9    65000.0    71368.2        0.0        0.0        0.0        0.0     5692.1    49158.3    60124.1    71483.5       0.00      36.96      36.96      36.96
 CCl4             1952.0    70000.0        0.0    65030.4      38.09     3498.1    63142.0    70000.0    76858.1        0.0        0.0        0.0        0.0     5902.6    53597.8    64968.1    76758.8       0.00      38.09      38.09      38.09
 CCl4             1953.0    75000.0        0.0    69859.9      39.36     3748.0    67652.2    75000.0    82348.0        0.0        0.0        0.0        0.0     6134.1    57983.8    69794.2    82061.7       0.00      39.36      39.36      39.36
 CCl4             1954.0    80000.0        0.0    74670.5      40.78     3997.9    72162.3    80000.0    87837.8        0.0        0.0        0.0        0.0     6385.4    62314.0    74599.3    87373.0       0.00      40.78      40.78      40.78
 CCl4             1955.0    85000.0        0.0    79462.9      42.34     4247.7    76672.5    85000.0    93327.7        0.0        0.0        0.0        0.0     6655.5    66589.7    79389.1    92712.4       0.00      42.34      42.34      42.34
 CCl4             1956.0    90000.0        0.0    84238.8      44.04     4497.6    81182.6    90000.0    98817.6        0.0        0.0        0.0        0.0     6943.6    70812.1    84160.4    98067.9       0.00      44.04      44.04      44.04
 CCl4             1957.0    95000.0        0.0    88997.6      45.87     4747.5    85692.7    95000.0   104307.4        0.0        0.0        0.0        0.0     7248.8    74985.1    88914.3   103435.7       0.00      45.87      45.87      45.87
 CCl4             1958.0   100000.0        0.0    93740.8      47.82     4997.3    90202.9   100000.0   109797.3        0.0        0.0        0.0        0.0     7570.2    79107.8    93653.2   108823.3       0.00      47.82      47.82      47.82
 CCl4             1959.0   105000.0        0.0    98468.4      49.89     5247.2    94713.0   105000.0   115287.1        0.0        0.0        0.0        0.0     7907.3    83185.2    98378.9   114221.5       0.00      49.89      49.89      49.89
 CCl4             1960.0   110000.0        0.0   103181.7      52.08     5497.1    99223.2   110000.1   120777.0        0.0        0.0        0.0        0.0     8259.4    87220.8   103087.7   119638.5       0.00      52.08      52.08      52.08
 CCl4             1961.0   115000.0        0.0   107880.2      54.37     5746.9   103733.3   115000.1   126266.9        0.0        0.0        0.0        0.0     8626.0    91210.7   107782.9   125067.4       0.00      54.37      54.37      54.37
 CCl4             1962.0   119000.0        0.0   111567.4      56.78     5946.8   107341.4   119000.1   130658.8        0.0        0.0        0.0        0.0     8992.5    94185.5   111464.1   129482.7       0.00      56.78      56.78      56.78
 CCl4             1963.0   123000.0        0.0   115246.0      59.25     6146.7   110949.5   123000.1   135050.7        0.0        0.0        0.0        0.0     9367.5    97135.7   115137.5   133905.9       0.00      59.25      59.25      59.25
 CCl4             1964.0   127000.0        0.0   118916.5      61.78     6346.6   114557.7   127000.1   139442.5        0.0        0.0        0.0        0.0     9750.6   100063.3   118806.0   138335.1       0.00      61.78      61.78      61.78
 CCl4             1965.0   127000.0        0.0   118586.8      64.37     6346.6   114557.7   127000.1   139442.5        0.0        0.0        0.0        0.0    10088.3    99064.5   118472.8   138656.8       0.00      64.37      64.37      64.37
 CCl4             1966.0   127000.0        0.0   118268.6      66.86     6346.6   114557.7   127000.1   139442.5        0.0        0.0        0.0        0.0    10415.0    98105.9   118156.2   138980.7       0.00      66.86      66.86      66.86
 CCl4             1967.0   127000.0        0.0   117962.9      69.26     6346.6   114557.7   127000.1   139442.5        0.0        0.0        0.0        0.0    10730.9    97178.4   117848.8   139290.1       0.00      69.26      69.26      69.26
 CCl4             1968.0   127000.0        0.0   117668.6      71.57     6346.6   114557.7   127000.1   139442.5        0.0        0.0        0.0        0.0    11036.1    96300.9   117555.5   139592.5       0.00      71.57      71.57      71.57
 CCl4             1969.0   127000.0        0.0   117385.6      73.79     6346.6   114557.7   127000.1   139442.5        0.0        0.0        0.0        0.0    11331.0    95438.1   117271.0   139871.2       0.00      73.79      73.79      73.79
 CCl4             1970.0   127000.0        0.0   117113.3      75.93     6346.6   114557.7   127000.1   139442.5        0.0        0.0        0.0        0.0    11615.6    94609.8   117000.3   140160.2       0.00      75.93      75.93      75.93
 CCl4             1971.0   127000.0        0.0   116850.8      77.99     6346.6   114557.7   127000.1   139442.5        0.0        0.0        0.0        0.0    11890.3    93806.9   116735.9   140439.6       0.00      77.99      77.99      77.99
 CCl4             1972.0   127000.0        0.0   116598.9      79.97     6346.6   114557.7   127000.1   139442.5        0.0        0.0        0.0        0.0    12155.3    93027.2   116486.8   140706.0       0.00      79.97      79.97      79.97
 CCl4             1973.0   127000.0        0.0   116355.8      81.87     6346.6   114557.7   127000.1   139442.5        0.0        0.0        0.0        0.0    12410.9    92276.7   116244.8   140962.0       0.00      81.87      81.87      81.87
 CCl4             1974.0   127000.0        0.0   116122.4      83.70     6346.6   114557.7   127000.1   139442.5        0.0        0.0        0.0        0.0    12657.5    91555.4   116015.3   141200.7       0.00      83.70      83.70      83.70
 CCl4             1975.0   127000.0        0.0   115897.4      85.47     6346.6   114557.7   127000.1   139442.5        0.0        0.0        0.0        0.0    12895.1    90853.9   115786.8   141453.3       0.00      85.47      85.47      85.47
 CCl4             1976.0   127000.0        0.0   115681.2      87.17     6346.6   114557.7   127000.1   139442.5        0.0        0.0        0.0        0.0    13124.2    90191.1   115570.7   141681.4       0.00      87.17      87.17      87.17
 CCl4             1977.0   127000.0        0.0   115472.9      88.80     6346.6   114557.7   127000.1   139442.5        0.0        0.0        0.0        0.0    13345.0    89554.5   115358.3   141913.6       0.00      88.80      88.80      88.80
 CCl4             1978.0   127000.0        0.0   115272.7      90.37     6346.6   114557.7   127000.1   139442.5        0.0        0.0        0.0        0.0    13557.8    88939.7   115162.0   142126.7       0.00      90.37      90.37      90.37
 CCl4             1979.0   127000.0        0.0   115080.3      91.88     6346.6   114557.7   127000.1   139442.5        0.0        0.0        0.0        0.0    13762.8    88346.8   114971.1   142340.4       0.00      91.88      91.88      91.88
 CCl4             1980.0   128660.0        0.0   116551.8      93.34     6429.6   116055.0   128660.1   141265.2        0.0        0.0        0.0        0.0    13977.2    89400.2   116441.2   144234.6       0.00      93.34      93.34      93.34
 CCl4             1981.0   118416.4        0.0   106138.4      94.80     5917.7   106815.0   118416.4   130018.0        0.0        0.0        0.0        0.0    14075.8    78757.5   106040.8   133960.7       0.00      94.80      94.80      94.80
 CCl4             1982.0   126760.8        0.0   114339.9      95.81     6334.7   114341.9   126760.9   139179.9        0.0        0.0        0.0        0.0    14294.7    86540.5   114236.3   142640.7       0.00      95.81      95.81      95.81
 CCl4             1983.0   123817.2        0.0   111236.0      97.11     6187.6   111686.7   123817.3   135947.9        0.0        0.0        0.0        0.0    14442.8    83139.1   111132.0   139808.8       0.00      97.11      97.11      97.11
 CCl4             1984.0   131407.3        0.0   118668.8      98.25     6566.9   118533.2   131407.4   144281.7        0.0        0.0        0.0        0.0    14671.7    90142.3   118562.5   147712.1       0.00      98.25      98.25      98.25
 CCl4             1985.0   126345.3        0.0   113438.9      99.63     6313.9   113967.1   126345.4   138723.8        0.0        0.0        0.0        0.0    14811.0    84625.3   113332.1   142735.5       0.00      99.63      99.63      99.63
 CCl4             1986.0   143976.0        0.0   130895.0     100.77     7195.0   129870.5   143976.0   158081.7        0.0        0.0        0.0        0.0    15142.4   101484.9   130764.7   160897.1       0.00     100.77     100.77     100.77
 CCl4             1987.0   125874.8        0.0   112597.6     102.55     6290.4   113542.7   125874.8   138207.1        0.0        0.0        0.0        0.0    15204.8    83019.3   112493.5   142637.1       0.00     102.55     102.55     102.55
 CCl4             1988.0   134564.3        0.0   121143.9     103.56     6724.6   121380.9   134564.3   147747.9        0.0        0.0        0.0        0.0    15425.7    91137.0   121030.5   151667.0       0.00     103.56     103.56     103.56
 CCl4             1989.0   145421.0        0.0   131816.0     104.86     7267.2   131174.0   145421.1   159668.4        0.0        0.0        0.0        0.0    15712.1   101295.0   131690.5   162936.3       0.00     104.86     104.86     104.86
 CCl4             1990.0    97589.6        0.0    83849.5     106.54     4876.9    88028.6    97589.7   107150.7        0.0        0.0        0.0        0.0    15515.4    53621.1    83750.6   114455.0       0.00     106.54     106.54     106.54
 CCl4             1991.0    77763.0        0.0    64085.6     106.30     3886.1    70144.4    77763.0    85381.6        0.0        0.0        0.0        0.0    15342.4    34180.3    64008.7    94359.8       0.00     106.30     106.30     106.30
 CCl4             1992.0    86270.0        0.0    72705.9     105.31     4311.2    77818.1    86270.1    94722.2        0.0        0.0        0.0        0.0    15261.0    42955.4    72620.0   102814.1       0.00     105.31     105.31     105.31
 CCl4             1993.0    83211.4        0.0    69732.5     104.68     4158.4    75059.0    83211.4    91363.8        0.0        0.0        0.0        0.0    15152.0    40196.8    69649.1    99630.1       0.00     104.68     104.68     104.68
 CCl4             1994.0    81744.4        0.0    68360.2     103.95     4085.0    73735.8    81744.4    89753.1        0.0        0.0        0.0        0.0    15041.0    39036.8    68279.7    98036.1       0.00     103.95     103.95     103.95
 CCl4             1995.0    83447.4        0.0    70156.8     103.20     4170.1    75272.0    83447.5    91623.0        0.0        0.0        0.0        0.0    14947.7    41015.5    70073.6    99650.1       0.00     103.20     103.20     103.20
 CCl4             1996.0    68936.8        0.0    55754.1     102.54     3445.0    62183.0    68936.8    75690.7        0.0        0.0        0.0        0.0    14760.0    26973.1    55693.6    84876.0       0.00     102.54     102.54     102.54
 CCl4             1997.0    77141.6        0.0    64097.9     101.34     3855.0    69583.9    77141.6    84699.4        0.0        0.0        0.0        0.0    14646.0    35545.2    64022.6    92990.0       0.00     101.34     101.34     101.34
 CCl4             1998.0    79153.8        0.0    66212.9     100.51     3955.6    71399.0    79153.9    86908.8        0.0        0.0        0.0        0.0    14543.3    37858.5    66135.5    94909.6       0.00     100.51     100.51     100.51
 CCl4             1999.0    66312.3        0.0    53485.2      99.78     3313.8    59815.6    66312.3    72809.1        0.0        0.0        0.0        0.0    14358.4    25479.1    53427.3    81808.6       0.00      99.78      99.78      99.78
 CCl4             2000.0    73527.6        0.0    60841.2      98.59     3674.4    66324.0    73527.7    80731.3        0.0        0.0        0.0        0.0    14288.0    32975.0    60777.7    89009.5       0.00      98.59      98.59      98.59
 CCl4             2001.0    66092.2        0.0    53528.3      97.72     3302.9    59617.1    66092.3    72567.5        0.0        0.0        0.0        0.0    14118.5    26002.6    53475.2    81343.7       0.04      97.63      97.72      97.80
 CCl4             2002.0    69242.2        0.0    56816.9      96.59     3460.3    62458.5    69242.2    76026.1        0.0        0.0        0.0        0.0    13980.7    29560.2    56735.7    84373.3       0.06      96.48      96.59      96.71
 CCl4             2003.0    70144.0        0.0    57840.0      95.63     3505.3    63271.9    70144.1    77016.2        0.0        0.0        0.0        0.0    13852.9    30860.9    57776.1    85126.8       0.07      95.50      95.63      95.77
 CCl4             2004.0    66548.0        0.0    54362.8      94.74     3325.6    60028.2    66548.0    73067.8        0.0        0.0        0.0        0.0    13703.8    27639.5    54305.8    81381.8       0.08      94.59      94.74      94.89
 CCl4             2005.0    64972.2        0.0    52916.7      93.74     3246.9    58606.8    64972.2    71337.7        0.0        0.0        0.0        0.0    13557.5    26464.8    52855.3    79622.9       0.08      93.59      93.74      93.91
 CCl4             2006.0    62037.1        0.0    50116.5      92.73     3100.2    55959.2    62037.1    68115.0        0.0        0.0        0.0        0.0    13396.5    23992.2    50050.8    76479.5       0.09      92.56      92.73      92.89
 CCl4             2007.0    58707.1        0.0    46931.6      91.63     2933.8    52955.5    58707.1    64458.8        0.0        0.0        0.0        0.0    13225.3    21158.5    46881.6    72999.9       0.09      91.46      91.63      91.81
 CCl4             2008.0    51724.1        0.0    40113.7      90.45     2584.8    46656.6    51724.1    56791.7        0.0        0.0        0.0        0.0    13013.9    14678.4    40069.5    65745.9       0.09      90.27      90.45      90.63
 CCl4             2009.0    47867.1        0.0    47867.1      89.04     2718.8    42469.2    47921.7    52986.7        0.0        0.0        0.0        0.0     2718.8    42469.2    47921.7    52986.7       0.09      88.86      89.04      89.23
 CCl4             2010.0    44329.9        0.0    44329.9      87.98     3170.7    37740.0    44523.4    49822.4        0.0        0.0        0.0        0.0     3170.7    37740.0    44523.4    49822.4       0.48      87.03      87.99      88.88
 CCl4             2011.0    41080.8        0.0    41080.8      86.82     3648.2    33081.1    41418.5    47039.9        0.0        0.0        0.0        0.0     3648.2    33081.1    41418.5    47039.9       0.88      85.04      86.85      88.47
 CCl4             2012.0    38092.1        0.0    38092.1      85.58     4063.8    28822.6    38552.0    44511.2        0.0        0.0        0.0        0.0     4063.8    28822.6    38552.0    44511.2       1.25      83.03      85.62      87.87
 CCl4             2013.0    35339.9        0.0    35339.9      84.26     4400.2    25050.9    35891.5    42170.9        0.0        0.0        0.0        0.0     4400.2    25050.9    35891.5    42170.9       1.58      81.03      84.32      87.11
 CCl4             2014.0    32802.9        0.0    32802.9      82.88     4660.3    21753.0    33419.0    40006.8        0.0        0.0        0.0        0.0     4660.3    21753.0    33419.0    40006.8       1.87      79.04      82.96      86.21
 CCl4             2015.0    30462.4        0.0    30462.4      81.45     4852.3    18879.1    31113.0    37980.9        0.0        0.0        0.0        0.0     4852.3    18879.1    31113.0    37980.9       2.13      77.05      81.55      85.22
 CCl4             2016.0    28301.4        0.0    28301.4      79.98     4985.5    16379.3    28967.6    36087.7        0.0        0.0        0.0        0.0     4985.5    16379.3    28967.6    36087.7       2.37      75.08      80.09      84.13
 CCl4             2017.0    26304.7        0.0    26304.7      78.47     5068.6    14208.7    26971.4    34303.9        0.0        0.0        0.0        0.0     5068.6    14208.7    26971.4    34303.9       2.58      73.12      78.60      82.97
 CCl4             2018.0    24458.7        0.0    24458.7      76.93     5109.3    12332.3    25112.2    32611.7        0.0        0.0        0.0        0.0     5109.3    12332.3    25112.2    32611.7       2.77      71.18      77.07      81.76
 CCl4             2019.0    22750.9        0.0    22750.9      75.37     5114.6    10703.6    23381.2    31025.9        0.0        0.0        0.0        0.0     5114.6    10703.6    23381.2    31025.9       2.94      69.26      75.53      80.49
 CCl4             2020.0    21170.1        0.0    21170.1      73.80     5090.2     9277.2    21764.4    29518.7        0.0        0.0        0.0        0.0     5090.2     9277.2    21764.4    29518.7       3.10      67.37      73.96      79.19
 CCl4             2021.0    19706.1        0.0    19706.1      72.22     5041.2     8048.3    20262.0    28091.1        0.0        0.0        0.0        0.0     5041.2     8048.3    20262.0    28091.1       3.24      65.51      72.39      77.87
 CCl4             2022.0    18349.6        0.0    18349.6      70.64     4972.0     6982.2    18860.1    26728.3        0.0        0.0        0.0        0.0     4972.0     6982.2    18860.1    26728.3       3.37      63.67      70.81      76.52
 CCl4             2023.0    17092.1        0.0    17092.1      69.05     4886.3     6054.7    17557.7    25432.2        0.0        0.0        0.0        0.0     4886.3     6054.7    17557.7    25432.2       3.48      61.85      69.23      75.16
 CCl4             2024.0    15925.9        0.0    15925.9      67.47     4787.3     5248.2    16345.8    24205.0        0.0        0.0        0.0        0.0     4787.3     5248.2    16345.8    24205.0       3.59      60.07      67.64      73.80
 CCl4             2025.0    14843.7        0.0    14843.7      65.90     4677.7     4550.9    15217.0    23045.3        0.0        0.0        0.0        0.0     4677.7     4550.9    15217.0    23045.3       3.68      58.33      66.07      72.43
 CCl4             2026.0    13839.3        0.0    13839.3      64.34     4559.8     3947.7    14164.2    21940.6        0.0        0.0        0.0        0.0     4559.8     3947.7    14164.2    21940.6       3.77      56.61      64.50      71.07
 CCl4             2027.0    12906.5        0.0    12906.5      62.78     4435.8     3423.2    13187.4    20885.6        0.0        0.0        0.0        0.0     4435.8     3423.2    13187.4    20885.6       3.85      54.92      62.94      69.70
 CCl4             2028.0    12040.0        0.0    12040.0      61.25     4307.1     2968.5    12276.2    19882.4        0.0        0.0        0.0        0.0     4307.1     2968.5    12276.2    19882.4       3.92      53.27      61.39      68.34
 CCl4             2029.0    11234.8        0.0    11234.8      59.73     4175.4     2573.9    11427.4    18930.0        0.0        0.0        0.0        0.0     4175.4     2573.9    11427.4    18930.0       3.98      51.65      59.86      66.99
 CCl4             2030.0    10486.2        0.0    10486.2      58.23     4041.8     2231.4    10636.1    18030.1        0.0        0.0        0.0        0.0     4041.8     2231.4    10636.1    18030.1       4.04      50.08      58.35      65.65
 CCl4             2031.0     9790.1        0.0     9790.1      56.75     3907.3     1934.0     9899.5    17175.4        0.0        0.0        0.0        0.0     3907.3     1934.0     9899.5    17175.4       4.10      48.52      56.85      64.33
 CCl4             2032.0     9142.5        0.0     9142.5      55.29     3772.9     1677.8     9213.8    16353.9        0.0        0.0        0.0        0.0     3772.9     1677.8     9213.8    16353.9       4.14      47.01      55.38      63.01
 CCl4             2033.0     8539.8        0.0     8539.8      53.85     3639.2     1454.1     8576.3    15575.8        0.0        0.0        0.0        0.0     3639.2     1454.1     8576.3    15575.8       4.19      45.53      53.93      61.71
 CCl4             2034.0     7978.8        0.0     7978.8      52.44     3506.9     1261.3     7983.5    14833.3        0.0        0.0        0.0        0.0     3506.9     1261.3     7983.5    14833.3       4.22      44.09      52.50      60.42
 CCl4             2035.0     7456.5        0.0     7456.5      51.06     3376.4     1093.0     7431.6    14125.7        0.0        0.0        0.0        0.0     3376.4     1093.0     7431.6    14125.7       4.26      42.69      51.10      59.16
 CCl4             2036.0     6969.9        0.0     6969.9      49.70     3248.3      947.2     6917.0    13452.5        0.0        0.0        0.0        0.0     3248.3      947.2     6917.0    13452.5       4.29      41.32      49.72      57.91
 CCl4             2037.0     6516.6        0.0     6516.6      48.36     3122.7      821.1     6438.1    12814.8        0.0        0.0        0.0        0.0     3122.7      821.1     6438.1    12814.8       4.31      39.98      48.36      56.69
 CCl4             2038.0     6094.1        0.0     6094.1      47.05     3000.1      712.2     5992.5    12205.0        0.0        0.0        0.0        0.0     3000.1      712.2     5992.5    12205.0       4.33      38.68      47.04      55.49
 CCl4             2039.0     5700.3        0.0     5700.3      45.77     2880.5      617.6     5577.8    11626.1        0.0        0.0        0.0        0.0     2880.5      617.6     5577.8    11626.1       4.35      37.41      45.74      54.30
 CCl4             2040.0     5333.0        0.0     5333.0      44.51     2764.2      535.5     5191.9    11077.3        0.0        0.0        0.0        0.0     2764.2      535.5     5191.9    11077.3       4.37      36.18      44.46      53.14
 CCl4             2041.0     4990.5        0.0     4990.5      43.28     2651.3      464.5     4832.3    10550.1        0.0        0.0        0.0        0.0     2651.3      464.5     4832.3    10550.1       4.38      34.99      43.21      51.99
 CCl4             2042.0     4670.9        0.0     4670.9      42.08     2541.8      403.0     4497.4    10051.8        0.0        0.0        0.0        0.0     2541.8      403.0     4497.4    10051.8       4.39      33.82      41.99      50.87
 CCl4             2043.0     4372.7        0.0     4372.7      40.91     2435.9      349.6     4186.2     9575.3        0.0        0.0        0.0        0.0     2435.9      349.6     4186.2     9575.3       4.40      32.68      40.79      49.76
 CCl4             2044.0     4094.3        0.0     4094.3      39.76     2333.5      303.0     3895.9     9121.4        0.0        0.0        0.0        0.0     2333.5      303.0     3895.9     9121.4       4.40      31.58      39.63      48.68
 CCl4             2045.0     3834.4        0.0     3834.4      38.64     2234.6      262.8     3626.2     8689.2        0.0        0.0        0.0        0.0     2234.6      262.8     3626.2     8689.2       4.40      30.51      38.49      47.63
 CCl4             2046.0     3591.7        0.0     3591.7      37.54     2139.2      227.9     3375.2     8278.0        0.0        0.0        0.0        0.0     2139.2      227.9     3375.2     8278.0       4.40      29.47      37.37      46.59
 CCl4             2047.0     3365.0        0.0     3365.0      36.48     2047.4      197.6     3141.3     7886.8        0.0        0.0        0.0        0.0     2047.4      197.6     3141.3     7886.8       4.40      28.46      36.29      45.57
 CCl4             2048.0     3153.1        0.0     3153.1      35.43     1958.9      171.3     2923.7     7514.1        0.0        0.0        0.0        0.0     1958.9      171.3     2923.7     7514.1       4.39      27.48      35.23      44.58
 CCl4             2049.0     2955.2        0.0     2955.2      34.42     1873.9      148.4     2721.4     7157.1        0.0        0.0        0.0        0.0     1873.9      148.4     2721.4     7157.1       4.39      26.53      34.19      43.60
 CCl4             2050.0     2770.2        0.0     2770.2      33.43     1792.2      128.7     2532.8     6816.7        0.0        0.0        0.0        0.0     1792.2      128.7     2532.8     6816.7       4.38      25.61      33.18      42.64
 CCl4             2051.0        0.0        0.0        0.0      32.46        0.0        0.0        0.0        0.0        0.0        0.0        0.0        0.0        0.0        0.0        0.0        0.0       4.37      24.72      32.20      41.70
 CCl4             2052.0        0.0        0.0        0.0      31.42        0.0        0.0        0.0        0.0        0.0        0.0        0.0        0.0        0.0        0.0        0.0        0.0       4.40      23.66      31.15      40.78
 CCl4             2053.0        0.0        0.0        0.0      30.42        0.0        0.0        0.0        0.0        0.0        0.0        0.0        0.0        0.0        0.0        0.0        0.0       4.43      22.64      30.12      39.88
 CCl4             2054.0        0.0        0.0        0.0      29.44        0.0        0.0        0.0        0.0        0.0        0.0        0.0        0.0        0.0        0.0        0.0        0.0       4.45      21.67      29.14      38.99
 CCl4             2055.0        0.0        0.0        0.0      28.50        0.0        0.0        0.0        0.0        0.0        0.0        0.0        0.0        0.0        0.0        0.0        0.0       4.47      20.74      28.18      38.13
 CCl4             2056.0        0.0        0.0        0.0      27.59        0.0        0.0        0.0        0.0        0.0        0.0        0.0        0.0        0.0        0.0        0.0        0.0       4.48      19.85      27.26      37.28
 CCl4             2057.0        0.0        0.0        0.0      26.71        0.0        0.0        0.0        0.0        0.0        0.0        0.0        0.0        0.0        0.0        0.0        0.0       4.49      18.99      26.36      36.46
 CCl4             2058.0        0.0        0.0        0.0      25.86        0.0        0.0        0.0        0.0        0.0        0.0        0.0        0.0        0.0        0.0        0.0        0.0       4.49      18.17      25.50      35.65
 CCl4             2059.0        0.0        0.0        0.0      25.04        0.0        0.0        0.0        0.0        0.0        0.0        0.0        0.0        0.0        0.0        0.0        0.0       4.49      17.39      24.66      34.86
 CCl4             2060.0        0.0        0.0        0.0      24.24        0.0        0.0        0.0        0.0        0.0        0.0        0.0        0.0        0.0        0.0        0.0        0.0       4.49      16.63      23.85      34.09
 CCl4             2061.0        0.0        0.0        0.0      23.47        0.0        0.0        0.0        0.0        0.0        0.0        0.0        0.0        0.0        0.0        0.0        0.0       4.48      15.92      23.07      33.33
 CCl4             2062.0        0.0        0.0        0.0      22.72        0.0        0.0        0.0        0.0        0.0        0.0        0.0        0.0        0.0        0.0        0.0        0.0       4.47      15.23      22.31      32.59
 CCl4             2063.0        0.0        0.0        0.0      22.00        0.0        0.0        0.0        0.0        0.0        0.0        0.0        0.0        0.0        0.0        0.0        0.0       4.45      14.57      21.58      31.87
 CCl4             2064.0        0.0        0.0        0.0      21.31        0.0        0.0        0.0        0.0        0.0        0.0        0.0        0.0        0.0        0.0        0.0        0.0       4.43      13.94      20.87      31.16
 CCl4             2065.0        0.0        0.0        0.0      20.63        0.0        0.0        0.0        0.0        0.0        0.0        0.0        0.0        0.0        0.0        0.0        0.0       4.41      13.33      20.19      30.47
 CCl4             2066.0        0.0        0.0        0.0      19.98        0.0        0.0        0.0        0.0        0.0        0.0        0.0        0.0        0.0        0.0        0.0        0.0       4.39      12.76      19.53      29.80
 CCl4             2067.0        0.0        0.0        0.0      19.35        0.0        0.0        0.0        0.0        0.0        0.0        0.0        0.0        0.0        0.0        0.0        0.0       4.36      12.20      18.89      29.14
 CCl4             2068.0        0.0        0.0        0.0      18.74        0.0        0.0        0.0        0.0        0.0        0.0        0.0        0.0        0.0        0.0        0.0        0.0       4.33      11.68      18.26      28.49
 CCl4             2069.0        0.0        0.0        0.0      18.15        0.0        0.0        0.0        0.0        0.0        0.0        0.0        0.0        0.0        0.0        0.0        0.0       4.30      11.17      17.67      27.86
 CCl4             2070.0        0.0        0.0        0.0      17.57        0.0        0.0        0.0        0.0        0.0        0.0        0.0        0.0        0.0        0.0        0.0        0.0       4.27      10.69      17.09      27.25
 CCl4             2071.0        0.0        0.0        0.0      17.02        0.0        0.0        0.0        0.0        0.0        0.0        0.0        0.0        0.0        0.0        0.0        0.0       4.24      10.22      16.53      26.64
 CCl4             2072.0        0.0        0.0        0.0      16.49        0.0        0.0        0.0        0.0        0.0        0.0        0.0        0.0        0.0        0.0        0.0        0.0       4.20       9.78      15.98      26.06
 CCl4             2073.0        0.0        0.0        0.0      15.97        0.0        0.0        0.0        0.0        0.0        0.0        0.0        0.0        0.0        0.0        0.0        0.0       4.16       9.35      15.46      25.48
 CCl4             2074.0        0.0        0.0        0.0      15.47        0.0        0.0        0.0        0.0        0.0        0.0        0.0        0.0        0.0        0.0        0.0        0.0       4.12       8.95      14.95      24.92
 CCl4             2075.0        0.0        0.0        0.0      14.98        0.0        0.0        0.0        0.0        0.0        0.0        0.0        0.0        0.0        0.0        0.0        0.0       4.08       8.56      14.46      24.37
 CCl4             2076.0        0.0        0.0        0.0      14.51        0.0        0.0        0.0        0.0        0.0        0.0        0.0        0.0        0.0        0.0        0.0        0.0       4.04       8.19      13.99      23.83
 CCl4             2077.0        0.0        0.0        0.0      14.06        0.0        0.0        0.0        0.0        0.0        0.0        0.0        0.0        0.0        0.0        0.0        0.0       4.00       7.83      13.53      23.31
 CCl4             2078.0        0.0        0.0        0.0      13.62        0.0        0.0        0.0        0.0        0.0        0.0        0.0        0.0        0.0        0.0        0.0        0.0       3.96       7.49      13.09      22.79
 CCl4             2079.0        0.0        0.0        0.0      13.19        0.0        0.0        0.0        0.0        0.0        0.0        0.0        0.0        0.0        0.0        0.0        0.0       3.91       7.17      12.66      22.28
 CCl4             2080.0        0.0        0.0        0.0      12.78        0.0        0.0        0.0        0.0        0.0        0.0        0.0        0.0        0.0        0.0        0.0        0.0       3.87       6.86      12.25      21.79
 CCl4             2081.0        0.0        0.0        0.0      12.38        0.0        0.0        0.0        0.0        0.0        0.0        0.0        0.0        0.0        0.0        0.0        0.0       3.82       6.56      11.84      21.31
 CCl4             2082.0        0.0        0.0        0.0      12.00        0.0        0.0        0.0        0.0        0.0        0.0        0.0        0.0        0.0        0.0        0.0        0.0       3.78       6.28      11.45      20.84
 CCl4             2083.0        0.0        0.0        0.0      11.63        0.0        0.0        0.0        0.0        0.0        0.0        0.0        0.0        0.0        0.0        0.0        0.0       3.73       6.01      11.08      20.38
 CCl4             2084.0        0.0        0.0        0.0      11.26        0.0        0.0        0.0        0.0        0.0        0.0        0.0        0.0        0.0        0.0        0.0        0.0       3.68       5.74      10.72      19.93
 CCl4             2085.0        0.0        0.0        0.0      10.92        0.0        0.0        0.0        0.0        0.0        0.0        0.0        0.0        0.0        0.0        0.0        0.0       3.63       5.49      10.37      19.49
 CCl4             2086.0        0.0        0.0        0.0      10.58        0.0        0.0        0.0        0.0        0.0        0.0        0.0        0.0        0.0        0.0        0.0        0.0       3.59       5.25      10.03      19.07
 CCl4             2087.0        0.0        0.0        0.0      10.25        0.0        0.0        0.0        0.0        0.0        0.0        0.0        0.0        0.0        0.0        0.0        0.0       3.54       5.03       9.70      18.64
 CCl4             2088.0        0.0        0.0        0.0       9.93        0.0        0.0        0.0        0.0        0.0        0.0        0.0        0.0        0.0        0.0        0.0        0.0       3.49       4.81       9.38      18.23
 CCl4             2089.0        0.0        0.0        0.0       9.63        0.0        0.0        0.0        0.0        0.0        0.0        0.0        0.0        0.0        0.0        0.0        0.0       3.44       4.60       9.07      17.83
 CCl4             2090.0        0.0        0.0        0.0       9.33        0.0        0.0        0.0        0.0        0.0        0.0        0.0        0.0        0.0        0.0        0.0        0.0       3.39       4.40       8.77      17.44
 CCl4             2091.0        0.0        0.0        0.0       9.04        0.0        0.0        0.0        0.0        0.0        0.0        0.0        0.0        0.0        0.0        0.0        0.0       3.35       4.21       8.49      17.06
 CCl4             2092.0        0.0        0.0        0.0       8.76        0.0        0.0        0.0        0.0        0.0        0.0        0.0        0.0        0.0        0.0        0.0        0.0       3.30       4.03       8.21      16.68
 CCl4             2093.0        0.0        0.0        0.0       8.49        0.0        0.0        0.0        0.0        0.0        0.0        0.0        0.0        0.0        0.0        0.0        0.0       3.25       3.85       7.94      16.32
 CCl4             2094.0        0.0        0.0        0.0       8.23        0.0        0.0        0.0        0.0        0.0        0.0        0.0        0.0        0.0        0.0        0.0        0.0       3.20       3.69       7.68      15.96
 CCl4             2095.0        0.0        0.0        0.0       7.98        0.0        0.0        0.0        0.0        0.0        0.0        0.0        0.0        0.0        0.0        0.0        0.0       3.15       3.53       7.43      15.61
 CCl4             2096.0        0.0        0.0        0.0       7.73        0.0        0.0        0.0        0.0        0.0        0.0        0.0        0.0        0.0        0.0        0.0        0.0       3.11       3.37       7.18      15.26
 CCl4             2097.0        0.0        0.0        0.0       7.50        0.0        0.0        0.0        0.0        0.0        0.0        0.0        0.0        0.0        0.0        0.0        0.0       3.06       3.23       6.95      14.93
 CCl4             2098.0        0.0        0.0        0.0       7.27        0.0        0.0        0.0        0.0        0.0        0.0        0.0        0.0        0.0        0.0        0.0        0.0       3.01       3.09       6.72      14.60
 CCl4             2099.0        0.0        0.0        0.0       7.04        0.0        0.0        0.0        0.0        0.0        0.0        0.0        0.0        0.0        0.0        0.0        0.0       2.96       2.95       6.50      14.28
 CCl4             2100.0        0.0        0.0        0.0       6.83        0.0        0.0        0.0        0.0        0.0        0.0        0.0        0.0        0.0        0.0        0.0        0.0       2.92       2.83       6.29      13.96
 CCl4             2101.0        0.0        0.0        0.0       6.62        0.0        0.0        0.0        0.0        0.0        0.0        0.0        0.0        0.0        0.0        0.0        0.0       2.87       2.70       6.08      13.66
 CCl4             2102.0        0.0        0.0        0.0       6.42        0.0        0.0        0.0        0.0        0.0        0.0        0.0        0.0        0.0        0.0        0.0        0.0       2.82       2.58       5.88      13.36
 CCl4             2103.0        0.0        0.0        0.0       6.22        0.0        0.0        0.0        0.0        0.0        0.0        0.0        0.0        0.0        0.0        0.0        0.0       2.78       2.47       5.69      13.06
 CCl4             2104.0        0.0        0.0        0.0       6.03        0.0        0.0        0.0        0.0        0.0        0.0        0.0        0.0        0.0        0.0        0.0        0.0       2.73       2.37       5.50      12.77
 CCl4             2105.0        0.0        0.0        0.0       5.85        0.0        0.0        0.0        0.0        0.0        0.0        0.0        0.0        0.0        0.0        0.0        0.0       2.69       2.26       5.32      12.49
 CCl4             2106.0        0.0        0.0        0.0       5.67        0.0        0.0        0.0        0.0        0.0        0.0        0.0        0.0        0.0        0.0        0.0        0.0       2.64       2.16       5.15      12.21
 CCl4             2107.0        0.0        0.0        0.0       5.50        0.0        0.0        0.0        0.0        0.0        0.0        0.0        0.0        0.0        0.0        0.0        0.0       2.60       2.07       4.98      11.94
 CCl4             2108.0        0.0        0.0        0.0       5.33        0.0        0.0        0.0        0.0        0.0        0.0        0.0        0.0        0.0        0.0        0.0        0.0       2.56       1.98       4.81      11.68
 CCl4             2109.0        0.0        0.0        0.0       5.17        0.0        0.0        0.0        0.0        0.0        0.0        0.0        0.0        0.0        0.0        0.0        0.0       2.51       1.90       4.66      11.42
 CCl4             2110.0        0.0        0.0        0.0       5.02        0.0        0.0        0.0        0.0        0.0        0.0        0.0        0.0        0.0        0.0        0.0        0.0       2.47       1.81       4.50      11.17
 CCl4             2111.0        0.0        0.0        0.0       4.86        0.0        0.0        0.0        0.0        0.0        0.0        0.0        0.0        0.0        0.0        0.0        0.0       2.43       1.73       4.36      10.93
 CCl4             2112.0        0.0        0.0        0.0       4.72        0.0        0.0        0.0        0.0        0.0        0.0        0.0        0.0        0.0        0.0        0.0        0.0       2.39       1.66       4.21      10.69
 CCl4             2113.0        0.0        0.0        0.0       4.57        0.0        0.0        0.0        0.0        0.0        0.0        0.0        0.0        0.0        0.0        0.0        0.0       2.35       1.59       4.08      10.45
 CCl4             2114.0        0.0        0.0        0.0       4.44        0.0        0.0        0.0        0.0        0.0        0.0        0.0        0.0        0.0        0.0        0.0        0.0       2.31       1.52       3.94      10.22
 CCl4             2115.0        0.0        0.0        0.0       4.30        0.0        0.0        0.0        0.0        0.0        0.0        0.0        0.0        0.0        0.0        0.0        0.0       2.27       1.45       3.81      10.00
 CCl4             2116.0        0.0        0.0        0.0       4.17        0.0        0.0        0.0        0.0        0.0        0.0        0.0        0.0        0.0        0.0        0.0        0.0       2.23       1.39       3.69       9.78
 CCl4             2117.0        0.0        0.0        0.0       4.05        0.0        0.0        0.0        0.0        0.0        0.0        0.0        0.0        0.0        0.0        0.0        0.0       2.19       1.33       3.57       9.56
 CCl4             2118.0        0.0        0.0        0.0       3.93        0.0        0.0        0.0        0.0        0.0        0.0        0.0        0.0        0.0        0.0        0.0        0.0       2.15       1.27       3.45       9.35
 CCl4             2119.0        0.0        0.0        0.0       3.81        0.0        0.0        0.0        0.0        0.0        0.0        0.0        0.0        0.0        0.0        0.0        0.0       2.11       1.22       3.34       9.14
 CCl4             2120.0        0.0        0.0        0.0       3.70        0.0        0.0        0.0        0.0        0.0        0.0        0.0        0.0        0.0        0.0        0.0        0.0       2.07       1.16       3.23       8.94
 
 Species            Year  Prod_mean  Bank_mean  Emis_mean   Mix_mean  Prod_stdv  Prod_2.5p   Prod_50p Prod_97.5p  Bank_stdv  Bank_2.5p   Bank_50p Bank_97.5p  Emis_stdv  Emis_2.5p   Emis_50p Emis_97.5p   Mix_stdv   Mix_2.5p    Mix_50p  Mix_97.5p
 CH3CCl3          1950.0        0.0        0.0        0.0       0.00        0.0        0.0        0.0        0.0        0.0        0.0        0.0        0.0        0.0        0.0        0.0        0.0       0.00       0.00       0.00       0.00
 CH3CCl3          1951.0        0.0        0.0        0.0       0.00        0.0        0.0        0.0        0.0        0.0        0.0        0.0        0.0        0.0        0.0        0.0        0.0       0.00       0.00       0.00       0.00
 CH3CCl3          1952.0        0.0        0.0        0.0       0.00        0.0        0.0        0.0        0.0        0.0        0.0        0.0        0.0        0.0        0.0        0.0        0.0       0.00       0.00       0.00       0.00
 CH3CCl3          1953.0        0.0        0.0        0.0       0.00        0.0        0.0        0.0        0.0        0.0        0.0        0.0        0.0        0.0        0.0        0.0        0.0       0.00       0.00       0.00       0.00
 CH3CCl3          1954.0     1214.6        0.0     1220.7       0.00       60.7     1095.6     1214.6     1333.6        0.0        0.0        0.0        0.0       36.9     1151.5     1219.6     1296.0       0.00       0.00       0.00       0.00
 CH3CCl3          1955.0     3513.3        0.0     3538.7       0.05      175.6     3169.0     3513.3     3857.5        0.0        0.0        0.0        0.0      107.7     3336.6     3535.6     3758.6       0.00       0.05       0.05       0.05
 CH3CCl3          1956.0     6226.3        0.0     6287.8       0.19      311.1     5616.3     6226.3     6836.3        0.0        0.0        0.0        0.0      193.5     5924.0     6282.0     6683.0       0.00       0.19       0.19       0.19
 CH3CCl3          1957.0     9473.3        0.0     9587.9       0.41      473.4     8545.2     9473.3    10401.5        0.0        0.0        0.0        0.0      298.8     9025.8     9579.3    10198.1       0.00       0.41       0.41       0.41
 CH3CCl3          1958.0    10776.8        0.0    10950.2       0.73      538.6     9721.0    10776.8    11832.6        0.0        0.0        0.0        0.0      351.1    10289.0    10940.3    11668.5       0.00       0.73       0.73       0.73
 CH3CCl3          1959.0    14723.2        0.0    14967.8       1.04      735.8    13280.8    14723.2    16165.7        0.0        0.0        0.0        0.0      481.9    14060.0    14954.4    15953.4       0.00       1.04       1.04       1.04
 CH3CCl3          1960.0    18355.6        0.0    18687.5       1.46      917.3    16557.3    18355.6    20154.0        0.0        0.0        0.0        0.0      609.1    17539.1    18670.7    19932.7       0.00       1.46       1.46       1.46
 CH3CCl3          1961.0    20084.8        0.0    20507.0       1.95     1003.7    18117.1    20084.8    22052.6        0.0        0.0        0.0        0.0      686.3    19211.1    20488.9    21907.5       0.00       1.95       1.95       1.95
 CH3CCl3          1962.0    28231.4        0.0    28772.3       2.43     1410.8    25465.5    28231.5    30997.4        0.0        0.0        0.0        0.0      946.6    26986.6    28746.5    30705.3       0.00       2.43       2.43       2.43
 CH3CCl3          1963.0    31472.8        0.0    32149.8       3.15     1572.8    28389.3    31472.8    34556.3        0.0        0.0        0.0        0.0     1081.0    30108.6    32121.2    34355.2       0.00       3.15       3.15       3.15
 CH3CCl3          1964.0    36211.7        0.0    37032.3       3.88     1809.6    32664.0    36211.7    39759.6        0.0        0.0        0.0        0.0     1259.3    34652.1    36999.4    39600.6       0.00       3.88       3.88       3.88
 CH3CCl3          1965.0    48115.9        0.0    49126.3       4.67     2404.5    43401.8    48115.9    52830.0        0.0        0.0        0.0        0.0     1643.9    46021.8    49083.0    52481.2       0.00       4.67       4.67       4.67
 CH3CCl3          1966.0    69595.0        0.0    70899.9       5.81     3477.9    62776.6    69595.0    76413.5        0.0        0.0        0.0        0.0     2324.2    66517.0    70836.2    75644.6       0.00       5.81       5.81       5.81
 CH3CCl3          1967.0    94175.4        0.0    95902.8       7.63     4706.3    84948.8    94175.5   103402.3        0.0        0.0        0.0        0.0     3132.7    89996.6    95816.6   102304.4       0.00       7.63       7.63       7.63
 CH3CCl3          1968.0   114813.5        0.0   117056.9      10.14     5737.6   103565.0   114813.6   126062.3        0.0        0.0        0.0        0.0     3864.5   109765.4   116951.8   124950.6       0.00      10.14      10.14      10.14
 CH3CCl3          1969.0   134929.2        0.0   137751.9      13.04     6742.9   121709.8   134929.2   148148.8        0.0        0.0        0.0        0.0     4606.1   129053.1   137630.5   147152.0       0.00      13.04      13.04      13.04
 CH3CCl3          1970.0   141383.7        0.0   144768.9      16.25     7065.4   127532.0   141383.8   155235.8        0.0        0.0        0.0        0.0     4986.3   135341.1   144640.8   154929.8       0.00      16.25      16.25      16.25
 CH3CCl3          1971.0   170202.2        0.0   174207.8      19.14     8505.6   153527.1   170202.3   186877.8        0.0        0.0        0.0        0.0     5975.6   162908.7   174053.2   186383.6       0.00      19.14      19.14      19.14
 CH3CCl3          1972.0   214254.5        0.0   219066.2      22.70    10707.0   193263.5   214254.7   235246.1        0.0        0.0        0.0        0.0     7434.3   205017.6   218873.7   234227.5       0.00      22.70      22.70      22.70
 CH3CCl3          1973.0   266316.4        0.0   272167.7      27.43    13308.7   240224.8   266316.5   292408.7        0.0        0.0        0.0        0.0     9192.6   254799.8   271926.9   290918.0       0.00      27.43      27.43      27.43
 CH3CCl3          1974.0   305613.1        0.0   312654.6      33.45    15272.5   275671.5   305613.3   335555.5        0.0        0.0        0.0        0.0    10671.7   292478.7   312377.1   334412.4       0.00      33.45      33.45      33.45
 CH3CCl3          1975.0   309117.3        0.0   317259.7      40.00    15447.6   278832.3   309117.4   339403.0        0.0        0.0        0.0        0.0    11203.0   296045.7   316979.3   340067.1       0.00      40.00      40.00      40.00
 CH3CCl3          1976.0   382454.4        0.0   391870.3      45.52    19112.5   344984.4   382454.6   419925.3        0.0        0.0        0.0        0.0    13591.1   366146.0   391523.2   419529.1       0.00      45.52      45.52      45.52
 CH3CCl3          1977.0   462299.3        0.0   473356.6      53.05    23102.7   417006.7   462299.5   507593.0        0.0        0.0        0.0        0.0    16300.0   442538.7   472938.0   506572.2       0.00      53.05      53.05      53.05
 CH3CCl3          1978.0   558367.5        0.0   571465.2      62.52    27903.5   503662.9   558367.8   613073.5        0.0        0.0        0.0        0.0    19587.0   534426.2   570957.5   611373.7       0.00      62.52      62.52      62.52
 CH3CCl3          1979.0   504137.6        0.0   518905.3      74.24    25193.5   454746.1   504137.9   553530.4        0.0        0.0        0.0        0.0    18917.3   483030.7   518442.4   557345.4       0.00      74.24      74.24      74.24
 CH3CCl3          1980.0   521240.3        0.0   537308.7      81.60    26048.1   470173.2   521240.6   572308.8        0.0        0.0        0.0        0.0    19924.2   499488.0   536829.0   577753.4       0.00      81.60      81.60      81.60
 CH3CCl3          1981.0   501963.7        0.0   519049.5      88.33    25084.8   452785.1   501963.9   551143.5        0.0        0.0        0.0        0.0    19957.3   481105.6   518613.4   559455.8       0.00      88.33      88.33      88.33
 CH3CCl3          1982.0   510131.0        0.0   528036.6      93.04    25493.0   460152.3   510131.2   560111.0        0.0        0.0        0.0        0.0    20550.4   488967.4   527596.9   569610.6       0.00      93.04      93.04      93.04
 CH3CCl3          1983.0   534154.1        0.0   552872.1      97.24    26693.5   481821.8   534154.3   586487.8        0.0        0.0        0.0        0.0    21502.8   511989.4   552409.4   596374.1       0.00      97.24      97.24      97.24
 CH3CCl3          1984.0   554854.3        0.0   574406.7     101.66    27727.9   500493.9   554854.6   609216.1        0.0        0.0        0.0        0.0    22390.6   531839.6   573932.6   619708.5       0.00     101.66     101.66     101.66
 CH3CCl3          1985.0   558716.3        0.0   579028.3     106.14    27920.9   503977.5   558716.5   613456.4        0.0        0.0        0.0        0.0    22861.5   535542.5   578553.5   625264.1       0.00     106.14     106.14     106.14
 CH3CCl3          1986.0   538470.9        0.0   559315.9     109.97    26909.2   485715.7   538471.2   591227.6        0.0        0.0        0.0        0.0    22690.0   516145.4   558874.9   605157.8       0.00     109.97     109.97     109.97
 CH3CCl3          1987.0   631306.5        0.0   652990.0     112.27    31548.5   569455.9   631306.8   693158.7        0.0        0.0        0.0        0.0    25195.8   605091.9   652441.6   704011.3       0.00     112.27     112.27     112.27
 CH3CCl3          1988.0   626290.8        0.0   648894.0     117.98    31297.9   564931.6   626291.0   687651.5        0.0        0.0        0.0        0.0    25542.4   600323.4   648362.5   700546.1       0.00     117.98     117.98     117.98
 CH3CCl3          1989.0   651887.6        0.0   675357.0     122.45    32577.0   588020.7   651887.9   715756.3        0.0        0.0        0.0        0.0    26556.9   624855.3   674806.0   729066.6       0.00     122.45     122.45     122.45
 CH3CCl3          1990.0   627649.8        0.0   651779.1     127.17    31365.8   566157.4   627650.0   689143.7        0.0        0.0        0.0        0.0    26359.8   601625.1   651263.1   705028.3       0.00     127.17     127.17     127.17
 CH3CCl3          1991.0   604021.6        0.0   628507.5     130.03    30185.0   544844.2   604021.9   663200.6        0.0        0.0        0.0        0.0    26039.4   578906.7   628002.7   681111.0       0.00     130.03     130.03     130.03
 CH3CCl3          1992.0   545910.6        0.0   570335.5     131.40    27281.0   492426.4   545910.8   599396.1        0.0        0.0        0.0        0.0    24798.2   523025.9   569879.5   620374.9       0.00     131.40     131.40     131.40
 CH3CCl3          1993.0   363163.3        0.0   386473.6     130.12    18148.5   327583.4   363163.5   398744.3        0.0        0.0        0.0        0.0    20770.5   346614.4   386154.6   428134.0       0.00     130.12     130.12     130.12
 CH3CCl3          1994.0   260731.8        0.0   282115.3     121.52    13029.6   235187.3   260731.9   286277.0        0.0        0.0        0.0        0.0    17975.0   247549.1   281889.4   318004.3       0.00     121.52     121.52     121.52
 CH3CCl3          1995.0   181703.7        0.0   200833.8     110.26     9080.3   163901.8   181703.8   199506.1        0.0        0.0        0.0        0.0    15446.2   170979.4   200684.0   231612.3       0.00     110.26     110.26     110.26
 CH3CCl3          1996.0    81245.8        0.0    97815.1      97.77     4060.1    73285.9    81245.8    89205.8        0.0        0.0        0.0        0.0    12716.3    73141.6    97740.7   123013.5       0.00      97.77      97.77      97.77
 CH3CCl3          1997.0    56485.9        0.0    70556.9      83.41     2822.8    50951.8    56485.9    62020.1        0.0        0.0        0.0        0.0    10727.4    49721.0    70511.8    91770.3       0.00      83.41      83.41      83.41
 CH3CCl3          1998.0    36800.3        0.0    48659.7      70.62     1839.0    33194.9    36800.4    40405.8        0.0        0.0        0.0        0.0     8990.8    31189.3    48632.2    66442.1       0.00      70.62      70.62      70.62
 CH3CCl3          1999.0    26289.4        0.0    36231.4      59.34     1313.8    23713.7    26289.4    28865.1        0.0        0.0        0.0        0.0     7519.4    21612.4    36206.1    51090.7       0.00      59.34      59.34      59.34
 CH3CCl3          2000.0    22811.2        0.0    31136.7      49.67     1140.0    20576.3    22811.2    25046.1        0.0        0.0        0.0        0.0     6299.8    18888.1    31116.4    43587.8       0.00      49.67      49.67      49.67
 CH3CCl3          2001.0    13955.2        0.0    20903.9      41.61      697.4    12588.0    13955.2    15322.5        0.0        0.0        0.0        0.0     5241.3    10705.0    20889.0    31250.6       0.00      41.61      41.61      41.61
 CH3CCl3          2002.0    12231.5        0.0    18019.9      34.64      611.3    11033.2    12231.5    13429.9        0.0        0.0        0.0        0.0     4367.9     9522.9    18007.6    26644.3       0.00      34.64      34.64      34.64
 CH3CCl3          2003.0    12337.9        0.0    17172.3      28.87      616.6    11129.1    12337.9    13546.7        0.0        0.0        0.0        0.0     3654.7    10065.1    17160.3    24392.9       0.00      28.87      28.87      28.87
 CH3CCl3          2004.0     7670.1        0.0    11700.2      24.14      383.3     6918.7     7670.1     8421.6        0.0        0.0        0.0        0.0     3038.6     5787.5    11691.3    17695.8       0.00      24.14      24.14      24.14
 CH3CCl3          2005.0     6974.2        0.0    10329.5      20.08      348.5     6290.9     6974.2     7657.5        0.0        0.0        0.0        0.0     2531.6     5403.6    10322.2    15327.0       0.00      20.08      20.08      20.08
 CH3CCl3          2006.0     9342.4        0.0    12155.2      16.73      466.9     8427.1     9342.4    10257.8        0.0        0.0        0.0        0.0     2135.0     8007.2    12147.6    16376.6       0.00      16.73      16.73      16.73
 CH3CCl3          2007.0     4624.8        0.0     6976.4      14.08      231.1     4171.7     4624.8     5077.9        0.0        0.0        0.0        0.0     1773.5     3525.3     6971.4    10477.1       0.00      14.08      14.08      14.08
 CH3CCl3          2008.0     5907.8        0.0     7875.4      11.72      295.2     5329.0     5907.8     6486.6        0.0        0.0        0.0        0.0     1490.7     4978.3     7870.5    10824.5       0.00      11.72      11.72      11.72
 CH3CCl3          2009.0     6903.9        0.0     6903.9       9.84      345.0     6227.5     6903.9     7580.3        0.0        0.0        0.0        0.0      345.0     6227.5     6903.9     7580.3       0.00       9.84       9.84       9.84
 CH3CCl3          2010.0     6903.9        0.0     6903.9       8.27      345.0     6227.5     6903.9     7580.3        0.0        0.0        0.0        0.0      345.0     6227.5     6903.9     7580.3       0.05       8.17       8.27       8.38
 CH3CCl3          2011.0     6903.9        0.0     6903.9       7.00      345.0     6227.5     6903.9     7580.3        0.0        0.0        0.0        0.0      345.0     6227.5     6903.9     7580.3       0.09       6.83       7.00       7.18
 CH3CCl3          2012.0     6903.9        0.0     6903.9       5.97      345.0     6227.5     6903.9     7580.3        0.0        0.0        0.0        0.0      345.0     6227.5     6903.9     7580.3       0.11       5.75       5.97       6.19
 CH3CCl3          2013.0     6903.9        0.0     6903.9       5.13      345.0     6227.5     6903.9     7580.3        0.0        0.0        0.0        0.0      345.0     6227.5     6903.9     7580.3       0.13       4.89       5.13       5.38
 CH3CCl3          2014.0     6903.9        0.0     6903.9       4.45      345.0     6227.5     6903.9     7580.3        0.0        0.0        0.0        0.0      345.0     6227.5     6903.9     7580.3       0.13       4.20       4.45       4.72
 CH3CCl3          2015.0        0.0        0.0        0.0       3.90        0.0        0.0        0.0        0.0        0.0        0.0        0.0        0.0        0.0        0.0        0.0        0.0       0.14       3.64       3.90       4.17
 CH3CCl3          2016.0        0.0        0.0        0.0       3.17        0.0        0.0        0.0        0.0        0.0        0.0        0.0        0.0        0.0        0.0        0.0        0.0       0.13       2.92       3.16       3.43
 CH3CCl3          2017.0        0.0        0.0        0.0       2.57        0.0        0.0        0.0        0.0        0.0        0.0        0.0        0.0        0.0        0.0        0.0        0.0       0.12       2.34       2.57       2.81
 CH3CCl3          2018.0        0.0        0.0        0.0       2.09        0.0        0.0        0.0        0.0        0.0        0.0        0.0        0.0        0.0        0.0        0.0        0.0       0.11       1.88       2.09       2.31
 CH3CCl3          2019.0        0.0        0.0        0.0       1.70        0.0        0.0        0.0        0.0        0.0        0.0        0.0        0.0        0.0        0.0        0.0        0.0       0.10       1.51       1.69       1.90
 CH3CCl3          2020.0        0.0        0.0        0.0       1.38        0.0        0.0        0.0        0.0        0.0        0.0        0.0        0.0        0.0        0.0        0.0        0.0       0.09       1.21       1.37       1.56
 CH3CCl3          2021.0        0.0        0.0        0.0       1.12        0.0        0.0        0.0        0.0        0.0        0.0        0.0        0.0        0.0        0.0        0.0        0.0       0.08       0.97       1.12       1.28
 CH3CCl3          2022.0        0.0        0.0        0.0       0.91        0.0        0.0        0.0        0.0        0.0        0.0        0.0        0.0        0.0        0.0        0.0        0.0       0.07       0.78       0.91       1.05
 CH3CCl3          2023.0        0.0        0.0        0.0       0.74        0.0        0.0        0.0        0.0        0.0        0.0        0.0        0.0        0.0        0.0        0.0        0.0       0.06       0.63       0.74       0.87
 CH3CCl3          2024.0        0.0        0.0        0.0       0.60        0.0        0.0        0.0        0.0        0.0        0.0        0.0        0.0        0.0        0.0        0.0        0.0       0.05       0.50       0.60       0.71
 CH3CCl3          2025.0        0.0        0.0        0.0       0.49        0.0        0.0        0.0        0.0        0.0        0.0        0.0        0.0        0.0        0.0        0.0        0.0       0.05       0.40       0.49       0.58
 CH3CCl3          2026.0        0.0        0.0        0.0       0.40        0.0        0.0        0.0        0.0        0.0        0.0        0.0        0.0        0.0        0.0        0.0        0.0       0.04       0.32       0.39       0.48
 CH3CCl3          2027.0        0.0        0.0        0.0       0.32        0.0        0.0        0.0        0.0        0.0        0.0        0.0        0.0        0.0        0.0        0.0        0.0       0.03       0.26       0.32       0.39
 CH3CCl3          2028.0        0.0        0.0        0.0       0.26        0.0        0.0        0.0        0.0        0.0        0.0        0.0        0.0        0.0        0.0        0.0        0.0       0.03       0.21       0.26       0.32
 CH3CCl3          2029.0        0.0        0.0        0.0       0.21        0.0        0.0        0.0        0.0        0.0        0.0        0.0        0.0        0.0        0.0        0.0        0.0       0.03       0.17       0.21       0.27
 CH3CCl3          2030.0        0.0        0.0        0.0       0.17        0.0        0.0        0.0        0.0        0.0        0.0        0.0        0.0        0.0        0.0        0.0        0.0       0.02       0.13       0.17       0.22
 CH3CCl3          2031.0        0.0        0.0        0.0       0.14        0.0        0.0        0.0        0.0        0.0        0.0        0.0        0.0        0.0        0.0        0.0        0.0       0.02       0.11       0.14       0.18
 CH3CCl3          2032.0        0.0        0.0        0.0       0.11        0.0        0.0        0.0        0.0        0.0        0.0        0.0        0.0        0.0        0.0        0.0        0.0       0.02       0.09       0.11       0.15
 CH3CCl3          2033.0        0.0        0.0        0.0       0.09        0.0        0.0        0.0        0.0        0.0        0.0        0.0        0.0        0.0        0.0        0.0        0.0       0.01       0.07       0.09       0.12
 CH3CCl3          2034.0        0.0        0.0        0.0       0.08        0.0        0.0        0.0        0.0        0.0        0.0        0.0        0.0        0.0        0.0        0.0        0.0       0.01       0.06       0.07       0.10
 CH3CCl3          2035.0        0.0        0.0        0.0       0.06        0.0        0.0        0.0        0.0        0.0        0.0        0.0        0.0        0.0        0.0        0.0        0.0       0.01       0.04       0.06       0.08
 CH3CCl3          2036.0        0.0        0.0        0.0       0.05        0.0        0.0        0.0        0.0        0.0        0.0        0.0        0.0        0.0        0.0        0.0        0.0       0.01       0.04       0.05       0.07
 CH3CCl3          2037.0        0.0        0.0        0.0       0.04        0.0        0.0        0.0        0.0        0.0        0.0        0.0        0.0        0.0        0.0        0.0        0.0       0.01       0.03       0.04       0.06
 CH3CCl3          2038.0        0.0        0.0        0.0       0.03        0.0        0.0        0.0        0.0        0.0        0.0        0.0        0.0        0.0        0.0        0.0        0.0       0.01       0.02       0.03       0.05
 CH3CCl3          2039.0        0.0        0.0        0.0       0.03        0.0        0.0        0.0        0.0        0.0        0.0        0.0        0.0        0.0        0.0        0.0        0.0       0.00       0.02       0.03       0.04
 CH3CCl3          2040.0        0.0        0.0        0.0       0.02        0.0        0.0        0.0        0.0        0.0        0.0        0.0        0.0        0.0        0.0        0.0        0.0       0.00       0.01       0.02       0.03
 CH3CCl3          2041.0        0.0        0.0        0.0       0.02        0.0        0.0        0.0        0.0        0.0        0.0        0.0        0.0        0.0        0.0        0.0        0.0       0.00       0.01       0.02       0.03
 CH3CCl3          2042.0        0.0        0.0        0.0       0.01        0.0        0.0        0.0        0.0        0.0        0.0        0.0        0.0        0.0        0.0        0.0        0.0       0.00       0.01       0.01       0.02
 CH3CCl3          2043.0        0.0        0.0        0.0       0.01        0.0        0.0        0.0        0.0        0.0        0.0        0.0        0.0        0.0        0.0        0.0        0.0       0.00       0.01       0.01       0.02
 CH3CCl3          2044.0        0.0        0.0        0.0       0.01        0.0        0.0        0.0        0.0        0.0        0.0        0.0        0.0        0.0        0.0        0.0        0.0       0.00       0.01       0.01       0.01
 CH3CCl3          2045.0        0.0        0.0        0.0       0.01        0.0        0.0        0.0        0.0        0.0        0.0        0.0        0.0        0.0        0.0        0.0        0.0       0.00       0.00       0.01       0.01
 CH3CCl3          2046.0        0.0        0.0        0.0       0.01        0.0        0.0        0.0        0.0        0.0        0.0        0.0        0.0        0.0        0.0        0.0        0.0       0.00       0.00       0.01       0.01
 CH3CCl3          2047.0        0.0        0.0        0.0       0.01        0.0        0.0        0.0        0.0        0.0        0.0        0.0        0.0        0.0        0.0        0.0        0.0       0.00       0.00       0.00       0.01
 CH3CCl3          2048.0        0.0        0.0        0.0       0.00        0.0        0.0        0.0        0.0        0.0        0.0        0.0        0.0        0.0        0.0        0.0        0.0       0.00       0.00       0.00       0.01
 CH3CCl3          2049.0        0.0        0.0        0.0       0.00        0.0        0.0        0.0        0.0        0.0        0.0        0.0        0.0        0.0        0.0        0.0        0.0       0.00       0.00       0.00       0.01
 CH3CCl3          2050.0        0.0        0.0        0.0       0.00        0.0        0.0        0.0        0.0        0.0        0.0        0.0        0.0        0.0        0.0        0.0        0.0       0.00       0.00       0.00       0.00
 CH3CCl3          2051.0        0.0        0.0        0.0       0.00        0.0        0.0        0.0        0.0        0.0        0.0        0.0        0.0        0.0        0.0        0.0        0.0       0.00       0.00       0.00       0.00
 CH3CCl3          2052.0        0.0        0.0        0.0       0.00        0.0        0.0        0.0        0.0        0.0        0.0        0.0        0.0        0.0        0.0        0.0        0.0       0.00       0.00       0.00       0.00
 CH3CCl3          2053.0        0.0        0.0        0.0       0.00        0.0        0.0        0.0        0.0        0.0        0.0        0.0        0.0        0.0        0.0        0.0        0.0       0.00       0.00       0.00       0.00
 CH3CCl3          2054.0        0.0        0.0        0.0       0.00        0.0        0.0        0.0        0.0        0.0        0.0        0.0        0.0        0.0        0.0        0.0        0.0       0.00       0.00       0.00       0.00
 CH3CCl3          2055.0        0.0        0.0        0.0       0.00        0.0        0.0        0.0        0.0        0.0        0.0        0.0        0.0        0.0        0.0        0.0        0.0       0.00       0.00       0.00       0.00
 CH3CCl3          2056.0        0.0        0.0        0.0       0.00        0.0        0.0        0.0        0.0        0.0        0.0        0.0        0.0        0.0        0.0        0.0        0.0       0.00       0.00       0.00       0.00
 CH3CCl3          2057.0        0.0        0.0        0.0       0.00        0.0        0.0        0.0        0.0        0.0        0.0        0.0        0.0        0.0        0.0        0.0        0.0       0.00       0.00       0.00       0.00
 CH3CCl3          2058.0        0.0        0.0        0.0       0.00        0.0        0.0        0.0        0.0        0.0        0.0        0.0        0.0        0.0        0.0        0.0        0.0       0.00       0.00       0.00       0.00
 CH3CCl3          2059.0        0.0        0.0        0.0       0.00        0.0        0.0        0.0        0.0        0.0        0.0        0.0        0.0        0.0        0.0        0.0        0.0       0.00       0.00       0.00       0.00
 CH3CCl3          2060.0        0.0        0.0        0.0       0.00        0.0        0.0        0.0        0.0        0.0        0.0        0.0        0.0        0.0        0.0        0.0        0.0       0.00       0.00       0.00       0.00
 CH3CCl3          2061.0        0.0        0.0        0.0       0.00        0.0        0.0        0.0        0.0        0.0        0.0        0.0        0.0        0.0        0.0        0.0        0.0       0.00       0.00       0.00       0.00
 CH3CCl3          2062.0        0.0        0.0        0.0       0.00        0.0        0.0        0.0        0.0        0.0        0.0        0.0        0.0        0.0        0.0        0.0        0.0       0.00       0.00       0.00       0.00
 CH3CCl3          2063.0        0.0        0.0        0.0       0.00        0.0        0.0        0.0        0.0        0.0        0.0        0.0        0.0        0.0        0.0        0.0        0.0       0.00       0.00       0.00       0.00
 CH3CCl3          2064.0        0.0        0.0        0.0       0.00        0.0        0.0        0.0        0.0        0.0        0.0        0.0        0.0        0.0        0.0        0.0        0.0       0.00       0.00       0.00       0.00
 CH3CCl3          2065.0        0.0        0.0        0.0       0.00        0.0        0.0        0.0        0.0        0.0        0.0        0.0        0.0        0.0        0.0        0.0        0.0       0.00       0.00       0.00       0.00
 CH3CCl3          2066.0        0.0        0.0        0.0       0.00        0.0        0.0        0.0        0.0        0.0        0.0        0.0        0.0        0.0        0.0        0.0        0.0       0.00       0.00       0.00       0.00
 CH3CCl3          2067.0        0.0        0.0        0.0       0.00        0.0        0.0        0.0        0.0        0.0        0.0        0.0        0.0        0.0        0.0        0.0        0.0       0.00       0.00       0.00       0.00
 CH3CCl3          2068.0        0.0        0.0        0.0       0.00        0.0        0.0        0.0        0.0        0.0        0.0        0.0        0.0        0.0        0.0        0.0        0.0       0.00       0.00       0.00       0.00
 CH3CCl3          2069.0        0.0        0.0        0.0       0.00        0.0        0.0        0.0        0.0        0.0        0.0        0.0        0.0        0.0        0.0        0.0        0.0       0.00       0.00       0.00       0.00
 CH3CCl3          2070.0        0.0        0.0        0.0       0.00        0.0        0.0        0.0        0.0        0.0        0.0        0.0        0.0        0.0        0.0        0.0        0.0       0.00       0.00       0.00       0.00
 CH3CCl3          2071.0        0.0        0.0        0.0       0.00        0.0        0.0        0.0        0.0        0.0        0.0        0.0        0.0        0.0        0.0        0.0        0.0       0.00       0.00       0.00       0.00
 CH3CCl3          2072.0        0.0        0.0        0.0       0.00        0.0        0.0        0.0        0.0        0.0        0.0        0.0        0.0        0.0        0.0        0.0        0.0       0.00       0.00       0.00       0.00
 CH3CCl3          2073.0        0.0        0.0        0.0       0.00        0.0        0.0        0.0        0.0        0.0        0.0        0.0        0.0        0.0        0.0        0.0        0.0       0.00       0.00       0.00       0.00
 CH3CCl3          2074.0        0.0        0.0        0.0       0.00        0.0        0.0        0.0        0.0        0.0        0.0        0.0        0.0        0.0        0.0        0.0        0.0       0.00       0.00       0.00       0.00
 CH3CCl3          2075.0        0.0        0.0        0.0       0.00        0.0        0.0        0.0        0.0        0.0        0.0        0.0        0.0        0.0        0.0        0.0        0.0       0.00       0.00       0.00       0.00
 CH3CCl3          2076.0        0.0        0.0        0.0       0.00        0.0        0.0        0.0        0.0        0.0        0.0        0.0        0.0        0.0        0.0        0.0        0.0       0.00       0.00       0.00       0.00
 CH3CCl3          2077.0        0.0        0.0        0.0       0.00        0.0        0.0        0.0        0.0        0.0        0.0        0.0        0.0        0.0        0.0        0.0        0.0       0.00       0.00       0.00       0.00
 CH3CCl3          2078.0        0.0        0.0        0.0       0.00        0.0        0.0        0.0        0.0        0.0        0.0        0.0        0.0        0.0        0.0        0.0        0.0       0.00       0.00       0.00       0.00
 CH3CCl3          2079.0        0.0        0.0        0.0       0.00        0.0        0.0        0.0        0.0        0.0        0.0        0.0        0.0        0.0        0.0        0.0        0.0       0.00       0.00       0.00       0.00
 CH3CCl3          2080.0        0.0        0.0        0.0       0.00        0.0        0.0        0.0        0.0        0.0        0.0        0.0        0.0        0.0        0.0        0.0        0.0       0.00       0.00       0.00       0.00
 CH3CCl3          2081.0        0.0        0.0        0.0       0.00        0.0        0.0        0.0        0.0        0.0        0.0        0.0        0.0        0.0        0.0        0.0        0.0       0.00       0.00       0.00       0.00
 CH3CCl3          2082.0        0.0        0.0        0.0       0.00        0.0        0.0        0.0        0.0        0.0        0.0        0.0        0.0        0.0        0.0        0.0        0.0       0.00       0.00       0.00       0.00
 CH3CCl3          2083.0        0.0        0.0        0.0       0.00        0.0        0.0        0.0        0.0        0.0        0.0        0.0        0.0        0.0        0.0        0.0        0.0       0.00       0.00       0.00       0.00
 CH3CCl3          2084.0        0.0        0.0        0.0       0.00        0.0        0.0        0.0        0.0        0.0        0.0        0.0        0.0        0.0        0.0        0.0        0.0       0.00       0.00       0.00       0.00
 CH3CCl3          2085.0        0.0        0.0        0.0       0.00        0.0        0.0        0.0        0.0        0.0        0.0        0.0        0.0        0.0        0.0        0.0        0.0       0.00       0.00       0.00       0.00
 CH3CCl3          2086.0        0.0        0.0        0.0       0.00        0.0        0.0        0.0        0.0        0.0        0.0        0.0        0.0        0.0        0.0        0.0        0.0       0.00       0.00       0.00       0.00
 CH3CCl3          2087.0        0.0        0.0        0.0       0.00        0.0        0.0        0.0        0.0        0.0        0.0        0.0        0.0        0.0        0.0        0.0        0.0       0.00       0.00       0.00       0.00
 CH3CCl3          2088.0        0.0        0.0        0.0       0.00        0.0        0.0        0.0        0.0        0.0        0.0        0.0        0.0        0.0        0.0        0.0        0.0       0.00       0.00       0.00       0.00
 CH3CCl3          2089.0        0.0        0.0        0.0       0.00        0.0        0.0        0.0        0.0        0.0        0.0        0.0        0.0        0.0        0.0        0.0        0.0       0.00       0.00       0.00       0.00
 CH3CCl3          2090.0        0.0        0.0        0.0       0.00        0.0        0.0        0.0        0.0        0.0        0.0        0.0        0.0        0.0        0.0        0.0        0.0       0.00       0.00       0.00       0.00
 CH3CCl3          2091.0        0.0        0.0        0.0       0.00        0.0        0.0        0.0        0.0        0.0        0.0        0.0        0.0        0.0        0.0        0.0        0.0       0.00       0.00       0.00       0.00
 CH3CCl3          2092.0        0.0        0.0        0.0       0.00        0.0        0.0        0.0        0.0        0.0        0.0        0.0        0.0        0.0        0.0        0.0        0.0       0.00       0.00       0.00       0.00
 CH3CCl3          2093.0        0.0        0.0        0.0       0.00        0.0        0.0        0.0        0.0        0.0        0.0        0.0        0.0        0.0        0.0        0.0        0.0       0.00       0.00       0.00       0.00
 CH3CCl3          2094.0        0.0        0.0        0.0       0.00        0.0        0.0        0.0        0.0        0.0        0.0        0.0        0.0        0.0        0.0        0.0        0.0       0.00       0.00       0.00       0.00
 CH3CCl3          2095.0        0.0        0.0        0.0       0.00        0.0        0.0        0.0        0.0        0.0        0.0        0.0        0.0        0.0        0.0        0.0        0.0       0.00       0.00       0.00       0.00
 CH3CCl3          2096.0        0.0        0.0        0.0       0.00        0.0        0.0        0.0        0.0        0.0        0.0        0.0        0.0        0.0        0.0        0.0        0.0       0.00       0.00       0.00       0.00
 CH3CCl3          2097.0        0.0        0.0        0.0       0.00        0.0        0.0        0.0        0.0        0.0        0.0        0.0        0.0        0.0        0.0        0.0        0.0       0.00       0.00       0.00       0.00
 CH3CCl3          2098.0        0.0        0.0        0.0       0.00        0.0        0.0        0.0        0.0        0.0        0.0        0.0        0.0        0.0        0.0        0.0        0.0       0.00       0.00       0.00       0.00
 CH3CCl3          2099.0        0.0        0.0        0.0       0.00        0.0        0.0        0.0        0.0        0.0        0.0        0.0        0.0        0.0        0.0        0.0        0.0       0.00       0.00       0.00       0.00
 CH3CCl3          2100.0        0.0        0.0        0.0       0.00        0.0        0.0        0.0        0.0        0.0        0.0        0.0        0.0        0.0        0.0        0.0        0.0       0.00       0.00       0.00       0.00
 CH3CCl3          2101.0        0.0        0.0        0.0       0.00        0.0        0.0        0.0        0.0        0.0        0.0        0.0        0.0        0.0        0.0        0.0        0.0       0.00       0.00       0.00       0.00
 CH3CCl3          2102.0        0.0        0.0        0.0       0.00        0.0        0.0        0.0        0.0        0.0        0.0        0.0        0.0        0.0        0.0        0.0        0.0       0.00       0.00       0.00       0.00
 CH3CCl3          2103.0        0.0        0.0        0.0       0.00        0.0        0.0        0.0        0.0        0.0        0.0        0.0        0.0        0.0        0.0        0.0        0.0       0.00       0.00       0.00       0.00
 CH3CCl3          2104.0        0.0        0.0        0.0       0.00        0.0        0.0        0.0        0.0        0.0        0.0        0.0        0.0        0.0        0.0        0.0        0.0       0.00       0.00       0.00       0.00
 CH3CCl3          2105.0        0.0        0.0        0.0       0.00        0.0        0.0        0.0        0.0        0.0        0.0        0.0        0.0        0.0        0.0        0.0        0.0       0.00       0.00       0.00       0.00
 CH3CCl3          2106.0        0.0        0.0        0.0       0.00        0.0        0.0        0.0        0.0        0.0        0.0        0.0        0.0        0.0        0.0        0.0        0.0       0.00       0.00       0.00       0.00
 CH3CCl3          2107.0        0.0        0.0        0.0       0.00        0.0        0.0        0.0        0.0        0.0        0.0        0.0        0.0        0.0        0.0        0.0        0.0       0.00       0.00       0.00       0.00
 CH3CCl3          2108.0        0.0        0.0        0.0       0.00        0.0        0.0        0.0        0.0        0.0        0.0        0.0        0.0        0.0        0.0        0.0        0.0       0.00       0.00       0.00       0.00
 CH3CCl3          2109.0        0.0        0.0        0.0       0.00        0.0        0.0        0.0        0.0        0.0        0.0        0.0        0.0        0.0        0.0        0.0        0.0       0.00       0.00       0.00       0.00
 CH3CCl3          2110.0        0.0        0.0        0.0       0.00        0.0        0.0        0.0        0.0        0.0        0.0        0.0        0.0        0.0        0.0        0.0        0.0       0.00       0.00       0.00       0.00
 CH3CCl3          2111.0        0.0        0.0        0.0       0.00        0.0        0.0        0.0        0.0        0.0        0.0        0.0        0.0        0.0        0.0        0.0        0.0       0.00       0.00       0.00       0.00
 CH3CCl3          2112.0        0.0        0.0        0.0       0.00        0.0        0.0        0.0        0.0        0.0        0.0        0.0        0.0        0.0        0.0        0.0        0.0       0.00       0.00       0.00       0.00
 CH3CCl3          2113.0        0.0        0.0        0.0       0.00        0.0        0.0        0.0        0.0        0.0        0.0        0.0        0.0        0.0        0.0        0.0        0.0       0.00       0.00       0.00       0.00
 CH3CCl3          2114.0        0.0        0.0        0.0       0.00        0.0        0.0        0.0        0.0        0.0        0.0        0.0        0.0        0.0        0.0        0.0        0.0       0.00       0.00       0.00       0.00
 CH3CCl3          2115.0        0.0        0.0        0.0       0.00        0.0        0.0        0.0        0.0        0.0        0.0        0.0        0.0        0.0        0.0        0.0        0.0       0.00       0.00       0.00       0.00
 CH3CCl3          2116.0        0.0        0.0        0.0       0.00        0.0        0.0        0.0        0.0        0.0        0.0        0.0        0.0        0.0        0.0        0.0        0.0       0.00       0.00       0.00       0.00
 CH3CCl3          2117.0        0.0        0.0        0.0       0.00        0.0        0.0        0.0        0.0        0.0        0.0        0.0        0.0        0.0        0.0        0.0        0.0       0.00       0.00       0.00       0.00
 CH3CCl3          2118.0        0.0        0.0        0.0       0.00        0.0        0.0        0.0        0.0        0.0        0.0        0.0        0.0        0.0        0.0        0.0        0.0       0.00       0.00       0.00       0.00
 CH3CCl3          2119.0        0.0        0.0        0.0       0.00        0.0        0.0        0.0        0.0        0.0        0.0        0.0        0.0        0.0        0.0        0.0        0.0       0.00       0.00       0.00       0.00
 CH3CCl3          2120.0        0.0        0.0        0.0       0.00        0.0        0.0        0.0        0.0        0.0        0.0        0.0        0.0        0.0        0.0        0.0        0.0       0.00       0.00       0.00       0.00
 
 Species            Year  Prod_mean  Bank_mean  Emis_mean   Mix_mean  Prod_stdv  Prod_2.5p   Prod_50p Prod_97.5p  Bank_stdv  Bank_2.5p   Bank_50p Bank_97.5p  Emis_stdv  Emis_2.5p   Emis_50p Emis_97.5p   Mix_stdv   Mix_2.5p    Mix_50p  Mix_97.5p
 HCFC-22          1950.0      771.1  -171288.6     1966.7       0.89       38.5      695.6      771.1      846.7   809667.6 -1745883.0  -175180.7  1427000.1      184.6     1609.7     1965.0     2334.2       0.00       0.89       0.89       0.89
 HCFC-22          1951.0      997.9  -172484.1      729.9       0.95       49.9      900.1      997.9     1095.7   809494.7 -1746697.4  -176376.1  1425471.3      179.3      380.2      729.1     1084.1       0.00       0.95       0.95       0.95
 HCFC-22          1952.0     1587.6  -172216.2     1044.6       0.92       79.3     1432.0     1587.6     1743.1   809322.7 -1746059.1  -176086.8  1425362.4      177.9      698.1     1043.5     1396.9       0.00       0.92       0.92       0.92
 HCFC-22          1953.0     2177.2  -171673.2     1438.4       0.92      108.8     1963.9     2177.2     2390.6   809135.5 -1745113.5  -175549.7  1425490.3      182.2     1084.2     1437.0     1800.1       0.00       0.92       0.92       0.92
 HCFC-22          1954.0     2903.0  -170934.3     1906.3       0.94      145.1     2618.6     2903.0     3187.4   808928.5 -1743929.4  -174829.1  1425766.1      193.0     1532.1     1904.6     2290.3       0.00       0.94       0.94       0.94
 HCFC-22          1955.0     3719.5  -169937.6     2976.4       1.00      185.9     3355.1     3719.5     4083.9   808693.6 -1742495.6  -173807.0  1426233.0      220.0     2551.8     2974.0     3416.2       0.00       1.00       1.00       1.00
 HCFC-22          1956.0     6078.1  -169194.5     3483.0       1.12      303.7     5482.7     6078.1     6673.6   808416.5 -1741180.1  -173065.3  1426345.1      249.3     3002.2     3480.1     3981.7       0.00       1.12       1.12       1.12
 HCFC-22          1957.0     6304.9  -166599.3     4255.1       1.26      315.1     5687.2     6304.9     6922.7   808054.8 -1737853.9  -170408.3  1428289.0      287.7     3700.7     4251.6     4830.9       0.00       1.26       1.26       1.26
 HCFC-22          1958.0     7575.0  -164549.5     6013.7       1.45      378.5     6832.9     7575.0     8317.1   807656.5 -1734913.5  -168351.2  1429601.0      352.9     5335.8     6008.6     6722.3       0.00       1.45       1.45       1.45
 HCFC-22          1959.0    11249.1  -162988.2     7066.6       1.74      562.2    10147.0    11249.1    12351.2   807176.7 -1732643.8  -166742.7  1430180.3      420.2     6259.2     7060.5     7910.3       0.00       1.74       1.74       1.74
 HCFC-22          1960.0    12156.3  -158805.6     7665.5       2.08      607.5    10965.3    12156.3    13347.3   806547.2 -1727167.5  -162516.2  1433298.0      486.0     6730.0     7659.1     8639.6       0.00       2.08       2.08       2.08
 HCFC-22          1961.0    12156.3  -154314.9     9433.9       2.43      607.5    10965.3    12156.3    13347.3   805838.4 -1721316.5  -158014.5  1436409.4      577.6     8323.1     9425.8    10593.0       0.00       2.43       2.43       2.43
 HCFC-22          1962.0    15422.1  -151592.5    11583.7       2.87      770.7    13911.2    15422.1    16933.1   805056.9 -1717024.0  -155223.8  1437533.4      691.7    10254.3    11574.0    12972.9       0.00       2.87       2.87       2.87
 HCFC-22          1963.0    17554.0  -147754.2    14409.3       3.42      877.2    15834.2    17554.0    19273.9   804100.7 -1711276.9  -151339.5  1439531.5      837.2    12801.5    14397.2    16090.5       0.00       3.42       3.42       3.42
 HCFC-22          1964.0    22362.1  -144609.5    16796.7       4.12     1117.5    20171.3    22362.1    24553.0   802974.8 -1706125.0  -148215.7  1440535.8      996.4    14882.3    16782.3    18797.7       0.00       4.12       4.12       4.12
 HCFC-22          1965.0    25083.7  -139044.1    20532.5       4.92     1253.5    22626.2    25083.7    27541.2   801594.9 -1697533.4  -142610.4  1443655.8     1200.3    18226.8    20515.2    22943.0       0.00       4.92       4.92       4.92
 HCFC-22          1966.0    31524.7  -134492.9    24534.2       5.91     1575.4    28436.2    31524.7    34613.3   799982.8 -1689801.3  -138114.0  1445046.3     1439.2    21769.3    24513.4    27424.3       0.00       5.91       5.91       5.91
 HCFC-22          1967.0    37330.7  -127502.4    29844.1       7.09     1865.5    33673.3    37330.7    40988.1   798012.8 -1678879.6  -131168.3  1448516.4     1735.3    26511.4    29819.1    33329.0       0.00       7.09       7.09       7.09
 HCFC-22          1968.0    46000.0  -120015.8    36248.6       8.53     2298.8    41493.3    46000.0    50506.8   795657.8 -1666510.3  -123619.4  1451150.6     2095.6    32225.3    36217.9    40456.9       0.00       8.53       8.53       8.53
 HCFC-22          1969.0    56100.0  -110264.4    39416.0      10.29     2803.5    50603.8    56100.0    61596.4   792793.3 -1651187.9  -113806.2  1455067.9     2438.3    34724.3    39382.4    44306.6       0.00      10.29      10.29      10.29
 HCFC-22          1970.0    56071.0   -93580.4    43690.8      12.12     2802.1    50577.7    56071.0    61564.5   789379.0 -1627832.3   -97130.2  1465032.9     2817.4    38264.4    43653.8    49336.2       0.00      12.12      12.12      12.12
 HCFC-22          1971.0    60582.0   -81200.2    47788.6      14.10     3027.5    54646.7    60582.0    66517.5   785648.9 -1608209.3   -84726.0  1470013.0     3217.2    41590.3    47750.1    54227.5       0.00      14.10      14.10      14.10
 HCFC-22          1972.0    63250.0   -68406.8    54839.6      16.19     3160.8    57053.3    63250.0    69446.9   781469.1 -1587478.4   -72095.6  1474661.0     3693.9    47723.2    54795.4    62231.3       0.00      16.19      16.19      16.19
 HCFC-22          1973.0    74346.0   -59996.4    61967.6      18.59     3715.3    67062.3    74346.0    81630.0   776832.4 -1570561.4   -63564.5  1474123.8     4222.2    53833.1    61917.4    70413.5       0.00      18.59      18.59      18.59
 HCFC-22          1974.0    83390.0   -47618.0    62598.6      21.28     4167.3    75220.2    83390.0    91560.1   771480.7 -1547940.3   -51092.8  1476215.1     4677.7    53569.0    62548.2    71953.8       0.00      21.28      21.28      21.28
 HCFC-22          1975.0    74989.0   -26826.6    70549.8      23.79     3747.5    67642.3    74989.0    82336.0   765506.6 -1515719.8   -30207.3  1485817.4     5240.7    60435.0    70492.4    81029.3       0.00      23.79      23.79      23.79
 HCFC-22          1976.0    90706.0   -22387.5    78580.0      26.65     4532.9    81819.5    90706.0    99592.9   759282.6 -1498805.9   -25728.3  1477803.3     5860.9    67267.0    78516.7    90301.3       0.00      26.65      26.65      26.65
 HCFC-22          1977.0   101375.0   -10261.4    85866.2      29.81     5066.1    91443.2   101375.0   111307.2   752153.5 -1472850.5   -13482.8  1476168.5     6519.9    73275.0    85796.9    98907.8       0.00      29.81      29.81      29.81
 HCFC-22          1978.0   111662.0     5247.4   115807.2      33.21     5580.1   100722.4   111662.0   122602.1   744211.8 -1441774.3     2056.6  1476105.1     7641.1   101088.7   115710.2   131105.5       0.00      33.21      33.21      33.21
 HCFC-22          1979.0   117892.0     1102.2   106960.2      38.36     5891.5   106342.0   117892.0   129442.4   735153.6 -1428205.0    -1983.4  1453719.5     8326.8    90867.2   106873.5   123601.8       0.00      38.36      38.36      38.36
 HCFC-22          1980.0   126323.0    12034.0   111438.5      42.50     6312.8   113947.0   126323.1   138699.5   725309.2 -1397604.5     8995.5  1445058.9     9102.5    93857.6   111349.1   129599.1       0.00      42.50      42.50      42.50
 HCFC-22          1981.0   130811.0    26918.5   116447.8      46.60     6537.1   117995.3   130811.1   143627.2   714606.3 -1361478.3    23786.8  1438814.1     9885.1    97347.9   116354.0   136150.4       0.00      46.60      46.60      46.60
 HCFC-22          1982.0   123616.0    41281.7   120569.4      50.72     6177.5   111505.2   123616.1   135727.3   703142.2 -1324914.8    38165.4  1430685.6    10656.5    99972.9   120470.3   141797.6       0.00      50.72      50.72      50.72
 HCFC-22          1983.0   143881.0    44328.3   124058.3      54.79     7190.2   129784.9   143881.1   157977.7   691216.8 -1298911.4    41437.5  1410142.8    11410.9   101995.0   123953.8   146785.8       0.00      54.79      54.79      54.79
 HCFC-22          1984.0   152356.0    64151.0   128660.5      58.77     7613.7   137429.6   152356.1   167283.0   678169.4 -1254414.8    61268.3  1404262.8    12169.3   105119.9   128552.9   152878.1       0.00      58.77      58.77      58.77
 HCFC-22          1985.0   153432.0    87846.6   136713.3      62.74     7667.5   138400.1   153432.1   168464.5   664294.6 -1204024.0    85034.6  1400647.9    12981.1   111603.8   136595.8   162539.8       0.00      62.74      62.74      62.74
 HCFC-22          1986.0   164993.0   104565.3   146784.2      66.93     8245.3   148828.5   164993.1   181158.2   649737.6 -1159467.0   101560.0  1388599.5    13863.6   119966.3   146661.0   174376.0       0.00      66.93      66.93      66.93
 HCFC-22          1987.0   173304.0   122774.1   161858.0      71.47     8660.6   156325.3   173304.1   190283.4   634188.5 -1111620.0   119971.3  1376251.1    14884.8   133078.3   161721.6   191506.5       0.00      71.47      71.47      71.47
 HCFC-22          1988.0   203545.0   134220.1   177558.5      76.66    10171.8   183603.5   203545.1   223487.3   617624.2 -1067865.5   131548.6  1355523.9    16029.2   146575.5   177411.4   209484.9       0.00      76.66      76.66      76.66
 HCFC-22          1989.0   241062.0   160206.6   183182.2      82.49    12046.7   217445.0   241062.1   264680.0   599416.1 -1007104.4   157613.5  1346019.8    17122.5   150069.4   183024.4   217279.0       0.00      82.49      82.49      82.49
 HCFC-22          1990.0   225815.2   218086.4   185482.2      88.24    11284.7   203691.9   225815.3   247939.4   579433.2  -909661.9   215574.1  1364814.3    18151.4   150343.6   185318.7   221618.6       0.00      88.24      88.24      88.24
 HCFC-22          1991.0   210568.3   258419.4   191007.0      93.68    10522.8   189938.8   210568.4   231198.7   559024.5  -828821.4   256027.7  1364830.4    19179.9   153843.5   190830.0   229167.6       0.00      93.68      93.68      93.68
 HCFC-22          1992.0   195321.5   277980.8   189738.6      99.05     9760.9   176185.7   195321.6   214458.1   538203.8  -768734.9   275828.3  1342724.6    20097.3   150767.4   189555.1   229714.2       0.00      99.05      99.05      99.05
 HCFC-22          1993.0   275327.3   283563.7   201126.2     103.92    13759.0   248353.3   275327.4   302302.5   517077.6  -722258.3   281620.4  1306266.8    21114.7   160200.0   200930.3   243128.1       0.00     103.92     103.92     103.92
 HCFC-22          1994.0   262341.6   357764.8   196100.0     109.16    13110.1   236639.8   262341.8   288044.5   493305.4  -602503.3   355539.9  1332703.3    21957.8   153503.8   195911.8   239731.8       0.00     109.16     109.16     109.16
 HCFC-22          1995.0   328056.1   424006.5   220403.7     113.64    16394.1   295916.2   328056.3   360197.3   469297.0  -489354.4   421839.4  1351050.0    23097.3   175640.4   220192.3   266354.6       0.00     113.64     113.64     113.64
 HCFC-22          1996.0   273566.1   531658.9   212831.6     119.40    13671.0   246764.6   273566.2   300368.7   443004.2  -329797.6   529818.3  1405901.0    23994.8   166287.5   212632.8   260495.5       0.00     119.40     119.40     119.40
 HCFC-22          1997.0   264540.7   592393.4   214075.4     124.19    13220.0   238623.4   264540.8   290459.0   417498.2  -219633.8   590784.4  1416682.3    24854.0   165862.3   213879.3   263434.7       0.00     124.19     124.19     124.19
 HCFC-22          1998.0   289108.5   642858.7   241335.9     128.69    14447.7   260784.3   289108.6   317433.8   391800.2  -119604.2   641672.5  1416338.9    26033.5   190848.0   241101.1   293105.8       0.00     128.69     128.69     128.69
 HCFC-22          1999.0   321431.8   690631.2   231220.7     134.66    16063.0   289940.8   321431.9   352924.0   364985.7   -20648.9   689443.1  1411133.0    26935.0   178968.6   231011.5   284715.8       0.00     134.66     134.66     134.66
 HCFC-22          2000.0   341748.6   780842.3   242722.2     139.47    17078.3   308267.3   341748.8   375231.4   337246.2   123417.6   779531.4  1446801.6    27943.0   188514.2   242501.7   298213.4       0.00     139.47     139.47     139.47
 HCFC-22          2001.0   321925.3   879868.7   264664.2     144.67    16087.7   290386.0   321925.4   353465.9   309000.2   277791.6   878951.3  1488765.1    29169.6   208080.1   264412.5   322642.6       0.00     144.67     144.67     144.67
 HCFC-22          2002.0   319464.7   937129.8   246048.9     150.93    15964.7   288166.5   319464.8   350764.1   281258.4   389370.3   936196.6  1491549.5    30008.0   187763.5   245811.3   305624.2       0.00     150.93     150.93     150.93
 HCFC-22          2003.0   334848.8  1010545.5   257006.1     155.44    16733.5   302043.3   334848.9   367655.5   254324.6   515168.3  1009544.4  1511923.5    30954.1   196902.0   256767.8   318474.4       0.00     155.44     155.44     155.44
 HCFC-22          2004.0   370902.3  1088388.2   267544.5     160.32    18535.2   334564.7   370902.5   407241.4   228389.1   643232.5  1087695.5  1538446.3    31961.2   205497.0   267305.2   331028.0       0.00     160.32     160.32     160.32
 HCFC-22          2005.0   432062.1  1191746.0   295578.4     165.53    21591.6   389732.6   432062.3   474393.3   204076.5   793366.9  1191457.5  1593768.8    33271.8   231034.8   295299.8   361670.8       0.00     165.53     165.53     165.53
 HCFC-22          2006.0   430268.8  1328229.7   309452.1     172.21    21502.0   388115.0   430268.9   472424.3   182669.7   971577.6  1327937.8  1686893.9    34642.0   242251.4   309154.6   378287.9       0.00     172.21     172.21     172.21
 HCFC-22          2007.0   501387.4  1449046.3   332368.7     179.29    25056.0   452266.1   501387.6   550510.7   167679.1  1120763.6  1449196.6  1779287.3    36213.5   262128.4   332045.1   404379.9       0.00     179.29     179.29     179.29
 HCFC-22          2008.0   448030.0  1618065.0   339024.9     187.34    22389.6   404136.2   448030.2   491925.6   161720.3  1301014.8  1618066.3  1935118.0    37720.8   265845.2   338692.5   413984.4       0.00     187.34     187.34     187.34
 HCFC-22          2009.0   523630.4  1727070.2   449595.0     195.20    26167.6   472329.9   523630.6   574933.0   167401.7  1398371.3  1727141.4  2054812.8    98008.2   329749.4   437037.8   638514.6       0.00     195.20     195.20     195.20
 HCFC-22          2010.0   506851.6  1801105.5   457042.5     209.95    25329.1   457194.9   506851.8   556510.3   205502.4  1397610.3  1806868.4  2179802.3    67117.4   351342.5   450245.1   608105.4       7.87     199.72     208.89     226.14
 HCFC-22          2011.0   535885.0  1850914.6   470650.8     224.07    26780.0   483383.9   535885.3   588388.2   242369.0  1362340.6  1860883.8  2285750.3    57854.1   373461.8   466575.0   596687.1      13.01     205.24     222.38     253.14
 HCFC-22          2012.0   564918.5  1916148.9   487868.9     238.01    28230.9   509573.0   564918.8   620266.3   276993.7  1350380.3  1928463.3  2407032.8    52984.8   395829.2   485354.3   598905.1      17.36     211.67     235.87     277.68
 HCFC-22          2013.0   492334.9  1993198.5   487204.7     252.04    24603.6   444100.4   492335.1   540571.3   309420.4  1360086.0  2006716.3  2539830.3    46111.9   404733.2   486316.9   577066.9      21.21     219.00     249.56     300.69
 HCFC-22          2014.0   492334.9  1998328.6   487073.7     264.94    24603.6   444100.4   492335.1   540571.3   336258.9  1313555.3  2011270.4  2594159.8    41458.4   412074.0   487116.5   563856.0      24.43     226.15     262.25     320.92
 HCFC-22          2015.0   398227.4  2003589.8   468201.3     276.82    19900.8   359212.7   398227.6   437243.6   358918.7  1280202.4  2015079.8  2641914.5    34779.2   405049.2   469061.7   528802.1      27.23     232.98     273.95     338.99
 HCFC-22          2016.0   398227.4  1933615.9   453549.2     286.52    19900.8   359212.7   398227.6   437243.6   374803.2  1187874.4  1942534.6  2601933.5    30642.3   398606.2   454542.1   505478.4      29.47     238.53     283.56     353.44
 HCFC-22          2017.0   398227.4  1878294.1   442071.9     294.47    19900.8   359212.7   398227.6   437243.6   386278.6  1123379.6  1884108.0  2569513.5    28029.4   392787.4   442975.2   489016.5      31.39     242.89     291.45     365.14
 HCFC-22          2018.0   398227.4  1834449.7   433044.5     301.04    19900.8   359212.7   398227.6   437243.6   394964.4  1078170.8  1836983.0  2541634.0    26350.1   387563.1   433831.0   476822.7      33.10     246.26     297.98     375.08
 HCFC-22          2019.0   398227.4  1799632.5   425921.0     306.51    19900.8   359212.7   398227.6   437243.6   401940.9  1046241.5  1799110.6  2517952.8    25250.9   382892.0   426613.5   467726.6      34.68     248.84     303.36     383.71
 HCFC-22          2020.0   263476.4  1771938.8   393057.0     311.08    13166.8   237663.4   263476.6   289290.5   407937.7  1023624.9  1768546.8  2498024.5    22417.8   356108.3   393627.6   429652.8      36.17     250.74     307.86     391.34
 HCFC-22          2021.0   263476.4  1642358.2   367187.6     313.08    13166.8   237663.4   263476.6   289290.5   408680.8   910167.0  1635846.9  2366930.8    20980.0   332343.6   367747.8   401417.0      37.30     250.62     309.83     395.46
 HCFC-22          2022.0   263476.4  1538647.1   346674.9     313.21    13166.8   237663.4   263476.6   289290.5   406424.2   830454.8  1529061.8  2254383.3    20024.4   312958.9   347214.0   379568.3      38.25     249.00     309.92     397.47
 HCFC-22          2023.0   263476.4  1455448.6   330354.0     311.95    13166.8   237663.4   263476.6   289290.5   402864.7   774385.9  1443052.8  2158083.5    19196.4   297930.3   330790.3   362239.5      39.10     246.18     308.62     397.87
 HCFC-22          2024.0   263476.4  1388571.1   317332.0     309.72    13166.8   237663.4   263476.6   289290.5   399039.2   735204.0  1373786.5  2075172.9    18412.7   286514.4   317661.8   348198.4      39.89     242.62     306.33     397.25
 HCFC-22          2025.0   132635.7  1334715.5   280479.9     306.80     6628.3   119641.3   132635.8   145630.6   395570.1   707483.5  1317986.5  2004074.5    19562.4   245317.0   281309.9   312788.2      40.63     238.47     303.31     396.07
 HCFC-22          2026.0   132635.7  1186871.3   251354.5     301.63     6628.3   119641.3   132635.8   145630.6   388656.2   593058.2  1167969.5  1832774.1    19862.0   213470.9   252298.3   284803.3      41.11     232.41     298.10     392.01
 HCFC-22          2027.0   132635.7  1068152.5   228183.4     294.93     6628.3   119641.3   132635.8   145630.6   380101.4   512849.3  1047237.6  1685537.5    19458.1   190430.4   228979.8   261953.5      41.47     225.10     291.34     385.97
 HCFC-22          2028.0   132635.7   972604.8   209690.1     287.21     6628.3   119641.3   132635.8   145630.6   371335.9   456383.0   949980.3  1559513.4    18547.3   173992.4   210201.9   242932.8      41.73     217.00     283.59     378.92
 HCFC-22          2029.0   132635.7   895550.4   194891.0     278.87     6628.3   119641.3   132635.8   145630.6   363173.0   416821.3   871612.1  1451496.4    17341.2   162279.4   195085.2   226883.5      41.92     208.48     275.18     371.24
 HCFC-22          2030.0    10064.7   833295.1   158254.4     270.20      503.0     9078.6    10064.7    11050.8   356040.2   388980.1   808477.3  1358234.4    20387.2   117889.5   159033.1   194765.0      42.05     199.77     266.41     363.09
 HCFC-22          2031.0    10064.7   685105.4   129249.1     259.76      503.0     9078.6    10064.7    11050.8   346871.9   280630.8   659223.4  1175206.9    21239.6    86004.4   130047.8   167866.6      41.97     189.68     255.92     352.63
 HCFC-22          2032.0    10064.7   565921.0   106139.5     248.20      503.0     9078.6    10064.7    11050.8   337026.1   204383.0   539043.6  1017820.9    20918.6    63422.9   106693.2   145141.3      41.78     178.58     244.28     340.93
 HCFC-22          2033.0    10064.7   469846.2    87669.4     236.00      503.0     9078.6    10064.7    11050.8   327590.6   150774.3   442311.9   883080.8    19893.3    47539.8    87896.6   125829.4      41.49     167.07     232.00     328.36
 HCFC-22          2034.0    10064.7   392241.4    72869.1     223.53      503.0     9078.6    10064.7    11050.8   319120.6   113177.7   364351.6   767181.6    18478.2    36453.7    72753.2   109324.0      41.12     155.50     219.48     315.60
 HCFC-22          2035.0    10064.7   329437.0    60981.9     211.06      503.0     9078.6    10064.7    11050.8   311842.4    86694.9   301563.6   667604.3    16880.7    28659.2    60557.5    95178.0      40.66     144.03     206.91     302.52
 HCFC-22          2036.0    10064.7   278519.8    51414.3     198.78      503.0     9078.6    10064.7    11050.8   305784.2    68155.5   250958.6   582288.8    15234.9    23204.7    50726.1    83106.7      40.12     132.96     194.54     289.32
 HCFC-22          2037.0    10064.7   237170.2    43698.5     186.82      503.0     9078.6    10064.7    11050.8   300863.5    55160.0   210213.6   508847.4    13624.6    19381.9    42807.9    72749.8      39.50     122.44     182.51     276.36
 HCFC-22          2038.0    10064.7   203536.4    37464.7     175.30      503.0     9078.6    10064.7    11050.8   296944.5    46073.9   177390.2   445799.8    12099.9    16699.4    36433.4    63879.7      38.81     112.45     170.93     263.71
 HCFC-22          2039.0    10064.7   176136.4    32419.3     164.27      503.0     9078.6    10064.7    11050.8   293873.9    39696.6   150962.3   391458.9    10688.4    14825.4    31296.8    56227.8      38.04     103.10     159.81     251.38
 HCFC-22          2040.0        0.0   153781.7    26295.4     153.77        0.0        0.0        0.0        0.0   291502.3    35197.2   129676.3   344842.5     9807.9    10383.3    25206.0    48273.1      37.22      94.40     149.25     239.47
 HCFC-22          2041.0        0.0   127486.3    21376.0     143.68        0.0        0.0        0.0        0.0   289552.7    24680.2   104435.5   296226.7     8867.5     7277.5    20301.9    41462.0      36.33      86.21     139.10     227.79
 HCFC-22          2042.0        0.0   106110.2    17408.6     134.06        0.0        0.0        0.0        0.0   287969.6    17302.3    84125.9   254548.3     7944.1     5092.1    16348.5    35602.1      35.40      78.53     129.46     216.39
 HCFC-22          2043.0        0.0    88701.7    14201.4     124.93        0.0        0.0        0.0        0.0   286700.3    12128.1    67759.0   218659.3     7070.6     3566.2    13167.5    30581.0      34.43      71.41     120.30     205.42
 HCFC-22          2044.0        0.0    74500.2    11603.7     116.31        0.0        0.0        0.0        0.0   285689.6     8512.4    54577.6   187846.7     6263.9     2497.2    10605.8    26269.8      33.42      64.81     111.64     194.85
 HCFC-22          2045.0        0.0    62896.5     9495.7     108.18        0.0        0.0        0.0        0.0   284886.5     5972.9    43954.0   161446.0     5531.1     1748.4     8539.8    22561.7      32.39      58.75     103.50     184.68
 HCFC-22          2046.0        0.0    53400.8     7782.1     100.55        0.0        0.0        0.0        0.0   284247.0     4190.6    35401.5   138683.8     4873.4     1222.8     6877.8    19380.6      31.35      53.22      95.86     174.92
 HCFC-22          2047.0        0.0    45618.7     6386.9      93.40        0.0        0.0        0.0        0.0   283734.7     2940.1    28516.0   119232.6     4288.8      856.0     5539.8    16648.2      30.30      48.13      88.72     165.63
 HCFC-22          2048.0        0.0    39231.8     5249.1      86.72        0.0        0.0        0.0        0.0   283320.4     2062.3    22968.0   102486.0     3772.9      598.9     4461.5    14301.3      29.24      43.52      82.06     156.76
 HCFC-22          2049.0        0.0    33982.7     4319.9      80.48        0.0        0.0        0.0        0.0   282981.0     1448.2    18498.9    88074.8     3320.4      419.0     3593.0    12285.2      28.19      39.30      75.85     148.28
 HCFC-22          2050.0        0.0    29662.8     3559.9      74.66        0.0        0.0        0.0        0.0   282698.7     1014.4    14903.6    75685.2     2925.5      293.1     2893.5    10558.1      27.14      35.47      70.08     140.28
 HCFC-22          2051.0        0.0    26102.9     2937.4      69.25        0.0        0.0        0.0        0.0   282459.8      711.3    12003.9    65059.3     2582.4      205.2     2330.3     9070.6      26.10      31.98      64.73     132.66
 HCFC-22          2052.0        0.0    23165.5     2427.0      64.21        0.0        0.0        0.0        0.0   282253.8      498.4     9668.7    55922.0     2285.6      143.5     1876.8     7795.4      25.08      28.83      59.75     125.38
 HCFC-22          2053.0        0.0    20738.5     2007.8      59.53        0.0        0.0        0.0        0.0   282073.1      349.3     7787.1    48065.6     2029.6      100.3     1511.7     6698.7      24.07      25.98      55.14     118.52
 HCFC-22          2054.0        0.0    18730.7     1663.1      55.19        0.0        0.0        0.0        0.0   281911.7      245.1     6272.5    41330.5     1809.7       70.2     1217.6     5752.5      23.09      23.40      50.86     111.97
 HCFC-22          2055.0        0.0    17067.6     1379.4      51.15        0.0        0.0        0.0        0.0   281765.2      171.8     5052.4    35533.1     1621.3       49.1      980.7     4941.5      22.13      21.07      46.90     105.83
 HCFC-22          2056.0        0.0    15688.3     1145.5      47.41        0.0        0.0        0.0        0.0   281630.6      120.4     4069.6    30553.3     1460.2       34.3      789.8     4246.2      21.19      18.96      43.24      99.97
 HCFC-22          2057.0        0.0    14542.8      952.5      43.94        0.0        0.0        0.0        0.0   281505.3       84.5     3277.6    26263.2     1322.9       24.0      636.1     3647.8      20.28      17.06      39.86      94.45
 HCFC-22          2058.0        0.0    13590.3      793.0      40.72        0.0        0.0        0.0        0.0   281387.5       59.2     2639.4    22579.6     1206.0       16.8      512.3     3134.8      19.40      15.34      36.74      89.21
 HCFC-22          2059.0        0.0    12797.3      661.1      37.74        0.0        0.0        0.0        0.0   281276.1       41.6     2125.8    19405.6     1106.5       11.8      412.6     2693.8      18.55      13.80      33.85      84.25
 HCFC-22          2060.0        0.0    12136.2      551.9      34.98        0.0        0.0        0.0        0.0   281170.0       29.1     1712.4    16687.9     1021.9        8.2      332.3     2315.2      17.72      12.40      31.19      79.59
 HCFC-22          2061.0        0.0    11584.3      461.4      32.42        0.0        0.0        0.0        0.0   281068.5       20.4     1378.9    14348.1      949.8        5.8      267.6     1988.9      16.93      11.15      28.74      75.18
 HCFC-22          2062.0        0.0    11122.9      386.2      30.05        0.0        0.0        0.0        0.0   280971.1       14.3     1110.7    12335.1      888.3        4.0      215.5     1708.8      16.16      10.02      26.47      71.02
 HCFC-22          2063.0        0.0    10736.6      323.8      27.86        0.0        0.0        0.0        0.0   280877.2       10.0      894.5    10608.1      835.5        2.8      173.6     1468.4      15.42       9.01      24.38      67.06
 HCFC-22          2064.0        0.0    10412.8      271.9      25.83        0.0        0.0        0.0        0.0   280786.7        7.0      720.5     9118.3      790.0        2.0      139.8     1261.6      14.71       8.09      22.45      63.35
 HCFC-22          2065.0        0.0    10140.9      228.7      23.95        0.0        0.0        0.0        0.0   280699.3        4.9      580.2     7837.7      750.6        1.4      112.6     1084.4      14.03       7.27      20.67      59.83
 HCFC-22          2066.0        0.0     9912.3      192.6      22.20        0.0        0.0        0.0        0.0   280614.7        3.5      467.3     6738.4      716.1        1.0       90.7      931.9      13.37       6.53      19.03      56.50
 HCFC-22          2067.0        0.0     9719.7      162.6      20.59        0.0        0.0        0.0        0.0   280532.8        2.4      376.5     5792.5      685.8        0.7       73.0      800.7      12.74       5.87      17.52      53.36
 HCFC-22          2068.0        0.0     9557.1      137.4      19.10        0.0        0.0        0.0        0.0   280453.5        1.7      303.3     4981.3      658.9        0.5       58.8      688.0      12.14       5.27      16.13      50.39
 HCFC-22          2069.0        0.0     9419.7      116.4      17.71        0.0        0.0        0.0        0.0   280376.5        1.2      244.3     4281.7      634.7        0.3       47.4      591.1      11.57       4.73      14.85      47.59
 HCFC-22          2070.0        0.0     9303.2       98.8      16.43        0.0        0.0        0.0        0.0   280301.9        0.8      196.8     3681.0      613.0        0.2       38.1      508.0      11.02       4.25      13.67      44.94
 HCFC-22          2071.0        0.0     9204.4       84.1      15.25        0.0        0.0        0.0        0.0   280229.5        0.6      158.4     3165.4      593.2        0.2       30.7      436.7      10.49       3.82      12.58      42.43
 HCFC-22          2072.0        0.0     9120.3       71.7      14.15        0.0        0.0        0.0        0.0   280159.3        0.4      127.6     2720.9      575.0        0.1       24.7      375.1       9.99       3.42      11.58      40.06
 HCFC-22          2073.0        0.0     9048.5       61.4      13.13        0.0        0.0        0.0        0.0   280091.0        0.3      102.8     2338.7      558.2        0.1       19.9      322.4       9.51       3.07      10.66      37.83
 HCFC-22          2074.0        0.0     8987.2       52.6      12.19        0.0        0.0        0.0        0.0   280024.8        0.2       82.8     2010.3      542.6        0.1       16.0      277.1       9.05       2.76       9.81      35.70
 HCFC-22          2075.0        0.0     8934.6       45.3      11.32        0.0        0.0        0.0        0.0   279960.4        0.1       66.7     1728.2      528.1        0.0       12.9      238.1       8.62       2.48       9.03      33.69
 HCFC-22          2076.0        0.0     8889.3       39.1      10.51        0.0        0.0        0.0        0.0   279897.8        0.1       53.7     1485.9      514.4        0.0       10.4      204.6       8.20       2.22       8.31      31.82
 HCFC-22          2077.0        0.0     8850.2       33.8       9.76        0.0        0.0        0.0        0.0   279836.9        0.1       43.3     1277.3      501.5        0.0        8.4      175.8       7.81       1.99       7.65      30.04
 HCFC-22          2078.0        0.0     8816.4       29.4       9.06        0.0        0.0        0.0        0.0   279777.7        0.0       34.8     1098.0      489.3        0.0        6.8      151.1       7.43       1.79       7.04      28.36
 HCFC-22          2079.0        0.0     8787.0       25.6       8.42        0.0        0.0        0.0        0.0   279720.1        0.0       28.1      944.1      477.7        0.0        5.4      129.8       7.07       1.60       6.48      26.76
 HCFC-22          2080.0        0.0     8761.4       22.5       7.82        0.0        0.0        0.0        0.0   279664.1        0.0       22.6      811.5      466.6        0.0        4.4      111.6       6.73       1.44       5.96      25.27
 HCFC-22          2081.0        0.0     8738.9       19.8       7.27        0.0        0.0        0.0        0.0   279609.5        0.0       18.2      697.7      456.1        0.0        3.5       95.9       6.40       1.29       5.49      23.86
 HCFC-22          2082.0        0.0     8719.1       17.5       6.75        0.0        0.0        0.0        0.0   279556.4        0.0       14.7      600.1      446.0        0.0        2.8       82.4       6.09       1.16       5.05      22.53
 HCFC-22          2083.0        0.0     8701.7       15.5       6.28        0.0        0.0        0.0        0.0   279504.7        0.0       11.8      515.7      436.4        0.0        2.3       70.8       5.80       1.04       4.64      21.27
 HCFC-22          2084.0        0.0     8686.2       13.8       5.84        0.0        0.0        0.0        0.0   279454.3        0.0        9.5      443.2      427.1        0.0        1.8       60.9       5.52       0.93       4.27      20.08
 HCFC-22          2085.0        0.0     8672.3       12.4       5.43        0.0        0.0        0.0        0.0   279405.1        0.0        7.7      381.1      418.2        0.0        1.5       52.3       5.26       0.83       3.93      18.96
 HCFC-22          2086.0        0.0     8659.9       11.2       5.05        0.0        0.0        0.0        0.0   279357.2        0.0        6.2      327.6      409.6        0.0        1.2       45.0       5.00       0.75       3.62      17.90
 HCFC-22          2087.0        0.0     8648.7       10.1       4.70        0.0        0.0        0.0        0.0   279310.4        0.0        5.0      281.8      401.4        0.0        1.0       38.6       4.76       0.67       3.33      16.91
 HCFC-22          2088.0        0.0     8638.6        9.2       4.37        0.0        0.0        0.0        0.0   279264.8        0.0        4.0      242.3      393.4        0.0        0.8       33.2       4.54       0.60       3.06      15.97
 HCFC-22          2089.0        0.0     8629.4        8.4       4.07        0.0        0.0        0.0        0.0   279220.3        0.0        3.2      208.2      385.7        0.0        0.6       28.5       4.32       0.54       2.82      15.08
 HCFC-22          2090.0        0.0     8620.9        7.8       3.78        0.0        0.0        0.0        0.0   279176.9        0.0        2.6      178.9      378.3        0.0        0.5       24.5       4.11       0.48       2.59      14.23
 HCFC-22          2091.0        0.0     8613.2        7.2       3.52        0.0        0.0        0.0        0.0   279134.4        0.0        2.1      153.8      371.2        0.0        0.4       21.1       3.92       0.43       2.39      13.43
 HCFC-22          2092.0        0.0     8606.0        6.7       3.28        0.0        0.0        0.0        0.0   279093.0        0.0        1.7      132.2      364.3        0.0        0.3       18.1       3.73       0.39       2.20      12.69
 HCFC-22          2093.0        0.0     8599.3        6.2       3.05        0.0        0.0        0.0        0.0   279052.5        0.0        1.4      113.7      357.6        0.0        0.3       15.6       3.56       0.35       2.02      11.98
 HCFC-22          2094.0        0.0     8593.1        5.8       2.84        0.0        0.0        0.0        0.0   279012.9        0.0        1.1       97.7      351.1        0.0        0.2       13.4       3.39       0.31       1.86      11.31
 HCFC-22          2095.0        0.0     8587.3        5.5       2.65        0.0        0.0        0.0        0.0   278974.2        0.0        0.9       84.0      344.8        0.0        0.2       11.5       3.23       0.28       1.71      10.67
 HCFC-22          2096.0        0.0     8581.8        5.2       2.47        0.0        0.0        0.0        0.0   278936.3        0.0        0.7       72.2      338.7        0.0        0.1        9.9       3.08       0.25       1.57      10.08
 HCFC-22          2097.0        0.0     8576.6        4.9       2.30        0.0        0.0        0.0        0.0   278899.3        0.0        0.6       62.0      332.8        0.0        0.1        8.5       2.94       0.23       1.45       9.52
 HCFC-22          2098.0        0.0     8571.7        4.7       2.14        0.0        0.0        0.0        0.0   278863.1        0.0        0.5       53.3      327.1        0.0        0.1        7.3       2.80       0.20       1.33       8.98
 HCFC-22          2099.0        0.0     8567.1        4.4       2.00        0.0        0.0        0.0        0.0   278827.6        0.0        0.4       45.9      321.6        0.0        0.1        6.3       2.67       0.18       1.23       8.48
 HCFC-22          2100.0        0.0     8562.6        4.3       1.86        0.0        0.0        0.0        0.0   278792.9        0.0        0.3       39.4      316.2        0.0        0.1        5.4       2.55       0.16       1.13       8.01
 HCFC-22          2101.0        0.0     8558.4        4.1       1.74        0.0        0.0        0.0        0.0   278758.9        0.0        0.2       33.9      310.9        0.0        0.0        4.6       2.43       0.15       1.04       7.56
 HCFC-22          2102.0        0.0     8554.3        3.9       1.62        0.0        0.0        0.0        0.0   278725.6        0.0        0.2       29.2      305.9        0.0        0.0        4.0       2.32       0.13       0.95       7.14
 HCFC-22          2103.0        0.0     8550.4        3.8       1.51        0.0        0.0        0.0        0.0   278692.9        0.0        0.2       25.1      300.9        0.0        0.0        3.4       2.22       0.12       0.88       6.74
 HCFC-22          2104.0        0.0     8546.6        3.6       1.41        0.0        0.0        0.0        0.0   278660.9        0.0        0.1       21.6      296.1        0.0        0.0        2.9       2.12       0.11       0.81       6.37
 HCFC-22          2105.0        0.0     8543.0        3.5       1.32        0.0        0.0        0.0        0.0   278629.6        0.0        0.1       18.5      291.5        0.0        0.0        2.5       2.03       0.09       0.74       6.01
 HCFC-22          2106.0        0.0     8539.4        3.4       1.23        0.0        0.0        0.0        0.0   278598.8        0.0        0.1       15.9      286.9        0.0        0.0        2.2       1.94       0.08       0.68       5.67
 HCFC-22          2107.0        0.0     8536.0        3.3       1.15        0.0        0.0        0.0        0.0   278568.7        0.0        0.1       13.7      282.5        0.0        0.0        1.9       1.85       0.08       0.63       5.36
 HCFC-22          2108.0        0.0     8532.7        3.2       1.07        0.0        0.0        0.0        0.0   278539.1        0.0        0.1       11.8      278.2        0.0        0.0        1.6       1.77       0.07       0.58       5.06
 HCFC-22          2109.0        0.0     8529.5        3.1       1.00        0.0        0.0        0.0        0.0   278510.1        0.0        0.0       10.1      274.0        0.0        0.0        1.4       1.70       0.06       0.53       4.78
 HCFC-22          2110.0        0.0     8526.3        3.1       0.93        0.0        0.0        0.0        0.0   278481.7        0.0        0.0        8.7      269.9        0.0        0.0        1.2       1.62       0.05       0.49       4.51
 HCFC-22          2111.0        0.0     8523.3        3.0       0.87        0.0        0.0        0.0        0.0   278453.7        0.0        0.0        7.5      266.0        0.0        0.0        1.0       1.55       0.05       0.45       4.26
 HCFC-22          2112.0        0.0     8520.3        2.9       0.82        0.0        0.0        0.0        0.0   278426.3        0.0        0.0        6.4      262.1        0.0        0.0        0.9       1.49       0.04       0.41       4.02
 HCFC-22          2113.0        0.0     8517.4        2.8       0.76        0.0        0.0        0.0        0.0   278399.3        0.0        0.0        5.5      258.3        0.0        0.0        0.7       1.43       0.04       0.38       3.79
 HCFC-22          2114.0        0.0     8514.5        2.8       0.71        0.0        0.0        0.0        0.0   278372.9        0.0        0.0        4.8      254.7        0.0        0.0        0.6       1.37       0.04       0.35       3.58
 HCFC-22          2115.0        0.0     8511.8        2.7       0.67        0.0        0.0        0.0        0.0   278346.9        0.0        0.0        4.1      251.1        0.0        0.0        0.6       1.31       0.03       0.32       3.38
 HCFC-22          2116.0        0.0     8509.1        2.7       0.62        0.0        0.0        0.0        0.0   278321.4        0.0        0.0        3.5      247.6        0.0        0.0        0.5       1.26       0.03       0.30       3.20
 HCFC-22          2117.0        0.0     8506.4        2.6       0.58        0.0        0.0        0.0        0.0   278296.3        0.0        0.0        3.0      244.2        0.0        0.0        0.4       1.21       0.03       0.27       3.02
 HCFC-22          2118.0        0.0     8503.8        2.5       0.55        0.0        0.0        0.0        0.0   278271.6        0.0        0.0        2.6      240.8        0.0        0.0        0.4       1.16       0.02       0.25       2.85
 HCFC-22          2119.0        0.0     8501.3        2.5       0.51        0.0        0.0        0.0        0.0   278247.4        0.0        0.0        2.2      237.6        0.0        0.0        0.3       1.12       0.02       0.23       2.69
 HCFC-22          2120.0        0.0     8498.8        2.4       0.48        0.0        0.0        0.0        0.0   278223.6        0.0        0.0        1.9      234.4        0.0        0.0        0.3       1.07       0.02       0.21       2.54
 
 Species            Year  Prod_mean  Bank_mean  Emis_mean   Mix_mean  Prod_stdv  Prod_2.5p   Prod_50p Prod_97.5p  Bank_stdv  Bank_2.5p   Bank_50p Bank_97.5p  Emis_stdv  Emis_2.5p   Emis_50p Emis_97.5p   Mix_stdv   Mix_2.5p    Mix_50p  Mix_97.5p
 HCFC-141b        1950.0        0.0        0.0        0.0       0.00        0.0        0.0        0.0        0.0        0.0        0.0        0.0        0.0        0.0        0.0        0.0        0.0       0.00       0.00       0.00       0.00
 HCFC-141b        1951.0        0.0        0.0        0.0       0.00        0.0        0.0        0.0        0.0        0.0        0.0        0.0        0.0        0.0        0.0        0.0        0.0       0.00       0.00       0.00       0.00
 HCFC-141b        1952.0        0.0        0.0        0.0       0.00        0.0        0.0        0.0        0.0        0.0        0.0        0.0        0.0        0.0        0.0        0.0        0.0       0.00       0.00       0.00       0.00
 HCFC-141b        1953.0        0.0        0.0        0.0       0.00        0.0        0.0        0.0        0.0        0.0        0.0        0.0        0.0        0.0        0.0        0.0        0.0       0.00       0.00       0.00       0.00
 HCFC-141b        1954.0        0.0        0.0        0.0       0.00        0.0        0.0        0.0        0.0        0.0        0.0        0.0        0.0        0.0        0.0        0.0        0.0       0.00       0.00       0.00       0.00
 HCFC-141b        1955.0        0.0        0.0        0.0       0.00        0.0        0.0        0.0        0.0        0.0        0.0        0.0        0.0        0.0        0.0        0.0        0.0       0.00       0.00       0.00       0.00
 HCFC-141b        1956.0        0.0        0.0        0.0       0.00        0.0        0.0        0.0        0.0        0.0        0.0        0.0        0.0        0.0        0.0        0.0        0.0       0.00       0.00       0.00       0.00
 HCFC-141b        1957.0        0.0        0.0        0.0       0.00        0.0        0.0        0.0        0.0        0.0        0.0        0.0        0.0        0.0        0.0        0.0        0.0       0.00       0.00       0.00       0.00
 HCFC-141b        1958.0        0.0        0.0        0.0       0.00        0.0        0.0        0.0        0.0        0.0        0.0        0.0        0.0        0.0        0.0        0.0        0.0       0.00       0.00       0.00       0.00
 HCFC-141b        1959.0        0.0        0.0        0.0       0.00        0.0        0.0        0.0        0.0        0.0        0.0        0.0        0.0        0.0        0.0        0.0        0.0       0.00       0.00       0.00       0.00
 HCFC-141b        1960.0        0.0        0.0        0.0       0.00        0.0        0.0        0.0        0.0        0.0        0.0        0.0        0.0        0.0        0.0        0.0        0.0       0.00       0.00       0.00       0.00
 HCFC-141b        1961.0        0.0        0.0        0.0       0.00        0.0        0.0        0.0        0.0        0.0        0.0        0.0        0.0        0.0        0.0        0.0        0.0       0.00       0.00       0.00       0.00
 HCFC-141b        1962.0        0.0        0.0        0.0       0.00        0.0        0.0        0.0        0.0        0.0        0.0        0.0        0.0        0.0        0.0        0.0        0.0       0.00       0.00       0.00       0.00
 HCFC-141b        1963.0        0.0        0.0        0.0       0.00        0.0        0.0        0.0        0.0        0.0        0.0        0.0        0.0        0.0        0.0        0.0        0.0       0.00       0.00       0.00       0.00
 HCFC-141b        1964.0        0.0        0.0        0.0       0.00        0.0        0.0        0.0        0.0        0.0        0.0        0.0        0.0        0.0        0.0        0.0        0.0       0.00       0.00       0.00       0.00
 HCFC-141b        1965.0        0.0        0.0        0.0       0.00        0.0        0.0        0.0        0.0        0.0        0.0        0.0        0.0        0.0        0.0        0.0        0.0       0.00       0.00       0.00       0.00
 HCFC-141b        1966.0        0.0        0.0        0.0       0.00        0.0        0.0        0.0        0.0        0.0        0.0        0.0        0.0        0.0        0.0        0.0        0.0       0.00       0.00       0.00       0.00
 HCFC-141b        1967.0        0.0        0.0        0.0       0.00        0.0        0.0        0.0        0.0        0.0        0.0        0.0        0.0        0.0        0.0        0.0        0.0       0.00       0.00       0.00       0.00
 HCFC-141b        1968.0        0.0        0.0        0.0       0.00        0.0        0.0        0.0        0.0        0.0        0.0        0.0        0.0        0.0        0.0        0.0        0.0       0.00       0.00       0.00       0.00
 HCFC-141b        1969.0        0.0        0.0        0.0       0.00        0.0        0.0        0.0        0.0        0.0        0.0        0.0        0.0        0.0        0.0        0.0        0.0       0.00       0.00       0.00       0.00
 HCFC-141b        1970.0        0.0        0.0        0.0       0.00        0.0        0.0        0.0        0.0        0.0        0.0        0.0        0.0        0.0        0.0        0.0        0.0       0.00       0.00       0.00       0.00
 HCFC-141b        1971.0        0.0        0.0        0.0       0.00        0.0        0.0        0.0        0.0        0.0        0.0        0.0        0.0        0.0        0.0        0.0        0.0       0.00       0.00       0.00       0.00
 HCFC-141b        1972.0        0.0        0.0        0.0       0.00        0.0        0.0        0.0        0.0        0.0        0.0        0.0        0.0        0.0        0.0        0.0        0.0       0.00       0.00       0.00       0.00
 HCFC-141b        1973.0        0.0        0.0        0.0       0.00        0.0        0.0        0.0        0.0        0.0        0.0        0.0        0.0        0.0        0.0        0.0        0.0       0.00       0.00       0.00       0.00
 HCFC-141b        1974.0        0.0        0.0        0.0       0.00        0.0        0.0        0.0        0.0        0.0        0.0        0.0        0.0        0.0        0.0        0.0        0.0       0.00       0.00       0.00       0.00
 HCFC-141b        1975.0        0.0        0.0        0.0       0.00        0.0        0.0        0.0        0.0        0.0        0.0        0.0        0.0        0.0        0.0        0.0        0.0       0.00       0.00       0.00       0.00
 HCFC-141b        1976.0        0.0        0.0        0.0       0.00        0.0        0.0        0.0        0.0        0.0        0.0        0.0        0.0        0.0        0.0        0.0        0.0       0.00       0.00       0.00       0.00
 HCFC-141b        1977.0        0.0        0.0        0.0       0.00        0.0        0.0        0.0        0.0        0.0        0.0        0.0        0.0        0.0        0.0        0.0        0.0       0.00       0.00       0.00       0.00
 HCFC-141b        1978.0        0.0        0.0        0.0       0.00        0.0        0.0        0.0        0.0        0.0        0.0        0.0        0.0        0.0        0.0        0.0        0.0       0.00       0.00       0.00       0.00
 HCFC-141b        1979.0        0.0        0.0        0.0       0.00        0.0        0.0        0.0        0.0        0.0        0.0        0.0        0.0        0.0        0.0        0.0        0.0       0.00       0.00       0.00       0.00
 HCFC-141b        1980.0        0.0        0.0        0.0       0.00        0.0        0.0        0.0        0.0        0.0        0.0        0.0        0.0        0.0        0.0        0.0        0.0       0.00       0.00       0.00       0.00
 HCFC-141b        1981.0        0.0        0.0        0.0       0.00        0.0        0.0        0.0        0.0        0.0        0.0        0.0        0.0        0.0        0.0        0.0        0.0       0.00       0.00       0.00       0.00
 HCFC-141b        1982.0        0.0        0.0        0.0       0.00        0.0        0.0        0.0        0.0        0.0        0.0        0.0        0.0        0.0        0.0        0.0        0.0       0.00       0.00       0.00       0.00
 HCFC-141b        1983.0        0.0        0.0        0.0       0.00        0.0        0.0        0.0        0.0        0.0        0.0        0.0        0.0        0.0        0.0        0.0        0.0       0.00       0.00       0.00       0.00
 HCFC-141b        1984.0        0.0        0.0        0.0       0.00        0.0        0.0        0.0        0.0        0.0        0.0        0.0        0.0        0.0        0.0        0.0        0.0       0.00       0.00       0.00       0.00
 HCFC-141b        1985.0        0.0        0.0        0.0       0.00        0.0        0.0        0.0        0.0        0.0        0.0        0.0        0.0        0.0        0.0        0.0        0.0       0.00       0.00       0.00       0.00
 HCFC-141b        1986.0        0.0        0.0        0.0       0.00        0.0        0.0        0.0        0.0        0.0        0.0        0.0        0.0        0.0        0.0        0.0        0.0       0.00       0.00       0.00       0.00
 HCFC-141b        1987.0        0.0        0.0        0.0       0.00        0.0        0.0        0.0        0.0        0.0        0.0        0.0        0.0        0.0        0.0        0.0        0.0       0.00       0.00       0.00       0.00
 HCFC-141b        1988.0        0.0        0.0        0.0       0.00        0.0        0.0        0.0        0.0        0.0        0.0        0.0        0.0        0.0        0.0        0.0        0.0       0.00       0.00       0.00       0.00
 HCFC-141b        1989.0     1007.1        0.0        0.0       0.00       50.3      908.5     1007.1     1105.8        0.0        0.0        0.0        0.0        0.0        0.0        0.0        0.0       0.00       0.00       0.00       0.00
 HCFC-141b        1990.0     6332.1    71201.2      116.7       0.00      316.4     5711.7     6332.1     6952.5   211991.7  -344650.7    71450.4   486328.7        3.7      109.6      116.6      124.3       0.00       0.00       0.00       0.00
 HCFC-141b        1991.0    11657.0    77416.6     1084.8       0.01      582.5    10515.0    11657.1    12799.1   211873.6  -338210.8    77660.9   492324.8       34.2     1020.4     1083.8     1154.8       0.00       0.01       0.01       0.01
 HCFC-141b        1992.0    16982.0    87988.9     5889.6       0.06      848.6    15318.3    16982.0    18645.8   211652.8  -327133.9    88233.0   502616.5      188.0     5535.6     5884.4     6274.3       0.00       0.06       0.06       0.06
 HCFC-141b        1993.0    27827.0    99081.3    18821.0       0.34     1390.6    25100.8    27827.0    30553.3   211308.9  -315299.2    99410.0   512791.9      617.1    17657.0    18805.2    20081.9       0.00       0.34       0.34       0.34
 HCFC-141b        1994.0    85453.6   108087.3    31654.7       1.24     4270.4    77081.6    85453.6    93825.7   210689.3  -305352.4   108384.7   520806.2     1128.3    29520.9    31626.9    33947.4       0.00       1.24       1.24       1.24
 HCFC-141b        1995.0   112282.5   161886.1    41661.5       2.67     5611.1   101282.1   112282.6   123283.1   208952.2  -248559.9   162293.1   571177.3     1668.4    38498.2    41625.7    45044.5       0.00       2.67       2.67       2.67
 HCFC-141b        1996.0   106451.0   232507.2    49602.9       4.45     5319.7    96021.9   106451.0   116880.3   206714.1  -173160.0   232951.2   637506.7     2249.1    45319.6    49559.6    54149.1       0.00       4.45       4.45       4.45
 HCFC-141b        1997.0   114232.0   289355.3    48413.0       6.45     5708.6   103040.6   114232.1   125423.6   204542.7  -112107.3   289643.2   690206.5     2684.7    43271.8    48369.5    53817.3       0.00       6.45       6.45       6.45
 HCFC-141b        1998.0   133761.0   355174.3    55282.5       8.18     6684.5   120656.3   133761.1   146866.0   202273.6   -41743.4   355502.2   751313.0     3269.1    49002.8    55231.3    61855.2       0.00       8.18       8.18       8.18
 HCFC-141b        1999.0   144272.0   433652.7    55448.5      10.08     7209.8   130137.5   144272.1   158406.7   199800.5    41600.6   434013.3   825020.4     3759.5    48206.1    55401.9    62997.2       0.00      10.08      10.08      10.08
 HCFC-141b        2000.0   140360.0   522476.3    58154.8      11.79     7014.3   126608.8   140360.1   154111.5   197349.0   135149.7   522831.3   908992.9     4265.5    49930.2    58105.7    66708.8       0.00      11.79      11.79      11.79
 HCFC-141b        2001.0   130891.0   604681.5    55557.0      13.46     6541.1   118067.5   130891.1   143714.8   195133.3   221992.0   604978.7   987208.2     4667.9    46537.7    55509.4    64898.4       0.00      13.46      13.46      13.46
 HCFC-141b        2002.0   148628.0   680015.5    56265.4      14.84     7427.4   134066.8   148628.1   163189.5   193228.2   300943.8   680252.8  1058484.3     5057.4    46484.2    56213.6    66373.1       0.00      14.84      14.84      14.84
 HCFC-141b        2003.0    90918.6   772378.1    50808.3      16.11     4543.5    82011.2    90918.6    99826.2   191484.7   396354.4   772440.5  1147731.5     5319.2    40492.2    50752.2    61411.7       0.00      16.11      16.11      16.11
 HCFC-141b        2004.0    77687.9   812488.4    44438.7      16.99     3882.3    70076.7    77687.9    85299.2   190322.4   438830.9   812527.1  1185499.0     5467.1    33815.9    44387.1    55301.1       0.00      16.99      16.99      16.99
 HCFC-141b        2005.0    58631.3   845737.6    43110.4      17.46     2930.0    52887.1    58631.3    64375.6   189432.8   473815.4   845719.8  1216811.1     5581.8    32268.6    43060.2    54190.4       0.00      17.46      17.46      17.46
 HCFC-141b        2006.0    84562.2   861258.4    51365.6      17.83     4225.9    76277.6    84562.3    92847.0   188809.0   490853.9   861148.2  1230793.9     5807.5    40085.4    51305.9    62928.6       0.00      17.83      17.83      17.83
 HCFC-141b        2007.0    94155.0   894455.1    47278.1      18.56     4705.2    84930.6    94155.0   103379.6   188352.3   525258.9   894409.3  1263570.8     5952.1    35717.6    47223.6    59093.2       0.00      18.56      18.56      18.56
 HCFC-141b        2008.0    97044.1   941332.0    51123.6      19.01     4849.6    87536.6    97044.2   106551.8   188166.2   572441.4   941334.0  1310241.0     6138.2    39193.5    51064.0    63328.6       0.00      19.01      19.01      19.01
 HCFC-141b        2009.0   117637.1   987252.6    72379.8      19.61     5878.7   106112.1   117637.2   129162.4   188294.3   618001.5   987291.9  1356804.1    20654.7    41634.1    70877.1   109644.4       0.00      19.61      19.61      19.61
 HCFC-141b        2010.0   139070.0  1032509.9    76374.0      21.20     6949.8   125445.2   139070.1   152695.1   196899.1   640347.3  1034919.8  1411695.4    18154.5    44994.4    75267.0   113764.4       1.03      19.67      21.13      23.04
 HCFC-141b        2011.0   150810.4  1095205.8    81045.3      22.83     7536.5   136035.3   150810.4   165585.7   206575.0   678412.0  1099521.8  1487925.8    18219.0    48621.6    80093.8   118938.2       1.80      19.89      22.71      26.36
 HCFC-141b        2012.0   162550.7  1164970.9    86213.1      24.52     8123.2   146625.5   162550.8   178476.3   217778.0   720971.1  1171213.5  1573882.4    18670.0    52507.8    85351.2   125067.5       2.51      20.28      24.37      29.62
 HCFC-141b        2013.0   133199.8  1241308.4    88980.5      26.30     6656.4   120150.1   133199.9   146249.8   230549.9   766032.5  1249211.8  1669750.1    18217.1    55245.8    88389.6   126577.6       3.19      20.83      26.12      32.89
 HCFC-141b        2014.0   133199.8  1285527.7    91585.4      28.05     6656.4   120150.1   133199.9   146249.8   243621.5   779443.4  1295156.3  1735454.8    17858.9    57839.6    91212.4   127946.1       3.79      21.45      27.83      35.93
 HCFC-141b        2015.0   107058.7  1327142.1    92217.2      29.74     5350.1    96570.1   107058.8   117547.6   256996.4   790626.5  1338123.3  1799721.8    16854.7    59438.7    92188.6   125519.9       4.32      22.14      29.51      38.77
 HCFC-141b        2016.0   107058.7  1341983.7    92850.3      31.30     5350.1    96570.1   107058.8   117547.6   269733.3   776961.0  1353939.4  1837505.3    16012.6    60996.8    93089.8   123435.1       4.76      22.83      31.07      41.26
 HCFC-141b        2017.0   107058.7  1356192.2    93469.9      32.74     5350.1    96570.1   107058.8   117547.6   282009.2   764824.7  1368497.1  1874254.6    15275.6    62491.3    93950.9   121771.5       5.12      23.51      32.51      43.47
 HCFC-141b        2018.0   107058.7  1369781.0    94071.9      34.07     5350.1    96570.1   107058.8   117547.6   293843.1   754598.9  1382004.1  1911119.9    14619.6    63927.4    94745.4   120447.9       5.43      24.20      33.84      45.42
 HCFC-141b        2019.0   107058.7  1382767.8    94654.0      35.29     5350.1    96570.1   107058.8   117547.6   305251.1   745865.3  1394745.8  1947623.1    14029.2    65319.8    95482.4   119375.7       5.69      24.89      35.07      47.15
 HCFC-141b        2020.0    70425.3  1395172.5    92678.8      36.43     3519.4    63525.7    70425.3    77325.1   316248.8   738216.2  1406413.3  1983702.4    12680.0    65433.2    93784.2   113896.6       5.92      25.57      36.21      48.72
 HCFC-141b        2021.0    70425.3  1372919.0    90900.1      37.35     3519.4    63525.7    70425.3    77325.1   325717.5   700099.2  1383233.0  1982893.8    11552.7    65553.0    92171.0   109548.1       6.07      26.16      37.14      49.93
 HCFC-141b        2022.0    70425.3  1352444.2    89283.9      38.10     3519.4    63525.7    70425.3    77325.1   334061.9   666585.6  1361630.8  1983761.9    10596.2    65655.2    90617.5   105951.3       6.17      26.69      37.90      50.88
 HCFC-141b        2023.0    70425.3  1333585.5    87811.2      38.70     3519.4    63525.7    70425.3    77325.1   341441.5   637722.1  1341192.4  1984333.4     9778.7    65756.9    89134.6   102957.8       6.23      27.15      38.50      51.60
 HCFC-141b        2024.0    70425.3  1316199.6    86466.6      39.16     3519.4    63525.7    70425.3    77325.1   347985.5   612720.6  1321955.0  1985738.4     9076.6    65835.6    87740.5   100397.8       6.27      27.55      38.96      52.13
 HCFC-141b        2025.0    35469.1  1300158.3    82816.8      39.52     1772.5    31994.1    35469.1    38944.1   353802.1   591226.7  1304016.4  1986588.1     8025.1    64353.6    83949.4    94965.2       6.29      27.89      39.31      52.55
 HCFC-141b        2026.0    35469.1  1252810.6    79478.9      39.67     1772.5    31994.1    35469.1    38944.1   357951.7   542369.8  1254554.1  1953189.5     7215.3    62961.2    80448.1    90380.9       6.26      28.13      39.44      52.67
 HCFC-141b        2027.0    35469.1  1208800.8    76410.5      39.63     1772.5    31994.1    35469.1    38944.1   360842.1   499907.7  1208221.4  1921044.5     6618.0    61415.7    77227.1    86442.2       6.22      28.25      39.38      52.59
 HCFC-141b        2028.0    35469.1  1167859.4    73584.6      39.46     1772.5    31994.1    35469.1    38944.1   362677.2   463122.3  1164817.8  1890527.1     6188.9    59653.3    74302.5    82998.3       6.16      28.28      39.17      52.38
 HCFC-141b        2029.0    35469.1  1129743.9    70978.3      39.16     1772.5    31994.1    35469.1    38944.1   363623.6   431318.8  1124082.6  1861006.5     5888.2    57741.5    71644.3    79939.4       6.10      28.21      38.84      52.04
 HCFC-141b        2030.0     2688.9  1094234.7    66302.2      38.77      134.4     2425.5     2688.9     2952.4   363821.2   403918.7  1085935.0  1832823.4     6068.3    52592.7    67083.2    74956.6       6.04      28.06      38.42      51.62
 HCFC-141b        2031.0     2688.9  1030621.4    62003.5      38.19      134.4     2425.5     2688.9     2952.4   362480.5   351938.1  1019557.3  1773310.0     6349.7    46795.9    62977.3    70622.7       5.97      27.74      37.80      50.99
 HCFC-141b        2032.0     2688.9   971306.9    58036.0      37.46      134.4     2425.5     2688.9     2952.4   359963.2   306901.4   957474.1  1716237.6     6688.7    41175.2    59229.3    66790.8       5.90      27.26      37.04      50.22
 HCFC-141b        2033.0     2688.9   915959.8    54368.6      36.61      134.4     2425.5     2688.9     2952.4   356480.4   267941.2   899272.0  1660652.9     7025.6    36073.0    55791.2    63327.8       5.84      26.62      36.16      49.32
 HCFC-141b        2034.0     2688.9   864280.2    50974.4      35.67      134.4     2425.5     2688.9     2952.4   352205.8   234152.6   844798.8  1607629.6     7329.4    31609.8    52600.8    60208.6       5.79      25.85      35.19      48.34
 HCFC-141b        2035.0     2688.9   815994.7    47829.8      34.65      134.4     2425.5     2688.9     2952.4   347285.4   204990.2   793812.7  1556127.0     7586.3    27702.5    49627.1    57357.8       5.75      24.94      34.16      47.29
 HCFC-141b        2036.0     2688.9   770853.8    44913.8      33.59      134.4     2425.5     2688.9     2952.4   341842.7   179749.7   745985.5  1506999.6     7791.9    24326.8    46826.8    54764.6       5.72      23.95      33.08      46.21
 HCFC-141b        2037.0     2688.9   728629.0    42207.4      32.49      134.4     2425.5     2688.9     2952.4   335982.8   157788.8   701229.2  1458999.9     7947.0    21399.6    44161.6    52372.0       5.71      22.84      31.98      45.10
 HCFC-141b        2038.0     2688.9   689110.5    39693.7      31.36      134.4     2425.5     2688.9     2952.4   329795.4   138789.8   659248.9  1412425.1     8054.8    18863.6    41645.3    50146.7       5.70      21.70      30.86      43.96
 HCFC-141b        2039.0     2688.9   652105.7    37357.1      30.23      134.4     2425.5     2688.9     2952.4   323357.3   122307.0   619966.2  1367500.3     8119.5    16668.6    39249.1    48104.6       5.70      20.49      29.73      42.81
 HCFC-141b        2040.0        0.0   617437.6    34997.6      29.10        0.0        0.0        0.0        0.0   316734.1   108140.4   583173.8  1324872.6     8219.1    14414.5    36810.3    46075.8       5.70      19.28      28.60      41.63
 HCFC-141b        2041.0        0.0   582440.0    32804.5      27.96        0.0        0.0        0.0        0.0   309917.3    93569.6   546203.9  1280335.8     8267.1    12461.7    34504.3    44190.3       5.70      18.05      27.49      40.48
 HCFC-141b        2042.0        0.0   549635.5    30763.8      26.83        0.0        0.0        0.0        0.0   302968.9    80918.3   511580.8  1237170.3     8274.6    10770.6    32332.6    42421.9       5.69      16.83      26.38      39.31
 HCFC-141b        2043.0        0.0   518871.7    28863.5      25.71        0.0        0.0        0.0        0.0   295939.6    69983.3   479102.4  1196037.9     8248.2     9307.8    30296.9    40759.5       5.69      15.63      25.28      38.18
 HCFC-141b        2044.0        0.0   490008.3    27092.7      24.62        0.0        0.0        0.0        0.0   288872.1    60580.4   448714.9  1156001.9     8193.0     8048.8    28384.5    39203.7       5.68      14.47      24.21      37.03
 HCFC-141b        2045.0        0.0   462915.5    25441.7      23.54        0.0        0.0        0.0        0.0   281802.8    52372.2   420264.7  1117244.8     8113.7     6957.8    26590.4    37728.6       5.66      13.35      23.15      35.88
 HCFC-141b        2046.0        0.0   437473.9    23901.3      22.49        0.0        0.0        0.0        0.0   274762.3    45310.4   393615.1  1080008.8     8013.9     6012.3    24907.7    36337.0       5.64      12.30      22.11      34.77
 HCFC-141b        2047.0        0.0   413572.5    22463.5      21.47        0.0        0.0        0.0        0.0   267776.8    39208.8   368671.7  1044061.2     7897.3     5199.5    23332.7    35021.3       5.61      11.31      21.11      33.68
 HCFC-141b        2048.0        0.0   391109.0    21120.6      20.48        0.0        0.0        0.0        0.0   260868.0    33903.5   345302.5  1009561.4     7766.6     4492.2    21854.5    33757.7       5.58      10.38      20.13      32.61
 HCFC-141b        2049.0        0.0   369988.5    19865.7      19.53        0.0        0.0        0.0        0.0   254054.2    29316.1   323414.9   975780.7     7624.4     3881.2    20473.2    32553.2       5.53       9.52      19.18      31.57
 HCFC-141b        2050.0        0.0   350122.8    18692.4      18.60        0.0        0.0        0.0        0.0   247350.7    25361.1   302900.8   943225.4     7473.0     3352.6    19174.6    31411.0       5.48       8.71      18.26      30.54
 HCFC-141b        2051.0        0.0   331430.4    17595.0      17.71        0.0        0.0        0.0        0.0   240770.1    21945.0   283677.6   912028.4     7314.4     2900.3    17959.9    30327.6       5.43       7.97      17.37      29.53
 HCFC-141b        2052.0        0.0   313835.4    16568.1      16.86        0.0        0.0        0.0        0.0   234322.6    18988.9   265684.8   881317.6     7150.1     2504.4    16819.0    29299.0       5.36       7.28      16.52      28.57
 HCFC-141b        2053.0        0.0   297267.3    15606.6      16.04        0.0        0.0        0.0        0.0   228016.7    16417.7   248785.1   852052.5     6981.6     2163.6    15755.1    28307.3       5.29       6.64      15.70      27.60
 HCFC-141b        2054.0        0.0   281660.7    14706.1      15.25        0.0        0.0        0.0        0.0   221858.8    14209.9   233004.2   823532.8     6810.3     1868.9    14757.6    27346.8       5.22       6.05      14.91      26.66
 HCFC-141b        2055.0        0.0   266954.6    13862.2      14.49        0.0        0.0        0.0        0.0   215854.0    12301.2   218193.0   795931.1     6637.1     1615.4    13822.3    26418.6       5.14       5.50      14.14      25.74
 HCFC-141b        2056.0        0.0   253092.4    13071.1      13.77        0.0        0.0        0.0        0.0   210006.2    10642.3   204399.7   769416.4     6463.1     1396.2    12946.2    25537.1       5.05       5.01      13.42      24.87
 HCFC-141b        2057.0        0.0   240021.3    12329.3      13.08        0.0        0.0        0.0        0.0   204317.9     9202.6   191451.0   743879.6     6289.1     1206.0    12125.8    24687.2       4.96       4.55      12.71      24.01
 HCFC-141b        2058.0        0.0   227692.0    11633.3      12.43        0.0        0.0        0.0        0.0   198790.8     7964.8   179296.9   719056.1     6115.7     1042.2    11355.6    23866.1       4.87       4.14      12.04      23.17
 HCFC-141b        2059.0        0.0   216058.8    10980.0      11.80        0.0        0.0        0.0        0.0   193425.8     6891.0   167929.5   695092.4     5943.5      900.2    10634.1    23068.7       4.77       3.76      11.40      22.38
 HCFC-141b        2060.0        0.0   205078.8    10366.6      11.20        0.0        0.0        0.0        0.0   188223.0     5962.8   157290.0   672021.3     5773.1      778.5     9960.5    22295.1       4.67       3.41      10.79      21.60
 HCFC-141b        2061.0        0.0   194712.1     9790.5      10.63        0.0        0.0        0.0        0.0   183181.9     5157.7   147298.7   649470.0     5604.8      673.3     9329.4    21549.4       4.57       3.09      10.21      20.85
 HCFC-141b        2062.0        0.0   184921.6     9249.2      10.09        0.0        0.0        0.0        0.0   178301.5     4462.1   137958.9   627855.6     5439.0      581.8     8737.5    20827.3       4.47       2.80       9.65      20.12
 HCFC-141b        2063.0        0.0   175672.3     8740.5       9.57        0.0        0.0        0.0        0.0   173580.2     3860.4   129212.7   607140.4     5276.1      502.8     8183.6    20126.8       4.37       2.53       9.12      19.41
 HCFC-141b        2064.0        0.0   166931.9     8262.0       9.08        0.0        0.0        0.0        0.0   169016.2     3341.0   121008.2   586886.3     5116.1      434.5     7663.7    19456.5       4.27       2.30       8.62      18.73
 HCFC-141b        2065.0        0.0   158669.8     7812.1       8.62        0.0        0.0        0.0        0.0   164607.3     2890.0   113334.7   567369.6     4959.5      375.5     7177.6    18802.6       4.16       2.08       8.14      18.06
 HCFC-141b        2066.0        0.0   150857.8     7388.7       8.17        0.0        0.0        0.0        0.0   160351.1     2498.9   106127.3   548503.2     4806.2      324.6     6722.5    18172.5       4.06       1.88       7.68      17.43
 HCFC-141b        2067.0        0.0   143469.1     6990.2       7.75        0.0        0.0        0.0        0.0   156244.8     2161.8    99393.4   530333.4     4656.4      280.5     6295.3    17568.9       3.95       1.70       7.24      16.82
 HCFC-141b        2068.0        0.0   136478.9     6615.0       7.36        0.0        0.0        0.0        0.0   152285.5     1870.4    93090.3   512670.8     4510.3      242.3     5895.1    16976.6       3.85       1.54       6.83      16.22
 HCFC-141b        2069.0        0.0   129864.0     6261.6       6.98        0.0        0.0        0.0        0.0   148470.3     1617.9    87182.7   495532.9     4367.8      209.4     5521.0    16414.5       3.75       1.39       6.44      15.65
 HCFC-141b        2070.0        0.0   123602.4     5928.7       6.62        0.0        0.0        0.0        0.0   144795.8     1400.0    81642.9   479134.6     4229.0      181.1     5170.8    15866.7       3.65       1.25       6.07      15.09
 HCFC-141b        2071.0        0.0   117673.7     5614.9       6.28        0.0        0.0        0.0        0.0   141259.0     1211.3    76456.0   463140.7     4093.9      156.3     4843.0    15329.8       3.54       1.13       5.73      14.56
 HCFC-141b        2072.0        0.0   112058.8     5319.2       5.95        0.0        0.0        0.0        0.0   137856.3     1048.1    71606.7   447748.5     3962.6      135.0     4536.0    14819.8       3.45       1.02       5.40      14.05
 HCFC-141b        2073.0        0.0   106739.6     5040.2       5.65        0.0        0.0        0.0        0.0   134584.5      906.7    67068.3   432845.6     3835.0      116.7     4248.0    14320.5       3.35       0.92       5.08      13.55
 HCFC-141b        2074.0        0.0   101699.4     4777.2       5.36        0.0        0.0        0.0        0.0   131440.0      784.3    62815.5   418326.2     3711.0      100.9     3978.6    13842.9       3.25       0.83       4.79      13.07
 HCFC-141b        2075.0        0.0    96922.2     4529.0       5.08        0.0        0.0        0.0        0.0   128419.5      678.1    58827.7   404413.2     3590.7       87.2     3726.1    13381.2       3.16       0.75       4.51      12.61
 HCFC-141b        2076.0        0.0    92393.3     4294.7       4.82        0.0        0.0        0.0        0.0   125519.4      586.2    55097.6   390996.5     3474.0       75.4     3489.7    12931.8       3.06       0.67       4.24      12.17
 HCFC-141b        2077.0        0.0    88098.6     4073.5       4.57        0.0        0.0        0.0        0.0   122736.2      507.3    51603.0   378055.9     3360.9       65.2     3268.1    12504.1       2.97       0.61       4.00      11.75
 HCFC-141b        2078.0        0.0    84025.0     3864.7       4.34        0.0        0.0        0.0        0.0   120066.6      438.6    48333.3   365531.3     3251.2       56.3     3060.4    12087.1       2.88       0.55       3.76      11.34
 HCFC-141b        2079.0        0.0    80160.4     3667.4       4.12        0.0        0.0        0.0        0.0   117507.1      379.6    45270.2   353399.9     3145.0       48.7     2866.1    11684.9       2.79       0.49       3.54      10.94
 HCFC-141b        2080.0        0.0    76493.0     3481.0       3.91        0.0        0.0        0.0        0.0   115054.1      328.4    42400.9   341696.6     3042.1       42.1     2684.8    11294.0       2.71       0.44       3.33      10.56
 HCFC-141b        2081.0        0.0    73011.9     3304.9       3.71        0.0        0.0        0.0        0.0   112704.5      284.4    39711.0   330371.2     2942.5       36.4     2514.4    10916.3       2.62       0.40       3.13      10.19
 HCFC-141b        2082.0        0.0    69707.1     3138.3       3.52        0.0        0.0        0.0        0.0   110454.7      245.9    37198.4   319470.8     2846.1       31.4     2354.4    10550.3       2.54       0.36       2.94       9.84
 HCFC-141b        2083.0        0.0    66568.7     2980.9       3.34        0.0        0.0        0.0        0.0   108301.5      212.7    34840.9   308784.8     2752.8       27.2     2204.9    10198.6       2.46       0.32       2.77       9.49
 HCFC-141b        2084.0        0.0    63587.8     2832.0       3.17        0.0        0.0        0.0        0.0   106241.7      184.1    32628.6   298480.5     2662.6       23.5     2064.8     9857.3       2.39       0.29       2.60       9.17
 HCFC-141b        2085.0        0.0    60755.9     2691.1       3.01        0.0        0.0        0.0        0.0   104271.9      159.2    30562.1   288511.8     2575.4       20.3     1933.9     9528.3       2.31       0.26       2.44       8.85
 HCFC-141b        2086.0        0.0    58064.8     2557.8       2.86        0.0        0.0        0.0        0.0   102389.1      137.6    28624.7   278908.8     2491.0       17.5     1810.9     9209.1       2.24       0.23       2.30       8.54
 HCFC-141b        2087.0        0.0    55507.0     2431.6       2.71        0.0        0.0        0.0        0.0   100590.2      119.0    26811.5   269632.3     2409.4       15.2     1696.1     8903.3       2.17       0.21       2.16       8.25
 HCFC-141b        2088.0        0.0    53075.5     2312.1       2.58        0.0        0.0        0.0        0.0    98872.0      102.9    25107.2   260733.4     2330.6       13.1     1588.4     8606.8       2.10       0.19       2.03       7.96
 HCFC-141b        2089.0        0.0    50763.4     2199.0       2.45        0.0        0.0        0.0        0.0    97231.7       89.0    23513.8   252018.3     2254.4       11.3     1487.8     8317.2       2.03       0.17       1.91       7.69
 HCFC-141b        2090.0        0.0    48564.4     2091.8       2.32        0.0        0.0        0.0        0.0    95666.2       77.0    22020.7   243682.3     2180.7        9.8     1393.4     8039.8       1.96       0.15       1.79       7.42
 HCFC-141b        2091.0        0.0    46472.6     1990.3       2.21        0.0        0.0        0.0        0.0    94172.8       66.6    20621.1   235562.6     2109.6        8.5     1304.9     7773.3       1.90       0.14       1.68       7.17
 HCFC-141b        2092.0        0.0    44482.4     1894.1       2.10        0.0        0.0        0.0        0.0    92748.5       57.6    19314.5   227873.8     2040.9        7.3     1221.9     7515.3       1.84       0.12       1.58       6.92
 HCFC-141b        2093.0        0.0    42588.3     1802.9       1.99        0.0        0.0        0.0        0.0    91390.8       49.8    18090.9   220282.5     1974.5        6.3     1144.6     7262.2       1.78       0.11       1.48       6.68
 HCFC-141b        2094.0        0.0    40785.4     1716.4       1.89        0.0        0.0        0.0        0.0    90096.9       43.1    16945.2   212943.6     1910.3        5.5     1072.0     7020.8       1.72       0.10       1.39       6.45
 HCFC-141b        2095.0        0.0    39069.0     1634.4       1.80        0.0        0.0        0.0        0.0    88864.3       37.3    15870.5   205810.9     1848.4        4.7     1004.0     6785.6       1.67       0.09       1.31       6.23
 HCFC-141b        2096.0        0.0    37434.6     1556.7       1.71        0.0        0.0        0.0        0.0    87690.3       32.3    14865.2   199028.0     1788.6        4.1      940.2     6558.7       1.61       0.08       1.23       6.01
 HCFC-141b        2097.0        0.0    35877.9     1482.9       1.63        0.0        0.0        0.0        0.0    86572.6       27.9    13921.6   192426.5     1730.8        3.5      880.6     6340.0       1.56       0.07       1.15       5.80
 HCFC-141b        2098.0        0.0    34395.0     1412.9       1.55        0.0        0.0        0.0        0.0    85508.8       24.1    13038.9   185976.4     1675.0        3.0      824.7     6128.6       1.51       0.06       1.08       5.61
 HCFC-141b        2099.0        0.0    32982.1     1346.5       1.47        0.0        0.0        0.0        0.0    84496.6       20.9    12212.8   179789.3     1621.1        2.6      772.4     5923.2       1.46       0.06       1.02       5.41
 HCFC-141b        2100.0        0.0    31635.6     1283.4       1.40        0.0        0.0        0.0        0.0    83533.6       18.1    11438.6   173850.5     1569.1        2.3      723.4     5724.5       1.41       0.05       0.96       5.22
 HCFC-141b        2101.0        0.0    30352.2     1223.5       1.33        0.0        0.0        0.0        0.0    82617.8       15.6    10712.6   168076.9     1518.8        2.0      677.7     5534.4       1.36       0.05       0.90       5.04
 HCFC-141b        2102.0        0.0    29128.7     1166.7       1.27        0.0        0.0        0.0        0.0    81747.1       13.5    10033.2   162471.4     1470.3        1.7      634.6     5349.5       1.32       0.04       0.84       4.87
 HCFC-141b        2103.0        0.0    27962.0     1112.6       1.21        0.0        0.0        0.0        0.0    80919.4       11.7     9396.8   157067.2     1423.4        1.5      594.3     5169.9       1.28       0.04       0.79       4.70
 HCFC-141b        2104.0        0.0    26849.4     1061.3       1.15        0.0        0.0        0.0        0.0    80132.7       10.1     8801.3   151823.8     1378.2        1.3      556.5     4998.9       1.24       0.03       0.74       4.54
 HCFC-141b        2105.0        0.0    25788.1     1012.5       1.09        0.0        0.0        0.0        0.0    79385.2        8.8     8243.2   146806.7     1334.5        1.1      521.2     4832.5       1.20       0.03       0.70       4.38
 HCFC-141b        2106.0        0.0    24775.6      966.2       1.04        0.0        0.0        0.0        0.0    78675.1        7.6     7719.3   141907.0     1292.3        0.9      488.2     4670.3       1.16       0.03       0.65       4.23
 HCFC-141b        2107.0        0.0    23809.4      922.1       0.99        0.0        0.0        0.0        0.0    78000.5        6.6     7229.7   137181.4     1251.5        0.8      457.2     4515.2       1.12       0.02       0.61       4.08
 HCFC-141b        2108.0        0.0    22887.2      880.2       0.94        0.0        0.0        0.0        0.0    77359.9        5.7     6771.1   132597.3     1212.2        0.7      428.2     4364.6       1.08       0.02       0.58       3.94
 HCFC-141b        2109.0        0.0    22007.0      840.4       0.90        0.0        0.0        0.0        0.0    76751.5        4.9     6341.5   128196.4     1174.2        0.6      401.0     4218.4       1.05       0.02       0.54       3.80
 HCFC-141b        2110.0        0.0    21166.6      802.5       0.86        0.0        0.0        0.0        0.0    76173.8        4.2     5939.3   123949.6     1137.5        0.5      375.6     4077.5       1.01       0.02       0.51       3.67
 HCFC-141b        2111.0        0.0    20364.2      766.4       0.82        0.0        0.0        0.0        0.0    75625.4        3.7     5563.0   119826.7     1102.0        0.5      351.8     3940.0       0.98       0.02       0.47       3.55
 HCFC-141b        2112.0        0.0    19597.8      732.1       0.78        0.0        0.0        0.0        0.0    75104.8        3.2     5210.0   115843.4     1067.8        0.4      329.5     3808.5       0.95       0.01       0.45       3.43
 HCFC-141b        2113.0        0.0    18865.7      699.4       0.74        0.0        0.0        0.0        0.0    74610.6        2.7     4878.7   111956.3     1034.7        0.3      308.6     3680.9       0.92       0.01       0.42       3.31
 HCFC-141b        2114.0        0.0    18166.2      668.4       0.71        0.0        0.0        0.0        0.0    74141.5        2.4     4569.1   108256.8     1002.8        0.3      289.0     3558.9       0.89       0.01       0.39       3.19
 HCFC-141b        2115.0        0.0    17497.9      638.8       0.67        0.0        0.0        0.0        0.0    73696.3        2.1     4279.3   104650.6      971.9        0.3      270.6     3440.1       0.86       0.01       0.37       3.08
 HCFC-141b        2116.0        0.0    16859.1      610.6       0.64        0.0        0.0        0.0        0.0    73273.8        1.8     4007.1   101183.1      942.1        0.2      253.5     3325.1       0.83       0.01       0.34       2.98
 HCFC-141b        2117.0        0.0    16248.5      583.7       0.61        0.0        0.0        0.0        0.0    72872.8        1.5     3752.3    97819.0      913.3        0.2      237.4     3213.3       0.81       0.01       0.32       2.87
 HCFC-141b        2118.0        0.0    15664.8      558.2       0.58        0.0        0.0        0.0        0.0    72492.2        1.3     3514.3    94554.5      885.5        0.2      222.3     3106.6       0.78       0.01       0.30       2.77
 HCFC-141b        2119.0        0.0    15106.6      533.8       0.56        0.0        0.0        0.0        0.0    72131.0        1.1     3291.1    91415.9      858.6        0.1      208.2     3002.7       0.76       0.01       0.28       2.68
 HCFC-141b        2120.0        0.0    14572.8      510.6       0.53        0.0        0.0        0.0        0.0    71788.1        1.0     3082.3    88385.1      832.6        0.1      195.0     2902.6       0.73       0.01       0.27       2.59
 
 Species            Year  Prod_mean  Bank_mean  Emis_mean   Mix_mean  Prod_stdv  Prod_2.5p   Prod_50p Prod_97.5p  Bank_stdv  Bank_2.5p   Bank_50p Bank_97.5p  Emis_stdv  Emis_2.5p   Emis_50p Emis_97.5p   Mix_stdv   Mix_2.5p    Mix_50p  Mix_97.5p
 HCFC-142b        1950.0        0.0        0.0        0.0       0.00        0.0        0.0        0.0        0.0        0.0        0.0        0.0        0.0        0.0        0.0        0.0        0.0       0.00       0.00       0.00       0.00
 HCFC-142b        1951.0        0.0        0.0        0.0       0.00        0.0        0.0        0.0        0.0        0.0        0.0        0.0        0.0        0.0        0.0        0.0        0.0       0.00       0.00       0.00       0.00
 HCFC-142b        1952.0        0.0        0.0        0.0       0.00        0.0        0.0        0.0        0.0        0.0        0.0        0.0        0.0        0.0        0.0        0.0        0.0       0.00       0.00       0.00       0.00
 HCFC-142b        1953.0        0.0        0.0        0.0       0.00        0.0        0.0        0.0        0.0        0.0        0.0        0.0        0.0        0.0        0.0        0.0        0.0       0.00       0.00       0.00       0.00
 HCFC-142b        1954.0        0.0        0.0        0.0       0.00        0.0        0.0        0.0        0.0        0.0        0.0        0.0        0.0        0.0        0.0        0.0        0.0       0.00       0.00       0.00       0.00
 HCFC-142b        1955.0        0.0        0.0        0.0       0.00        0.0        0.0        0.0        0.0        0.0        0.0        0.0        0.0        0.0        0.0        0.0        0.0       0.00       0.00       0.00       0.00
 HCFC-142b        1956.0        0.0        0.0        0.0       0.00        0.0        0.0        0.0        0.0        0.0        0.0        0.0        0.0        0.0        0.0        0.0        0.0       0.00       0.00       0.00       0.00
 HCFC-142b        1957.0        0.0        0.0        0.0       0.00        0.0        0.0        0.0        0.0        0.0        0.0        0.0        0.0        0.0        0.0        0.0        0.0       0.00       0.00       0.00       0.00
 HCFC-142b        1958.0        0.0        0.0        0.0       0.00        0.0        0.0        0.0        0.0        0.0        0.0        0.0        0.0        0.0        0.0        0.0        0.0       0.00       0.00       0.00       0.00
 HCFC-142b        1959.0        0.0        0.0        0.0       0.00        0.0        0.0        0.0        0.0        0.0        0.0        0.0        0.0        0.0        0.0        0.0        0.0       0.00       0.00       0.00       0.00
 HCFC-142b        1960.0        0.0        0.0        0.0       0.00        0.0        0.0        0.0        0.0        0.0        0.0        0.0        0.0        0.0        0.0        0.0        0.0       0.00       0.00       0.00       0.00
 HCFC-142b        1961.0        0.0        0.0        0.0       0.00        0.0        0.0        0.0        0.0        0.0        0.0        0.0        0.0        0.0        0.0        0.0        0.0       0.00       0.00       0.00       0.00
 HCFC-142b        1962.0        0.0        0.0        0.0       0.00        0.0        0.0        0.0        0.0        0.0        0.0        0.0        0.0        0.0        0.0        0.0        0.0       0.00       0.00       0.00       0.00
 HCFC-142b        1963.0        0.0        0.0        0.0       0.00        0.0        0.0        0.0        0.0        0.0        0.0        0.0        0.0        0.0        0.0        0.0        0.0       0.00       0.00       0.00       0.00
 HCFC-142b        1964.0        0.0        0.0        0.0       0.00        0.0        0.0        0.0        0.0        0.0        0.0        0.0        0.0        0.0        0.0        0.0        0.0       0.00       0.00       0.00       0.00
 HCFC-142b        1965.0        0.0        0.0        0.0       0.00        0.0        0.0        0.0        0.0        0.0        0.0        0.0        0.0        0.0        0.0        0.0        0.0       0.00       0.00       0.00       0.00
 HCFC-142b        1966.0        0.0        0.0        0.0       0.00        0.0        0.0        0.0        0.0        0.0        0.0        0.0        0.0        0.0        0.0        0.0        0.0       0.00       0.00       0.00       0.00
 HCFC-142b        1967.0        0.0        0.0        0.0       0.00        0.0        0.0        0.0        0.0        0.0        0.0        0.0        0.0        0.0        0.0        0.0        0.0       0.00       0.00       0.00       0.00
 HCFC-142b        1968.0        0.0        0.0        0.0       0.00        0.0        0.0        0.0        0.0        0.0        0.0        0.0        0.0        0.0        0.0        0.0        0.0       0.00       0.00       0.00       0.00
 HCFC-142b        1969.0        0.0        0.0        0.0       0.00        0.0        0.0        0.0        0.0        0.0        0.0        0.0        0.0        0.0        0.0        0.0        0.0       0.00       0.00       0.00       0.00
 HCFC-142b        1970.0        0.0        0.0        0.0       0.00        0.0        0.0        0.0        0.0        0.0        0.0        0.0        0.0        0.0        0.0        0.0        0.0       0.00       0.00       0.00       0.00
 HCFC-142b        1971.0        0.0    32339.0      818.7       0.00        0.0        0.0        0.0        0.0    70832.1  -106190.5    32231.6   171219.4       24.8      772.2      818.0      869.4       0.00       0.00       0.00       0.00
 HCFC-142b        1972.0        0.0    31520.4      816.8       0.05        0.0        0.0        0.0        0.0    70826.1  -107007.2    31416.2   170392.6       26.2      767.5      816.1      870.3       0.00       0.05       0.05       0.05
 HCFC-142b        1973.0        0.0    30703.6      814.8       0.09        0.0        0.0        0.0        0.0    70818.1  -107805.9    30596.7   169566.1       28.6      760.8      814.1      873.2       0.00       0.09       0.09       0.09
 HCFC-142b        1974.0        0.0    29888.8      813.0       0.14        0.0        0.0        0.0        0.0    70808.1  -108600.5    29789.3   168730.8       31.7      752.9      812.3      877.2       0.00       0.14       0.14       0.14
 HCFC-142b        1975.0        0.0    29075.8      811.4       0.18        0.0        0.0        0.0        0.0    70796.4  -109388.7    28978.3   167880.7       35.1      744.5      810.7      882.1       0.00       0.18       0.18       0.18
 HCFC-142b        1976.0        0.0    28264.4      809.7       0.21        0.0        0.0        0.0        0.0    70783.0  -110154.3    28168.9   167034.3       38.6      736.0      809.0      887.3       0.00       0.21       0.21       0.21
 HCFC-142b        1977.0        0.0    27454.7      808.2       0.25        0.0        0.0        0.0        0.0    70768.0  -110942.7    27361.5   166180.2       42.2      727.5      807.6      892.9       0.00       0.25       0.25       0.25
 HCFC-142b        1978.0        0.0    26646.5      806.9       0.28        0.0        0.0        0.0        0.0    70751.4  -111720.9    26545.3   165355.5       45.7      719.3      806.3      898.5       0.00       0.28       0.28       0.28
 HCFC-142b        1979.0        0.0    25839.6     1159.9       0.32        0.0        0.0        0.0        0.0    70733.5  -112499.4    25743.7   164507.8       56.2     1052.6     1158.9     1272.9       0.00       0.32       0.32       0.32
 HCFC-142b        1980.0        0.0    24679.7     1924.2       0.37        0.0        0.0        0.0        0.0    70711.7  -113611.0    24577.4   163281.3       78.7     1774.6     1922.5     2083.4       0.00       0.37       0.37       0.37
 HCFC-142b        1981.0     2845.7    22755.5     1936.6       0.46      142.2     2566.9     2845.7     3124.5    70682.2  -115472.6    22659.8   161289.2       87.3     1770.2     1934.9     2112.4       0.00       0.46       0.46       0.46
 HCFC-142b        1982.0     2087.8    23664.6     2049.3       0.55      104.3     1883.2     2087.8     2292.3    70577.8  -114354.6    23570.0   162003.5       98.3     1861.6     2047.5     2247.0       0.00       0.55       0.55       0.55
 HCFC-142b        1983.0     2424.4    23703.1     1606.5       0.64      121.2     2186.9     2424.4     2661.9    70488.0  -114134.1    23615.9   161866.5       98.9     1416.4     1605.3     1804.6       0.00       0.64       0.64       0.64
 HCFC-142b        1984.0     2587.2    24520.9     1313.5       0.70      129.3     2333.7     2587.2     2840.6    70389.3  -113107.5    24433.1   162507.8      100.7     1119.8     1312.4     1514.3       0.00       0.70       0.70       0.70
 HCFC-142b        1985.0     1507.0    25794.5     1227.0       0.74       75.3     1359.3     1507.0     1654.6    70286.3  -111617.7    25701.7   163616.2      104.0     1026.5     1226.0     1434.1       0.00       0.74       0.74       0.74
 HCFC-142b        1986.0     7833.0    26074.5     1301.5       0.77      391.4     7065.6     7833.0     8600.5    70209.3  -111179.0    25980.4   163722.6      108.8     1091.7     1300.4     1518.2       0.00       0.77       0.77       0.77
 HCFC-142b        1987.0     7571.2    32606.0     1957.3       0.81      378.4     6829.5     7571.2     8313.0    69974.7  -104220.5    32522.5   169791.8      123.3     1720.0     1955.8     2204.1       0.00       0.81       0.81       0.81
 HCFC-142b        1988.0     8625.0    38220.0     3636.5       0.88      431.0     7780.0     8625.0     9470.0    69741.9   -98112.5    38144.4   174956.3      165.0     3321.9     3633.3     3968.8       0.00       0.88       0.88       0.88
 HCFC-142b        1989.0    16191.0    43208.5     4187.6       1.04      809.1    14604.7    16191.0    17777.3    69470.3   -92614.8    43114.2   179430.3      193.2     3818.9     4183.9     4576.4       0.00       1.04       1.04       1.04
 HCFC-142b        1990.0    21896.0    55211.9    10182.6       1.23     1094.2    19750.8    21896.0    24041.3    69009.6   -79738.1    55123.2   190523.3      361.8     9498.2    10173.9    10919.9       0.00       1.23       1.23       1.23
 HCFC-142b        1991.0    27601.0    66925.3    18542.2       1.77     1379.3    24896.9    27601.0    30305.2    68373.5   -66897.1    66854.6   201011.6      628.8    17354.6    18526.3    19826.7       0.00       1.77       1.77       1.77
 HCFC-142b        1992.0    33306.0    75984.1    21352.0       2.76     1664.4    30043.0    33306.0    36569.2    67543.3   -56196.9    75878.8   208378.7      770.4    19893.2    21333.2    22919.6       0.00       2.76       2.76       2.76
 HCFC-142b        1993.0    37361.6    87938.1    24408.1       3.87     1867.1    33701.2    37361.6    41022.1    66554.2   -42244.2    87811.9   218395.3      932.8    22636.6    24386.8    26301.8       0.00       3.87       3.87       3.87
 HCFC-142b        1994.0    41535.2   100891.6    24648.3       5.09     2075.7    37465.9    41535.2    45604.6    65453.4   -27150.9   100732.4   229162.8     1040.4    22667.4    24626.6    26751.7       0.00       5.09       5.09       5.09
 HCFC-142b        1995.0    44813.9   117778.5    23135.5       6.26     2239.5    40423.4    44813.9    49204.6    64269.7    -7978.5   117635.1   243916.9     1115.0    21005.5    23115.2    25378.8       0.00       6.26       6.26       6.26
 HCFC-142b        1996.0    35502.0   139456.9    25350.0       7.29     1774.2    32023.8    35502.0    38980.3    63052.6    15994.2   139307.5   263173.7     1263.4    22933.0    25328.1    27889.9       0.00       7.29       7.29       7.29
 HCFC-142b        1997.0    41739.0   149609.0    23018.5       8.38     2085.8    37649.8    41739.0    45828.4    62014.7    28301.4   149458.5   271300.4     1330.3    20466.4    23000.5    25684.6       0.00       8.38       8.38       8.38
 HCFC-142b        1998.0    40179.0   168329.5    26464.9       9.28     2007.9    36242.6    40179.0    44115.5    60912.4    49149.8   168207.2   287930.3     1491.7    23605.3    26444.1    29456.0       0.00       9.28       9.28       9.28
 HCFC-142b        1999.0    40551.7   182043.5    27473.7      10.34     2026.5    36578.8    40551.7    44524.8    59865.5    64682.7   181917.3   299583.6     1623.4    24355.2    27452.2    30726.6       0.00      10.33      10.34      10.34
 HCFC-142b        2000.0    40274.1   195121.5    26957.5      11.39     2012.6    36328.4    40274.1    44220.0    58862.8    79609.3   195042.4   310605.0     1729.5    23631.4    26936.7    30415.6       0.00      11.39      11.39      11.39
 HCFC-142b        2001.0    33946.4   208438.1    25966.2      12.36     1696.4    30620.6    33946.4    37272.3    57932.3    94641.3   208366.6   322171.3     1821.2    22466.1    25944.1    29600.6       0.00      12.36      12.36      12.36
 HCFC-142b        2002.0    25086.3   216418.3    23690.2      13.22     1253.6    22628.6    25086.3    27544.1    57146.6   104158.3   216341.0   328612.0     1884.1    20061.6    23669.7    27441.7       0.00      13.22      13.22      13.22
 HCFC-142b        2003.0    31379.7   217814.4    23347.7      13.90     1568.1    28305.4    31379.7    34454.1    56519.9   106977.6   217721.8   328790.0     1958.1    19574.1    23328.9    27246.5       0.00      13.90      13.90      13.90
 HCFC-142b        2004.0    38050.0   225846.3    23390.7      14.52     1901.5    34322.2    38050.0    41778.0    55919.1   116142.3   225769.3   335518.2     2031.5    19473.1    23371.9    27432.9       0.00      14.52      14.52      14.52
 HCFC-142b        2005.0    29421.7   240505.6    26112.2      15.11     1470.3    26539.2    29421.7    32304.2    55377.3   131918.6   240452.8   349070.9     2139.3    21990.2    26090.0    30369.6       0.00      15.11      15.11      15.11
 HCFC-142b        2006.0    48489.1   243815.0    32606.9      15.83     2423.2    43738.6    48489.2    53239.9    54995.7   135772.2   243811.0   351501.4     2321.5    28143.5    32578.4    37239.4       0.00      15.83      15.83      15.83
 HCFC-142b        2007.0    50784.2   259697.3    37532.6      16.89     2537.9    45808.8    50784.3    55759.8    54676.4   152423.8   259663.0   366860.0     2522.3    32684.0    37502.5    42568.8       0.00      16.89      16.89      16.89
 HCFC-142b        2008.0    54036.6   272949.0    36350.6      18.18     2700.4    48742.5    54036.6    59330.8    54560.7   165986.3   272949.7   379918.2     2649.2    31256.4    36318.3    41637.4       0.00      18.18      18.18      18.18
 HCFC-142b        2009.0    60539.2   290634.9    38050.1      19.33     3025.3    54608.0    60539.2    66470.5    54691.9   183495.6   290621.8   397885.7     8507.7    22539.6    37707.5    55508.1       0.00      19.33      19.33      19.33
 HCFC-142b        2010.0    50190.9   313124.0    39151.2      20.53     2508.2    45273.6    50190.9    55108.3    57817.4   197861.0   313664.9   425066.3     7792.6    24209.4    39045.1    54761.9       0.51      19.59      20.51      21.58
 HCFC-142b        2011.0    55651.8   324163.6    40772.6      21.72     2781.1    50199.5    55651.8    61104.3    61552.2   200298.0   325117.4   442004.4     7434.7    26069.5    40819.8    55233.9       0.96      19.93      21.69      23.67
 HCFC-142b        2012.0    61112.7   339042.8    42838.6      22.95     3054.0    55125.4    61112.8    67100.3    65848.7   205653.7   340287.8   464406.3     7292.9    28137.7    42988.2    56738.1       1.36      20.36      22.92      25.70
 HCFC-142b        2013.0    47460.4   357316.9    43137.2      24.23     2371.8    42810.6    47460.4    52110.3    70658.0   213868.9   358691.1   491671.5     6674.5    29244.0    43436.0    55323.6       1.74      20.89      24.20      27.73
 HCFC-142b        2014.0    47460.4   361640.1    43427.8      25.46     2371.8    42810.6    47460.4    52110.3    75223.7   209316.6   362927.2   505374.0     6157.4    30254.2    43833.9    54282.0       2.06      21.45      25.44      29.58
 HCFC-142b        2015.0    36303.7   365672.7    42449.5      26.64     1814.2    32747.0    36303.7    39860.6    79565.6   205670.1   366676.3   518713.3     5370.7    30571.1    42957.4    51480.6       2.35      22.04      26.63      31.29
 HCFC-142b        2016.0    36303.7   359526.9    41615.2      27.71     1814.2    32747.0    36303.7    39860.6    83240.5   193683.1   360089.5   521109.3     4744.8    30850.2    42159.0    49385.1       2.58      22.61      27.71      32.76
 HCFC-142b        2017.0    36303.7   354215.4    40901.1      28.66     1814.2    32747.0    36303.7    39860.6    86394.1   183987.3   354096.1   523720.9     4240.9    31112.3    41422.3    47740.9       2.76      23.15      28.68      34.04
 HCFC-142b        2018.0    36303.7   349618.0    40288.2      29.53     1814.2    32747.0    36303.7    39860.6    89109.5   176336.1   348745.7   526578.4     3831.9    31351.2    40768.5    46449.2       2.92      23.68      29.56      35.17
 HCFC-142b        2019.0    36303.7   345633.6    39760.9      30.31     1814.2    32747.0    36303.7    39860.6    91457.0   170136.1   343947.6   529157.5     3497.9    31566.5    40181.6    45402.8       3.05      24.19      30.35      36.20
 HCFC-142b        2020.0    22771.9   342176.4    37781.9      31.02     1138.0    20540.9    22771.9    25002.9    93495.2   165139.9   339666.8   531941.7     2950.9    30933.7    38088.6    42650.0       3.16      24.67      31.06      37.13
 HCFC-142b        2021.0    22771.9   327166.3    36056.7      31.58     1138.0    20540.9    22771.9    25002.9    94768.1   150253.9   323734.6   521814.6     2586.0    30207.4    36279.1    40436.6       3.23      25.07      31.62      37.86
 HCFC-142b        2022.0    22771.9   313881.5    34548.2      32.01     1138.0    20540.9    22771.9    25002.9    95482.0   138318.5   309510.0   512454.8     2347.8    29373.0    34716.6    38609.7       3.29      25.41      32.03      38.42
 HCFC-142b        2023.0    22771.9   302105.2    33226.3      32.32     1138.0    20540.9    22771.9    25002.9    95763.8   128856.9   296847.7   503867.7     2192.9    28472.9    33366.6    37086.5       3.33      25.69      32.33      38.86
 HCFC-142b        2024.0    22771.9   291650.7    32065.5      32.54     1138.0    20540.9    22771.9    25002.9    95713.5   121293.3   285531.5   495857.5     2089.4    27547.4    32191.2    35769.4       3.36      25.89      32.53      39.19
 HCFC-142b        2025.0    11514.1   282357.1    29776.2      32.69      575.4    10386.1    11514.1    12642.2    95410.0   115262.5   275405.0   488345.7     2164.8    24870.7    29963.3    33443.4       3.39      26.04      32.65      39.45
[truncated: 358,371 more chars]
